# Supplementary material
Source: MDPI journal article supplement (https://www.mdpi.com/2077-0472/13/1/117)
Supplement: s1 [file s1 › Table S1.pdf]

**Table S1.** Primers used for pooled DNA sequencing for the *DDIT3* gene.

| Primers | Location    | Primers Sequences (5'-3')     | Annealing Temperature | PCR Products |
|---------|-------------|-------------------------------|-----------------------|--------------|
| P1      | 5' flanking | F:<br>R:                      | 58 °C                 | 591bp        |
| P2      | 5' flanking | F:<br>R:                      | 60 °C                 | 470bp        |
| P3      | 5' flanking | F:<br>R:                      | 60 °C                 | 356 bp       |
| P4      | exon1       | F:<br>R:                      | 59 °C                 | 496 bp       |
| P5      | exon2       | F:<br>R:                      | 60 °C                 | 521 bp       |
| P6      | exon3       | F:<br>R:                      | 58 °C                 | 401 bp       |
| P7      | exon4       | F: GTCACTGCCTTTCTCCTTCG<br>R: | 60 °C                 | 687 bp       |
| P8      | exon4       | F:<br>R:                      | 60 °C                 | 458 bp       |
