# Supplementary material
Source: MDPI journal article supplement (https://www.mdpi.com/2077-0472/13/1/117)
Supplement: s1 [file s1 › Table S2.pdf]

**Table S2.** Genotypic and allelic frequencies of the 2 SNPs in *DDIT3* gene.

| SNP ID | Gene Region       | Variants    | Genotype | Genotype<br>Frequencies | Allele<br>Frequencies |
|--------|-------------------|-------------|----------|-------------------------|-----------------------|
| SNP1   | 5'flanking region | g.-1194 C>T | CC       | 0.436                   | 0.655(C)              |
|        |                   |             | CT       | 0.448                   |                       |
|        |                   |             | TT       | 0.116                   |                       |
| SNP2   | 5'flanking region | g.-128 C>T  | CC       | 0.436                   | 0.655(C)              |
|        |                   |             | CT       | 0.448                   |                       |
|        |                   |             | TT       | 0.116                   |                       |
