# Supplementary material
Source: MDPI journal article supplement (https://www.mdpi.com/2077-0472/13/1/117)
Supplement: s1 [file s1 › Table S3.pdf]

**Table S3.** Genetic effects of g.-1194 C>T and g.-128 C>T on milk production traits in Chinese Holsteins.

| SNPs        | Genotype                        | MY              | FY             | FP      | PY            | PP      |
|-------------|---------------------------------|-----------------|----------------|---------|---------------|---------|
| g.-1194 C>T | Additive(a)                     | <b>96.77 **</b> | <b>5.13 **</b> | 0.0153  | <b>2.57 *</b> | -0.0050 |
|             | Dominant(d)                     | -27.09          | -1.27          | -0.0029 | 0.39          | 0.0098  |
|             | Allele substitution( $\alpha$ ) | <b>88.08 *</b>  | <b>4.72 **</b> | 0.0143  | <b>2.70 *</b> | -0.0019 |
| g.-128 C>T  | Additive(a)                     | <b>96.77 **</b> | <b>5.13 **</b> | 0.0153  | <b>2.57 *</b> | -0.0050 |
|             | Dominant(d)                     | -27.09          | -1.27          | -0.0029 | 0.39          | 0.0098  |
|             | Allele substitution( $\alpha$ ) | <b>88.08 *</b>  | <b>4.72 **</b> | 0.0143  | <b>2.70 *</b> | -0.0019 |

\* Significant at  $p < 0.05$ ; \*\* Significant at  $p < 0.01$ .
