# Supplementary material
Source: MDPI journal article supplement (https://www.mdpi.com/2077-0472/13/1/117)
Supplement: s1 [file s1 › Table S4.xls]

gene_id	D287_1	D287_2	D287_3	NC_1	NC_2	NC_3	D287	NC	log2FoldChange	pvalue	padj	gene_name	gene_chr	gene_start	gene_end	gene_strand	gene_length	gene_biotype	gene_description	tf_family
ENSBTAG00000014921	1041.340652	1034.628063	1078.748301	56.31672787	40.54711758	72.02043113	1051.572339	56.29475886	4.220473537	2.20E-116	3.49E-112	IL6	4	31454749	31459131	+	1115	protein_coding	Bos taurus interleukin 6 (IL6), mRNA. [Source:RefSeq mRNA;Acc:NM_173923]	-
ENSBTAG00000019716	8492.073626	8371.990363	10265.60208	1069.012174	950.8299072	1341.137218	9043.222023	1120.326433	3.012722164	2.57E-94	2.04E-90	CXCL8	6	88810418	88814572	+	1870	protein_coding	C-X-C motif chemokine ligand 8 [Source:VGNC Symbol;Acc:VGNC:27853]	-
ENSBTAG00000037558	2454.871499	2465.113819	2675.490156	335.8890555	391.2796846	450.6143191	2531.825158	392.5943531	2.688657252	2.29E-91	1.21E-87	GRO1	6	89072611	89075133	+	1474	protein_coding	chemokine (C-X-C motif) ligand 1 (melanoma growth stimulating activity, alpha) [Source:NCBI gene;Acc:281212]	-
ENSBTAG00000000436	2898.332157	2930.946357	2969.959287	731.1118064	634.5623901	713.3915679	2933.079267	693.0219215	2.081320714	1.61E-83	6.41E-80	TNFAIP3	9	75740934	75756753	+	5253	protein_coding	TNF alpha induced protein 3 [Source:VGNC Symbol;Acc:VGNC:36155]	OTU
ENSBTAG00000010069	858.2151573	845.6959817	854.2520333	121.6843584	88.18998073	103.1644014	852.7210574	104.3462468	3.030522282	2.46E-81	7.80E-78	EGR1	7	49825961	49830306	+	3655	protein_coding	early growth response 1 [Source:VGNC Symbol;Acc:VGNC:52766]	-
novel.655	1022.533169	1069.615485	946.5773383	124.701326	150.024335	163.5058437	1012.908664	146.0771682	2.793015517	1.79E-76	4.73E-73	-	18	62113126	62116762	+	1099	-	PF07400:Interleukin 11	-
ENSBTAG00000054085	1008.675023	1017.634172	1181.763905	4686.356283	4261.502057	5125.129599	1069.3577	4690.99598	-2.133088949	1.87E-70	4.25E-67	SELENOP	20	31761770	31771443	+	2164	protein_coding	Bos taurus selenoprotein P (SELENOP), mRNA. [Source:RefSeq mRNA;Acc:NM_174459]	-
ENSBTAG00000030932	114.8246347	111.9597517	131.1991177	656.6932732	697.4104223	670.5686088	119.3278347	674.8907681	-2.499220949	5.58E-60	1.11E-56	IFI44L	3	66053647	66071372	-	2090	protein_coding	interferon induced protein 44 like [Source:VGNC Symbol;Acc:VGNC:30046]	-
ENSBTAG00000034985	2825.081959	2657.044822	2456.82496	793.4624694	829.1885545	782.4922518	2646.317247	801.7144252	1.722865922	4.08E-56	7.19E-53	PHLDA1	5	5573899	5575874	-	1550	protein_coding	Bos taurus pleckstrin homology like domain family A member 1 (PHLDA1), mRNA. [Source:RefSeq mRNA;Acc:NM_001105631]	-
ENSBTAG00000014465	30648.27878	30170.15416	30075.69701	10614.69755	10128.66997	11815.2437	30298.04332	10852.87041	1.481125746	4.88E-52	7.74E-49	SERPINE1	25	35596139	35617193	-	4431	protein_coding	serpin family E member 1 [Source:VGNC Symbol;Acc:VGNC:34476]	Serpin
ENSBTAG00000009844	15462.72084	15522.41986	13974.16381	4466.117651	4451.059832	5259.437971	14986.43484	4725.538485	1.665052691	6.17E-52	8.90E-49	CYR61	3	58488378	58491302	-	2330	protein_coding	Bos taurus cysteine rich angiogenic inducer 61 (CYR61), mRNA. [Source:RefSeq mRNA;Acc:NM_001034340]	VWC
ENSBTAG00000003152	103.9360917	62.97736034	67.05732684	674.7950786	559.5502226	648.1838802	77.99025963	627.5097271	-3.008450656	7.98E-50	1.06E-46	IFI27	21	58735482	58744443	+	1112	protein_coding	Bos taurus putative ISG12(a) protein (IFI27), mRNA. [Source:RefSeq mRNA;Acc:NM_001038050]	-
ENSBTAG00000021326	256.3756929	286.8968638	308.0749653	14.07918197	14.19149115	15.57198511	283.7825073	14.61421941	4.278584319	1.63E-49	2.00E-46	CCL20	2	115948258	115951955	+	986	protein_coding	C-C motif chemokine ligand 20 [Source:VGNC Symbol;Acc:VGNC:26947]	-
ENSBTAG00000013320	376.1496652	328.8817707	338.2021702	1170.583415	1331.972812	1337.244221	347.7445354	1279.933483	-1.88000442	3.11E-48	3.53E-45	TSPAN1	3	99895907	99901044	-	1331	protein_coding	Bos taurus tetraspanin 1 (TSPAN1), mRNA. [Source:RefSeq mRNA;Acc:NM_001034270]	Tetraspannin
ENSBTAG00000053807	1358.098265	1424.487912	1460.683511	5700.057385	5583.338091	4169.399013	1414.423229	5150.931496	-1.864558152	1.98E-42	2.10E-39	-	17	61376225	61385129	-	3520	protein_coding	-	NTP_transf_2
ENSBTAG00000026369	1803.538658	1889.32081	2069.058679	685.857293	655.8496268	648.1838802	1920.639382	663.2969333	1.533953388	4.29E-42	4.25E-39	ENC1	20	6918477	6930788	+	4463	protein_coding	Bos taurus ectodermal-neural cortex 1 (ENC1), mRNA. [Source:RefSeq mRNA;Acc:NM_001078067]	BACK
ENSBTAG00000007554	864.1543625	875.6852009	913.5345976	3148.708481	3474.887976	4796.171414	884.4580537	3806.589291	-2.105679228	5.24E-41	4.90E-38	IFI6	2	125662055	125665793	+	857	protein_coding	interferon alpha inducible protein 6 [Source:VGNC Symbol;Acc:VGNC:30047]	-
ENSBTAG00000039861	1367.99694	1475.469585	1458.73982	4630.039555	4340.568937	5924.167085	1434.068782	4964.925192	-1.79171173	3.44E-40	3.04E-37	OAS1Y	17	61363053	61371004	-	1691	protein_coding	Bos taurus 2',5'-oligoadenylate synthetase 1, 40/46kDa (OAS1Y), mRNA. [Source:RefSeq mRNA;Acc:NM_001040606]	NTP_transf_2
ENSBTAG00000009987	2966.633018	2931.945998	3027.298161	6500.559445	6552.414201	6544.126742	2975.292392	6532.366796	-1.134561572	1.09E-38	9.14E-36	ITGB3	19	46329945	46392416	+	6268	protein_coding	Bos taurus integrin subunit beta 3 (ITGB3), mRNA. [Source:RefSeq mRNA;Acc:NM_001206490]	-
ENSBTAG00000007881	166.2977467	167.9396276	173.9603117	608.4217921	669.02744	602.4411739	169.3992287	626.6301354	-1.886988765	1.83E-38	1.45E-35	IFIT1	26	11068424	11074395	+	1437	protein_coding	interferon-induced protein with tetratricopeptide repeats 1 [Source:NCBI gene;Acc:100139670]	-
ENSBTAG00000017021	2144.053092	2112.240673	2072.94606	812.5699307	759.2447767	860.3521773	2109.746608	810.7222949	1.379608119	3.20E-38	2.42E-35	MCM4	14	19551601	19563221	+	3667	protein_coding	Bos taurus minichromosome maintenance complex component 4 (MCM4), mRNA. [Source:RefSeq mRNA;Acc:NM_001075158]	MCM
ENSBTAG00000008471	62.36165503	40.98526625	67.05732684	397.2340626	414.5942772	350.369665	56.80141604	387.399335	-2.768405779	5.98E-38	4.32E-35	MX2	1	141621165	141658223	+	4238	protein_coding	MX dynamin like GTPase 2 [Source:VGNC Symbol;Acc:VGNC:50221]	-
ENSBTAG00000008353	4387.092938	4793.27687	4556.010844	1791.073077	1622.898381	1927.033157	4578.793551	1780.334872	1.362705483	1.84E-36	1.27E-33	CDKN1A	23	10582308	10590589	+	2352	protein_coding	Bos taurus cyclin dependent kinase inhibitor 1A (CDKN1A), mRNA. [Source:RefSeq mRNA;Acc:NM_001098958]	-
ENSBTAG00000015131	1387.794291	1571.435087	1437.359223	554.116376	517.9894271	518.741754	1465.529534	530.282519	1.466596825	3.57E-36	2.36E-33	SLC29A1	23	17730856	17741105	+	2304	protein_coding	Bos taurus solute carrier family 29 member 1 (SLC29A1), mRNA. [Source:RefSeq mRNA;Acc:NM_001034398]	-
ENSBTAG00000010085	1171.0133	1195.570206	1312.963023	333.8777438	375.0608376	258.8842525	1226.515509	322.6076113	1.927383861	4.57E-36	2.90E-33	SLC7A2	27	19719908	19745898	-	2150	protein_coding	solute carrier family 7 member 2 [Source:VGNC Symbol;Acc:VGNC:34928]	-
ENSBTAG00000048916	1228.425617	1287.537145	1258.539685	463.6073491	457.1687507	500.2500217	1258.167482	473.6753738	1.409133818	1.32E-34	8.09E-32	LIPG	24	49207795	49241327	+	4178	protein_coding	lipase G, endothelial type [Source:NCBI gene;Acc:509808]	Lipase
ENSBTAG00000011358	16928.71467	16528.05835	15011.12276	6628.277739	6153.025093	7159.220154	16155.96526	6646.840995	1.281292198	1.79E-34	1.05E-31	IER3	23	28284912	28286183	+	1172	protein_coding	Bos taurus immediate early response 3 (IER3), mRNA. [Source:RefSeq mRNA;Acc:NM_001075202]	-
ENSBTAG00000012406	291.0210568	355.8720679	276.9759152	1038.842498	958.9393307	1105.610943	307.9563467	1034.464257	-1.748505193	5.99E-34	3.40E-31	ZBP1	13	58563618	58574289	+	2814	protein_coding	Z-DNA binding protein 1 [Source:VGNC Symbol;Acc:VGNC:37056]	-
ENSBTAG00000037778	1969.836405	2095.246782	2013.663496	715.0213128	757.2174208	850.6196866	2026.248894	774.2861401	1.387647945	8.32E-34	4.56E-31	-	6	89061093	89063360	+	1284	protein_coding	-	-
ENSBTAG00000016061	246.4770175	266.904051	310.018656	897.0450225	943.7341616	1148.433902	274.4665748	996.404362	-1.860017451	4.41E-33	2.26E-30	RSAD2	11	90038994	90056291	-	2562	protein_coding	Bos taurus radical S-adenosyl methionine domain containing 2 (RSAD2), mRNA. [Source:RefSeq mRNA;Acc:NM_001045941]	Radical_SAM
ENSBTAG00000030913	2331.138057	2439.123162	2433.500673	5344.055212	5167.730135	5833.654922	2401.253964	5448.48009	-1.182098	4.42E-33	2.26E-30	MX1	1	141677687	141706496	+	2883	protein_coding	Bos taurus MX dynamin like GTPase 1 (MX1), mRNA. [Source:RefSeq mRNA;Acc:NM_173940]	-
ENSBTAG00000034349	37.61496652	43.98418817	49.56411114	261.4705222	276.7340775	355.2359103	43.72108861	297.8135033	-2.76784719	3.70E-32	1.84E-29	IFI44	3	66029139	66043630	-	1340	protein_coding	interferon induced protein 44 [Source:VGNC Symbol;Acc:VGNC:30045]	-
ENSBTAG00000014707	219.7505939	214.9227377	221.5807322	1044.876433	1148.497105	2135.308458	218.7513546	1442.893999	-2.721733983	1.47E-31	7.09E-29	ISG15	16	51464069	51465107	-	602	protein_coding	Bos taurus ISG15 ubiquitin-like modifier (ISG15), mRNA. [Source:RefSeq mRNA;Acc:NM_174366]	ubiquitin
ENSBTAG00000010030	677.0693974	703.7470108	575.3324274	159.8992809	184.489385	126.522379	652.0496119	156.9703483	2.055335001	2.08E-31	9.73E-29	EPHA4	2	109525497	109678039	-	3032	protein_coding	EPH receptor A4 [Source:VGNC Symbol;Acc:VGNC:56106]	Pkinase_Tyr
ENSBTAG00000032265	264.2946332	260.9062071	367.3575297	1071.023485	1041.047244	1018.991776	297.5194567	1043.687502	-1.810146605	6.28E-31	2.85E-28	RTP4	1	79911983	79916543	-	1984	protein_coding	receptor transporter protein 4 [Source:VGNC Symbol;Acc:VGNC:53603]	-
ENSBTAG00000048511	251.4263552	252.909082	249.7642464	37.20926663	32.43769406	48.66245347	251.3665612	39.43647139	2.669961464	1.72E-30	7.60E-28	-	18	53132124	53138383	+	1008	lncRNA	-	-
ENSBTAG00000001321	224.6999316	254.9083633	233.242876	38.21492248	38.5197617	26.27772487	237.617057	34.33746968	2.792899728	2.71E-30	1.16E-27	IL1B	11	46543394	46552101	-	1930	protein_coding	interleukin 1 beta [Source:VGNC Symbol;Acc:VGNC:52787]	-
ENSBTAG00000051298	2771.629112	2678.037275	2198.314106	962.412653	990.3633469	937.2388538	2549.326831	963.3382846	1.403997921	6.91E-30	2.89E-27	PVR	18	52421184	52440074	+	3812	protein_coding	poliovirus receptor [Source:NCBI gene;Acc:526865]	V-set
ENSBTAG00000008611	1418.480185	1458.475694	1450.965058	625.5179417	606.1794078	547.9392261	1442.640312	593.2121918	1.282310719	1.62E-29	6.61E-27	IGFBP4	19	40672669	40684245	+	2306	protein_coding	Bos taurus insulin like growth factor binding protein 4 (IGFBP4), mRNA. [Source:RefSeq mRNA;Acc:NM_174557]	-
ENSBTAG00000003329	2751.831761	2852.974387	2951.494226	937.2712567	882.9134853	1193.203359	2852.100125	1004.4627	1.505352655	1.99E-29	7.91E-27	FST	20	25580150	25586931	-	2624	protein_coding	follistatin [Source:VGNC Symbol;Acc:VGNC:29134]	-
ENSBTAG00000005675	297.9501296	294.8939889	277.9477605	785.4172226	871.7630279	1008.286036	290.2639597	888.4887621	-1.614257043	8.03E-29	3.11E-26	SLC44A4	23	27480743	27494225	+	2507	protein_coding	Bos taurus solute carrier family 44 member 4 (SLC44A4), mRNA. [Source:RefSeq mRNA;Acc:NM_001083442]	-
ENSBTAG00000009933	1004.715553	1035.627703	1099.157053	2346.195109	2378.088446	2227.76712	1046.500103	2317.350225	-1.14680421	1.06E-28	4.02E-26	DTX3L	1	66988057	66996322	+	3712	protein_coding	Bos taurus deltex E3 ubiquitin ligase 3L (DTX3L), mRNA. [Source:RefSeq mRNA;Acc:NM_001192396]	-
ENSBTAG00000003366	680.039	662.7617445	740.5461312	1603.015433	1571.200806	1706.105619	694.4489586	1626.773952	-1.228016423	6.58E-28	2.43E-25	DDX58	8	11559625	11604095	+	3054	protein_coding	DExD/H-box helicase 58 [Source:VGNC Symbol;Acc:VGNC:27979]	DEAD
ENSBTAG00000008216	2151.972032	2328.163051	2422.810374	899.0563342	865.6809603	1038.456757	2300.981819	934.3980172	1.299952014	7.25E-28	2.62E-25	RRM2	11	87488674	87495961	-	3087	protein_coding	Bos taurus ribonucleotide reductase regulatory subunit M2 (RRM2), transcript variant 1, mRNA. [Source:RefSeq mRNA;Acc:NM_001244181]	-
ENSBTAG00000014529	53.45284716	67.97556354	81.63500659	311.753315	308.1580936	355.2359103	67.68780577	325.0491063	-2.263186637	4.26E-27	1.50E-24	GBP4	3	54451265	54507578	+	2996	protein_coding	Bos taurus guanylate binding protein 4 (GBP4), mRNA. [Source:RefSeq mRNA;Acc:NM_001102261]	-
ENSBTAG00000014380	1022.533169	1052.621594	972.8171619	372.0926663	433.8541581	397.0856203	1015.990642	401.0108149	1.341220308	1.08E-26	3.72E-24	MCM2	22	59896021	59912780	-	3629	protein_coding	minichromosome maintenance complex component 2 [Source:VGNC Symbol;Acc:VGNC:31308]	MCM
ENSBTAG00000046580	232.6188719	207.9252532	169.1010851	625.5179417	651.7949151	717.2845641	203.2150701	664.865807	-1.710550284	2.34E-26	7.91E-24	DHX58	19	42237031	42247670	-	3028	protein_coding	Bos taurus DExH-box helicase 58 (DHX58), mRNA. [Source:RefSeq mRNA;Acc:NM_001015545]	Helicase_C
ENSBTAG00000002779	1731.278328	1783.358902	1853.309019	3586.168778	3520.503484	3834.601333	1789.315416	3647.091198	-1.027350604	1.10E-25	3.63E-23	GABRP	20	2680474	2707201	+	3154	protein_coding	Bos taurus gamma-aminobutyric acid type A receptor pi subunit (GABRP), mRNA. [Source:RefSeq mRNA;Acc:NM_001015618]	Neur_chan_LBD
ENSBTAG00000009049	427.6227773	469.8311009	457.7391441	1093.147914	1032.93782	1061.814735	451.7310075	1062.63349	-1.23413286	1.22E-25	3.95E-23	-	5	57433437	57437847	-	2326	protein_coding	Bos taurus uncharacterized LOC507581 (LOC507581), transcript variant 1, mRNA. [Source:RefSeq mRNA;Acc:NM_001076813]	-
ENSBTAG00000021791	987.887805	1035.627703	1080.691992	2268.759608	2152.038265	2479.838629	1034.735833	2300.212168	-1.152538482	1.71E-25	5.44E-23	PARP9	1	66958506	66988476	-	3368	protein_coding	poly(ADP-ribose) polymerase family member 9 [Source:VGNC Symbol;Acc:VGNC:53596]	A1pp
ENSBTAG00000020536	1917.373425	1987.285593	2221.638394	4290.127877	4279.74826	4745.562462	2042.099137	4438.479533	-1.1199949	4.26E-25	1.33E-22	HERC6	6	36309915	36367045	-	3450	protein_coding	Bos taurus HECT and RLD domain containing E3 ubiquitin protein ligase family member 6 (HERC6), mRNA. [Source:RefSeq mRNA;Acc:NM_001192644]	HECT
ENSBTAG00000052369	768.1372111	558.7991179	500.500338	167.9445277	119.6139969	129.4421262	609.1455557	139.0002169	2.131747304	7.70E-25	2.35E-22	-	NKLS02002005.1	77605	79758	-	2154	lncRNA	-	-
ENSBTAG00000020003	115.8145022	74.97304802	81.63500659	380.1379131	362.8967023	453.5340663	90.80751893	398.8562273	-2.135234996	1.17E-24	3.50E-22	KLHL14	24	24384932	24499896	+	3771	protein_coding	kelch like family member 14 [Source:VGNC Symbol;Acc:VGNC:30644]	Kelch_1
ENSBTAG00000007783	722.6033043	730.7373081	635.586837	271.5270808	251.392129	256.9377543	696.3091498	259.9523214	1.421383109	1.48E-24	4.36E-22	MYBL2	13	72231694	72258247	+	2721	protein_coding	Bos taurus MYB proto-oncogene like 2 (MYBL2), mRNA. [Source:RefSeq mRNA;Acc:NM_001075448]	Myb_DNA-binding
novel.1364	1279.898729	1264.54541	1304.216415	4288.116565	4886.941346	3015.125617	1282.886851	4063.394509	-1.663220275	1.59E-24	4.58E-22	-	4	119580548	119599985	+	18706	-	-	-
ENSBTAG00000001191	314.7778777	307.8893172	297.3846669	71.40156569	50.68389697	82.7261709	306.6839539	68.27054452	2.165750092	3.52E-24	9.98E-22	CCL17	18	25420716	25423723	+	624	protein_coding	C-C motif chemokine ligand 17 [Source:VGNC Symbol;Acc:VGNC:26945]	-
ENSBTAG00000006194	1617.443561	1599.425024	1499.557323	532.997603	573.7417137	360.1021557	1572.141969	488.9471575	1.685437015	4.84E-24	1.35E-21	FOSL1	29	44006997	44013529	-	1909	protein_coding	Bos taurus FOS like 1, AP-1 transcription factor subunit (FOSL1), mRNA. [Source:RefSeq mRNA;Acc:NM_001205985]	bZIP_1
ENSBTAG00000008409	1691.683626	1727.379026	1501.501014	692.8968839	581.8511372	722.1508095	1640.187889	665.6329436	1.300794229	1.04E-23	2.85E-21	MYC	14	12653173	12658366	-	2681	protein_coding	Bos taurus MYC proto-oncogene, bHLH transcription factor (MYC), mRNA. [Source:RefSeq mRNA;Acc:NM_001046074]	Myc_N
ENSBTAG00000016661	864.1543625	951.6578896	877.5763209	2288.872725	2151.024588	3057.948576	897.796191	2499.281963	-1.477190089	2.62E-23	7.04E-21	USP18	5	75988786	76019180	+	2752	protein_coding	Bos taurus ubiquitin specific peptidase 18 (USP18), mRNA. [Source:RefSeq mRNA;Acc:NM_001017940]	UCH
ENSBTAG00000020283	718.6438341	706.7459327	682.2354122	267.5044574	301.062348	276.4027357	702.5417263	281.6565137	1.318756321	2.84E-23	7.52E-21	DUSP5	26	31062738	31075701	+	2599	protein_coding	dual specificity phosphatase 5 [Source:VGNC Symbol;Acc:VGNC:28261]	DSPc
ENSBTAG00000002006	56499.65945	56401.72421	55759.62504	31986.89577	31677.43561	29651.9794	56220.33623	31105.43693	0.853929766	3.30E-23	8.58E-21	THBS1	10	35209595	35224867	+	5292	protein_coding	Bos taurus thrombospondin 1 (THBS1), mRNA. [Source:RefSeq mRNA;Acc:NM_174196]	TSP_C
ENSBTAG00000022520	2188.597131	2280.180301	2178.8772	1091.136602	1080.580683	934.3191066	2215.884877	1035.345464	1.097934283	5.17E-23	1.32E-20	BRCA1	19	43069372	43139018	-	6760	protein_coding	Bos taurus BRCA1, DNA repair associated (BRCA1), mRNA. [Source:RefSeq mRNA;Acc:NM_178573]	zf-C3HC4
ENSBTAG00000010987	2587.51375	2613.060634	2738.660102	1408.923853	1360.355795	1360.602199	2646.411495	1376.627282	0.942934249	2.44E-22	6.15E-20	NFKBIZ	1	46190242	46201247	+	3499	protein_coding	Bos taurus NFKB inhibitor zeta (NFKBIZ), mRNA. [Source:RefSeq mRNA;Acc:NM_174726]	-
ENSBTAG00000011343	319.7272154	334.8796145	411.0905689	904.0846135	1093.758497	1285.662021	355.2324663	1094.50171	-1.623350305	2.50E-22	6.21E-20	XAF1	19	25148636	25166951	-	1852	protein_coding	XIAP associated factor 1 [Source:VGNC Symbol;Acc:VGNC:36982]	-
ENSBTAG00000010422	5168.098427	5081.173375	5849.53696	2549.337592	2390.252581	1984.454852	5366.269587	2308.015009	1.217371936	2.64E-22	6.45E-20	MDM2	5	44979892	45005325	-	3381	protein_coding	Bos taurus MDM2 proto-oncogene (MDM2), mRNA. [Source:RefSeq mRNA;Acc:NM_001099107]	zf-RanBP
ENSBTAG00000008772	1871.839518	1886.321888	2067.114988	959.3956855	925.4879587	967.409575	1941.758798	950.7644064	1.030202578	2.83E-22	6.80E-20	SMC2	8	93707084	93754793	+	4009	protein_coding	structural maintenance of chromosomes 2 [Source:VGNC Symbol;Acc:VGNC:34999]	SMC_N
ENSBTAG00000012137	411.7848967	390.8594904	405.259497	141.7974755	128.7370983	105.1108995	402.634628	125.2151578	1.685934163	4.79E-22	1.13E-19	NTN1	19	28447224	28649129	+	3210	protein_coding	Bos taurus netrin 1 (NTN1), mRNA. [Source:RefSeq mRNA;Acc:NM_001192566]	NTR
ENSBTAG00000011636	1137.357804	1242.553316	1299.357188	567.1899021	563.6049343	553.7787205	1226.422769	561.524519	1.127114495	5.47E-22	1.28E-19	DDIAS	29	12723282	12728390	-	4014	protein_coding	DNA damage induced apoptosis suppressor [Source:VGNC Symbol;Acc:VGNC:27946]	-
ENSBTAG00000009396	569.1738356	600.7840248	593.7974884	191.0746124	243.2827055	213.1415462	587.9184496	215.8329547	1.445877604	5.77E-22	1.33E-19	EXO1	16	34954133	35000907	-	6331	protein_coding	Bos taurus exonuclease 1 (EXO1), mRNA. [Source:RefSeq mRNA;Acc:NM_001304987]	XPG_I
ENSBTAG00000010549	1464.014092	1527.450898	1585.079711	599.3708895	627.4666445	746.4820362	1525.5149	657.7731901	1.213361716	6.02E-22	1.37E-19	IFRD1	4	55863961	55887646	-	2244	protein_coding	Bos taurus interferon related developmental regulator 1 (IFRD1), mRNA. [Source:RefSeq mRNA;Acc:NM_001034729]	-
ENSBTAG00000009996	725.5729069	755.7283241	623.9246932	272.5327366	278.7614334	243.3122673	701.7419747	264.8688124	1.405865044	8.19E-22	1.83E-19	DOT1L	7	21334365	21386441	+	4951	protein_coding	DOT1 like histone lysine methyltransferase [Source:VGNC Symbol;Acc:VGNC:50607]	DOT1
ENSBTAG00000004787	638.4645634	655.76426	616.1499307	1476.302795	1474.901402	1944.551641	636.792918	1631.918612	-1.357864628	8.56E-22	1.89E-19	METRNL	19	49624451	49639773	-	1690	protein_coding	Bos taurus meteorin like, glial cell differentiation regulator (METRNL), mRNA. [Source:RefSeq mRNA;Acc:NM_001206050]	-
ENSBTAG00000007596	998.7763479	1003.639203	1115.678423	435.4489851	451.0866831	484.6780366	1039.364658	457.0712349	1.185097986	1.03E-21	2.24E-19	GEM	14	70066731	70080523	+	3577	protein_coding	GTP binding protein overexpressed in skeletal muscle [Source:VGNC Symbol;Acc:VGNC:29315]	Ras
ENSBTAG00000012180	704.7856885	760.7265273	752.208275	1645.252978	1708.047328	1451.114362	739.2401636	1601.471556	-1.115169973	3.26E-21	7.00E-19	BMF	10	35737731	35757288	-	3382	protein_coding	Bcl2 modifying factor [Source:VGNC Symbol;Acc:VGNC:26513]	-
ENSBTAG00000047416	849.3063494	815.7067625	913.5345976	1714.643232	1733.389276	1723.624102	859.5159031	1723.885537	-1.003958315	4.54E-21	9.61E-19	HEPH	X	94232113	94370235	-	4620	protein_coding	hephaestin [Source:VGNC Symbol;Acc:VGNC:29812]	-
ENSBTAG00000005998	367.2408574	367.8677556	381.9352094	96.54296206	80.08055722	128.4688772	372.3479408	101.6974655	1.870891132	5.93E-21	1.24E-18	NOCT	17	18582256	18600421	-	2086	protein_coding	Bos taurus nocturnin (NOCT), mRNA. [Source:RefSeq mRNA;Acc:NM_001082454]	Exo_endo_phos
ENSBTAG00000006367	6865.721258	6476.671709	6858.312399	3003.894038	3172.811951	3675.961735	6733.568455	3284.222575	1.035756599	6.11E-21	1.26E-18	CTGF	9	69887189	69890613	-	2609	protein_coding	Bos taurus connective tissue growth factor (CTGF), mRNA. [Source:RefSeq mRNA;Acc:NM_174030]	TSP_1
ENSBTAG00000031287	381.0990029	396.8573342	381.9352094	79.44681253	108.4635395	130.4153753	386.6305155	106.1085758	1.864356438	6.57E-21	1.34E-18	TMEM158	22	54003481	54005095	+	1615	protein_coding	Bos taurus transmembrane protein 158 (TMEM158), mRNA. [Source:RefSeq mRNA;Acc:NM_001081626]	-
ENSBTAG00000017366	125.7131776	139.9496896	128.2835818	396.2284068	361.8830244	392.219375	131.315483	383.443602	-1.546240087	7.03E-21	1.41E-18	GRB7	19	40104363	40113096	+	2169	protein_coding	Bos taurus growth factor receptor bound protein 7 (GRB7), mRNA. [Source:RefSeq mRNA;Acc:NM_001046014]	SH2
ENSBTAG00000033398	386.0483406	334.8796145	362.4983031	878.9432171	839.3253339	1068.627478	361.1420861	928.965343	-1.363196393	8.02E-21	1.59E-18	HKDC1	28	25595174	25634958	+	3705	protein_coding	Bos taurus hexokinase domain containing 1 (HKDC1), mRNA. [Source:RefSeq mRNA;Acc:NM_001191484]	-
ENSBTAG00000009997	2435.074149	2449.119569	2296.470483	1238.968013	1275.206848	1294.421262	2393.554733	1269.532041	0.914798537	2.44E-20	4.78E-18	ANO1	29	47168667	47358095	+	4418	protein_coding	anoctamin 1 [Source:VGNC Symbol;Acc:VGNC:50077]	-
ENSBTAG00000010077	1228.425617	1228.558347	1271.173674	625.5179417	610.2341196	628.7188988	1242.719213	621.49032	0.999676142	3.61E-20	7.00E-18	FANCD2	22	16737949	16789121	-	5039	protein_coding	Bos taurus FA complementation group D2 (FANCD2), mRNA. [Source:RefSeq mRNA;Acc:NM_001192429]	-
ENSBTAG00000036016	17.81761572	13.99496896	13.60583443	129.7296053	108.4635395	173.2383343	15.13947304	137.1438264	-3.18023339	3.77E-20	7.22E-18	FAM111B	15	82243028	82258716	+	4166	protein_coding	Bos taurus family with sequence similarity 111 member B (FAM111B), mRNA. [Source:RefSeq mRNA;Acc:NM_001205654]	-
ENSBTAG00000003027	761.2081383	748.7308396	782.3354798	1474.291483	1491.120249	1615.593455	764.0914859	1527.001729	-0.998919342	3.92E-20	7.41E-18	EMX2	26	37830786	37837033	+	2163	protein_coding	Bos taurus empty spiracles homeobox 2 (EMX2), mRNA. [Source:RefSeq mRNA;Acc:NM_001075845]	Homeobox
ENSBTAG00000006307	1003.725686	1079.611892	1267.286293	2553.360215	2512.907612	3235.079907	1116.874623	2767.115911	-1.308911492	4.34E-20	8.11E-18	HSD17B11	6	102227496	102276940	-	1681	protein_coding	Bos taurus hydroxysteroid 17-beta dehydrogenase 11 (HSD17B11), mRNA. [Source:RefSeq mRNA;Acc:NM_001046286]	adh_short
ENSBTAG00000009786	2940.896462	2963.934498	3025.35447	5671.899021	6115.519009	7356.789715	2976.728477	6381.402582	-1.100179481	5.07E-20	9.36E-18	SCIN	4	20624426	20703669	+	4026	protein_coding	Bos taurus scinderin (SCIN), mRNA. [Source:RefSeq mRNA;Acc:NM_174177]	-
ENSBTAG00000017271	855.2455546	922.668311	931.0278133	425.3924266	386.2112949	342.5836724	902.9805596	384.7291313	1.231192537	5.50E-20	1.00E-17	MASTL	13	17750047	17773222	+	3309	protein_coding	microtubule associated serine/threonine kinase like [Source:VGNC Symbol;Acc:VGNC:31260]	Pkinase
ENSBTAG00000020775	525.6196638	426.8465534	466.4857519	115.6504233	159.1474365	165.4523418	472.9839897	146.7500672	1.688040245	6.57E-20	1.19E-17	FIBP	29	43999490	44003899	-	1584	protein_coding	FGF1 intracellular binding protein [Source:VGNC Symbol;Acc:VGNC:29006]	-
ENSBTAG00000008096	400.8963537	348.8745835	324.5963357	101.5712413	124.6823866	109.0038958	358.1224243	111.7525079	1.680324239	7.40E-20	1.32E-17	EDN1	23	44156426	44163955	-	2568	protein_coding	endothelin 1 [Source:VGNC Symbol;Acc:VGNC:28327]	-
ENSBTAG00000020166	2224.232363	2265.185691	2287.723875	3967.312347	4145.942772	3957.230716	2259.04731	4023.495279	-0.83271219	8.71E-20	1.54E-17	ZNFX1	13	77348734	77374973	-	7004	protein_coding	Bos taurus zinc finger NFX1-type containing 1 (ZNFX1), mRNA. [Source:RefSeq mRNA;Acc:NM_001205716]	-
ENSBTAG00000015228	2442.993089	2391.140412	2056.42469	4679.316692	4545.331881	5425.863562	2296.85273	4883.504045	-1.088344025	1.15E-19	2.00E-17	CD74	7	61747923	61755685	-	1565	protein_coding	Bos taurus CD74 molecule (CD74), mRNA. [Source:RefSeq mRNA;Acc:NM_001034735]	-
ENSBTAG00000016354	539.4778093	530.80918	477.1760504	208.1707619	175.3662835	204.3823046	515.8210133	195.9731167	1.395822691	1.24E-19	2.15E-17	IER2	7	12433859	12435630	-	1772	protein_coding	Bos taurus immediate early response 2 (IER2), mRNA. [Source:RefSeq mRNA;Acc:NM_001075871]	-
ENSBTAG00000008636	634.5050932	594.786181	684.1791029	275.5497042	264.5699422	235.5262748	637.823459	258.5486404	1.303186462	1.28E-19	2.19E-17	PDE4B	3	78957184	79406648	-	4425	protein_coding	phosphodiesterase 4B [Source:VGNC Symbol;Acc:VGNC:32676]	-
ENSBTAG00000026156	299.9298646	255.9080039	278.9196059	81.45812424	73.99848958	49.63570254	278.2524915	68.36410545	2.026753739	1.30E-19	2.20E-17	VGLL3	1	35036368	35123427	-	2626	protein_coding	Bos taurus vestigial like family member 3 (VGLL3), mRNA. [Source:RefSeq mRNA;Acc:NM_001191130]	-
ENSBTAG00000010667	179.1660248	181.9345965	186.5943008	463.6073491	469.332886	578.1099472	182.564974	503.6833941	-1.464349229	1.41E-19	2.35E-17	PIK3IP1	17	70094432	70105136	-	2280	protein_coding	Bos taurus phosphoinositide-3-kinase interacting protein 1 (PIK3IP1), mRNA. [Source:RefSeq mRNA;Acc:NM_001075552]	-
ENSBTAG00000017632	274.1933086	306.8896766	266.2856167	93.52599449	76.02584546	75.91342741	282.4562006	81.82175579	1.787660277	1.51E-19	2.48E-17	AEN	21	19591620	19601252	+	1570	protein_coding	apoptosis enhancing nuclease [Source:VGNC Symbol;Acc:VGNC:25705]	Exonuc_X-T
ENSBTAG00000031358	373.1800626	368.8673963	417.8934861	823.6321451	877.8450956	860.3521773	386.6469817	853.9431393	-1.142929681	1.52E-19	2.48E-17	DPYD	3	45408337	46330781	+	4655	protein_coding	Bos taurus dihydropyrimidine dehydrogenase (DPYD), mRNA. [Source:RefSeq mRNA;Acc:NM_174041]	DHO_dh
ENSBTAG00000016131	606.7888021	609.7807906	581.1634993	259.4592105	255.4468407	216.0612934	599.244364	243.6557816	1.298755429	1.85E-19	3.00E-17	NCAPG2	4	119334801	119408828	-	3912	protein_coding	Bos taurus non-SMC condensin II complex subunit G2 (NCAPG2), mRNA. [Source:RefSeq mRNA;Acc:NM_001192449]	-
ENSBTAG00000017280	2404.388255	2326.16377	2151.665531	4674.288413	4707.520351	4101.271578	2294.072519	4494.360114	-0.970194185	1.91E-19	3.06E-17	C3	7	17773675	17810616	+	6042	protein_coding	complement C3 [Source:VGNC Symbol;Acc:VGNC:26638]	A2M_comp
ENSBTAG00000008172	10735.11347	10742.13832	11366.70282	20413.8082	19749.48729	23895.21115	10947.98487	21352.83555	-0.963769904	2.83E-19	4.49E-17	EGLN3	21	44387137	44416154	-	2030	protein_coding	Bos taurus egl-9 family hypoxia inducible factor 3 (EGLN3), mRNA. [Source:RefSeq mRNA;Acc:NM_001101164]	-
ENSBTAG00000018142	642.4240335	695.7498856	801.7723862	285.6062628	267.610976	304.6269587	713.3154351	285.9480658	1.31863579	3.37E-19	5.30E-17	DTL	16	71416165	71464237	-	3642	protein_coding	denticleless E3 ubiquitin protein ligase homolog [Source:VGNC Symbol;Acc:VGNC:28230]	-
ENSBTAG00000000815	4183.180224	4113.521235	3695.927739	2155.120497	2190.558027	2069.127521	3997.543066	2138.268682	0.902680504	5.49E-19	8.55E-17	EPHA2	2	135934234	135972074	+	4414	protein_coding	Bos taurus EPH receptor A2 (EPHA2), mRNA. [Source:RefSeq mRNA;Acc:NM_001205731]	Pkinase_Tyr
ENSBTAG00000017367	1935.191041	1921.309311	2050.593618	3837.582742	3669.514141	4522.688425	1969.031323	4009.928436	-1.02612684	6.33E-19	9.76E-17	IFIT5	26	11081800	11091761	+	3148	protein_coding	Bos taurus interferon induced protein with tetratricopeptide repeats 5 (IFIT5), mRNA. [Source:RefSeq mRNA;Acc:NM_001075698]	-
ENSBTAG00000003458	510.7716507	540.8055864	506.3314099	223.2555998	184.489385	211.1950481	519.3028823	206.3133443	1.331472805	7.02E-19	1.07E-16	CDCA7	2	23340522	23353696	-	2482	protein_coding	Bos taurus cell division cycle associated 7 (CDCA7), mRNA. [Source:RefSeq mRNA;Acc:NM_001037488]	-
ENSBTAG00000018497	389.0179433	381.8627246	420.8090221	131.740917	138.8738777	158.6395983	397.2298966	143.0847977	1.472629391	7.18E-19	1.09E-16	CAVIN2	2	80481033	80494572	-	2690	protein_coding	caveolae associated protein 2 [Source:VGNC Symbol;Acc:VGNC:26803]	-
ENSBTAG00000013953	1108.651645	1157.583861	1065.142467	571.2125255	546.3724094	534.3137391	1110.459324	550.6328913	1.012017626	1.40E-18	2.08E-16	CALD1	4	98573632	98679000	+	2036	protein_coding	Bos taurus caldesmon 1 (CALD1), mRNA. [Source:RefSeq mRNA;Acc:NM_174258]	-
ENSBTAG00000008180	540.4676769	561.7980398	567.5576649	248.3969961	217.940757	239.4192711	556.6077939	235.2523414	1.242316983	1.40E-18	2.08E-16	SPDL1	20	1477149	1510229	+	2457	protein_coding	Bos taurus spindle apparatus coiled-coil protein 1 (SPDL1), mRNA. [Source:RefSeq mRNA;Acc:NM_001076854]	-
ENSBTAG00000046104	1194.770121	1183.574518	1294.497962	2264.736985	2407.485106	2709.525409	1224.280867	2460.5825	-1.007082864	1.96E-18	2.88E-16	B3GALNT1	1	106376776	106377770	+	993	pseudogene	beta-1,3-N-acetylgalactosaminyltransferase 1 [Source:VGNC Symbol;Acc:VGNC:53513]	Galactosyl_T
ENSBTAG00000008333	131.6523828	149.946096	149.6641788	27.15270808	21.28723673	29.19747208	143.7542192	25.87913896	2.47235539	2.34E-18	3.41E-16	ETV4	19	43447918	43462772	-	1717	protein_coding	ETS variant 4 [Source:VGNC Symbol;Acc:VGNC:28630]	ETS_PEA3_N
ENSBTAG00000013148	329.6258908	364.8688337	379.0196735	111.6277999	120.6276748	137.2281188	357.8381327	123.1611978	1.538212825	2.37E-18	3.42E-16	CLDN1	1	76973808	76989396	+	1236	protein_coding	Bos taurus claudin 1 (CLDN1), mRNA. [Source:RefSeq mRNA;Acc:NM_001001854]	-
ENSBTAG00000048782	11756.65677	11972.69595	14519.36903	26732.34393	24795.57608	30803.33305	12749.57392	27443.75102	-1.106025854	2.52E-18	3.61E-16	-	10	103095506	103103769	+	1038	protein_coding	-	C1-set
ENSBTAG00000004150	333.585361	263.905129	263.3700808	70.39590983	86.16262485	48.66245347	286.9535236	68.40699605	2.070317617	2.64E-18	3.74E-16	NRG1	27	28529266	28651519	+	2875	protein_coding	neuregulin 1 [Source:VGNC Symbol;Acc:VGNC:32261]	-
ENSBTAG00000015549	722.6033043	757.7276053	698.7567826	348.9625816	311.1991274	285.1619773	726.3625641	315.1078955	1.205098319	2.72E-18	3.83E-16	PCDH18	17	20288045	20302085	+	5064	protein_coding	Bos taurus protocadherin 18 (PCDH18), mRNA. [Source:RefSeq mRNA;Acc:NM_001102229]	Cadherin
ENSBTAG00000006474	760.2182708	758.727246	755.123811	1632.179452	1495.174961	1989.321098	758.0231092	1705.558504	-1.170076679	2.97E-18	4.13E-16	EPCAM	11	29782764	29793436	+	1566	protein_coding	Bos taurus epithelial cell adhesion molecule (EPCAM), mRNA. [Source:RefSeq mRNA;Acc:NM_001035290]	-
ENSBTAG00000015685	105.9158268	102.962986	95.24084102	274.5440484	325.3906186	341.6104234	101.3732179	313.8483634	-1.630776142	3.76E-18	5.19E-16	KIF12	8	103296384	103331354	-	4290	protein_coding	kinesin family member 12 [Source:VGNC Symbol;Acc:VGNC:30581]	Kunitz_BPTI
ENSBTAG00000053223	3792.182546	3808.63084	4047.735743	6592.074128	6726.766806	7164.0864	3882.84971	6827.642445	-0.814272465	4.02E-18	5.50E-16	CTDSPL	22	11308592	11433811	+	5366	protein_coding	CTD small phosphatase like [Source:NCBI gene;Acc:538425]	NIF
novel.362	672.1200597	603.7829467	801.7723862	1521.557308	1497.202317	1658.416414	692.5584642	1559.05868	-1.170515454	4.83E-18	6.55E-16	-	13	81558142	81590131	+	6247	-	-	-
ENSBTAG00000016656	1752.065546	1623.4164	1777.505084	3152.731105	3344.123522	3019.018613	1717.662343	3171.957747	-0.884843765	5.14E-18	6.91E-16	PARP14	1	67012287	67058498	+	5706	protein_coding	Bos taurus poly (ADP-ribose) polymerase family, member 14 (PARP14), mRNA. [Source:RefSeq mRNA;Acc:NM_001206538]	A1pp
novel.913	549.3764847	589.7879778	763.8704188	1597.987153	1565.118739	1413.157649	634.3449604	1525.42118	-1.265606833	6.74E-18	8.92E-16	-	21	23103932	23108910	+	4979	-	-	-
ENSBTAG00000008182	139.5713232	125.9547207	96.21268634	11.0622144	17.23252497	16.54523418	120.5795767	14.94665785	3.011185052	6.74E-18	8.92E-16	FOSB	18	53074888	53081288	+	3218	protein_coding	Bos taurus FosB proto-oncogene, AP-1 transcription factor subunit (FOSB), mRNA. [Source:RefSeq mRNA;Acc:NM_001102248]	bZIP_1
ENSBTAG00000004041	4645.448366	4710.306697	4909.762539	7861.211817	8116.519261	8034.171068	4755.172534	8003.967382	-0.751205476	1.12E-17	1.47E-15	ANKRD10	12	85327078	85359000	-	2725	protein_coding	Bos taurus ankyrin repeat domain 10 (ANKRD10), mRNA. [Source:RefSeq mRNA;Acc:NM_001101921]	-
ENSBTAG00000017040	20153.70312	20765.53502	20881.06847	34734.34757	34117.35841	38408.30127	20600.1022	35753.33575	-0.795431748	1.49E-17	1.94E-15	LY6E	14	1422652	1426356	-	1194	protein_coding	Bos taurus lymphocyte antigen 6 family member E (LY6E), mRNA. [Source:RefSeq mRNA;Acc:NM_001046070]	-
ENSBTAG00000054218	1600.615812	1467.47246	1541.346672	4559.643646	4369.965597	2942.131937	1536.478315	3957.24706	-1.364800638	1.50E-17	1.94E-15	IGFBP5	2	104659123	104680014	-	3329	protein_coding	Insulin-like growth factor-binding protein 5 [Source:UniProtKB/Swiss-Prot;Acc:Q05717]	-
ENSBTAG00000005448	386.0483406	334.8796145	385.8225907	761.2814821	867.7083162	810.7164748	368.9168486	813.2354243	-1.140181656	1.67E-17	2.14E-15	-	25	34549739	34572255	+	3711	protein_coding	-	C2
ENSBTAG00000019278	1185.861313	1099.604704	1156.495927	501.8222715	495.6885124	339.6639252	1147.320648	445.724903	1.364537993	2.07E-17	2.62E-15	KNTC1	17	52854278	52922614	-	8088	protein_coding	Bos taurus kinetochore associated 1 (KNTC1), mRNA. [Source:RefSeq mRNA;Acc:NM_001192091]	-
ENSBTAG00000037605	449.3998632	463.8332571	413.0342595	971.4635557	984.2812792	1312.912995	442.0891266	1089.55261	-1.301629692	2.41E-17	3.03E-15	BOLA-DQA1	23	25691259	25695296	-	1132	protein_coding	Bos taurus SLA class II histocompatibility antigen, DQ haplotype D alpha chain-like (LOC100848815), mRNA. [Source:RefSeq mRNA;Acc:NM_001319889]	C1-set
ENSBTAG00000054057	215.7911237	241.913035	251.707937	76.42984496	62.84803225	70.073933	236.4706986	69.78393674	1.760591592	2.67E-17	3.33E-15	-	27	28421076	28501099	+	1720	protein_coding	-	I-set
ENSBTAG00000037527	101.9563566	129.9532832	117.5932833	486.7374337	524.0714947	304.6269587	116.5009744	438.478629	-1.911892118	3.33E-17	4.13E-15	OAS1Z	17	61394801	61402638	-	1584	protein_coding	Bos taurus 2',5'-oligoadenylate synthetase 1, 40/46kDa (OAS1Z), mRNA. [Source:RefSeq mRNA;Acc:NM_001029846]	NTP_transf_2
ENSBTAG00000015875	347.4435066	354.8724273	304.1875841	111.6277999	121.6413527	126.522379	335.5011727	119.9305105	1.483687277	3.86E-17	4.75E-15	FOXM1	5	106886687	106900663	+	3485	protein_coding	forkhead box M1 [Source:VGNC Symbol;Acc:VGNC:29094]	Fork_head
ENSBTAG00000001143	583.0319811	600.7840248	635.586837	1393.839015	1260.001679	1846.253485	606.4676143	1500.031393	-1.306612338	6.36E-17	7.77E-15	-	3	54148968	54165067	-	2481	protein_coding	Bos taurus interferon-induced guanylate-binding protein 1 (LOC512486), mRNA. [Source:RefSeq mRNA;Acc:NM_001244229]	-
ENSBTAG00000014773	2587.51375	2571.075727	2925.254403	1514.517717	1334.000168	1316.805991	2694.614626	1388.441292	0.956699979	6.48E-17	7.86E-15	HMMR	7	75137017	75170625	+	3507	protein_coding	Bos taurus hyaluronan mediated motility receptor (HMMR), mRNA. [Source:RefSeq mRNA;Acc:NM_001206621]	-
ENSBTAG00000004221	478.1060219	443.8404443	546.1770679	108.6108323	98.32676013	184.9173232	489.3745114	130.6183052	1.904253178	6.78E-17	8.16E-15	ESM1	20	24108178	24117011	+	2063	protein_coding	Bos taurus endothelial cell specific molecule 1 (ESM1), mRNA. [Source:RefSeq mRNA;Acc:NM_001098101]	-
ENSBTAG00000004028	1702.572169	1732.37723	1959.240158	965.4296206	901.1596882	943.0783482	1798.063186	936.5558857	0.941037091	7.28E-17	8.69E-15	POLK	10	6925321	7006062	+	4404	protein_coding	Bos taurus DNA polymerase kappa (POLK), mRNA. [Source:RefSeq mRNA;Acc:NM_001102258]	IMS
ENSBTAG00000021294	2224.232363	2244.193237	2340.203522	3879.820288	3772.909291	3882.290538	2269.543041	3845.006705	-0.760570963	1.21E-16	1.44E-14	VWA1	16	51109184	51114581	-	2574	protein_coding	Bos taurus von Willebrand factor A domain containing 1 (VWA1), mRNA. [Source:RefSeq mRNA;Acc:NM_001103230]	VWA
ENSBTAG00000015648	1944.099849	2054.261516	2006.860579	1102.198817	1067.40287	1163.032638	2001.740648	1110.878108	0.849445596	1.27E-16	1.49E-14	DNAJC21	20	39183189	39214779	-	6810	protein_coding	DnaJ homolog subfamily C member 21 [Source:UniProtKB/Swiss-Prot;Acc:Q0II91]	DnaJ
ENSBTAG00000005738	2962.673547	2840.9787	2797.942666	1691.513148	1631.007805	1531.894035	2867.198305	1618.138329	0.825371338	1.31E-16	1.53E-14	ATP8B1	24	56868850	56976543	-	4333	protein_coding	Bos taurus ATPase phospholipid transporting 8B1 (ATP8B1), mRNA. [Source:RefSeq mRNA;Acc:NM_001192839]	E1-E2_ATPase
ENSBTAG00000014917	591.940789	586.7890559	603.5159416	288.6232303	262.5425863	274.4562376	594.0819288	275.2073514	1.110135425	1.37E-16	1.59E-14	GTPBP4	13	46331627	46346321	-	2674	protein_coding	Bos taurus GTP binding protein 4 (GTPBP4), mRNA. [Source:RefSeq mRNA;Acc:NM_001192601]	-
ENSBTAG00000010882	226.6796667	284.8975825	246.8487104	76.42984496	84.13526898	62.28794044	252.8086532	74.28435146	1.767885342	1.58E-16	1.81E-14	ANKRD9	21	67251762	67254853	-	1355	protein_coding	Bos taurus ankyrin repeat domain 9 (ANKRD9), mRNA. [Source:RefSeq mRNA;Acc:NM_001102144]	-
ENSBTAG00000016546	1307.61502	1303.531395	1295.469807	2205.40329	2264.556517	2342.61051	1302.205407	2270.856772	-0.802318339	1.84E-16	2.10E-14	PARP12	4	103472247	103519158	-	3719	protein_coding	poly(ADP-ribose) polymerase family member 12 [Source:NCBI gene;Acc:513185]	WWE
ENSBTAG00000017165	2051.005543	2226.199706	2173.046128	3641.47985	3698.910801	3971.829452	2150.083792	3770.740034	-0.810494372	2.10E-16	2.38E-14	MATN2	14	66186820	66359721	-	3609	protein_coding	Bos taurus matrilin 2 (MATN2), mRNA. [Source:RefSeq mRNA;Acc:NM_001102528]	VWA
ENSBTAG00000015541	2035.167662	2189.213002	2084.608204	1128.345869	1194.112613	1009.259285	2102.99629	1110.572589	0.921294279	2.19E-16	2.47E-14	DLC1	27	23395827	23916949	+	7055	protein_coding	DLC1 Rho GTPase activating protein [Source:VGNC Symbol;Acc:VGNC:28084]	START
ENSBTAG00000049919	1556.071773	1666.400947	1957.296468	3588.18009	3560.036923	3200.04294	1726.589729	3449.419984	-0.998323213	2.28E-16	2.54E-14	TFPI	2	8776893	8875333	+	2182	protein_coding	tissue factor pathway inhibitor [Source:NCBI gene;Acc:508763]	Kunitz_BPTI
ENSBTAG00000000604	96.01715139	64.97664162	99.12822229	314.7702825	312.2128054	258.8842525	86.70733843	295.2891135	-1.766910985	2.36E-16	2.62E-14	GPNMB	4	31876899	31903130	+	2842	protein_coding	Bos taurus glycoprotein nmb (GPNMB), mRNA. [Source:RefSeq mRNA;Acc:NM_001038065]	-
ENSBTAG00000010721	993.8270102	1097.605423	1031.127881	468.6356283	458.1824286	557.6717168	1040.853438	494.8299246	1.072379955	2.80E-16	3.08E-14	MCM3	23	24694544	24712140	-	3320	protein_coding	Bos taurus minichromosome maintenance complex component 3 (MCM3), mRNA. [Source:RefSeq mRNA;Acc:NM_001013586]	MCM
ENSBTAG00000002444	3076.508315	3096.886704	2506.389071	1095.159226	1117.073089	613.1469137	2893.261363	941.7930763	1.619422742	3.82E-16	4.18E-14	MKI67	26	47507654	47537887	-	11738	protein_coding	marker of proliferation Ki-67 [Source:VGNC Symbol;Acc:VGNC:55960]	FHA
ENSBTAG00000002260	473.1566842	467.8318197	472.3168238	191.0746124	166.2431821	218.0077915	471.1017759	191.7751953	1.295932284	3.92E-16	4.26E-14	NCAPD3	15	83443176	83503594	-	5327	protein_coding	Bos taurus non-SMC condensin II complex subunit D3 (NCAPD3), mRNA. [Source:RefSeq mRNA;Acc:NM_001193113]	-
ENSBTAG00000004587	512.7513858	592.7868997	550.0644492	232.3065025	260.5152304	232.6065276	551.8675782	241.8094202	1.190626126	4.02E-16	4.34E-14	DUSP6	5	19213683	19217415	-	2109	protein_coding	Bos taurus dual specificity phosphatase 6 (DUSP6), mRNA. [Source:RefSeq mRNA;Acc:NM_001046195]	DSPc
ENSBTAG00000002363	567.1941005	490.8235544	516.0498631	228.283879	229.0912143	181.0243269	524.6891727	212.7998068	1.302605829	4.12E-16	4.41E-14	SESN2	2	125113996	125132377	-	4146	protein_coding	sestrin 2 [Source:VGNC Symbol;Acc:VGNC:34489]	PA26
ENSBTAG00000007490	2899.322025	2916.951388	2373.246263	1441.10484	1394.820845	1356.709203	2729.839892	1397.544962	0.965899388	5.28E-16	5.63E-14	SULF2	13	76156611	76282301	-	5053	protein_coding	Bos taurus sulfatase 2 (SULF2), mRNA. [Source:RefSeq mRNA;Acc:NM_001192938]	Sulfatase
novel.589	264.2946332	242.9126756	271.1448433	85.48074766	95.28572631	71.04718206	259.4507174	83.93788534	1.629221569	5.69E-16	6.03E-14	-	17	73049819	73054927	+	4253	-	-	-
ENSBTAG00000005596	15797.29607	15668.3674	14705.96333	9630.160465	9174.79903	9265.33114	15390.54227	9356.763545	0.717958548	5.90E-16	6.17E-14	IGFBP2	2	104619851	104649017	+	1450	protein_coding	insulin like growth factor binding protein 2 [Source:VGNC Symbol;Acc:VGNC:30084]	-
ENSBTAG00000002127	425.6430422	405.8541	459.6828347	820.6151775	897.1049764	942.1050992	430.3933256	886.6084177	-1.042574818	5.90E-16	6.17E-14	TCP11L2	5	69672951	69713610	+	3813	protein_coding	Bos taurus t-complex 11 like 2 (TCP11L2), mRNA. [Source:RefSeq mRNA;Acc:NM_001105431]	-
ENSBTAG00000012225	2494.466201	2487.105913	2663.828013	1233.939734	1203.235714	1483.231582	2548.466709	1306.802343	0.963431441	6.60E-16	6.85E-14	KPNA2	19	48950358	48960311	-	2084	protein_coding	Bos taurus karyopherin subunit alpha 2 (KPNA2), mRNA. [Source:RefSeq mRNA;Acc:NM_001034449]	Arm
ENSBTAG00000019262	5544.248092	5521.015256	6434.587841	3345.817029	3198.153899	3054.05558	5833.28373	3199.342169	0.866583088	6.87E-16	7.08E-14	TOP2A	19	40627306	40653433	-	5434	protein_coding	DNA topoisomerase II alpha [Source:VGNC Symbol;Acc:VGNC:49583]	DNA_gyraseB
ENSBTAG00000021880	297.9501296	249.9101601	285.7225231	604.3991687	591.9879166	677.3813523	277.8609376	624.5894792	-1.168557033	7.79E-16	7.97E-14	COQ8A	16	29906148	29954708	+	4029	protein_coding	Bos taurus coenzyme Q8A (COQ8A), mRNA. [Source:RefSeq mRNA;Acc:NM_001046419]	ABC1
ENSBTAG00000021193	454.3492009	410.8523032	434.4148565	164.9275602	188.5440967	190.7568176	433.2054535	181.4094915	1.255651233	8.67E-16	8.82E-14	FBXO5	9	89878673	89889302	-	1500	protein_coding	Bos taurus F-box protein 5 (FBXO5), mRNA. [Source:RefSeq mRNA;Acc:NM_001082435]	F-box
ENSBTAG00000003845	755.2689331	814.7071218	948.521029	360.024796	351.746245	410.7111073	839.499028	374.1607161	1.165679672	8.83E-16	8.91E-14	CSRNP1	22	12478903	12492412	-	3192	protein_coding	cysteine and serine rich nuclear protein 1 [Source:VGNC Symbol;Acc:VGNC:27772]	-
ENSBTAG00000012335	362.2915197	319.8850049	378.0478281	717.0326245	735.930184	780.5457536	353.4081176	744.502854	-1.074812277	8.87E-16	8.91E-14	UBA7	22	50420590	50430092	+	3700	protein_coding	Bos taurus ubiquitin like modifier activating enzyme 7 (UBA7), mRNA. [Source:RefSeq mRNA;Acc:NM_001012284]	-
ENSBTAG00000007121	617.677345	649.7664162	541.3178413	236.3291259	231.1185702	288.0817245	602.9205342	251.8431402	1.258775521	8.92E-16	8.91E-14	TK1	19	53977498	53991174	+	2057	protein_coding	thymidine kinase 1 [Source:VGNC Symbol;Acc:VGNC:35884]	TK
ENSBTAG00000019772	358.3320495	359.8706305	425.6682487	891.0110873	829.1885545	761.0807723	381.2903096	827.0934714	-1.11681746	9.57E-16	9.50E-14	OXTR	22	17776079	17785745	+	2274	protein_coding	Bos taurus oxytocin receptor (OXTR), mRNA. [Source:RefSeq mRNA;Acc:NM_174134]	7tm_1
ENSBTAG00000034918	230.6391368	219.9209409	263.3700808	512.8844859	544.3450535	563.5112112	237.9767195	540.2469169	-1.182559934	1.02E-15	1.01E-13	IFIT2	26	11028206	11035934	+	2671	protein_coding	interferon induced protein with tetratricopeptide repeats 2 [Source:VGNC Symbol;Acc:VGNC:30049]	-
novel.417	380.1091354	427.846194	439.2740831	939.2825684	811.9560295	1075.440222	415.7431375	942.2262732	-1.18052219	1.25E-15	1.23E-13	-	14	16363113	16366042	+	2930	-	-	-
ENSBTAG00000012897	1391.753761	1448.479288	1380.02035	2523.19054	2775.450198	2368.888235	1406.751133	2555.842991	-0.86138774	1.69E-15	1.65E-13	ITGA7	5	57548839	57572012	+	4060	protein_coding	Bos taurus integrin subunit alpha 7 (ITGA7), mRNA. [Source:RefSeq mRNA;Acc:NM_001191305]	FG-GAP
ENSBTAG00000017852	2018.339914	2181.215877	2174.989818	3944.182262	4156.079552	5413.211324	2124.848537	4504.491046	-1.084058871	1.96E-15	1.90E-13	ALDH9A1	3	3220577	3249677	+	2264	protein_coding	Bos taurus aldehyde dehydrogenase 9 family member A1 (ALDH9A1), mRNA. [Source:RefSeq mRNA;Acc:NM_001046423]	Aldedh
novel.565	458.3086711	513.8152891	459.6828347	1105.215784	1024.828397	886.6299022	477.2689316	1005.558028	-1.075075463	2.72E-15	2.62E-13	-	16	80458925	80488857	-	11940	-	-	-
ENSBTAG00000010620	3011.177057	2809.98984	2707.561052	4684.344972	4797.737687	4890.576574	2842.909316	4790.886411	-0.752953669	3.63E-15	3.47E-13	ATP6V1B1	11	13454348	13480401	-	2726	protein_coding	Bos taurus ATPase H+ transporting V1 subunit B1 (ATP6V1B1), mRNA. [Source:RefSeq mRNA;Acc:NM_176654]	ATP-synt_ab
ENSBTAG00000008142	767.1473436	846.6956223	864.9423317	1543.681737	1452.600487	1564.011254	826.2617659	1520.097826	-0.879502322	3.69E-15	3.51E-13	IFIH1	2	34111730	34166890	+	3196	protein_coding	interferon induced with helicase C domain 1 [Source:VGNC Symbol;Acc:VGNC:30048]	Helicase_C
ENSBTAG00000038233	172.236952	177.936034	216.7215056	435.4489851	478.4559874	445.7480738	188.9648305	453.2176821	-1.261620481	4.91E-15	4.64E-13	-	3	54715932	54782223	+	3138	protein_coding	guanylate-binding protein 4 [Source:NCBI gene;Acc:507055]	-
ENSBTAG00000007890	166.2977467	148.9464554	224.4962681	517.9127652	515.9620712	441.8550775	179.9134901	491.9099713	-1.450313109	5.00E-15	4.70E-13	SEC14L5	25	4015563	4054421	+	4487	protein_coding	SEC14 like lipid binding 5 [Source:VGNC Symbol;Acc:VGNC:34405]	MSF1
ENSBTAG00000020244	1194.770121	1280.53966	1289.638735	2487.992585	2374.033734	3304.180591	1254.982839	2722.06897	-1.11712547	5.07E-15	4.73E-13	EFNA1	3	15466566	15473164	-	1544	protein_coding	Bos taurus ephrin A1 (EFNA1), mRNA. [Source:RefSeq mRNA;Acc:NM_001034292]	-
ENSBTAG00000008497	119.7739724	124.95508	130.2272724	288.6232303	348.7052112	349.3964159	124.9854416	328.9082858	-1.395919872	5.40E-15	5.02E-13	RGS14	7	38857589	38872628	+	3619	protein_coding	regulator of G protein signaling 14 [Source:VGNC Symbol;Acc:VGNC:33914]	RGS
ENSBTAG00000009868	2528.121697	2607.06279	2361.584119	1450.155743	1425.231183	1261.330794	2498.922869	1378.905906	0.857869969	5.60E-15	5.17E-13	VGF	25	35574908	35576764	+	1857	protein_coding	VGF nerve growth factor inducible [Source:VGNC Symbol;Acc:VGNC:36790]	-
novel.1439	160.3585415	189.9317217	161.3263225	387.1775041	409.5258875	469.1060514	170.5388619	421.936481	-1.307430953	6.07E-15	5.57E-13	-	5	113920047	113927756	+	4463	-	-	-
ENSBTAG00000017970	4582.096843	4637.33293	3960.269665	2424.636266	2205.763196	1825.815254	4393.233146	2152.071572	1.029626502	6.62E-15	6.04E-13	ZYX	4	106775572	106788374	+	2934	protein_coding	Bos taurus zyxin (ZYX), mRNA. [Source:RefSeq mRNA;Acc:NM_001078101]	LIM
ENSBTAG00000015595	881.9719782	887.6808886	790.1102424	390.1944717	451.0866831	351.342914	853.2543697	397.5413563	1.102188104	7.16E-15	6.50E-13	MCM5	5	73633313	73651860	+	2752	protein_coding	Bos taurus minichromosome maintenance complex component 5 (MCM5), mRNA. [Source:RefSeq mRNA;Acc:NM_001075290]	MCM
ENSBTAG00000009218	1889.657134	1849.335185	2099.185884	1006.661511	1110.991022	904.1483855	1946.059401	1007.266973	0.950332911	8.92E-15	8.04E-13	ANLN	4	60772368	60825953	-	3282	protein_coding	anillin actin binding protein [Source:VGNC Symbol;Acc:VGNC:25950]	PH
ENSBTAG00000006731	169.2673494	133.9518458	180.7632289	39.22057834	29.39666024	43.79620812	161.3274747	37.4711489	2.104946088	9.00E-15	8.08E-13	SLC7A5	18	13298147	13327247	-	4762	protein_coding	solute carrier family 7 member 5 [Source:VGNC Symbol;Acc:VGNC:52250]	-
ENSBTAG00000046324	173.2268195	200.9277687	214.777815	464.6130049	446.0182934	445.7480738	196.3108011	452.1264573	-1.20337207	9.86E-15	8.80E-13	-	5	100457856	100506412	-	790	protein_coding	-	Lectin_C
ENSBTAG00000020054	768.1372111	692.7509637	828.984055	382.1492248	350.7325671	376.6473898	763.2907433	369.8430606	1.045348742	1.02E-14	9.01E-13	TNFRSF21	23	20418222	20482057	-	3555	protein_coding	Bos taurus TNF receptor superfamily member 21 (TNFRSF21), mRNA. [Source:RefSeq mRNA;Acc:NM_001076911]	Death
ENSBTAG00000053135	283.1021165	277.900098	332.3710983	627.5292534	720.725015	617.03991	297.7911042	655.0980594	-1.137006444	1.04E-14	9.18E-13	TMEM236	13	32184990	32225378	+	3043	protein_coding	transmembrane protein 236 [Source:NCBI gene;Acc:520412]	-
ENSBTAG00000053399	1297.716345	1262.546129	1492.754406	2686.106788	2797.751113	3908.568263	1351.005627	3130.808721	-1.212529614	1.06E-14	9.32E-13	-	23	27507452	27514505	+	1227	lncRNA	-	-
ENSBTAG00000012784	2060.904218	2050.262953	2020.466413	1212.820961	1196.139969	1232.133322	2043.877862	1213.698084	0.751856453	1.10E-14	9.58E-13	RACGAP1	5	29851713	29890966	+	5841	protein_coding	Rac GTPase activating protein 1 [Source:VGNC Symbol;Acc:VGNC:33675]	RhoGAP
novel.523	4797.887967	4861.252434	5444.277463	8666.742157	8482.456997	9876.531556	5034.472621	9008.576903	-0.839461107	1.33E-14	1.15E-12	-	16	65827000	65831537	+	4538	-	-	-
novel.705	1197.739724	1132.592845	1139.002711	2316.025434	2145.956198	3050.162583	1156.445093	2504.048072	-1.114673602	1.35E-14	1.16E-12	-	19	14898599	14904257	+	2020	-	-	-
ENSBTAG00000019975	88.09821107	115.9583143	98.15637697	16.09049368	15.20516909	17.51848325	100.7376341	16.27138201	2.629222802	1.44E-14	1.24E-12	IL7R	20	38299694	38334389	-	3551	protein_coding	interleukin 7 receptor [Source:VGNC Symbol;Acc:VGNC:30170]	fn3
ENSBTAG00000011677	133.6321179	159.9425024	145.7767975	22.12442881	28.3829823	41.84970998	146.4504726	30.78570703	2.247430574	1.55E-14	1.33E-12	HIST1H1C	23	31876303	31878150	+	768	protein_coding	Histone H1.2 [Source:UniProtKB/Swiss-Prot;Acc:P02253]	-
ENSBTAG00000010384	276.1730437	308.8889579	246.8487104	60.33935129	95.28572631	96.35165787	277.3035706	83.99224515	1.722447413	1.87E-14	1.59E-12	CDC6	19	40524612	40546357	+	3441	protein_coding	cell division cycle 6 [Source:VGNC Symbol;Acc:VGNC:27081]	-
ENSBTAG00000012249	29.6960262	53.98059458	42.76119393	216.2160088	142.9285895	225.7937841	42.14593824	194.9794608	-2.210613964	2.00E-14	1.69E-12	PRR15L	19	38510736	38516493	+	1499	protein_coding	Bos taurus proline rich 15 like (PRR15L), mRNA. [Source:RefSeq mRNA;Acc:NM_001034794]	-
novel.1683	25.73655604	29.98921921	45.67672988	180.012398	134.8191659	154.746602	33.80083504	156.5260553	-2.20983927	2.11E-14	1.77E-12	-	8	112954876	112962018	+	3362	-	-	-
ENSBTAG00000008612	37.61496652	61.9777197	52.47964709	198.1142034	167.25686	210.221799	50.69077777	191.8642875	-1.920834091	2.31E-14	1.93E-12	C1R	5	103358822	103387417	+	2583	protein_coding	Bos taurus complement C1r (C1R), mRNA. [Source:RefSeq mRNA;Acc:NM_001034407]	Trypsin
ENSBTAG00000004944	448.4099957	422.8479908	459.6828347	924.1977305	828.1748765	1104.637694	443.6469404	952.3367669	-1.102199551	2.92E-14	2.42E-12	ANXA10	8	495871	571472	+	1410	protein_coding	Bos taurus annexin A10 (ANXA10), mRNA. [Source:RefSeq mRNA;Acc:NM_001192058]	-
ENSBTAG00000001598	997.7864804	1088.608657	1103.044434	1886.610384	1799.278343	1857.932473	1063.146524	1847.9404	-0.797566143	3.03E-14	2.51E-12	MAP7	9	74359538	74536882	-	4920	protein_coding	Bos taurus microtubule associated protein 7 (MAP7), mRNA. [Source:RefSeq mRNA;Acc:NM_001101874]	-
ENSBTAG00000001592	323.6866856	374.8652401	382.9070547	807.5416514	683.2189312	867.1649208	360.4863268	785.9751678	-1.124658413	3.21E-14	2.64E-12	INSIG1	4	117125786	117138560	+	3454	protein_coding	Bos taurus insulin induced gene 1 (INSIG1), mRNA. [Source:RefSeq mRNA;Acc:NM_001077909]	-
ENSBTAG00000007430	455.3390684	446.8393662	363.4701484	180.012398	179.4209953	149.8803567	421.882861	169.77125	1.31358968	3.59E-14	2.94E-12	MYBBP1A	19	25024913	25039465	-	4117	protein_coding	MYB binding protein 1a [Source:VGNC Symbol;Acc:VGNC:31777]	-
ENSBTAG00000011150	2109.407728	2098.245704	2147.77815	3392.077198	3527.599229	3871.584798	2118.477194	3597.087075	-0.763839641	3.61E-14	2.94E-12	PFN2	1	118213388	118220074	+	2029	protein_coding	Bos taurus profilin 2 (PFN2), mRNA. [Source:RefSeq mRNA;Acc:NM_001128197]	-
ENSBTAG00000018362	1131.418598	1141.589611	1097.213362	632.5575327	599.0836622	645.264133	1123.407191	625.6351093	0.844347055	4.01E-14	3.24E-12	TMEM109	29	37252089	37260864	+	1996	protein_coding	Bos taurus transmembrane protein 109 (TMEM109), mRNA. [Source:RefSeq mRNA;Acc:NM_001046470]	-
ENSBTAG00000015222	520.6703261	595.7858216	667.6577325	1179.634318	1141.40136	1327.511731	594.7046267	1216.182469	-1.032091576	4.21E-14	3.39E-12	RSRP1	2	127708588	127712696	+	2076	protein_coding	Bos taurus arginine and serine rich protein 1 (RSRP1), mRNA. [Source:RefSeq mRNA;Acc:NM_001103298]	-
ENSBTAG00000046337	1347.209722	1384.502287	1198.285275	587.3030192	537.2493079	727.0170548	1309.999095	617.189794	1.085382006	4.98E-14	3.99E-12	TUBB6	24	42799984	42808150	+	1675	protein_coding	Bos taurus tubulin beta 6 class V (TUBB6), mRNA. [Source:RefSeq mRNA;Acc:NM_001046373]	Tubulin
ENSBTAG00000011661	345.4637715	348.8745835	298.3565122	131.740917	134.8191659	138.2013679	330.898289	134.9204836	1.293981824	5.22E-14	4.16E-12	CEP152	10	61437230	61529573	+	5339	protein_coding	centrosomal protein 152 [Source:VGNC Symbol;Acc:VGNC:27194]	-
ENSBTAG00000000590	524.6297962	482.8264293	448.0206909	228.283879	191.5851306	151.8268548	485.1589721	190.5652881	1.348782624	7.40E-14	5.87E-12	POLE	17	44523016	44583195	+	7442	protein_coding	Bos taurus DNA polymerase epsilon, catalytic subunit (POLE), mRNA. [Source:RefSeq mRNA;Acc:NM_001191429]	DNA_pol_B_exo
ENSBTAG00000017846	2531.0913	2542.086148	2525.825978	4032.679978	4036.465555	4453.587741	2533.001142	4174.244425	-0.720711997	8.51E-14	6.72E-12	F11R	3	8464412	8488977	+	2797	protein_coding	Bos taurus F11 receptor (F11R), mRNA. [Source:RefSeq mRNA;Acc:NM_174095]	V-set
ENSBTAG00000017135	1056.188665	1147.587455	1291.582426	2214.454192	2251.378704	2963.543416	1165.119515	2476.458771	-1.087836168	9.01E-14	7.05E-12	CTSS	3	19981529	20004455	+	1684	protein_coding	Bos taurus cathepsin S (CTSS), mRNA. [Source:RefSeq mRNA;Acc:NM_001033615]	Peptidase_C1
ENSBTAG00000009570	628.565888	662.7617445	630.7276104	1522.562964	1495.174961	2853.566271	640.685081	1957.101399	-1.611168968	9.01E-14	7.05E-12	ANGPTL8	7	15656227	15660222	+	2977	protein_coding	angiopoietin like 8 [Source:VGNC Symbol;Acc:VGNC:25896]	-
ENSBTAG00000037703	2555.837989	2336.160176	2067.114988	1254.052851	1141.40136	920.6936196	2319.704384	1105.38261	1.069529869	9.52E-14	7.38E-12	MICALL1	5	109709317	109737117	+	4620	protein_coding	Bos taurus MICAL like 1 (MICALL1), mRNA. [Source:RefSeq mRNA;Acc:NM_001193066]	CH
ENSBTAG00000011733	581.052246	622.7761189	704.5878545	1306.346955	1141.40136	1238.946065	636.1387398	1228.898127	-0.949846623	9.53E-14	7.38E-12	GIPC2	3	66535129	66637864	-	4679	protein_coding	GIPC PDZ domain containing family member 2 [Source:VGNC Symbol;Acc:VGNC:29366]	PDZ
ENSBTAG00000008756	2310.350839	2315.167723	2070.030524	3736.011501	3639.103803	3905.648515	2231.849695	3760.254606	-0.752665343	1.00E-13	7.74E-12	ELF3	16	80502933	80507964	-	2706	protein_coding	E74 like ETS transcription factor 3 [Source:VGNC Symbol;Acc:VGNC:28428]	Ets
ENSBTAG00000004906	671.1301922	631.7728847	679.3198763	302.7024123	300.0486701	360.1021557	660.7409844	320.9510793	1.041332347	1.01E-13	7.74E-12	CCNE2	14	69448183	69460811	+	2628	protein_coding	Bos taurus cyclin E2 (CCNE2), mRNA. [Source:RefSeq mRNA;Acc:NM_001015665]	Cyclin_C
ENSBTAG00000018823	2904.271363	2846.976544	2687.1523	4701.441121	4558.509694	4435.096009	2812.800069	4565.015608	-0.698622168	1.01E-13	7.74E-12	GRN	19	44149003	44156201	+	2689	protein_coding	granulin precursor [Source:VGNC Symbol;Acc:VGNC:29663]	-
ENSBTAG00000004322	2376.671964	2174.218393	2206.088869	1290.256462	1203.235714	1374.227686	2252.326408	1289.239954	0.804778395	1.03E-13	7.85E-12	FOS	10	86488645	86492108	+	2130	protein_coding	Fos proto-oncogene, AP-1 transcription factor subunit [Source:VGNC Symbol;Acc:VGNC:29073]	bZIP_1
ENSBTAG00000016406	776.0561514	886.6812479	949.4928743	387.1775041	448.0456492	442.8283266	870.7434246	426.01716	1.031328739	1.04E-13	7.87E-12	MCM10	13	27854518	27891168	+	4587	protein_coding	minichromosome maintenance 10 replication initiation factor [Source:VGNC Symbol;Acc:VGNC:31307]	-
ENSBTAG00000006240	375.1597977	321.8842862	414.9779502	788.4341902	723.7660488	809.7432257	370.6740113	773.9811549	-1.061947447	1.12E-13	8.46E-12	TLR4	8	107057826	107068836	+	3716	protein_coding	Bos taurus toll like receptor 4 (TLR4), mRNA. [Source:RefSeq mRNA;Acc:NM_174198]	TIR
ENSBTAG00000024449	4203.967443	4205.488174	4126.455214	2595.597761	2609.207016	2306.600294	4178.636944	2503.801691	0.738984248	1.15E-13	8.60E-12	CENPF	16	68929292	68991907	-	10722	protein_coding	centromere protein F [Source:VGNC Symbol;Acc:VGNC:27176]	-
ENSBTAG00000010276	369.2205925	404.8544593	376.1041375	158.8936251	150.024335	96.35165787	383.3930631	135.0898727	1.505996819	1.19E-13	8.85E-12	RECQL4	14	428460	434942	+	3893	pseudogene	RecQ like helicase 4 [Source:VGNC Symbol;Acc:VGNC:33849]	DEAD
novel.1118	85.12860845	97.96478275	60.25440963	253.4252754	245.3100613	249.1517618	81.11593361	249.2956995	-1.620836182	1.21E-13	8.95E-12	-	25	34525194	34535670	-	4936	-	PF00665:Integrase core domain|PF02093:Gag P30 core shell protein|PF01140:Matrix protein (MA), p15|PF18697:Murine leukemia virus (MLV) integrase (IN) C-terminal domain	Gag_p30
ENSBTAG00000011127	1400.662569	1469.471741	1594.798164	869.8923144	813.9833854	825.3152108	1488.310825	836.3969702	0.831480943	1.41E-13	1.04E-11	NUP205	4	99335497	99461007	+	7213	protein_coding	Bos taurus nucleoporin 205 (NUP205), mRNA. [Source:RefSeq mRNA;Acc:NM_001130931]	-
novel.813	30.68589374	31.98850049	40.8175033	133.7522287	128.7370983	151.8268548	34.49729918	138.1053939	-2.000642539	1.42E-13	1.05E-11	-	2	118340809	118350020	+	3178	-	-	-
ENSBTAG00000005408	1711.480977	1768.364293	2005.888733	3376.99236	3170.784595	4046.76963	1828.578001	3531.515528	-0.949584289	1.44E-13	1.06E-11	CLK1	2	89504933	89512321	-	1995	protein_coding	CDC like kinase 1 [Source:VGNC Symbol;Acc:VGNC:27448]	Pkinase
ENSBTAG00000016709	703.795821	756.7279647	795.9413143	1357.635404	1346.164304	1625.325946	752.1550333	1443.041884	-0.940094272	1.53E-13	1.11E-11	NT5C3A	4	63788270	63807500	+	1749	protein_coding	Bos taurus 5'-nucleotidase, cytosolic IIIA (NT5C3A), mRNA. [Source:RefSeq mRNA;Acc:NM_001037597]	-
ENSBTAG00000006769	7205.245824	7185.416922	6783.48031	4512.37782	4485.524882	4476.945719	7058.047685	4491.616141	0.652025583	1.64E-13	1.19E-11	HSD3B1	3	23706733	23717051	-	2316	protein_coding	hydroxy-delta-5-steroid dehydrogenase, 3 beta- and steroid delta-isomerase 1 [Source:NCBI gene;Acc:281824]	-
ENSBTAG00000021187	519.6804585	515.8145704	522.8527803	915.1468279	944.7478396	1075.440222	519.4492697	978.444963	-0.913653312	2.04E-13	1.47E-11	ID2	11	88604880	88607401	-	1396	protein_coding	inhibitor of DNA binding 2 [Source:NCBI gene;Acc:505025]	HLH
ENSBTAG00000020053	1534.294687	1487.465273	1609.375844	837.711327	933.5973822	881.7636569	1543.711935	884.3574554	0.803776648	2.18E-13	1.56E-11	ZEB1	13	33771235	33968002	-	5302	protein_coding	Bos taurus zinc finger E-box binding homeobox 1 (ZEB1), mRNA. [Source:RefSeq mRNA;Acc:NM_001206590]	-
ENSBTAG00000003842	1277.918994	1352.513786	1313.934868	689.8799164	752.1490311	781.5190027	1314.789216	741.1826501	0.826805365	2.29E-13	1.64E-11	-	25	28224570	28275671	+	4160	protein_coding	-	VPS9
ENSBTAG00000012451	383.078738	356.8717086	371.2449109	725.0778713	770.395234	1026.777768	370.3984525	840.7502912	-1.18282183	2.32E-13	1.65E-11	BOLA-DMB	23	7246582	7253835	-	1996	protein_coding	major histocompatibility complex, class II, DM beta [Source:NCBI gene;Acc:282491]	C1-set
ENSBTAG00000009506	2838.940105	2810.989481	2975.790359	4712.503336	4830.175382	5747.035755	2875.239982	5096.571491	-0.825876684	2.39E-13	1.69E-11	NAGA	5	113024569	113032754	-	1921	protein_coding	alpha-N-acetylgalactosaminidase [Source:VGNC Symbol;Acc:VGNC:31867]	-
ENSBTAG00000019853	2561.777194	2769.004574	2646.334797	1533.625179	1553.968281	1252.571552	2659.038855	1446.721671	0.878264925	2.44E-13	1.72E-11	SMURF2	19	48732717	48876849	-	2605	protein_coding	SMAD specific E3 ubiquitin protein ligase 2 [Source:VGNC Symbol;Acc:VGNC:35041]	HECT
ENSBTAG00000015692	299.9298646	335.8792551	337.2303248	124.701326	149.0106571	113.8701411	324.3464815	129.1940414	1.328744369	2.83E-13	1.98E-11	HSPA4L	17	29817687	29876207	-	3511	protein_coding	heat shock protein family A (Hsp70) member 4 like [Source:VGNC Symbol;Acc:VGNC:53906]	HSP70
ENSBTAG00000005793	315.7677453	277.900098	243.9331745	83.46943595	115.5592851	94.40515973	279.2003392	97.81129359	1.513457738	2.98E-13	2.09E-11	PEA15	3	9460717	9471684	-	2538	protein_coding	Bos taurus proliferation and apoptosis adaptor protein 15 (PEA15), mRNA. [Source:RefSeq mRNA;Acc:NM_001075456]	-
ENSBTAG00000021125	965.1208516	1033.628422	984.4793057	565.1785904	553.4681549	558.6449658	994.4095264	559.0972371	0.830705561	3.08E-13	2.14E-11	NUP160	15	77526748	77570322	-	5097	protein_coding	Bos taurus nucleoporin 160 (NUP160), mRNA. [Source:RefSeq mRNA;Acc:NM_001105630]	-
ENSBTAG00000009426	937.4045605	881.6830447	927.140432	527.9693238	478.4559874	496.3570254	915.4093457	500.9274455	0.869841414	3.09E-13	2.14E-11	EZH2	4	112024328	112069782	-	2945	protein_coding	Bos taurus enhancer of zeste 2 polycomb repressive complex 2 subunit (EZH2), mRNA. [Source:RefSeq mRNA;Acc:NM_001193024]	SET
ENSBTAG00000039657	84.13874091	107.9611892	82.60685191	14.07918197	1.013677939	9.732490694	91.56892732	8.275116867	3.464454366	3.16E-13	2.18E-11	HIST1H2AC	23	31818805	31828988	-	722	protein_coding	Bos taurus histone cluster 1, H2ac (HIST1H2AC), transcript variant 1, mRNA. [Source:RefSeq mRNA;Acc:NM_001205596]	Histone
ENSBTAG00000007102	1183.881578	1210.564815	1241.046469	726.0835272	643.6854916	683.2208467	1211.830954	684.3299551	0.824413187	3.43E-13	2.36E-11	GTSE1	5	116612064	116631552	+	3665	protein_coding	G2 and S-phase expressed 1 [Source:VGNC Symbol;Acc:VGNC:29711]	-
ENSBTAG00000001105	5275.004121	5337.081379	5739.71844	8853.794146	8629.440299	9979.695957	5450.601313	9154.310134	-0.748045885	3.55E-13	2.43E-11	ANXA4	11	68096833	68171538	+	2056	protein_coding	Bos taurus annexin A4 (ANXA4), mRNA. [Source:RefSeq mRNA;Acc:NM_001001440]	-
ENSBTAG00000030974	1040.350785	944.6604051	965.0423993	426.3980824	399.3891081	553.7787205	983.3511964	459.8553037	1.096054795	3.62E-13	2.47E-11	TUBA4A	2	107196605	107203963	-	2014	protein_coding	tubulin alpha 4a [Source:VGNC Symbol;Acc:VGNC:49986]	Tubulin
ENSBTAG00000002224	408.8152941	386.8609278	387.7662813	193.0859241	163.2021483	140.147866	394.4808344	165.4786461	1.253912633	3.69E-13	2.51E-11	UHRF1	7	19223877	19257053	-	3899	protein_coding	Bos taurus ubiquitin like with PHD and ring finger domains 1 (UHRF1), mRNA. [Source:RefSeq mRNA;Acc:NM_001103098]	ubiquitin
ENSBTAG00000017465	5057.233262	5326.085332	5638.646527	8529.97296	8341.555764	8814.716821	5340.65504	8562.081848	-0.680940752	4.03E-13	2.73E-11	GNS	5	49053812	49103597	+	4416	protein_coding	Bos taurus glucosamine (N-acetyl)-6-sulfatase (GNS), mRNA. [Source:RefSeq mRNA;Acc:NM_001075562]	Sulfatase
ENSBTAG00000012443	1386.804424	1371.506958	1476.233036	811.5642748	838.3116559	830.1814562	1411.514806	826.6857956	0.771878813	4.59E-13	3.09E-11	DIAPH3	12	2180988	2743479	+	3546	protein_coding	diaphanous related formin 3 [Source:VGNC Symbol;Acc:VGNC:28062]	FH2
ENSBTAG00000010885	863.164495	883.682326	806.6316127	461.5960373	468.319208	469.1060514	851.1594779	466.3404323	0.867955532	4.72E-13	3.15E-11	TSPYL1	9	34430224	34433482	+	3259	protein_coding	Bos taurus TSPY like 1 (TSPYL1), mRNA. [Source:RefSeq mRNA;Acc:NM_001076111]	-
ENSBTAG00000010693	9524.505471	9490.588239	9308.334442	6081.200954	5716.129901	5066.734655	9441.142717	5621.35517	0.748078238	4.73E-13	3.15E-11	LMO7	12	50677082	50897222	+	6655	protein_coding	LIM domain 7 [Source:VGNC Symbol;Acc:VGNC:30937]	CH
ENSBTAG00000017715	989.8675401	1019.633453	945.605493	1669.388719	1775.96375	2128.495715	985.0354954	1857.949395	-0.915622688	5.75E-13	3.82E-11	HOMER2	21	23113622	23204335	-	3558	protein_coding	Bos taurus homer scaffold protein 2 (HOMER2), mRNA. [Source:RefSeq mRNA;Acc:NM_001075467]	-
ENSBTAG00000017446	284.091984	331.8806926	310.9905013	122.6900143	116.572963	72.9936802	308.987726	104.0855525	1.571066356	5.97E-13	3.95E-11	E2F8	29	25699093	25717254	+	3394	protein_coding	E2F transcription factor 8 [Source:VGNC Symbol;Acc:VGNC:28292]	E2F_TDP
ENSBTAG00000011969	1908.464617	1771.363215	1244.933851	580.2634282	547.3860873	796.1177388	1641.587227	641.2557514	1.355800255	6.09E-13	4.01E-11	HSPB1	25	34345339	34347009	+	855	protein_coding	Bos taurus heat shock protein family B (small) member 1 (HSPB1), mRNA. [Source:RefSeq mRNA;Acc:NM_001025569]	-
novel.155	408.8152941	374.8652401	429.5556299	750.2192677	749.1079973	785.411999	404.4120547	761.5797546	-0.91305568	6.51E-13	4.27E-11	-	10	69613371	69616415	-	3045	-	-	-
ENSBTAG00000017753	11489.39254	11351.91911	11238.41924	17043.85543	17030.80306	17835.76245	11359.9103	17303.47364	-0.607117865	7.52E-13	4.91E-11	APP	1	10231296	10543984	+	3870	protein_coding	amyloid beta precursor protein [Source:VGNC Symbol;Acc:VGNC:26038]	Kunitz_BPTI
novel.763	799.8129724	798.7128716	818.2937565	1360.652372	1473.887724	1750.875076	805.6065335	1528.471724	-0.924059447	7.60E-13	4.95E-11	-	19	14036578	14051881	-	3858	-	-	-
ENSBTAG00000018423	4754.333795	4669.321431	4720.252703	2913.385011	2924.460855	3129.969007	4714.635976	2989.271625	0.657309741	8.23E-13	5.33E-11	DDX5	19	48678120	48691777	-	3931	protein_coding	Bos taurus DEAD-box helicase 5 (DDX5), mRNA. [Source:RefSeq mRNA;Acc:NM_001191395]	DEAD
ENSBTAG00000008181	444.4505255	425.8469128	406.2313423	200.1255151	165.2295041	208.2753008	425.5095935	191.2101067	1.153482223	8.46E-13	5.46E-11	CHAF1A	7	19676722	19701793	-	3976	protein_coding	chromatin assembly factor 1 subunit A [Source:VGNC Symbol;Acc:VGNC:27266]	-
ENSBTAG00000020638	1495.689853	1457.476054	1415.978626	894.0280549	826.1475207	765.9470176	1456.381511	828.7075311	0.813582134	8.62E-13	5.54E-11	TIMP3	5	71388890	71459269	+	1573	protein_coding	TIMP metallopeptidase inhibitor 3 [Source:VGNC Symbol;Acc:VGNC:35872]	-
ENSBTAG00000011905	2601.371895	2620.058118	2687.1523	1623.12855	1538.763112	1692.480132	2636.194105	1618.123931	0.704066601	8.91E-13	5.71E-11	RRAS2	15	38367194	38444339	+	1738	protein_coding	Bos taurus RAS related 2 (RRAS2), mRNA. [Source:RefSeq mRNA;Acc:NM_001099010]	Ras
ENSBTAG00000005111	895.8301238	773.7218556	860.0831052	423.3811149	376.0745155	469.1060514	843.2116948	422.8538939	0.995439112	8.98E-13	5.73E-11	BMP2	13	49151441	49185579	+	4067	protein_coding	bone morphogenetic protein 2 [Source:VGNC Symbol;Acc:VGNC:26517]	TGFb_propeptide
ENSBTAG00000045751	810.7015153	794.714309	838.7025082	1727.716759	1710.074684	1325.565232	814.7061109	1587.785558	-0.962489688	1.00E-12	6.33E-11	-	NKLS02000910.1	1512	147533	+	3632	protein_coding	-	ABC_membrane
ENSBTAG00000016217	153.4294687	179.9353153	155.4952506	375.1096338	341.6094656	408.7646091	162.9533449	375.1612362	-1.203543065	1.00E-12	6.33E-11	RBM43	2	44857602	44869106	+	2695	protein_coding	Bos taurus RNA binding motif protein 43 (RBM43), mRNA. [Source:RefSeq mRNA;Acc:NM_001099168]	-
ENSBTAG00000002918	934.4349578	937.6629206	901.8724538	477.686531	377.0881935	510.9557614	924.6567774	455.2434953	1.021892158	1.11E-12	6.99E-11	RAD51	10	36255232	36291194	+	2802	protein_coding	Bos taurus RAD51 recombinase (RAD51), mRNA. [Source:RefSeq mRNA;Acc:NM_001046179]	-
ENSBTAG00000002492	161.348409	187.9324404	182.7069195	429.41505	381.1429052	373.7276426	177.3292563	394.761866	-1.154454997	1.12E-12	7.02E-11	SYCP3	5	65541083	65548189	-	1174	protein_coding	Bos taurus synaptonemal complex protein 3 (SYCP3), mRNA. [Source:RefSeq mRNA;Acc:NM_001040588]	-
ENSBTAG00000002298	908.6984018	953.6571708	852.3083426	508.8618625	461.2234625	506.0895161	904.8879718	492.0582804	0.878708715	1.12E-12	7.02E-11	CKAP2L	11	46451747	46473972	-	3226	protein_coding	Bos taurus cytoskeleton associated protein 2 like (CKAP2L), mRNA. [Source:RefSeq mRNA;Acc:NM_001098901]	-
ENSBTAG00000047133	138.5814556	143.9482522	151.6078694	325.832497	334.51372	459.3735607	144.7125257	373.2399259	-1.367242071	1.34E-12	8.32E-11	-	2	118309402	118313769	+	576	protein_coding	-	Bromodomain
ENSBTAG00000052518	2427.155208	2442.122084	2114.735409	1056.944303	1123.155157	1397.585664	2328.004234	1192.561708	0.964816786	1.41E-12	8.75E-11	TUBB4B	11	106254513	106259949	+	4563	protein_coding	tubulin beta 4B class IVb [Source:NCBI gene;Acc:539149]	Tubulin
ENSBTAG00000002490	597.8799942	560.7983992	655.0237434	1055.938648	1092.744819	1217.534586	604.5673789	1122.072684	-0.892157178	1.48E-12	9.12E-11	CHPT1	5	65511775	65543424	+	1549	protein_coding	Bos taurus choline phosphotransferase 1 (CHPT1), mRNA. [Source:RefSeq mRNA;Acc:NM_001075507]	CDP-OH_P_transf
novel.1507	173.2268195	186.9327997	212.8341243	442.4885761	418.648989	395.1391222	190.9979145	418.7588958	-1.132151479	1.50E-12	9.24E-11	-	6	59183421	59193287	+	9867	-	-	-
ENSBTAG00000012519	6444.037686	6688.595524	6614.379225	4022.623419	4326.377446	3679.854731	6582.337478	4009.618532	0.715187452	1.63E-12	9.97E-11	XDH	11	14164544	14269931	-	6682	protein_coding	Bos taurus xanthine dehydrogenase (XDH), mRNA. [Source:RefSeq mRNA;Acc:NM_173972]	Fer2
ENSBTAG00000015749	780.0156216	758.727246	909.6472163	1510.495094	1393.807167	1553.305515	816.130028	1485.869258	-0.864350202	1.65E-12	1.01E-10	STEAP1	4	74355342	74368429	+	1449	protein_coding	STEAP family member 1 [Source:NCBI gene;Acc:515156]	Ferric_reduct
ENSBTAG00000007101	2228.191833	2204.207612	2158.468448	956.3787179	968.0624322	1331.404727	2196.955964	1085.281959	1.017191337	1.72E-12	1.04E-10	F3	3	48954585	48965477	+	1886	protein_coding	Bos taurus coagulation factor III, tissue factor (F3), mRNA. [Source:RefSeq mRNA;Acc:NM_173878]	-
ENSBTAG00000020444	842.3772766	795.7139497	698.7567826	389.1888158	384.1839391	280.295732	778.9493363	351.2228289	1.149574469	1.87E-12	1.13E-10	MAST2	3	100071214	100278380	-	7235	protein_coding	microtubule associated serine/threonine kinase 2 [Source:VGNC Symbol;Acc:VGNC:31258]	Pkinase
ENSBTAG00000022613	247.466885	197.9288468	204.0875165	67.37894227	22.30091467	51.58220068	216.4944161	47.08735254	2.199965308	2.01E-12	1.21E-10	CYCS	4	70735436	70738238	+	971	protein_coding	Bos taurus cytochrome c, somatic (CYCS), mRNA. [Source:RefSeq mRNA;Acc:NM_001046061]	-
ENSBTAG00000010645	829.5089986	764.7250898	730.8276781	1376.742865	1298.52144	1535.787031	775.0205888	1403.683779	-0.857082033	2.13E-12	1.28E-10	BOLA-DRA	23	25837353	25843155	-	2368	protein_coding	major histocompatibility complex, class II, DR alpha [Source:NCBI gene;Acc:506214]	C1-set
ENSBTAG00000039028	38.60483406	38.98598497	34.9864314	134.7578845	119.6139969	166.4255909	37.52575014	140.2658241	-1.903108021	2.41E-12	1.44E-10	PI3	13	73547863	73555170	+	920	protein_coding	peptidase inhibitor 3, skin-derived (SKALP) [Source:NCBI gene;Acc:783871]	-
ENSBTAG00000021452	1704.551904	1616.418915	1625.897215	3924.069145	3720.198038	2633.611982	1648.956011	3425.959722	-1.054885777	2.78E-12	1.66E-10	TRANK1	22	10591437	10687507	+	9934	protein_coding	tetratricopeptide repeat and ankyrin repeat containing 1 [Source:VGNC Symbol;Acc:VGNC:36282]	-
ENSBTAG00000012861	921.5666798	987.6449526	994.1977588	576.2408048	516.9757491	479.8117912	967.8031304	524.3427817	0.884418651	2.88E-12	1.71E-10	KIF4A	X	80023333	80153340	-	4097	protein_coding	Bos taurus kinesin family member 4A (KIF4A), mRNA. [Source:RefSeq mRNA;Acc:NM_001206105]	Kinesin
ENSBTAG00000017492	2322.229249	2445.121006	2367.415191	3797.356508	3600.584041	3960.150463	2378.255149	3786.030337	-0.670829406	3.25E-12	1.93E-10	PCMTD1	14	21013842	21062048	-	3596	protein_coding	Bos taurus protein-L-isoaspartate (D-aspartate) O-methyltransferase domain containing 1 (PCMTD1), mRNA. [Source:RefSeq mRNA;Acc:NM_001081526]	-
ENSBTAG00000003418	7503.195954	7558.282881	6816.52305	4723.56555	4623.385082	4457.480738	7292.667295	4601.477123	0.664350621	3.37E-12	1.98E-10	MSN	X	94696646	94769333	-	3964	protein_coding	Bos taurus moesin (MSN), mRNA. [Source:RefSeq mRNA;Acc:NM_001046477]	Band_41
ENSBTAG00000000804	711.7147613	663.7613852	703.6160092	1173.600383	1225.536629	1151.353649	693.0307186	1183.496887	-0.771957364	3.37E-12	1.98E-10	MOB3B	8	16757261	16972790	+	2566	protein_coding	Bos taurus MOB kinase activator 3B (MOB3B), mRNA. [Source:RefSeq mRNA;Acc:NM_001046491]	-
ENSBTAG00000019120	539.4778093	580.791212	661.8266606	279.5723276	276.7340775	314.3594494	594.031894	290.2219515	1.033203262	3.66E-12	2.15E-10	WDHD1	10	67450966	67504493	-	4093	protein_coding	Bos taurus WD repeat and HMG-box DNA binding protein 1 (WDHD1), mRNA. [Source:RefSeq mRNA;Acc:NM_001192766]	WD40
ENSBTAG00000010576	689.9376754	730.7373081	661.8266606	341.9229906	332.4863641	398.0588694	694.1672147	357.489408	0.956912339	3.69E-12	2.15E-10	MAP2K3	19	35255751	35273731	+	3100	protein_coding	mitogen-activated protein kinase kinase 3 [Source:VGNC Symbol;Acc:VGNC:31184]	Pkinase
ENSBTAG00000040065	576.1029083	565.7966024	714.3063077	258.4535547	234.159604	321.1721929	618.7352728	271.2617839	1.189212776	4.15E-12	2.41E-10	RAD51AP1	5	105578163	105595893	-	2090	protein_coding	Bos taurus RAD51 associated protein 1 (RAD51AP1), mRNA. [Source:RefSeq mRNA;Acc:NM_001076403]	-
ENSBTAG00000004636	2862.696926	2827.983371	3270.25949	4956.877708	4784.559874	4910.041555	2986.979929	4883.826379	-0.709281838	4.57E-12	2.65E-10	PLEKHA1	26	42206907	42261348	+	3524	protein_coding	Bos taurus pleckstrin homology domain containing A1 (PLEKHA1), mRNA. [Source:RefSeq mRNA;Acc:NM_001075593]	PH
ENSBTAG00000003074	920.5768123	867.6880758	833.8432816	494.7826806	499.7432242	436.9888322	874.0360566	477.171579	0.873408621	4.78E-12	2.76E-10	SLC16A6	19	61867803	61877805	+	1896	protein_coding	Bos taurus solute carrier family 16 member 6 (SLC16A6), mRNA. [Source:RefSeq mRNA;Acc:NM_001192672]	MFS_1
ENSBTAG00000016444	538.4879418	477.8282261	496.6129568	891.0110873	915.3511793	881.7636569	504.3097082	896.0419745	-0.829198442	5.04E-12	2.90E-10	RETREG1	20	56526791	56683260	+	1987	protein_coding	Bos taurus reticulophagy regulator 1 (RETREG1), mRNA. [Source:RefSeq mRNA;Acc:NM_001015672]	-
ENSBTAG00000009080	310.8184076	365.8684743	397.4847345	719.0439362	756.2037428	668.6221107	358.0572055	714.6232632	-0.996721009	5.05E-12	2.90E-10	ITGB6	2	36097616	36247251	+	3742	protein_coding	integrin subunit beta 6 [Source:VGNC Symbol;Acc:VGNC:30331]	-
ENSBTAG00000015182	538.4879418	595.7858216	503.415874	1056.944303	1112.0047	1632.138689	545.8965458	1267.029231	-1.215018499	5.14E-12	2.93E-10	STARD10	15	52302299	52329988	-	1627	protein_coding	Bos taurus StAR related lipid transfer domain containing 10 (STARD10), mRNA. [Source:RefSeq mRNA;Acc:NM_001192379]	START
ENSBTAG00000004136	788.9244295	871.6866383	862.9986411	1383.782456	1406.98498	1512.429054	841.2032363	1434.39883	-0.769986234	5.69E-12	3.24E-10	NFE2L3	4	69748359	69782790	-	2913	protein_coding	Bos taurus nuclear factor, erythroid 2 like 3 (NFE2L3), mRNA. [Source:RefSeq mRNA;Acc:NM_001077899]	bZIP_Maf
ENSBTAG00000017391	73.25019797	69.97484482	72.88839874	10.05655855	13.17781321	5.839494416	72.03781384	9.691288726	2.898607319	6.02E-12	3.41E-10	HS3ST2	25	20473436	20590833	+	2388	protein_coding	heparan sulfate-glucosamine 3-sulfotransferase 2 [Source:VGNC Symbol;Acc:VGNC:29959]	Sulfotransfer_1
ENSBTAG00000007893	801.7927075	721.7405423	791.0820877	1282.211215	1387.725099	1610.72721	771.5384458	1426.887841	-0.887133528	6.20E-12	3.51E-10	SCPEP1	19	7813172	7847068	+	2135	protein_coding	Bos taurus serine carboxypeptidase 1 (SCPEP1), mRNA. [Source:RefSeq mRNA;Acc:NM_001045909]	Peptidase_S10
ENSBTAG00000012330	5281.933194	6283.741065	7659.11294	12134.24354	15073.39096	21870.85309	6408.2624	16359.49586	-1.352125585	6.45E-12	3.63E-10	B2M	10	103116503	103123174	+	1357	protein_coding	beta-2-microglobulin [Source:NCBI gene;Acc:280729]	C1-set
ENSBTAG00000040034	1935.191041	1744.372917	1868.858544	2948.582966	3116.045986	2896.38923	1849.474167	2987.006061	-0.691529236	6.51E-12	3.65E-10	-	8	62476008	62522597	+	5376	protein_coding	-	-
ENSBTAG00000006551	731.5121121	754.7286834	909.6472163	394.2170951	354.7872788	434.0690849	798.6293373	394.3578196	1.017840173	6.66E-12	3.72E-10	ESCO2	8	10992674	11019066	-	2972	protein_coding	Bos taurus establishment of sister chromatid cohesion N-acetyltransferase 2 (ESCO2), mRNA. [Source:RefSeq mRNA;Acc:NM_001101182]	-
novel.1163	304.8792023	206.9256125	211.862279	606.4104804	543.3313756	543.0729807	241.2223646	564.2716122	-1.226057222	6.88E-12	3.83E-10	-	26	37717427	37819416	-	9707	-	-	-
ENSBTAG00000018775	1860.950975	1866.329075	1793.054609	1163.543824	1151.538139	1068.627478	1840.111553	1127.903147	0.706231053	7.28E-12	4.04E-10	TPX2	13	61285805	61340092	+	3162	protein_coding	Bos taurus TPX2, microtubule nucleation factor (TPX2), mRNA. [Source:RefSeq mRNA;Acc:NM_001098898]	-
ENSBTAG00000016931	173.2268195	167.9396276	161.3263225	65.36763056	41.56079552	38.92996278	167.4975899	48.61946295	1.785426686	7.30E-12	4.04E-10	E2F7	5	6443192	6482529	-	4534	protein_coding	E2F transcription factor 7 [Source:VGNC Symbol;Acc:VGNC:28291]	E2F_TDP
ENSBTAG00000020495	657.2720466	754.7286834	651.1363621	1271.149	1165.72963	1459.873604	687.712364	1298.917412	-0.917675572	7.34E-12	4.05E-10	SH3YL1	8	112764036	112825612	+	1730	protein_coding	Bos taurus SH3 and SYLF domain containing 1 (SH3YL1), mRNA. [Source:RefSeq mRNA;Acc:NM_001034607]	SH3_1
ENSBTAG00000007952	1299.69608	1239.554394	1273.117365	2128.973445	2258.474449	2896.38923	1270.78928	2427.945708	-0.934105901	7.41E-12	4.07E-10	MVP	25	26403797	26423373	-	2860	protein_coding	Bos taurus major vault protein (MVP), mRNA. [Source:RefSeq mRNA;Acc:NM_001035317]	-
ENSBTAG00000048114	2426.165341	2270.183894	1908.704202	1128.345869	1174.852732	1295.394511	2201.684479	1199.531037	0.875994025	7.51E-12	4.10E-10	-	9	87531057	87535158	+	1387	protein_coding	retinoic acid early transcript 1E-like [Source:NCBI gene;Acc:100848331]	MHC_I
ENSBTAG00000012083	536.5082067	506.8178046	462.5983707	224.2612556	270.6520098	209.2485499	501.974794	234.7206051	1.097082729	7.52E-12	4.10E-10	IRX3	18	22615235	22618354	-	2398	protein_coding	iroquois homeobox 3 [Source:VGNC Symbol;Acc:VGNC:30287]	Coprinus_mating
ENSBTAG00000020538	313.7880102	290.8954263	388.7381266	765.3041055	626.4529666	718.2578132	331.1405211	703.3382951	-1.086505337	7.73E-12	4.21E-10	HERC5	6	36257293	36302174	-	3286	protein_coding	Bos taurus HECT and RLD domain containing E3 ubiquitin protein ligase 5 (HERC5), mRNA. [Source:RefSeq mRNA;Acc:NM_001101995]	HECT
ENSBTAG00000003994	1917.373425	1893.319373	1958.268313	1230.922766	1207.290426	1144.540906	1922.987037	1194.251366	0.687337068	8.33E-12	4.51E-10	IGFBP3	4	76116349	76124835	+	2466	protein_coding	Bos taurus insulin like growth factor binding protein 3 (IGFBP3), mRNA. [Source:RefSeq mRNA;Acc:NM_174556]	-
ENSBTAG00000012278	1197.739724	1071.614766	1088.466755	1846.384149	1910.782916	1801.484027	1119.273748	1852.883698	-0.727176292	8.41E-12	4.54E-10	MTMR12	20	41323015	41391311	+	4259	protein_coding	myotubularin related protein 12 [Source:VGNC Symbol;Acc:VGNC:31739]	-
ENSBTAG00000020100	1348.19959	1271.542894	1484.979644	689.8799164	805.8739619	785.411999	1368.240709	760.3886257	0.847552894	8.43E-12	4.54E-10	-	10	30064006	30087255	-	5458	protein_coding	Rho GTPase activating protein 11A [Source:NCBI gene;Acc:617811]	RhoGAP
ENSBTAG00000015536	2641.956464	2675.038353	2948.57869	4522.434379	4271.638837	4370.861571	2755.191169	4388.311595	-0.671476504	8.75E-12	4.69E-10	CPNE3	14	76118257	76165972	-	4194	protein_coding	copine 3 [Source:VGNC Symbol;Acc:VGNC:27660]	C2
ENSBTAG00000047739	1308.604888	1393.499053	1329.484393	2440.72676	2253.406059	3160.139728	1343.862778	2618.090849	-0.962244609	8.96E-12	4.79E-10	TSC22D1	12	14678207	14681664	-	1887	protein_coding	Bos taurus TSC22 domain family member 1 (TSC22D1), mRNA. [Source:RefSeq mRNA;Acc:NM_001034377]	-
ENSBTAG00000013755	1244.263498	1340.518099	1204.116347	2040.475729	2242.255602	2635.55848	1262.965981	2306.096604	-0.868771281	9.14E-12	4.87E-10	ITGB5	1	69196881	69312128	-	3421	protein_coding	Bos taurus integrin subunit beta 5 (ITGB5), mRNA. [Source:RefSeq mRNA;Acc:NM_174679]	-
ENSBTAG00000001785	119.7739724	137.9504084	135.086499	22.12442881	31.42401612	42.82295905	130.9369599	32.12380133	2.02497223	9.31E-12	4.94E-10	TGM3	13	52793538	52836265	-	2917	protein_coding	Bos taurus transglutaminase 3 (TGM3), mRNA. [Source:RefSeq mRNA;Acc:NM_001101848]	Transglut_core
ENSBTAG00000019588	166.2977467	128.9536426	134.1146537	306.7250357	359.8556685	458.4003117	143.1220143	374.993672	-1.389984526	1.02E-11	5.42E-10	BLA-DQB	23	25672686	25680506	+	1185	protein_coding	Bos taurus MHC class II antigen (BLA-DQB), mRNA. [Source:RefSeq mRNA;Acc:NM_001034668]	C1-set
ENSBTAG00000020595	966.1107191	969.6514211	990.3103776	1569.828789	1563.091383	1754.768072	975.3575059	1629.229415	-0.740267899	1.06E-11	5.57E-10	KCTD20	23	10377039	10413105	+	4900	protein_coding	Bos taurus potassium channel tetramerization domain containing 20 (KCTD20), mRNA. [Source:RefSeq mRNA;Acc:NM_001101093]	-
ENSBTAG00000000746	1329.392106	1524.451976	1550.09328	2706.219905	2623.398507	2324.118778	1467.979121	2551.24573	-0.797289792	1.06E-11	5.60E-10	KAT2B	1	157277141	157374828	+	4539	protein_coding	lysine acetyltransferase 2B [Source:VGNC Symbol;Acc:VGNC:30399]	Bromodomain
ENSBTAG00000039719	1087.864427	1064.617282	1126.368722	666.7498317	612.2614754	647.2106311	1092.950143	642.0739794	0.767406364	1.09E-11	5.71E-10	PHGDH	3	23565140	23596466	-	1975	protein_coding	Bos taurus phosphoglycerate dehydrogenase (PHGDH), mRNA. [Source:RefSeq mRNA;Acc:NM_001035017]	2-Hacid_dh_C
ENSBTAG00000015457	4086.173205	3972.571905	3568.616002	2409.551428	2456.141647	2331.90477	3875.787037	2399.199282	0.691937346	1.13E-11	5.88E-10	FGFR1	27	33549267	33599083	-	3684	protein_coding	fibroblast growth factor receptor 1 [Source:VGNC Symbol;Acc:VGNC:50179]	Pkinase_Tyr
ENSBTAG00000004931	196.9836405	195.9295655	207.9748977	67.37894227	82.1079131	75.91342741	200.2960346	75.13342759	1.414758582	1.21E-11	6.27E-10	POLE2	10	42673879	42705616	-	1584	protein_coding	Bos taurus DNA polymerase epsilon 2, accessory subunit (POLE2), mRNA. [Source:RefSeq mRNA;Acc:NM_001105383]	-
ENSBTAG00000050675	179.1660248	228.9177066	224.4962681	75.42418911	44.60182934	74.94017834	210.8599998	64.98873226	1.696950563	1.32E-11	6.87E-10	-	11	10504933	10514090	+	1900	protein_coding	-	-
ENSBTAG00000007986	1532.314952	1570.435446	1281.863973	750.2192677	858.5852147	674.4616051	1461.538124	761.0886958	0.941488651	1.35E-11	7.00E-10	NSD2	6	116642228	116685495	-	6206	protein_coding	nuclear receptor binding SET domain protein 2 [Source:VGNC Symbol;Acc:VGNC:32272]	SET
ENSBTAG00000013919	962.151249	967.6521398	976.7045431	1687.490524	1645.199296	2194.676651	968.8359773	1842.455491	-0.927437977	1.39E-11	7.15E-10	-	23	25723715	25735337	+	1731	protein_coding	major histocompatibility complex, class II, DRB3 [Source:NCBI gene;Acc:282530]	C1-set
ENSBTAG00000018417	577.0927759	559.7987586	570.4732008	943.3051918	960.9666866	1005.366289	569.1215784	969.879389	-0.769120398	1.45E-11	7.46E-10	PSMF1	13	59967956	60007443	-	1310	protein_coding	Bos taurus proteasome inhibitor subunit 1 (PSMF1), mRNA. [Source:RefSeq mRNA;Acc:NM_001076478]	-
novel.1468	131.6523828	173.9374714	197.2845993	444.4998878	400.4027861	367.8881482	167.6248178	404.2636074	-1.269621748	1.63E-11	8.32E-10	-	5	64055728	64064510	-	8783	-	-	-
ENSBTAG00000001023	517.7007235	578.7919307	507.3032552	289.6288862	265.5836201	229.6867804	534.5986365	261.6330956	1.031233511	1.71E-11	8.73E-10	ZNF598	25	1550964	1561670	-	3329	protein_coding	zinc finger protein 598 [Source:VGNC Symbol;Acc:VGNC:37309]	-
ENSBTAG00000053806	68.30086027	102.962986	93.29715039	240.3517493	220.9817908	303.6537096	88.18699887	254.9957499	-1.53231852	1.73E-11	8.80E-10	-	7	5745461	5749112	+	2068	protein_coding	bone marrow stromal antigen 2 [Source:NCBI gene;Acc:618737]	-
ENSBTAG00000008951	808.7217803	831.7010127	794.9694689	1311.375235	1334.000168	1325.565232	811.7974206	1323.646878	-0.705370407	1.82E-11	9.24E-10	ALPL	2	131181416	131245100	-	4239	protein_coding	Bos taurus alkaline phosphatase, liver/bone/kidney (ALPL), mRNA. [Source:RefSeq mRNA;Acc:NM_176858]	-
ENSBTAG00000014737	707.7552912	777.7204182	722.0810702	336.8947114	381.1429052	428.2295905	735.8522598	382.089069	0.94513148	1.88E-11	9.52E-10	VEGFC	27	8017950	8103703	-	2050	protein_coding	vascular endothelial growth factor C [Source:VGNC Symbol;Acc:VGNC:36785]	-
ENSBTAG00000010774	1356.11853	1348.515224	1485.951489	641.6084354	802.8329281	818.5024673	1396.861748	754.3146103	0.888881833	1.98E-11	9.96E-10	NUSAP1	10	36788934	36819852	+	2931	protein_coding	nucleolar and spindle associated protein 1 [Source:VGNC Symbol;Acc:VGNC:32370]	-
novel.1636	87.10834353	67.97556354	72.88839874	196.1028917	194.6261644	230.6600294	75.9907686	207.1296952	-1.446918713	2.05E-11	1.03E-09	-	7	54281492	54284723	-	1930	-	-	-
ENSBTAG00000048856	244.4972824	240.9133943	286.6943684	536.0145706	480.4833433	628.7188988	257.3683484	548.4056042	-1.091437934	2.08E-11	1.04E-09	C16H1orf115	16	24176353	24188885	+	2796	protein_coding	Bos taurus chromosome 16 C1orf115 homolog (C16H1orf115), mRNA. [Source:RefSeq mRNA;Acc:NM_001205383]	-
ENSBTAG00000048296	184.1153625	188.932081	255.5953183	451.5394788	455.1413948	496.3570254	209.5475872	467.6792997	-1.157858603	2.14E-11	1.07E-09	CLTRN	X	127841454	127878242	+	1540	protein_coding	Bos taurus collectrin, amino acid transport regulator (CLTRN), mRNA. [Source:RefSeq mRNA;Acc:NM_001075603]	-
ENSBTAG00000004556	4797.887967	4855.25459	5278.091914	7950.715188	7570.146852	7553.386027	4977.078157	7691.416022	-0.627925578	2.18E-11	1.08E-09	SLC2A3	5	101438341	101451219	-	4066	protein_coding	Bos taurus solute carrier family 2 member 3 (SLC2A3), mRNA. [Source:RefSeq mRNA;Acc:NM_174603]	Sugar_tr
ENSBTAG00000000501	404.8558239	371.8663182	359.5827671	717.0326245	658.8906606	830.1814562	378.7683031	735.3682471	-0.957442281	2.59E-11	1.28E-09	KLHL13	X	2100820	2298436	-	4504	protein_coding	Bos taurus kelch like family member 13 (KLHL13), mRNA. [Source:RefSeq mRNA;Acc:NM_001102511]	BACK
novel.317	618.6672126	606.7818687	580.191654	1314.392202	1250.878577	963.5165787	601.8802451	1176.262453	-0.966522725	2.70E-11	1.34E-09	-	13	346147	376064	+	10125	-	-	-
ENSBTAG00000013790	2727.085073	2801.992715	3014.664172	4564.671925	4559.523372	4261.857675	2847.913987	4462.017657	-0.647735518	3.50E-11	1.73E-09	MAP3K1	20	22340163	22417428	-	6942	protein_coding	Bos taurus mitogen-activated protein kinase kinase kinase 1 (MAP3K1), mRNA. [Source:RefSeq mRNA;Acc:NM_001205906]	Pkinase
ENSBTAG00000007075	585.0117162	624.7754002	665.7140418	1081.080044	1063.348158	1301.234006	625.1670527	1148.554069	-0.877602453	3.66E-11	1.80E-09	-	23	27943564	28059869	+	3899	protein_coding	Bos taurus major histocompatibility complex, class I, A-like (LOC616942), mRNA. [Source:RefSeq mRNA;Acc:NM_001206459]	MHC_I
ENSBTAG00000003687	726.5627744	710.7444953	647.2489808	385.1661924	342.6231435	266.670245	694.8520835	331.486527	1.068189706	3.78E-11	1.85E-09	FOXK2	19	50030249	50079424	-	4025	protein_coding	forkhead box K2 [Source:VGNC Symbol;Acc:VGNC:55831]	Fork_head
ENSBTAG00000015511	2240.070243	2347.156223	2254.681134	1500.438535	1431.313251	1454.03411	2280.635867	1461.928632	0.641548097	4.18E-11	2.04E-09	FADS3	29	40392841	40407757	-	1703	protein_coding	Bos taurus fatty acid desaturase 3 (FADS3), mRNA. [Source:RefSeq mRNA;Acc:NM_001083691]	-
ENSBTAG00000002341	5903.570009	5945.862529	5879.664165	3301.568171	3195.112865	2112.92373	5909.698901	2869.868255	1.042186926	4.21E-11	2.05E-09	ETS1	29	31813186	31949833	-	3262	protein_coding	ETS proto-oncogene 1, transcription factor [Source:VGNC Symbol;Acc:VGNC:28626]	Ets
ENSBTAG00000015821	643.4139011	669.759229	610.3188588	338.9060231	322.3495847	229.6867804	641.1639963	296.9807961	1.110883904	4.25E-11	2.06E-09	AMPD3	15	42183570	42201212	-	1635	protein_coding	adenosine monophosphate deaminase 3 [Source:VGNC Symbol;Acc:VGNC:50189]	-
ENSBTAG00000004135	3277.451425	3292.816269	3383.965392	2081.707619	2156.092977	1788.83179	3318.077696	2008.877462	0.724078093	4.28E-11	2.06E-09	LMTK2	25	37799299	37874887	-	10458	protein_coding	lemur tyrosine kinase 2 [Source:VGNC Symbol;Acc:VGNC:30941]	Pkinase_Tyr
ENSBTAG00000016746	1027.482507	1019.633453	841.6180441	451.5394788	536.23563	530.4207428	962.9113346	506.0652839	0.927906254	4.28E-11	2.06E-09	UBE2C	13	74586517	74593327	+	2768	protein_coding	ubiquitin conjugating enzyme E2 C [Source:VGNC Symbol;Acc:VGNC:36578]	UQ_con
ENSBTAG00000006253	11489.39254	11190.97697	10516.33817	5180.133308	5412.026519	2784.465587	11065.56923	4458.875138	1.31137646	4.41E-11	2.12E-09	FLNC	4	92797675	92825735	+	9464	protein_coding	filamin C [Source:VGNC Symbol;Acc:VGNC:29035]	CH
ENSBTAG00000008499	614.7077424	564.7969618	517.9935537	309.7420033	289.9118907	287.1084755	565.8327526	295.5874565	0.9367798	4.52E-11	2.17E-09	TROAP	5	30487010	30495995	-	3093	protein_coding	trophinin associated protein [Source:VGNC Symbol;Acc:VGNC:36378]	-
ENSBTAG00000024803	1517.466939	1576.43329	1707.532221	894.0280549	898.1186544	1024.83127	1600.477483	938.9926598	0.769190323	4.85E-11	2.32E-09	ENDOD1	15	15326369	15361768	-	4555	protein_coding	Bos taurus endonuclease domain containing 1 (ENDOD1), mRNA. [Source:RefSeq mRNA;Acc:NM_001102519]	-
ENSBTAG00000009035	1231.39522	1256.548285	1346.005763	753.2362352	695.3830665	542.0997316	1277.983089	663.5730111	0.945870509	4.91E-11	2.34E-09	CENPE	6	21674019	21756964	+	8583	protein_coding	centromere protein E [Source:VGNC Symbol;Acc:VGNC:27175]	Kinesin
ENSBTAG00000001839	1169.033565	1109.601111	1250.764922	1999.243839	1967.54888	2566.457796	1176.466533	2177.750172	-0.888437887	5.25E-11	2.49E-09	OCIAD2	6	67528050	67539862	-	1608	protein_coding	OCIA domain containing 2 [Source:VGNC Symbol;Acc:VGNC:32396]	-
ENSBTAG00000020269	58.40218487	74.97304802	67.05732684	189.0633007	167.25686	256.9377543	66.81085324	204.419305	-1.614138061	5.48E-11	2.60E-09	MISP	7	43325602	43335553	+	3413	protein_coding	Bos taurus mitotic spindle positioning (MISP), mRNA. [Source:RefSeq mRNA;Acc:NM_001035269]	-
ENSBTAG00000017402	556.3055575	552.8012741	514.1061725	879.9488729	942.7204837	986.8745563	541.0710014	936.5146377	-0.791660258	5.49E-11	2.60E-09	OSBPL2	13	54954218	54970753	-	2261	protein_coding	Bos taurus oxysterol binding protein like 2 (OSBPL2), mRNA. [Source:RefSeq mRNA;Acc:NM_001035020]	-
ENSBTAG00000018588	9982.814142	10167.34495	11383.22419	16361.0151	16148.90325	18440.15012	10511.12776	16983.35616	-0.69220508	5.77E-11	2.72E-09	TMBIM6	5	30112133	30128722	-	2806	protein_coding	Bos taurus transmembrane BAX inhibitor motif containing 6 (TMBIM6), mRNA. [Source:RefSeq mRNA;Acc:NM_001076414]	-
novel.1310	291.0210568	246.9112382	297.3846669	596.3539219	519.003105	530.4207428	278.4389873	548.5925899	-0.978099126	5.82E-11	2.73E-09	-	3	119465142	119474797	+	6108	-	-	-
ENSBTAG00000009359	1342.260384	1533.448742	1702.672995	2991.826168	2830.188807	4633.638819	1526.127374	3485.217931	-1.191417842	6.07E-11	2.84E-09	-	15	38342903	38343841	-	939	protein_coding	-	Ferritin
ENSBTAG00000020839	98.98675401	106.9615485	124.3962005	30.16967564	31.42401612	19.46498139	110.1148343	27.01955772	2.029366482	6.24E-11	2.91E-09	MEGF6	16	49436521	49536217	+	5534	protein_coding	multiple EGF like domains 6 [Source:NCBI gene;Acc:616459]	EGF_CA
ENSBTAG00000000638	185.10523	228.9177066	167.1573944	66.37328642	65.88906606	73.96692927	193.726777	68.74309392	1.493953385	6.38E-11	2.97E-09	CDT1	18	14008412	14012515	+	2128	protein_coding	chromatin licensing and DNA replication factor 1 [Source:VGNC Symbol;Acc:VGNC:27158]	-
ENSBTAG00000007867	1860.950975	1820.345606	1896.070213	2761.530977	2896.077873	2896.38923	1859.122265	2851.332694	-0.617002786	6.73E-11	3.12E-09	STAT1	2	79518741	79560102	-	2622	protein_coding	Bos taurus signal transducer and activator of transcription 1 (STAT1), mRNA. [Source:RefSeq mRNA;Acc:NM_001077900]	STAT_alpha
ENSBTAG00000011434	269.2439709	217.9216596	196.3127539	91.51468279	82.1079131	86.61916717	227.8261281	86.74725435	1.392836296	7.09E-11	3.28E-09	NPR2	8	59956219	59974722	+	4130	protein_coding	natriuretic peptide receptor 2 [Source:NCBI gene;Acc:281357]	Guanylate_cyc
ENSBTAG00000000459	154.4193363	142.9486116	136.0583443	34.19229906	55.75228667	39.90321184	144.4754307	43.28259919	1.739793003	7.85E-11	3.62E-09	POMGNT2	22	15060378	15080375	+	2488	protein_coding	Bos taurus protein O-linked mannose N-acetylglucosaminyltransferase 2 (beta 1,4-) (POMGNT2), mRNA. [Source:RefSeq mRNA;Acc:NM_001011682]	-
ENSBTAG00000013931	390.0078108	440.8415224	362.4983031	182.0237097	154.0790468	205.3555536	397.7825454	180.4861034	1.139301633	8.28E-11	3.80E-09	CIAO2B	18	34635125	34637400	-	1189	protein_coding	Bos taurus cytosolic iron-sulfur assembly component 2B (CIAO2B), mRNA. [Source:RefSeq mRNA;Acc:NM_001193038]	-
ENSBTAG00000001752	1321.473166	1365.509115	1426.668925	2289.878381	2339.568684	3133.862003	1371.217068	2587.76969	-0.916333485	8.29E-11	3.80E-09	FUCA2	9	80952916	80972653	-	1843	protein_coding	Bos taurus alpha-L-fucosidase 2 (FUCA2), mRNA. [Source:RefSeq mRNA;Acc:NM_001205818]	Alpha_L_fucos
ENSBTAG00000016529	681.0288676	661.7621039	677.3761856	1186.673909	1188.030545	1045.269501	673.3890524	1139.991318	-0.759357553	8.49E-11	3.88E-09	SLC25A30	12	15541390	15565519	+	2010	protein_coding	Bos taurus solute carrier family 25 member 30 (SLC25A30), mRNA. [Source:RefSeq mRNA;Acc:NM_001098895]	Mito_carr
ENSBTAG00000001864	55.43258224	53.98059458	57.33887368	4.022623419	6.082067637	7.785992555	55.58401683	5.963561204	3.217347192	8.50E-11	3.88E-09	NR4A3	8	64872311	64912348	+	3397	protein_coding	nuclear receptor subfamily 4 group A member 3 [Source:VGNC Symbol;Acc:VGNC:32247]	zf-C4
ENSBTAG00000044157	157.3889389	136.9507677	139.9457256	53.2997603	46.62918522	41.84970998	144.7618107	47.25955183	1.615709258	8.60E-11	3.91E-09	-	18	62118907	62122389	+	2385	protein_coding	-	-
novel.766	414.7544993	391.859131	351.8080046	662.7272083	737.9575399	716.3113151	386.140545	705.6653544	-0.870025497	9.49E-11	4.31E-09	-	19	14880919	14884254	-	1590	-	-	-
ENSBTAG00000017894	424.6531747	406.8537406	380.9633641	195.0972358	202.7355879	140.147866	404.1567598	179.3268966	1.173129515	9.81E-11	4.44E-09	CAD	11	72393099	72414662	-	7137	protein_coding	Bos taurus carbamoyl-phosphate synthetase 2, aspartate transcarbamylase, and dihydroorotase (CAD), mRNA. [Source:RefSeq mRNA;Acc:NM_001191393]	CPSase_L_D2
ENSBTAG00000006082	876.032773	888.6805292	837.7306629	1404.901229	1374.547286	1605.860964	867.4813217	1461.769827	-0.752985986	9.86E-11	4.45E-09	DNASE2	7	12676733	12679144	+	1362	protein_coding	Bos taurus deoxyribonuclease 2, lysosomal (DNASE2), mRNA. [Source:RefSeq mRNA;Acc:NM_001075127]	-
ENSBTAG00000040078	670.1403246	673.7577916	660.8548153	1045.882089	1135.319292	1129.94217	668.2509772	1103.714517	-0.723953815	1.00E-10	4.50E-09	FLVCR2	10	86764090	86898356	+	2997	protein_coding	Bos taurus feline leukemia virus subgroup C cellular receptor family, member 2 (FLVCR2), mRNA. [Source:RefSeq mRNA;Acc:NM_001192143]	MFS_1
ENSBTAG00000006846	677.0693974	678.7559948	665.7140418	1073.034797	1096.79953	1202.93585	673.846478	1124.256726	-0.73861638	1.07E-10	4.78E-09	LGALS9	19	19368210	19387215	+	1965	protein_coding	galectin 9 [Source:NCBI gene;Acc:510813]	-
novel.1608	519.6804585	482.8264293	523.8246256	895.0337108	881.8998073	831.1547052	508.7771711	869.3627411	-0.772748112	1.15E-10	5.15E-09	-	7	12399249	12426720	-	8559	-	-	-
ENSBTAG00000007204	2181.668058	2287.177785	2010.74796	1398.867294	1325.890745	1284.688772	2159.864601	1336.48227	0.692501285	1.17E-10	5.22E-09	KRT80	5	27732717	27757234	+	4095	protein_coding	Bos taurus keratin 80 (KRT80), mRNA. [Source:RefSeq mRNA;Acc:NM_001077952]	Filament
ENSBTAG00000014211	1518.456806	1490.464195	1311.019332	891.0110873	803.846606	703.6590772	1439.980111	799.5055902	0.849000248	1.18E-10	5.27E-09	FOXP4	23	15366276	15417429	+	4546	protein_coding	Bos taurus forkhead box P4 (FOXP4), mRNA. [Source:RefSeq mRNA;Acc:NM_001205524]	Fork_head
novel.414	77.20966813	63.97700098	69.00101748	12.06787026	14.19149115	9.732490694	70.06256219	11.99728403	2.548059749	1.23E-10	5.46E-09	-	14	12705616	12750679	+	1748	-	-	-
ENSBTAG00000017077	10996.4385	11249.95577	11936.20418	19723.92828	19957.29127	30387.75569	11394.19948	23356.32508	-1.035523714	1.26E-10	5.59E-09	CTSL2	8	83553382	83558696	-	2275	protein_coding	Cathepsin L1 Cathepsin L1 heavy chain Cathepsin L1 light chain [Source:UniProtKB/Swiss-Prot;Acc:P25975]	Peptidase_C1
ENSBTAG00000020178	99.97662155	106.9615485	113.705902	258.4535547	225.0365026	263.7504978	106.8813574	249.080185	-1.220641346	1.27E-10	5.61E-09	ARSK	7	94867666	94924213	+	3368	protein_coding	arylsulfatase family member K [Source:VGNC Symbol;Acc:VGNC:26179]	Sulfatase
ENSBTAG00000015637	2152.9619	2082.251454	2312.020008	1338.527943	1438.408996	1300.260757	2182.411121	1359.065898	0.68342905	1.32E-10	5.78E-09	IMPAD1	14	23867153	23883121	-	2387	protein_coding	Bos taurus inositol monophosphatase domain containing 1 (IMPAD1), mRNA. [Source:RefSeq mRNA;Acc:NM_001046335]	-
ENSBTAG00000000599	7555.658933	7264.388533	7521.110905	11312.62271	11340.01511	13643.9787	7447.05279	12098.87217	-0.700149582	1.38E-10	6.04E-09	CCNI	6	91881488	91920400	-	2991	protein_coding	Bos taurus cyclin I (CCNI), mRNA. [Source:RefSeq mRNA;Acc:NM_001083373]	-
ENSBTAG00000014435	436.5315852	386.8609278	424.6964033	168.9501836	194.6261644	226.7670332	416.0296388	196.781127	1.07959266	1.43E-10	6.24E-09	TCF19	23	27988581	27992408	-	2110	protein_coding	Bos taurus transcription factor 19 (TCF19), mRNA. [Source:RefSeq mRNA;Acc:NM_001083684]	FHA
ENSBTAG00000005631	849.3063494	764.7250898	829.9559003	437.4602968	494.6748345	462.293308	814.6624465	464.8094797	0.809672522	1.46E-10	6.37E-09	VARS	23	27533912	27546157	+	4627	protein_coding	valyl-tRNA synthetase [Source:VGNC Symbol;Acc:VGNC:36765]	GST_C
ENSBTAG00000024874	317.7474804	315.8864423	374.1604469	152.8596899	168.270538	149.8803567	335.9314565	157.0035282	1.097838529	1.47E-10	6.37E-09	MAD2L1	NKLS02000723.1	7006	14630	-	438	protein_coding	mitotic arrest deficient 2 like 1 [Source:HGNC Symbol;Acc:HGNC:6763]	-
ENSBTAG00000017719	304.8792023	298.8925514	300.3002028	125.7069818	152.0516909	98.29815601	301.3573189	125.3522763	1.266586229	1.47E-10	6.37E-09	AKAP6	21	42714751	43212928	+	7970	protein_coding	Bos taurus A-kinase anchoring protein 6 (AKAP6), mRNA. [Source:RefSeq mRNA;Acc:NM_001192923]	-
ENSBTAG00000034645	506.8121805	578.7919307	568.5295102	940.2882242	917.3785352	1060.841486	551.3778738	972.8360817	-0.819296723	1.54E-10	6.64E-09	PON3	4	12593909	12631421	-	2216	protein_coding	Bos taurus paraoxonase 3 (PON3), mRNA. [Source:RefSeq mRNA;Acc:NM_001075479]	-
ENSBTAG00000021102	1752.065546	1839.338778	1657.96811	2690.129412	2867.694891	3341.164055	1749.790811	2966.329452	-0.761604977	1.58E-10	6.81E-09	GALM	11	21021076	21075762	+	2413	protein_coding	Bos taurus galactose mutarotase (GALM), mRNA. [Source:RefSeq mRNA;Acc:NM_001034795]	Aldose_epim
ENSBTAG00000008021	55.43258224	68.97520418	41.78934861	163.9219043	167.25686	167.3988399	55.39904501	166.1925348	-1.586116867	1.64E-10	7.04E-09	-	7	5735682	5737511	+	513	protein_coding	bone marrow stromal antigen 2-like [Source:NCBI gene;Acc:112441507]	-
ENSBTAG00000000988	1590.717137	1674.398073	1869.830389	962.412653	924.4742808	647.2106311	1711.648533	844.6991883	1.019160791	1.68E-10	7.19E-09	BRCA2	12	28616747	28667820	-	10872	protein_coding	BRCA2, DNA repair associated [Source:VGNC Symbol;Acc:VGNC:26554]	-
ENSBTAG00000000322	6685.565366	6968.494904	7570.675016	10836.94749	10469.26576	11284.82296	7074.911762	10863.67874	-0.618724761	1.71E-10	7.30E-09	CD2AP	23	20602899	20689496	+	5599	protein_coding	Bos taurus CD2 associated protein (CD2AP), mRNA. [Source:RefSeq mRNA;Acc:NM_001206539]	SH3_1
novel.363	334.5752285	355.8720679	360.5546124	672.7837669	731.8754723	581.0296944	350.3339696	661.8963112	-0.917595702	1.71E-10	7.31E-09	-	13	81585381	81592144	+	1151	-	-	-
ENSBTAG00000010546	639.4544309	554.8005554	503.415874	310.7476591	254.4331628	280.295732	565.8902867	281.825518	1.005575794	1.83E-10	7.79E-09	LIN54	6	97753005	97815165	-	4776	protein_coding	lin-54 DREAM MuvB core complex component [Source:VGNC Symbol;Acc:VGNC:30894]	-
novel.903	79.18940321	91.96693891	90.38161444	11.0622144	25.34194849	11.67898883	87.17931885	16.02771724	2.446503578	1.84E-10	7.80E-09	-	20	25746133	25756975	-	1659	-	-	-
novel.1386	143.5307933	132.9522052	156.467096	51.28844859	51.69757491	39.90321184	144.3166981	47.62974512	1.600649286	1.90E-10	8.02E-09	-	4	94651385	94668786	-	1962	-	-	-
ENSBTAG00000055207	2987.420236	3062.898922	3054.50983	4382.648215	4537.222457	4679.381526	3034.942996	4533.084066	-0.578841532	1.90E-10	8.02E-09	SCD	26	21263727	21279185	+	5346	protein_coding	Bos taurus stearoyl-CoA desaturase (SCD), mRNA. [Source:RefSeq mRNA;Acc:NM_173959]	-
ENSBTAG00000009037	1172.993035	1207.565893	1432.499997	2100.815081	2121.627927	2152.826941	1271.019642	2125.089983	-0.741442023	1.93E-10	8.14E-09	GALNT12	8	63854829	63887891	+	3308	protein_coding	polypeptide N-acetylgalactosaminyltransferase 12 [Source:VGNC Symbol;Acc:VGNC:29225]	Glycos_transf_2
ENSBTAG00000000414	80.17927075	83.96981379	64.14179089	191.0746124	199.6945541	320.1989438	76.09695848	236.9893701	-1.639967416	1.98E-10	8.31E-09	-	7	18515026	18516457	+	1432	protein_coding	fucosyltransferase 6 [Source:NCBI gene;Acc:338077]	-
ENSBTAG00000018383	642.4240335	709.7448546	821.2092925	407.2906212	327.4179744	372.7543936	724.4593935	369.1543297	0.972696849	2.00E-10	8.39E-09	ATAD5	19	18061035	18096596	-	6820	protein_coding	Bos taurus ATPase family, AAA domain containing 5 (ATAD5), mRNA. [Source:RefSeq mRNA;Acc:NM_001206489]	AAA
ENSBTAG00000010564	520.6703261	507.8174453	629.7557651	1173.600383	1216.413527	904.1483855	552.7478455	1098.054098	-0.989926761	2.19E-10	9.14E-09	ELOVL6	6	15199666	15360477	+	3234	protein_coding	ELOVL fatty acid elongase 6 [Source:VGNC Symbol;Acc:VGNC:28452]	ELO
ENSBTAG00000002826	309.82854	261.9058478	232.2710307	122.6900143	107.4498616	106.0841486	268.0018062	112.0746748	1.257825547	2.22E-10	9.27E-09	CLSPN	3	110021003	110047343	+	4102	protein_coding	claspin [Source:VGNC Symbol;Acc:VGNC:27465]	-
ENSBTAG00000050006	192.0343028	206.9256125	236.1584119	407.2906212	420.6763449	525.5544975	211.7061091	451.1738212	-1.091700511	2.25E-10	9.34E-09	HOXB6	19	37894377	37896079	+	675	protein_coding	homeobox B6 [Source:NCBI gene;Acc:112442654]	Homeobox
ENSBTAG00000019703	700.8262184	597.7851029	617.121776	337.9003672	345.6641774	364.968401	638.5776991	349.5109819	0.869377372	2.26E-10	9.35E-09	PRPS1	X	56240053	56262495	+	2078	protein_coding	Bos taurus phosphoribosyl pyrophosphate synthetase 1 (PRPS1), mRNA. [Source:RefSeq mRNA;Acc:NM_001046189]	-
ENSBTAG00000008280	273.2034411	309.8885985	289.6099043	580.2634282	497.7158683	567.4042074	290.900648	548.461168	-0.915052488	2.35E-10	9.70E-09	HNF4G	14	38801752	38831315	+	3816	protein_coding	Bos taurus hepatocyte nuclear factor 4 gamma (HNF4G), transcript variant 1, mRNA. [Source:RefSeq mRNA;Acc:NM_205811]	Hormone_recep
ENSBTAG00000039462	1301.675815	1282.538942	1506.360241	654.6819615	595.0289505	841.860445	1363.524999	697.1904523	0.967451669	2.40E-10	9.87E-09	PCLAF	10	45645746	45653956	+	1343	protein_coding	Bos taurus PCNA clamp associated factor (PCLAF), mRNA. [Source:RefSeq mRNA;Acc:NM_001015678]	-
ENSBTAG00000013677	2237.100641	2214.204018	2198.314106	1384.788112	1347.177982	1056.948489	2216.539588	1262.971528	0.811669095	2.40E-10	9.87E-09	SEC14L1	19	54705353	54755623	-	4732	protein_coding	Bos taurus SEC14 like lipid binding 1 (SEC14L1), mRNA. [Source:RefSeq mRNA;Acc:NM_001101975]	MSF1
ENSBTAG00000008652	277.1629112	261.9058478	273.088534	118.6673909	110.4908954	136.2548697	270.7190976	121.8043853	1.151574217	2.45E-10	1.00E-08	DUSP27	3	1605719	1673362	-	4603	protein_coding	Bos taurus dual specificity phosphatase 27, atypical (DUSP27), mRNA. [Source:RefSeq mRNA;Acc:NM_001102543]	DSPc
ENSBTAG00000002082	2482.587791	2486.106272	2745.463019	4113.132446	3928.002015	4834.128128	2571.385694	4291.754196	-0.739047089	2.71E-10	1.11E-08	MARCKS	9	36554305	36560717	-	3245	protein_coding	myristoylated alanine rich protein kinase C substrate [Source:VGNC Symbol;Acc:VGNC:31244]	-
ENSBTAG00000001173	285.0818515	329.8814113	257.5390089	117.661735	142.9285895	106.0841486	290.8340906	122.2248243	1.251168063	2.73E-10	1.11E-08	PLXNA2	16	75116092	75349323	+	6439	protein_coding	Bos taurus plexin A2 (PLXNA2), mRNA. [Source:RefSeq mRNA;Acc:NM_001206657]	Sema
ENSBTAG00000003746	2037.147398	2101.244626	2430.585137	3682.71174	3476.915332	4424.390269	2189.659053	3861.339114	-0.818409565	2.78E-10	1.13E-08	SCP2	3	93275045	93393567	-	2624	protein_coding	Bos taurus sterol carrier protein 2 (SCP2), mRNA. [Source:RefSeq mRNA;Acc:NM_001033990]	Thiolase_N
ENSBTAG00000048608	183.1254949	96.96514211	59.28256431	18.10180539	14.19149115	18.49173232	113.1244004	16.92834295	2.739365735	2.99E-10	1.21E-08	RF00002	27	6222648	6222800	-	153	rRNA	-	-
ENSBTAG00000054461	683.9984702	589.7879778	624.8965385	1378.754177	1529.640011	999.5267943	632.8943288	1302.640327	-1.041214859	3.05E-10	1.23E-08	-	25	27398592	27417799	+	3465	protein_coding	-	VWA
ENSBTAG00000003100	474.1465517	524.8113362	453.8517628	181.0180539	252.4058069	250.1250108	484.2698836	227.8496239	1.087419081	3.25E-10	1.31E-08	SMTN	17	69938495	69961375	+	4238	protein_coding	Bos taurus smoothelin (SMTN), mRNA. [Source:RefSeq mRNA;Acc:NM_001076879]	CH
ENSBTAG00000023659	9844.232686	9812.472525	11204.40465	4859.32909	5083.594866	6769.920527	10287.03662	5570.948161	0.884792983	3.26E-10	1.32E-08	MT2A	18	24042348	24043480	-	586	protein_coding	metallothionein 2A [Source:NCBI gene;Acc:404070]	-
ENSBTAG00000007865	1154.185552	1226.559066	1204.116347	1855.435052	1929.029119	2306.600294	1194.953655	2030.354822	-0.764890203	3.27E-10	1.32E-08	GNPDA1	7	53066435	53077719	-	2307	protein_coding	Bos taurus glucosamine-6-phosphate deaminase 1 (GNPDA1), mRNA. [Source:RefSeq mRNA;Acc:NM_001080287]	-
ENSBTAG00000015403	3407.124073	3453.758412	3632.757793	6317.53008	6298.994716	5023.911696	3497.880093	5880.145497	-0.749317715	3.31E-10	1.33E-08	TPP1	15	46444901	46452583	+	4358	protein_coding	tripeptidyl peptidase 1 [Source:VGNC Symbol;Acc:VGNC:36256]	-
ENSBTAG00000018046	816.6407206	891.6794511	964.070554	1461.217957	1445.504742	1695.399879	890.7969086	1534.040859	-0.784209442	3.34E-10	1.33E-08	B3GNT2	11	60724002	60756539	+	2947	protein_coding	Bos taurus UDP-GlcNAc:betaGal beta-1,3-N-acetylglucosaminyltransferase 2 (B3GNT2), mRNA. [Source:RefSeq mRNA;Acc:NM_001102497]	Galactosyl_T
ENSBTAG00000018493	5770.927759	5497.023881	5936.031194	8623.498955	8581.797435	10070.20812	5734.660944	9091.834837	-0.664878507	3.35E-10	1.34E-08	ERICH5	14	66134855	66162958	-	3031	protein_coding	Bos taurus glutamate rich 5 (ERICH5), mRNA. [Source:RefSeq mRNA;Acc:NM_001077844]	-
ENSBTAG00000017368	4350.467839	4141.511173	3376.19063	2272.782232	2240.228246	2432.149424	3956.056547	2315.053301	0.772946882	3.38E-10	1.34E-08	YBX1	3	103521364	103539465	-	991	protein_coding	Y-box binding protein 1 [Source:VGNC Symbol;Acc:VGNC:50233]	CSD
ENSBTAG00000007116	2187.607264	2122.237079	2497.642464	3665.615591	3484.011078	3698.346464	2269.162269	3615.991044	-0.672185979	3.48E-10	1.38E-08	ARRDC3	7	90839565	90853620	-	4149	protein_coding	arrestin domain containing 3 [Source:VGNC Symbol;Acc:VGNC:26173]	-
ENSBTAG00000030435	2917.139641	2896.958576	3053.537985	4538.524873	4514.921542	5496.910744	2955.878734	4850.119053	-0.714471507	3.65E-10	1.44E-08	PNRC2	2	128938566	128942609	-	2425	protein_coding	Bos taurus proline rich nuclear receptor coactivator 2 (PNRC2), mRNA. [Source:RefSeq mRNA;Acc:NM_001076957]	-
ENSBTAG00000004343	121.7537074	126.9543613	126.3398912	245.3800286	285.8571789	291.0014717	125.0159866	274.0795597	-1.132612412	3.67E-10	1.45E-08	CCS	29	44628778	44643562	+	2241	protein_coding	copper chaperone for superoxide dismutase [Source:VGNC Symbol;Acc:VGNC:26991]	HMA
ENSBTAG00000010932	175.2065546	183.9338778	211.862279	398.2397185	393.3070405	620.9329063	190.3342371	470.8265551	-1.306877651	3.80E-10	1.50E-08	DNAJC12	28	24248418	24296594	-	1178	protein_coding	DnaJ heat shock protein family (Hsp40) member C12 [Source:VGNC Symbol;Acc:VGNC:55984]	DnaJ
novel.991	133.6321179	103.9626266	98.15637697	27.15270808	32.43769406	33.09046836	111.9170405	30.8936235	1.856523931	4.04E-10	1.59E-08	-	23	28263843	28273388	+	2600	-	-	-
ENSBTAG00000021467	1800.569055	1872.326919	1937.859561	3297.545548	3380.615928	5422.943815	1870.251845	4033.701764	-1.108930678	4.10E-10	1.61E-08	IGFBP6	5	26878956	26883908	-	1736	protein_coding	insulin like growth factor binding protein 6 [Source:VGNC Symbol;Acc:VGNC:30088]	-
ENSBTAG00000013863	4131.707112	4237.476674	4497.700125	2616.716534	2683.205506	2966.463163	4288.961304	2755.461734	0.638287131	4.14E-10	1.62E-08	DUSP1	20	4540518	4543611	-	2034	protein_coding	Bos taurus dual specificity phosphatase 1 (DUSP1), mRNA. [Source:RefSeq mRNA;Acc:NM_001046452]	DSPc
ENSBTAG00000003039	472.1668166	429.8454753	503.415874	923.1920747	899.1323323	1549.412518	468.4760553	1123.912308	-1.262614881	4.18E-10	1.63E-08	PSMB8	23	7173038	7176410	-	1081	protein_coding	Bos taurus proteasome subunit beta 8 (PSMB8), mRNA. [Source:RefSeq mRNA;Acc:NM_001040480]	Proteasome
ENSBTAG00000012244	15662.67409	16560.04685	17483.49724	8016.082818	8061.780653	11082.38715	16568.73939	9053.416875	0.871900733	4.23E-10	1.65E-08	TUBA1B	5	30699220	30703581	+	2503	protein_coding	Tubulin alpha-1B chain Detyrosinated tubulin alpha-1B chain [Source:UniProtKB/Swiss-Prot;Acc:P81947]	Tubulin
ENSBTAG00000010180	381.0990029	353.8727867	339.1740155	166.9388719	180.4346732	116.7898883	358.0486017	154.7211445	1.211437984	4.36E-10	1.69E-08	URB2	28	1577597	1603804	+	5392	protein_coding	Bos taurus URB2 ribosome biogenesis homolog (URB2), mRNA. [Source:RefSeq mRNA;Acc:NM_001102004]	-
ENSBTAG00000000536	1570.919786	1574.434008	1510.247622	2309.991498	2401.403039	2678.381439	1551.867139	2463.258659	-0.666659318	4.45E-10	1.72E-08	ZNF395	8	10335582	10384049	+	5266	protein_coding	zinc finger protein 395 [Source:VGNC Symbol;Acc:VGNC:37266]	-
ENSBTAG00000017020	12.86827802	9.996406403	12.63398912	91.51468279	56.76596461	64.23443858	11.83289118	70.83836199	-2.580916474	4.55E-10	1.76E-08	S100G	X	126857761	126861849	-	451	protein_coding	S100 calcium binding protein G [Source:VGNC Symbol;Acc:VGNC:34249]	-
ENSBTAG00000011095	590.9509214	567.7958837	643.3615996	314.7702825	342.6231435	344.5301706	600.7028016	333.9745322	0.846943639	4.70E-10	1.81E-08	FAR2	5	80281585	80337660	-	3358	protein_coding	Bos taurus fatty acyl-CoA reductase 2 (FAR2), mRNA. [Source:RefSeq mRNA;Acc:NM_001076022]	NAD_binding_4
ENSBTAG00000020004	1362.057735	1323.524208	1480.120417	877.9375612	788.6414369	666.6756125	1388.567453	777.7515369	0.836481702	4.74E-10	1.82E-08	ZNF800	4	91589029	91638634	-	3339	protein_coding	Bos taurus zinc finger protein 800 (ZNF800), mRNA. [Source:RefSeq mRNA;Acc:NM_001205671]	-
ENSBTAG00000003474	1150.226082	1118.597876	927.140432	1785.039142	1749.608124	1844.306986	1065.321463	1792.984751	-0.75122231	5.42E-10	2.08E-08	RAB15	10	77076095	77096617	-	3300	protein_coding	Bos taurus RAB15, member RAS oncogene family (RAB15), mRNA. [Source:RefSeq mRNA;Acc:NM_001046538]	Ras
ENSBTAG00000051340	261.3250306	205.9259719	193.397218	91.51468279	89.20365867	64.23443858	220.2160735	81.65092668	1.432348384	5.77E-10	2.21E-08	-	15	42201107	42232877	-	2779	protein_coding	-	-
ENSBTAG00000009887	10200.585	10134.35681	10480.37989	14837.44648	14657.783	16257.15245	10271.7739	15250.79398	-0.570207939	5.87E-10	2.24E-08	DDX17	5	110161867	110180391	-	5212	protein_coding	Bos taurus DEAD-box helicase 17 (DDX17), mRNA. [Source:RefSeq mRNA;Acc:NM_001101993]	DEAD
ENSBTAG00000021181	1264.060849	1216.562659	1163.298844	667.7554876	700.4514562	796.1177388	1214.640784	721.4415608	0.751325395	5.88E-10	2.24E-08	BUB1	11	1585412	1618575	+	3731	protein_coding	Bos taurus BUB1 mitotic checkpoint serine/threonine kinase (BUB1), mRNA. [Source:RefSeq mRNA;Acc:NM_001102011]	Pkinase
ENSBTAG00000019129	218.7607264	210.9241751	210.8904337	386.1718482	420.6763449	405.8448619	213.5251117	404.2310183	-0.920772559	5.91E-10	2.24E-08	BTD	1	152638136	152679233	+	2265	protein_coding	Bos taurus biotinidase (BTD), mRNA. [Source:RefSeq mRNA;Acc:NM_001102206]	CN_hydrolase
ENSBTAG00000000283	1943.109981	2052.262235	2045.734391	1338.527943	1233.646052	1084.199463	2013.702202	1218.791153	0.724546404	6.09E-10	2.31E-08	CSF1	3	33488957	33509479	-	4430	protein_coding	colony stimulating factor 1 [Source:VGNC Symbol;Acc:VGNC:27753]	-
novel.94	57.41231733	50.98167266	46.64857519	151.8540341	130.7644542	162.5325946	51.68085506	148.3836943	-1.522286061	6.12E-10	2.31E-08	-	10	21607012	21609639	+	2628	-	-	-
ENSBTAG00000021204	2315.300176	2297.174191	2308.132627	1390.822047	1541.804146	1545.519522	2306.868998	1492.715238	0.627960806	6.45E-10	2.43E-08	TES	4	52169888	52225054	-	1660	protein_coding	Bos taurus testin LIM domain protein (TES), mRNA. [Source:RefSeq mRNA;Acc:NM_001046390]	LIM
ENSBTAG00000011734	6312.385303	6351.716628	6604.660771	3823.50356	3713.102292	4514.902433	6422.920901	4017.169428	0.676992174	7.11E-10	2.67E-08	ANKRD1	26	12533095	12542796	-	2081	protein_coding	ankyrin repeat domain 1 [Source:VGNC Symbol;Acc:VGNC:25908]	-
ENSBTAG00000007589	43.55417176	35.98706305	26.23982355	134.7578845	117.586641	110.9503939	35.26035279	121.0983065	-1.780803944	7.44E-10	2.79E-08	SMAD9	12	24731844	24795963	+	2337	protein_coding	Bos taurus SMAD family member 9 (SMAD9), mRNA. [Source:RefSeq mRNA;Acc:NM_001076928]	MH2
ENSBTAG00000027134	233.6087395	212.9234564	234.2147213	100.5655855	107.4498616	89.53891438	226.915639	99.18478715	1.194684231	8.30E-10	3.11E-08	DYNC1I1	4	13061840	13440805	+	3015	protein_coding	Bos taurus dynein cytoplasmic 1 intermediate chain 1 (DYNC1I1), mRNA. [Source:RefSeq mRNA;Acc:NM_001046516]	-
ENSBTAG00000045877	571.1535706	654.7646194	656.967434	1136.391116	977.1855336	1192.23011	627.6285413	1101.935587	-0.812158615	8.61E-10	3.22E-08	TSC22D3	X	56329795	56397086	-	3400	protein_coding	Bos taurus TSC22 domain family member 3 (TSC22D3), mRNA. [Source:RefSeq mRNA;Acc:NM_001103342]	-
ENSBTAG00000010532	959.1816463	921.6686704	866.8860224	555.1220318	562.5912564	553.7787205	915.912113	557.1640029	0.717073654	9.31E-10	3.47E-08	KCTD11	19	27038891	27055354	+	7194	protein_coding	potassium channel tetramerization domain containing 11 [Source:VGNC Symbol;Acc:VGNC:30501]	PH
ENSBTAG00000051211	630.545623	684.7538386	559.7829023	368.0700429	319.3085509	322.145442	625.0274547	336.5080119	0.893218102	9.67E-10	3.59E-08	DUSP8	29	49970526	49980774	+	4317	protein_coding	dual specificity phosphatase 8 [Source:NCBI gene;Acc:615727]	DSPc
ENSBTAG00000025494	890.8807861	947.659327	969.9016259	1424.00869	1519.503231	1474.47234	936.1472463	1472.661421	-0.653577373	9.74E-10	3.61E-08	PAQR8	23	24783271	24826623	+	3732	protein_coding	Bos taurus progestin and adipoQ receptor family member 8 (PAQR8), mRNA. [Source:RefSeq mRNA;Acc:NM_001101135]	-
ENSBTAG00000000182	724.5830393	732.7365893	810.518994	1209.803993	1301.562474	1625.325946	755.9462076	1378.897471	-0.867243968	1.01E-09	3.74E-08	SPINT2	18	48078059	48108357	+	1568	protein_coding	Bos taurus serine peptidase inhibitor, Kunitz type 2 (SPINT2), mRNA. [Source:RefSeq mRNA;Acc:NM_001045971]	Kunitz_BPTI
ENSBTAG00000011912	161.348409	195.9295655	139.9457256	56.31672787	65.88906606	53.52869882	165.7412334	58.57816425	1.500783203	1.05E-09	3.89E-08	SLC25A25	11	98712579	98748930	+	3817	protein_coding	Bos taurus solute carrier family 25 member 25 (SLC25A25), mRNA. [Source:RefSeq mRNA;Acc:NM_001038145]	Mito_carr
ENSBTAG00000012918	21.77708588	29.98921921	34.9864314	142.8031314	104.4088278	91.48541252	28.91757883	112.8991239	-1.963981193	1.10E-09	4.05E-08	CRISP3	23	22446157	22484653	-	2459	protein_coding	cysteine-rich secretory protein 3 [Source:NCBI gene;Acc:618612]	SCP
ENSBTAG00000000357	798.8231049	693.7506044	755.123811	385.1661924	409.5258875	255.9645052	749.2325067	350.2188617	1.097753544	1.16E-09	4.28E-08	PRAG1	27	24422980	24471208	-	6739	protein_coding	PEAK1 related, kinase-activating pseudokinase 1 [Source:NCBI gene;Acc:533821]	-
ENSBTAG00000017844	348.4333741	391.859131	444.1333097	203.1424827	198.6808761	157.6663492	394.8086049	186.4965693	1.082725034	1.24E-09	4.54E-08	STIL	3	98940131	98990375	+	4563	protein_coding	Bos taurus STIL, centriolar assembly protein (STIL), mRNA. [Source:RefSeq mRNA;Acc:NM_001206662]	-
ENSBTAG00000021945	497.9033727	449.8382881	490.7818849	275.5497042	238.2143158	192.7033157	479.5078486	235.4891119	1.026511735	1.27E-09	4.66E-08	NID2	10	44846568	44939145	-	4650	protein_coding	Bos taurus nidogen 2 (NID2), mRNA. [Source:RefSeq mRNA;Acc:NM_001102065]	EGF_CA
ENSBTAG00000002736	1682.774818	1617.418556	1621.037988	1021.746348	1065.375514	848.6731885	1640.410454	978.5983504	0.745488352	1.30E-09	4.75E-08	DNMT1	7	14686995	14730720	-	5500	protein_coding	Bos taurus DNA methyltransferase 1 (DNMT1), mRNA. [Source:RefSeq mRNA;Acc:NM_182651]	DNA_methylase
ENSBTAG00000009990	1037.381182	1061.61836	987.3948416	669.7667993	620.3708989	592.7086833	1028.798128	627.6154605	0.713084585	1.34E-09	4.86E-08	EPS15L1	7	6553352	6659290	+	4117	protein_coding	Bos taurus epidermal growth factor receptor pathway substrate 15 like 1 (EPS15L1), mRNA. [Source:RefSeq mRNA;Acc:NM_001101871]	-
ENSBTAG00000033304	1270.989921	1253.549363	1156.495927	595.348266	506.8389697	774.7062592	1227.011737	625.631165	0.971361336	1.34E-09	4.86E-08	TCIM	27	35232605	35233905	+	1301	protein_coding	Bos taurus transcriptional and immune response regulator (TCIM), mRNA. [Source:RefSeq mRNA;Acc:NM_001035490]	-
ENSBTAG00000030434	1803.538658	1796.354231	1740.574962	2627.778749	2687.260218	3064.761319	1780.15595	2793.266762	-0.650038161	1.36E-09	4.94E-08	FUCA1	2	129056428	129079502	+	2072	protein_coding	Bos taurus alpha-L-fucosidase 1 (FUCA1), mRNA. [Source:RefSeq mRNA;Acc:NM_001046035]	Alpha_L_fucos
ENSBTAG00000004971	437.5214527	506.8178046	456.7672988	796.479437	771.4089119	939.1853519	467.0355187	835.6912336	-0.839725241	1.39E-09	5.02E-08	GRAMD1C	1	58518934	58618308	+	3757	protein_coding	Bos taurus GRAM domain containing 1C (GRAMD1C), mRNA. [Source:RefSeq mRNA;Acc:NM_001103229]	-
ENSBTAG00000018255	5188.885645	5127.156844	5013.749988	3333.749159	3319.795252	3650.657259	5109.930826	3434.73389	0.573050279	1.42E-09	5.13E-08	ACTN1	10	80672883	80775228	-	3624	protein_coding	Bos taurus actinin alpha 1 (ACTN1), mRNA. [Source:RefSeq mRNA;Acc:NM_001035351]	CH
ENSBTAG00000018848	991.8472752	1010.636687	1132.199794	1724.699791	1585.392297	1903.67518	1044.894585	1737.922423	-0.734029178	1.48E-09	5.34E-08	FBXL3	12	52117531	52129926	-	3036	protein_coding	Bos taurus F-box and leucine rich repeat protein 3 (FBXL3), mRNA. [Source:RefSeq mRNA;Acc:NM_001102246]	-
ENSBTAG00000021378	585.0117162	730.7373081	708.4752358	1236.956701	1407.998658	2459.400398	674.74142	1701.451919	-1.334487022	1.49E-09	5.37E-08	S100A13	3	16756363	16772529	+	1065	protein_coding	S100 calcium binding protein A13 [Source:VGNC Symbol;Acc:VGNC:34239]	-
ENSBTAG00000000405	470.1870815	431.8447566	510.2187912	880.9545288	929.5426705	1599.048221	470.7502098	1136.51514	-1.271708629	1.51E-09	5.40E-08	VKORC1	25	27201063	27204251	-	1716	protein_coding	vitamin K epoxide reductase complex subunit 1 [Source:NCBI gene;Acc:445422]	-
ENSBTAG00000001136	1535.284555	1432.485038	1504.41655	2153.109185	2357.814887	2366.941737	1490.728714	2292.621936	-0.62098098	1.61E-09	5.75E-08	KIAA1324	3	34200677	34215659	-	1533	protein_coding	KIAA1324 [Source:VGNC Symbol;Acc:VGNC:30567]	-
novel.1671	1625.362501	1688.393041	1718.22252	1014.706757	950.8299072	1141.621158	1677.326021	1035.719274	0.695352594	1.63E-09	5.82E-08	-	8	86436986	86450406	+	2115	-	PF07716:Basic region leucine zipper|PF06529:Vertebrate interleukin-3 regulated transcription factor	Vert_IL3-reg_TF
ENSBTAG00000006882	3132.930764	3043.90575	3044.791377	2050.532288	2011.137032	1680.801143	3073.875964	1914.156821	0.683465574	1.65E-09	5.87E-08	IQGAP3	3	14259699	14299013	+	5826	protein_coding	Bos taurus IQ motif containing GTPase activating protein 3 (IQGAP3), mRNA. [Source:RefSeq mRNA;Acc:NM_001098880]	-
ENSBTAG00000044118	76.21980059	84.96945443	84.55054254	20.1131171	22.30091467	18.49173232	81.91326585	20.30192136	2.013385872	1.66E-09	5.90E-08	HMGA2	5	47819505	47966760	-	915	protein_coding	high mobility group AT-hook 2 [Source:VGNC Symbol;Acc:VGNC:29875]	-
ENSBTAG00000000902	3178.464671	3068.896766	3363.556641	5234.438724	5158.607034	4527.554671	3203.639359	4973.533476	-0.63449596	1.67E-09	5.93E-08	OGT	X	79093648	79135279	-	5324	protein_coding	O-linked N-acetylglucosamine (GlcNAc) transferase [Source:NCBI gene;Acc:532053]	TPR_1
ENSBTAG00000052352	184.1153625	190.9313623	267.2574621	443.494232	439.9362257	609.2539174	214.1013956	497.5614584	-1.216457925	1.69E-09	5.96E-08	-	23	7737026	7738241	+	1082	lncRNA	-	-
ENSBTAG00000013143	678.059265	703.7470108	683.2072575	435.4489851	391.2796846	377.6206389	688.3378444	401.4497696	0.778040426	1.78E-09	6.29E-08	BAG4	27	33349063	33374595	+	2669	protein_coding	Bos taurus BCL2 associated athanogene 4 (BAG4), mRNA. [Source:RefSeq mRNA;Acc:NM_001110532]	-
ENSBTAG00000019722	198.9633756	186.9327997	192.4253727	356.0021726	357.8283126	388.3263787	192.7738493	367.3856213	-0.930518492	1.79E-09	6.32E-08	GUCY2C	5	95172751	95238347	+	3984	protein_coding	Bos taurus guanylate cyclase 2C (GUCY2C), mRNA. [Source:RefSeq mRNA;Acc:NM_174547]	Guanylate_cyc
ENSBTAG00000013915	766.157476	795.7139497	854.2520333	472.6582517	440.9499037	506.0895161	805.3744863	473.2325572	0.766940456	1.80E-09	6.32E-08	DSN1	13	65811649	65827589	-	2165	protein_coding	Bos taurus DSN1 homolog, MIS12 kinetochore complex component (DSN1), mRNA. [Source:RefSeq mRNA;Acc:NM_001100323]	-
ENSBTAG00000023736	759.2284032	756.7279647	698.7567826	445.5055437	413.5805993	453.5340663	738.2377169	437.5400698	0.754447513	1.97E-09	6.90E-08	CDC42EP3	11	20086106	20111391	-	2304	protein_coding	Bos taurus CDC42 effector protein 3 (CDC42EP3), mRNA. [Source:RefSeq mRNA;Acc:NM_001046444]	PBD
ENSBTAG00000000454	1381.855086	1226.559066	1435.415533	2148.080906	2224.009399	2867.191758	1347.943228	2413.094021	-0.840169196	2.05E-09	7.16E-08	TMEM106C	5	32318296	32323859	-	1697	protein_coding	Bos taurus transmembrane protein 106C (TMEM106C), mRNA. [Source:RefSeq mRNA;Acc:NM_001034461]	-
ENSBTAG00000021838	555.31569	543.8045083	613.2343947	912.1298603	927.5153146	1036.510259	570.7848644	958.7184779	-0.74816225	2.18E-09	7.59E-08	ESRP1	14	69602149	69660461	-	3568	protein_coding	Bos taurus epithelial splicing regulatory protein 1 (ESRP1), mRNA. [Source:RefSeq mRNA;Acc:NM_001193002]	-
ENSBTAG00000002606	1919.35316	1845.336622	2027.26933	2879.192712	2840.325586	3129.969007	1930.653038	2949.829102	-0.61154877	2.20E-09	7.65E-08	LGR4	15	58091974	58197387	-	5529	protein_coding	Bos taurus leucine rich repeat containing G protein-coupled receptor 4 (LGR4), mRNA. [Source:RefSeq mRNA;Acc:NM_001205511]	7tm_1
ENSBTAG00000013423	452.3694658	464.8328977	526.7401616	857.8244441	811.9560295	1146.487404	481.314175	938.7559591	-0.963897161	2.33E-09	8.10E-08	GLRX5	21	60402134	60412055	+	1045	protein_coding	Bos taurus glutaredoxin 5 (GLRX5), mRNA. [Source:RefSeq mRNA;Acc:NM_001100303]	-
ENSBTAG00000007379	98.98675401	92.96657955	67.05732684	23.13008466	21.28723673	16.54523418	86.3368868	20.32085186	2.088056238	2.50E-09	8.67E-08	ALK	11	70153921	70661150	+	5374	protein_coding	ALK receptor tyrosine kinase [Source:VGNC Symbol;Acc:VGNC:25832]	Pkinase_Tyr
ENSBTAG00000001368	3536.796721	3298.814113	3586.109218	5052.415014	5115.018883	5744.116007	3473.906684	5303.849968	-0.610497372	2.57E-09	8.90E-08	LGALS3BP	19	53416674	53427208	+	2914	protein_coding	galectin 3 binding protein [Source:VGNC Symbol;Acc:VGNC:30853]	SRCR
ENSBTAG00000021969	496.9135051	482.8264293	480.0915864	275.5497042	285.8571789	237.4727729	486.6105069	266.2932187	0.870197046	2.60E-09	8.96E-08	KLHL29	11	75240502	75572709	-	5153	protein_coding	Bos taurus kelch like family member 29 (KLHL29), mRNA. [Source:RefSeq mRNA;Acc:NM_001164494]	BACK
ENSBTAG00000014915	224.6999316	249.9101601	206.0312071	90.50902693	68.93009988	109.9771448	226.8804329	89.80542388	1.335650041	2.60E-09	8.97E-08	ETV5	1	81135305	81194599	+	4008	protein_coding	Bos taurus ETS variant 5 (ETV5), mRNA. [Source:RefSeq mRNA;Acc:NM_001192834]	ETS_PEA3_N
novel.474	49.493377	56.9795165	66.08548153	147.8314107	156.1064027	153.773353	57.51945834	152.5703888	-1.406848864	2.71E-09	9.31E-08	-	15	52672072	52677070	+	4999	-	-	-
ENSBTAG00000021766	1015.604096	1083.610454	1109.847352	459.5847256	433.8541581	679.3278504	1069.687301	524.2555781	1.028402519	2.82E-09	9.68E-08	HBEGF	7	51533600	51544783	-	1602	protein_coding	Bos taurus heparin binding EGF like growth factor (HBEGF), mRNA. [Source:RefSeq mRNA;Acc:NM_001144090]	-
ENSBTAG00000019110	976.9992621	943.6607644	977.6763885	1440.099184	1481.997147	1632.138689	966.1121383	1518.07834	-0.652056728	2.90E-09	9.91E-08	PNRC1	9	61031143	61035355	-	1947	protein_coding	proline rich nuclear receptor coactivator 1 [Source:VGNC Symbol;Acc:VGNC:33098]	-
ENSBTAG00000004085	203.9127133	191.9310029	215.7496603	98.55427377	85.14894691	77.85992555	203.8644588	87.18771541	1.226087451	2.94E-09	1.00E-07	ASF1B	7	11577424	11589850	+	1735	protein_coding	Bos taurus anti-silencing function 1B histone chaperone (ASF1B), mRNA. [Source:RefSeq mRNA;Acc:NM_001075453]	-
ENSBTAG00000014628	7.918940321	13.99496896	10.69029848	50.28279274	70.95745576	68.12743486	10.86806926	63.12256112	-2.538993961	2.96E-09	1.01E-07	OAS2	17	61338202	61357849	-	2155	protein_coding	2'-5'-oligoadenylate synthetase 2 [Source:VGNC Symbol;Acc:VGNC:32391]	-
ENSBTAG00000011931	3682.307249	3813.629043	4570.588524	6822.369319	7225.496352	11269.25097	4022.174939	8439.038882	-1.069117281	2.98E-09	1.01E-07	CD63	5	57528943	57532768	+	992	protein_coding	Bos taurus CD63 molecule (CD63), mRNA. [Source:RefSeq mRNA;Acc:NM_205803]	Tetraspannin
ENSBTAG00000017060	77.20966813	85.96909507	73.86024406	186.0463331	172.3252497	228.7135313	79.01300242	195.695038	-1.309267175	3.05E-09	1.03E-07	ITGB2	1	144759527	144789479	-	4046	protein_coding	integrin subunit beta 2 [Source:VGNC Symbol;Acc:VGNC:30327]	-
ENSBTAG00000008921	859.2050248	859.6909507	787.1947064	512.8844859	470.3465639	370.8078954	835.3635606	451.3463151	0.888511829	3.07E-09	1.04E-07	NEXN	3	66742753	66798302	-	3807	protein_coding	nexilin F-actin binding protein [Source:VGNC Symbol;Acc:VGNC:32025]	-
ENSBTAG00000019794	1607.544885	1518.454133	1857.1964	2724.321711	2609.207016	3335.324561	1661.065139	2889.617763	-0.798779251	3.10E-09	1.05E-07	SYPL1	4	47151949	47180223	-	1055	protein_coding	synaptophysin like 1 [Source:VGNC Symbol;Acc:VGNC:53679]	-
ENSBTAG00000046545	1239.31416	1250.550441	1104.01628	640.6027795	685.2462871	421.416847	1197.960294	582.4219712	1.040787145	3.16E-09	1.07E-07	MEF2D	3	14329333	14359887	+	3794	protein_coding	Bos taurus myocyte enhancer factor 2D (MEF2D), mRNA. [Source:RefSeq mRNA;Acc:NM_001205178]	SRF-TF
ENSBTAG00000002900	131.6523828	152.945018	179.7913836	340.9173348	305.1170598	481.7582893	154.7962615	375.9308946	-1.280259599	3.18E-09	1.07E-07	-	10	98287119	98288935	+	1817	protein_coding	-	-
novel.1327	71.27046289	82.97017314	103.9874489	281.5836393	185.5030629	221.9007878	86.0760283	229.6624967	-1.415343066	3.19E-09	1.07E-07	-	3	27240365	27249586	-	9222	-	-	-
ENSBTAG00000053050	736.4614498	748.7308396	808.5753034	1710.620609	1733.389276	1126.049173	764.5891976	1523.35302	-0.994305649	3.40E-09	1.14E-07	-	4	10449812	10468917	-	5595	pseudogene	-	SAM_2
ENSBTAG00000032680	2221.26276	2130.234204	2017.550877	1241.984981	1460.709911	1170.81863	2123.015947	1291.171174	0.717555628	3.41E-09	1.14E-07	TMEM63B	23	17658530	17683153	+	4331	protein_coding	Bos taurus transmembrane protein 63B (TMEM63B), mRNA. [Source:RefSeq mRNA;Acc:NM_001163939]	-
ENSBTAG00000015094	21.77708588	18.99317217	22.35244228	75.42418911	78.05320134	96.35165787	21.04090011	83.27634944	-1.984737365	3.44E-09	1.15E-07	VNN1	9	70835488	70854194	-	1803	protein_coding	Bos taurus vanin 1 (VNN1), mRNA. [Source:RefSeq mRNA;Acc:NM_001024556]	CN_hydrolase
ENSBTAG00000018045	2096.53945	2161.223064	1948.54986	1377.748521	1261.015357	1072.520474	2068.770791	1237.094784	0.741937649	3.45E-09	1.15E-07	SLC12A4	18	35425222	35447046	-	3781	protein_coding	Bos taurus solute carrier family 12 member 4 (SLC12A4), mRNA. [Source:RefSeq mRNA;Acc:NM_001174091]	AA_permease
ENSBTAG00000008204	1793.639983	1943.301405	2133.20047	1288.24515	1211.345138	1129.94217	1956.713952	1209.844152	0.693738699	3.56E-09	1.18E-07	CARNMT1	8	51058247	51098110	-	1590	protein_coding	carnosine N-methyltransferase 1 [Source:VGNC Symbol;Acc:VGNC:26771]	-
ENSBTAG00000027317	2163.850443	2242.193956	2505.417226	3470.518355	3453.60074	3736.303177	2303.820542	3553.474091	-0.625186824	3.57E-09	1.18E-07	RNF114	13	78003747	78017910	+	2461	protein_coding	Bos taurus ring finger protein 114 (RNF114), mRNA. [Source:RefSeq mRNA;Acc:NM_001024531]	-
ENSBTAG00000005589	467.2174789	503.8188827	486.8945036	838.7169829	782.5593693	1064.734482	485.9769551	895.3369447	-0.881807007	3.79E-09	1.25E-07	STK19	23	27387692	27396606	-	2388	protein_coding	Bos taurus serine/threonine kinase 19 (STK19), mRNA. [Source:RefSeq mRNA;Acc:NM_001097997]	-
ENSBTAG00000000816	143.5307933	102.962986	136.0583443	47.26582517	37.50608376	38.92996278	127.5173745	41.23395724	1.629239724	3.88E-09	1.28E-07	PRDM1	9	43843907	43866544	-	5269	protein_coding	Bos taurus PR/SET domain 1 (PRDM1), mRNA. [Source:RefSeq mRNA;Acc:NM_001192936]	SET
ENSBTAG00000031383	177.1862897	181.9345965	171.0447757	322.8155294	354.7872788	336.744178	176.7218873	338.1156621	-0.936112872	3.92E-09	1.29E-07	SMIM24	7	20433050	20436476	+	1263	protein_coding	Bos taurus small integral membrane protein 24 (SMIM24), mRNA. [Source:RefSeq mRNA;Acc:NM_001206717]	-
ENSBTAG00000007799	627.5760204	716.7423391	730.8276781	352.985205	287.8845348	419.4703489	691.7153459	353.4466962	0.968202261	4.00E-09	1.32E-07	MTFR2	9	74232905	74250570	-	2351	protein_coding	Bos taurus mitochondrial fission regulator 2 (MTFR2), mRNA. [Source:RefSeq mRNA;Acc:NM_001017948]	-
ENSBTAG00000008934	755.2689331	682.7545573	737.6305953	376.1152897	427.7720905	452.5608173	725.2180286	418.8160658	0.791937447	4.08E-09	1.34E-07	ESPL1	5	26730162	26752001	-	6638	protein_coding	Bos taurus extra spindle pole bodies like 1, separase (ESPL1), mRNA. [Source:RefSeq mRNA;Acc:NM_001045949]	-
ENSBTAG00000006972	449.3998632	459.8346945	465.5139066	212.1933854	192.5988085	277.3759848	458.2494881	227.3893929	1.010191314	4.09E-09	1.34E-07	TRIP13	20	71375341	71390362	-	2560	protein_coding	thyroid hormone receptor interactor 13 [Source:VGNC Symbol;Acc:VGNC:36359]	AAA
novel.835	2148.012562	2210.205456	2671.602775	4042.736536	3687.760344	3702.23946	2343.273598	3810.912113	-0.701541655	4.17E-09	1.36E-07	-	2	5234028	5242682	-	8655	-	-	-
ENSBTAG00000006747	2720.156	2650.047337	2481.121093	4023.629075	4073.971639	3698.346464	2617.108144	3931.982392	-0.587272228	4.25E-09	1.39E-07	LTBP3	29	43714477	43735238	-	5774	protein_coding	Bos taurus latent transforming growth factor beta binding protein 3 (LTBP3), mRNA. [Source:RefSeq mRNA;Acc:NM_001192738]	EGF_CA
ENSBTAG00000004751	71.27046289	76.9723293	92.32530507	15.08483782	24.32827055	16.54523418	80.18936575	18.65278085	2.105670746	4.28E-09	1.39E-07	SPTBN4	18	49799380	49880032	+	9037	protein_coding	spectrin beta, non-erythrocytic 4 [Source:VGNC Symbol;Acc:VGNC:35254]	CH
ENSBTAG00000009072	591.940789	610.7804312	545.2052226	937.2712567	1064.361836	916.8006234	582.6421476	972.8112388	-0.739547521	4.39E-09	1.42E-07	ZNF572	14	15178243	15192599	-	4565	protein_coding	Bos taurus zinc finger protein 572 (ZNF572), mRNA. [Source:RefSeq mRNA;Acc:NM_001077064]	zf-C2H2
ENSBTAG00000018424	295.9703945	336.8788958	260.4545448	124.701326	131.7781321	155.7198511	297.767945	137.3997697	1.114988255	4.47E-09	1.45E-07	ACKR3	3	116025262	116037482	+	1729	protein_coding	Bos taurus atypical chemokine receptor 3 (ACKR3), mRNA. [Source:RefSeq mRNA;Acc:NM_001098381]	7tm_1
ENSBTAG00000015172	1416.50045	1404.4951	1487.89518	750.2192677	780.5320134	978.1153147	1436.29691	836.2888653	0.780037269	4.64E-09	1.50E-07	MCM6	2	61489617	61524285	+	3534	protein_coding	Bos taurus minichromosome maintenance complex component 6 (MCM6), mRNA. [Source:RefSeq mRNA;Acc:NM_001046234]	MCM
ENSBTAG00000015516	196.9836405	195.9295655	252.6797823	388.1831599	442.9772595	545.9927279	215.1976628	459.0510491	-1.092932714	4.66E-09	1.50E-07	CCDC28A	9	76538594	76553785	+	808	protein_coding	coiled-coil domain containing 28A [Source:VGNC Symbol;Acc:VGNC:53785]	-
ENSBTAG00000012181	1326.422504	1320.525286	1218.694027	851.790509	823.1064868	752.3215306	1288.547272	809.0728422	0.671502479	4.82E-09	1.55E-07	GNA11	7	20694784	20713444	-	3422	protein_coding	G protein subunit alpha 11 [Source:VGNC Symbol;Acc:VGNC:29444]	G-alpha
novel.1440	5937.225505	5967.854623	6137.203174	8396.220732	8793.656125	8459.480911	6014.094434	8549.785922	-0.507528359	4.96E-09	1.59E-07	-	5	115611557	115617562	+	6006	-	-	-
ENSBTAG00000004742	551.3562198	573.7937275	466.4857519	257.4478988	218.9544349	113.8701411	530.5452331	196.7574916	1.431786426	5.17E-09	1.66E-07	RUNX1	1	146975141	147244722	-	2406	protein_coding	runt related transcription factor 1 [Source:VGNC Symbol;Acc:VGNC:49959]	Runt
ENSBTAG00000011779	3882.260492	3825.62473	4298.471835	6098.297103	5978.672487	7437.569388	4002.119019	6504.846326	-0.700768494	5.39E-09	1.73E-07	MAL2	14	44987026	45020255	-	2823	protein_coding	Bos taurus mal, T cell differentiation protein 2 (MAL2), mRNA. [Source:RefSeq mRNA;Acc:NM_001081719]	-
ENSBTAG00000004448	2900.311892	2932.945639	2805.717429	1894.65563	1957.412101	1598.074972	2879.65832	1816.714234	0.664681004	5.47E-09	1.75E-07	CKAP5	15	76674259	76779196	-	6663	protein_coding	Bos taurus cytoskeleton associated protein 5 (CKAP5), mRNA. [Source:RefSeq mRNA;Acc:NM_001191363]	-
ENSBTAG00000017026	748.3398603	905.6744201	958.2394821	437.4602968	510.8936815	507.0627651	870.7512542	485.1389145	0.843849812	5.81E-09	1.85E-07	DEPDC1B	20	18560198	18649542	+	1404	protein_coding	Bos taurus DEP domain containing 1B (DEPDC1B), mRNA. [Source:RefSeq mRNA;Acc:NM_001191451]	RhoGAP
ENSBTAG00000001457	170.2572169	200.9277687	168.1292398	394.2170951	330.4590083	345.5034196	179.7714085	356.7265077	-0.988904803	5.84E-09	1.86E-07	TMEM267	20	31333365	31353178	+	2462	protein_coding	Bos taurus transmembrane protein 267 (TMEM267), mRNA. [Source:RefSeq mRNA;Acc:NM_001079795]	-
ENSBTAG00000033545	103.9360917	109.9604704	118.5651286	246.3856844	241.2553496	450.6143191	110.8205636	312.7517844	-1.497230147	6.01E-09	1.91E-07	EBD	27	7165176	7180420	+	776	protein_coding	enteric beta-defensin [Source:NCBI gene;Acc:281743]	-
ENSBTAG00000000396	849.3063494	912.6719046	839.6743535	504.8392391	543.3313756	552.8054714	867.2175358	533.6586954	0.700332116	6.28E-09	1.99E-07	PIM1	23	11066555	11071948	+	2758	protein_coding	Bos taurus Pim-1 proto-oncogene, serine/threonine kinase (PIM1), mRNA. [Source:RefSeq mRNA;Acc:NM_174144]	Pkinase
ENSBTAG00000000607	471.1769491	533.8081019	475.2323598	276.5553601	270.6520098	287.1084755	493.4058036	278.1052818	0.826898096	6.38E-09	2.02E-07	ABCF2	4	113788348	113803468	-	3348	protein_coding	ATP binding cassette subfamily F member 2 [Source:VGNC Symbol;Acc:VGNC:25481]	ABC_tran
ENSBTAG00000006404	432.572115	465.8325384	434.4148565	179.0067422	238.2143158	253.044758	444.27317	223.4219387	0.99126106	6.50E-09	2.05E-07	CENPT	18	35338638	35344538	-	2069	protein_coding	Bos taurus centromere protein T (CENPT), mRNA. [Source:RefSeq mRNA;Acc:NM_001101969]	-
ENSBTAG00000007749	354.3725794	455.836132	377.0759828	194.09158	214.8997232	155.7198511	395.7615647	188.2370514	1.072620408	6.73E-09	2.12E-07	TONSL	14	496271	507275	+	4211	protein_coding	Bos taurus tonsoku like, DNA repair protein (TONSL), mRNA. [Source:RefSeq mRNA;Acc:NM_001075188]	-
ENSBTAG00000002002	3002.268249	2986.926233	3596.799517	2104.837704	1987.822439	1935.792399	3195.331333	2009.484181	0.669213235	6.98E-09	2.19E-07	ATAD2	14	16473279	16519326	+	4588	protein_coding	ATPase family, AAA domain containing 2 [Source:VGNC Symbol;Acc:VGNC:26233]	AAA
ENSBTAG00000054162	186.0950975	172.9378308	169.1010851	338.9060231	317.2811951	349.3964159	176.0446711	335.1945447	-0.929281028	7.36E-09	2.31E-07	HOXB8	19	37878104	37881003	+	2111	protein_coding	homeobox B8 [Source:NCBI gene;Acc:785855]	Homeobox
ENSBTAG00000012961	1723.359387	1702.38801	1856.224555	2574.478988	2672.055048	3082.279803	1760.657317	2776.27128	-0.657069545	7.47E-09	2.34E-07	PAPSS1	6	17489062	17601500	+	2743	protein_coding	Bos taurus 3'-phosphoadenosine 5'-phosphosulfate synthase 1 (PAPSS1), mRNA. [Source:RefSeq mRNA;Acc:NM_001034210]	-
ENSBTAG00000035907	3671.418706	3619.698759	3712.449109	5227.399133	5512.380635	5104.691369	3667.855525	5281.490379	-0.525978698	7.49E-09	2.34E-07	DDX3X	X	102219297	102232936	-	3141	protein_coding	DEAD-box helicase 3 X-linked [Source:VGNC Symbol;Acc:VGNC:56526]	DEAD
ENSBTAG00000016194	199.9532431	172.9378308	191.4535274	350.9738933	404.4574978	338.6906761	188.1148671	364.7073558	-0.954762679	7.75E-09	2.42E-07	FBXO32	14	16328949	16361047	+	1492	protein_coding	F-box protein 32 [Source:VGNC Symbol;Acc:VGNC:28905]	-
ENSBTAG00000014567	236.5783421	216.9220189	232.2710307	121.6843584	78.05320134	82.7261709	228.5904639	94.15457689	1.280055905	7.85E-09	2.44E-07	MYLK	1	67982278	68068472	-	3998	protein_coding	Bos taurus myosin light chain kinase (MYLK), mRNA. [Source:RefSeq mRNA;Acc:NM_176636]	Pkinase
ENSBTAG00000021105	1776.812234	1802.352074	2007.832424	2791.700653	2756.190317	3122.183015	1862.332244	2890.024662	-0.633978302	7.87E-09	2.45E-07	IRAK4	5	36680680	36708918	-	2735	protein_coding	Bos taurus interleukin 1 receptor associated kinase 4 (IRAK4), mRNA. [Source:RefSeq mRNA;Acc:NM_001075998]	Pkinase
ENSBTAG00000000629	531.558869	566.796243	605.4596322	269.5157691	297.0076363	154.746602	567.9382481	240.4233358	1.240968461	7.93E-09	2.46E-07	MMS22L	9	52495548	52617857	+	4032	protein_coding	Bos taurus MMS22 like, DNA repair protein (MMS22L), mRNA. [Source:RefSeq mRNA;Acc:NM_001206012]	-
ENSBTAG00000000251	1335.331312	1243.552957	1058.33955	1987.175969	2109.463792	2978.142152	1212.407939	2358.260638	-0.959994611	8.14E-09	2.52E-07	ALAD	8	102642378	102652291	-	1208	protein_coding	Bos taurus aminolevulinate dehydratase (ALAD), mRNA. [Source:RefSeq mRNA;Acc:NM_001014895]	-
ENSBTAG00000014558	1351.169192	1380.503724	1356.696062	904.0846135	906.2280779	901.2286382	1362.789659	903.8471099	0.592410178	8.44E-09	2.61E-07	DDX21	28	25219711	25243112	+	3254	protein_coding	Bos taurus DExD-box helicase 21 (DDX21), mRNA. [Source:RefSeq mRNA;Acc:NM_001083527]	DEAD
ENSBTAG00000020796	222.7201965	197.9288468	257.5390089	432.4320176	411.5532434	437.9620812	226.0626841	427.3157807	-0.918241652	8.48E-09	2.62E-07	UBE2D1	26	666753	703300	-	1519	protein_coding	Bos taurus ubiquitin conjugating enzyme E2 D1 (UBE2D1), mRNA. [Source:RefSeq mRNA;Acc:NM_001038167]	UQ_con
ENSBTAG00000000295	290.0311892	312.8875204	356.6672312	565.1785904	549.4134432	577.1366981	319.8619803	563.9095772	-0.817847381	8.70E-09	2.68E-07	CLHC1	11	37932812	37970086	-	3609	protein_coding	Bos taurus clathrin heavy chain linker domain containing 1 (CLHC1), mRNA. [Source:RefSeq mRNA;Acc:NM_001102042]	-
ENSBTAG00000010181	348.4333741	367.8677556	353.7516952	197.1085475	185.5030629	196.596312	356.684275	193.0693075	0.885366577	8.90E-09	2.73E-07	GRPEL1	6	113520832	113543245	-	1933	protein_coding	Bos taurus GrpE like 1, mitochondrial (GRPEL1), mRNA. [Source:RefSeq mRNA;Acc:NM_001034501]	-
ENSBTAG00000017530	575.1130408	597.7851029	693.897556	1106.22144	1010.636906	1487.124578	622.2652332	1201.327641	-0.949119983	8.94E-09	2.74E-07	PLGRKT	8	39279965	39316564	+	1550	protein_coding	plasminogen receptor with a C-terminal lysine [Source:VGNC Symbol;Acc:VGNC:33028]	-
ENSBTAG00000009495	2202.455277	2114.239954	1911.619738	3496.665407	3160.647815	3035.563847	2076.10499	3230.959023	-0.638094414	9.45E-09	2.89E-07	BCAM	18	52562406	52574348	+	2992	protein_coding	basal cell adhesion molecule [Source:VGNC Symbol;Acc:VGNC:49138]	-
ENSBTAG00000007253	993.8270102	1055.620516	898.9569178	1563.794854	1681.691702	2311.46654	982.8014814	1852.317699	-0.914545457	9.58E-09	2.93E-07	TSPAN33	4	93068851	93088762	+	2109	protein_coding	Bos taurus tetraspanin 33 (TSPAN33), mRNA. [Source:RefSeq mRNA;Acc:NM_001034672]	Tetraspannin
ENSBTAG00000006587	338.5346987	344.8760209	370.2730656	202.1368268	180.4346732	172.2650853	351.2279284	184.9455284	0.925661709	9.68E-09	2.95E-07	ZNF367	8	83091018	83115232	-	1830	protein_coding	Bos taurus zinc finger protein 367 (ZNF367), mRNA. [Source:RefSeq mRNA;Acc:NM_001206033]	-
ENSBTAG00000009383	1893.616604	1814.347762	2097.242193	1282.211215	1261.015357	1228.240326	1935.068853	1257.155632	0.62231876	1.00E-08	3.04E-07	KIF11	26	14004835	14050631	+	4242	protein_coding	kinesin family member 11 [Source:VGNC Symbol;Acc:VGNC:30580]	Kinesin
novel.914	127.6929127	172.9378308	121.4806646	288.6232303	295.9939583	325.0651892	140.7038027	303.2274593	-1.108456177	1.01E-08	3.06E-07	-	21	29265928	29319200	+	8867	-	PF17919:RNase H-like domain found in reverse transcriptase|PF00665:Integrase core domain|PF00075:RNase H	rve
ENSBTAG00000045989	323.6866856	288.896145	236.1584119	135.7635404	112.5182513	137.2281188	282.9137475	128.5033035	1.137958806	1.01E-08	3.06E-07	CDC42EP5	18	62891327	62891788	-	462	protein_coding	CDC42 effector protein 5 [Source:VGNC Symbol;Acc:VGNC:27076]	PBD
ENSBTAG00000002317	372.1901951	361.8699118	368.329375	181.0180539	153.0653689	216.0612934	367.4631606	183.381572	1.001966942	1.01E-08	3.06E-07	PTN	4	100885905	100995239	-	1392	protein_coding	Bos taurus pleiotrophin (PTN), mRNA. [Source:RefSeq mRNA;Acc:NM_173955]	-
ENSBTAG00000004237	183.1254949	229.9173473	257.5390089	439.4716085	409.5258875	530.4207428	223.5272837	459.8060796	-1.04063174	1.03E-08	3.10E-07	BTC	6	89681975	89731873	-	3360	protein_coding	Bos taurus betacellulin (BTC), mRNA. [Source:RefSeq mRNA;Acc:NM_173896]	-
ENSBTAG00000032719	1144.286876	1071.614766	1198.285275	624.5122858	673.0821518	415.5773526	1138.062306	571.0572634	0.995291154	1.04E-08	3.15E-07	TFRC	1	70652654	70679923	-	2598	protein_coding	Bos taurus transferrin receptor (TFRC), mRNA. [Source:RefSeq mRNA;Acc:NM_001206577]	TFR_dimer
ENSBTAG00000020884	1511.527734	1563.437961	1582.164175	2246.63518	2294.966855	2611.227253	1552.376624	2384.276429	-0.619144693	1.12E-08	3.36E-07	CASP4	15	3250231	3269687	+	2013	protein_coding	Bos taurus caspase 4, apoptosis-related cysteine peptidase (CASP4), mRNA. [Source:RefSeq mRNA;Acc:NM_176638]	Peptidase_C14
ENSBTAG00000000642	804.7623101	886.6812479	827.0403644	522.9410445	523.0578168	426.2830924	839.4946408	490.7606512	0.774808069	1.13E-08	3.39E-07	INTS1	25	41429465	41453280	+	6766	protein_coding	Bos taurus integrator complex subunit 1 (INTS1), mRNA. [Source:RefSeq mRNA;Acc:NM_001191470]	-
ENSBTAG00000008908	924.5362824	935.6636393	862.0267958	572.2181814	577.7964255	480.7850403	907.4089059	543.5998824	0.739454806	1.17E-08	3.50E-07	GZF1	13	42029073	42035720	+	2691	protein_coding	GDNF inducible zinc finger protein 1 [Source:VGNC Symbol;Acc:VGNC:29732]	BTB
ENSBTAG00000015924	1687.724156	1676.397354	2008.804269	2783.655406	2722.738945	2916.827461	1790.97526	2807.740604	-0.648612067	1.25E-08	3.74E-07	CALB1	14	73654320	73676317	+	2616	protein_coding	Bos taurus calbindin 1 (CALB1), mRNA. [Source:RefSeq mRNA;Acc:NM_001076195]	-
ENSBTAG00000020757	5385.869286	5549.005194	5587.138725	8163.914229	8257.420495	10671.67605	5507.337735	9031.00359	-0.713560842	1.29E-08	3.85E-07	PCBP2	5	26540444	26559860	-	2969	protein_coding	poly(rC) binding protein 2 [Source:VGNC Symbol;Acc:VGNC:49069]	KH_1
ENSBTAG00000009568	1241.293895	1233.55655	1283.807663	2111.877295	2081.08081	1751.848325	1252.886036	1981.602143	-0.661284062	1.33E-08	3.96E-07	KANK2	7	15601585	15628102	-	5174	protein_coding	Bos taurus KN motif and ankyrin repeat domains 2 (KANK2), mRNA. [Source:RefSeq mRNA;Acc:NM_001076531]	-
ENSBTAG00000006984	2232.151303	2178.216955	2370.330727	3755.118962	3608.693464	3134.835252	2260.232995	3499.549226	-0.6306118	1.36E-08	4.03E-07	-	16	5250021	5279400	+	5853	protein_coding	CD55 molecule (Cromer blood group) [Source:NCBI gene;Acc:518609]	Sushi
ENSBTAG00000003971	185.10523	188.932081	157.4389413	66.37328642	79.06687928	77.85992555	177.1587508	74.43336375	1.250622018	1.38E-08	4.09E-07	E2F1	13	63129139	63138330	-	2207	protein_coding	Bos taurus E2F transcription factor 1 (E2F1), mRNA. [Source:RefSeq mRNA;Acc:NM_001206079]	E2F_TDP
ENSBTAG00000051975	464.2478763	400.8558968	437.3303925	232.3065025	232.1322481	152.8001039	434.1447218	205.7462848	1.078153475	1.38E-08	4.09E-07	-	5	44983558	45019012	+	285	protein_coding	-	-
ENSBTAG00000008926	2203.445144	2315.167723	2137.087851	1473.285827	1513.421164	1268.143537	2218.566906	1418.283509	0.645598862	1.38E-08	4.09E-07	FUBP1	3	66707375	66737434	+	2598	protein_coding	Bos taurus far upstream element binding protein 1 (FUBP1), mRNA. [Source:RefSeq mRNA;Acc:NM_001076846]	KH_1
novel.1424	1047.279857	1211.564456	1255.624149	2009.300398	1737.443988	2309.520042	1171.489487	2018.754809	-0.785194714	1.39E-08	4.10E-07	-	5	74499520	74501500	+	1981	-	-	-
ENSBTAG00000011648	181.1457598	190.9313623	162.2981679	308.7363474	373.0334817	359.1289066	178.1250967	346.9662452	-0.962225439	1.39E-08	4.10E-07	TMLHE	X	35551796	35602890	+	1468	protein_coding	Bos taurus trimethyllysine hydroxylase, epsilon (TMLHE), mRNA. [Source:RefSeq mRNA;Acc:NM_001076064]	-
ENSBTAG00000007435	1503.608793	1591.427899	1347.949454	782.400255	754.176387	999.5267943	1480.995382	845.3678121	0.808604578	1.44E-08	4.24E-07	NOLC1	26	22820386	22829196	+	2554	protein_coding	Bos taurus nucleolar and coiled-body phosphoprotein 1 (NOLC1), mRNA. [Source:RefSeq mRNA;Acc:NM_001075608]	-
ENSBTAG00000032982	1872.829386	2024.272297	2185.680117	1074.040453	1083.621717	1394.665916	2027.593933	1184.109362	0.77580041	1.47E-08	4.32E-07	TERF1	14	36382236	36425376	+	2423	protein_coding	Bos taurus telomeric repeat binding factor 1 (TERF1), mRNA. [Source:RefSeq mRNA;Acc:NM_001076865]	Myb_DNA-binding
ENSBTAG00000011088	1592.696872	1494.462757	1538.431136	2941.543375	2884.927416	2144.0677	1541.863588	2656.846164	-0.784942183	1.49E-08	4.37E-07	SLC6A6	22	57784828	57868863	-	6785	protein_coding	solute carrier family 6 member 6 [Source:VGNC Symbol;Acc:VGNC:34922]	SNF
ENSBTAG00000034529	710.7248938	615.7786344	490.7818849	287.6175745	339.5821097	227.7402822	605.7618044	284.9799888	1.088272456	1.49E-08	4.37E-07	HMGA1	23	8313843	8322713	+	2276	protein_coding	Bos taurus high mobility group AT-hook 1 (HMGA1), mRNA. [Source:RefSeq mRNA;Acc:NM_001076523]	-
ENSBTAG00000005129	1186.851181	1300.532473	1322.681476	731.1118064	687.273643	866.1916717	1270.02171	761.525707	0.737639983	1.51E-08	4.39E-07	CEP55	26	14823940	14845414	+	2709	protein_coding	centrosomal protein 55 [Source:VGNC Symbol;Acc:VGNC:27206]	-
ENSBTAG00000008703	913.6477395	970.6510617	1060.28324	1751.852499	1567.146094	1456.953857	981.5273472	1591.98415	-0.697583432	1.51E-08	4.39E-07	EIF2AK2	11	19556770	19597286	-	2250	protein_coding	Bos taurus eukaryotic translation initiation factor 2 alpha kinase 2 (EIF2AK2), mRNA. [Source:RefSeq mRNA;Acc:NM_178109]	Pkinase
ENSBTAG00000006533	375.1597977	385.8612872	311.9623466	185.0406773	177.3936394	193.6765648	357.6611438	185.3702938	0.9477473	1.52E-08	4.42E-07	NSFL1C	13	59707107	59727653	+	1516	protein_coding	Bos taurus NSFL1 cofactor (NSFL1C), mRNA. [Source:RefSeq mRNA;Acc:NM_001034557]	UBX
ENSBTAG00000038477	2875.565204	2827.983371	2800.858202	4017.59514	4037.479233	3993.240932	2834.802259	4016.105101	-0.502549827	1.54E-08	4.46E-07	GGCX	11	49449754	49463257	+	4063	protein_coding	gamma-glutamyl carboxylase [Source:VGNC Symbol;Acc:VGNC:29339]	VKG_Carbox
ENSBTAG00000014269	581.052246	623.7757595	553.9518304	305.7193799	345.6641774	362.0486538	586.2599453	337.810737	0.795022328	1.57E-08	4.54E-07	SCARB1	17	50929375	51022457	+	2578	protein_coding	Bos taurus scavenger receptor class B member 1 (SCARB1), mRNA. [Source:RefSeq mRNA;Acc:NM_174597]	-
ENSBTAG00000017867	345.4637715	439.8418817	445.105155	712.0043452	694.3693885	840.8871959	410.1369361	749.0869766	-0.869149436	1.60E-08	4.62E-07	YPEL1	17	72078583	72082958	+	2774	protein_coding	yippee like 1 [Source:VGNC Symbol;Acc:VGNC:37034]	-
ENSBTAG00000032206	67.31099273	78.97161058	85.52238786	24.13574051	18.24620291	11.67898883	77.26833039	18.02031075	2.102942294	1.66E-08	4.80E-07	HEMGN	8	63102557	63121637	-	2181	protein_coding	hemogen [Source:VGNC Symbol;Acc:VGNC:29807]	-
ENSBTAG00000016328	1897.576074	1876.325482	1777.505084	1274.165968	1166.743308	1009.259285	1850.46888	1150.056187	0.686323397	1.67E-08	4.80E-07	SFPQ	3	110557888	110571478	+	2883	protein_coding	Bos taurus splicing factor proline and glutamine rich (SFPQ), mRNA. [Source:RefSeq mRNA;Acc:NM_001206291]	RRM_1
ENSBTAG00000006072	748.3398603	748.7308396	687.0946388	470.64694	411.5532434	437.9620812	728.0551129	440.0540882	0.726260358	1.67E-08	4.80E-07	LRRC59	19	36285469	36297388	+	1601	protein_coding	leucine rich repeat containing 59 [Source:VGNC Symbol;Acc:VGNC:55843]	-
ENSBTAG00000000786	741.4107875	758.727246	682.2354122	1105.215784	1188.030545	1452.087612	727.4578152	1248.444647	-0.779431194	1.70E-08	4.88E-07	NQO2	23	50621892	50632743	-	1429	protein_coding	Bos taurus N-ribosyldihydronicotinamide:quinone reductase 2 (NQO2), mRNA. [Source:RefSeq mRNA;Acc:NM_001034323]	Flavodoxin_2
ENSBTAG00000014453	433.5619826	382.8623652	376.1041375	221.2442881	203.7492658	224.820535	397.5094951	216.6046963	0.875673631	1.70E-08	4.88E-07	PLK1	25	21334598	21345432	+	2465	protein_coding	polo like kinase 1 [Source:VGNC Symbol;Acc:VGNC:33033]	Pkinase
ENSBTAG00000020773	64.34139011	73.97340738	58.31071899	17.09614953	5.068389697	1.946498139	65.54183883	8.037012456	3.032508216	1.76E-08	5.03E-07	CTSW	29	43995912	43999323	+	1346	protein_coding	cathepsin W [Source:VGNC Symbol;Acc:VGNC:27819]	Peptidase_C1
ENSBTAG00000009526	2592.463087	2533.089383	3161.412815	4288.116565	4388.2118	5405.425331	2762.321762	4693.917899	-0.764908958	1.76E-08	5.03E-07	TMEM59	3	92177759	92203031	+	1159	protein_coding	Bos taurus transmembrane protein 59 (TMEM59), mRNA. [Source:RefSeq mRNA;Acc:NM_001035076]	-
ENSBTAG00000000480	777.046019	806.7099967	726.9402968	424.3867707	507.8526477	444.7748247	770.2321042	459.0047477	0.746857012	1.81E-08	5.15E-07	IFRD2	22	50039840	50066774	+	2203	protein_coding	Bos taurus interferon related developmental regulator 2 (IFRD2), mRNA. [Source:RefSeq mRNA;Acc:NM_001077012]	-
ENSBTAG00000040056	211.8316536	180.9349559	157.4389413	70.39590983	86.16262485	67.15418579	183.4018503	74.57090683	1.298819691	1.84E-08	5.22E-07	LTB4R2	10	20858847	20863172	-	1250	protein_coding	Bos taurus leukotriene B4 receptor 2 (LTB4R2), mRNA. [Source:RefSeq mRNA;Acc:NM_001191287]	7tm_1
ENSBTAG00000024928	1174.97277	1107.601829	1139.002711	1641.230355	1702.978938	1843.333737	1140.52577	1729.18101	-0.600454644	1.98E-08	5.63E-07	TNFRSF1B	16	41499543	41534237	-	4159	protein_coding	TNF receptor superfamily member 1B [Source:VGNC Symbol;Acc:VGNC:36165]	-
ENSBTAG00000006044	386.0483406	374.8652401	409.1468783	676.8063903	603.138374	671.5418579	390.020153	650.4955407	-0.737971159	2.00E-08	5.66E-07	KLHL5	6	58266641	58336226	+	2425	protein_coding	kelch like family member 5 [Source:VGNC Symbol;Acc:VGNC:30668]	BACK
ENSBTAG00000020792	82.15900583	87.96837635	88.43792381	19.10746124	28.3829823	26.27772487	86.18843533	24.58938947	1.809260557	2.00E-08	5.66E-07	TPH2	5	1542142	1644590	+	1476	protein_coding	tryptophan hydroxylase 2 [Source:VGNC Symbol;Acc:VGNC:56230]	-
ENSBTAG00000010826	976.0093945	910.6726233	885.3510834	613.4500714	549.4134432	485.6512856	924.0110337	549.5049334	0.750001295	2.00E-08	5.66E-07	EMSY	15	55854695	55933677	+	5866	protein_coding	Bos taurus EMSY, BRCA2 interacting transcriptional repressor (EMSY), mRNA. [Source:RefSeq mRNA;Acc:NM_001206822]	-
ENSBTAG00000017375	89.08807861	112.9593924	97.18453166	20.1131171	26.35562643	37.95671371	99.74400087	28.14181908	1.823101376	2.03E-08	5.71E-07	FAM241A	6	13332381	13375661	-	2493	protein_coding	Bos taurus family with sequence similarity 241 member A (FAM241A), mRNA. [Source:RefSeq mRNA;Acc:NM_001076961]	-
ENSBTAG00000007237	1479.851972	1508.457726	1492.754406	1054.932992	941.7068058	911.934378	1493.688035	969.5247251	0.623617646	2.14E-08	6.02E-07	BUB1B	10	35786200	35841256	+	3721	protein_coding	Bos taurus BUB1 mitotic checkpoint serine/threonine kinase B (BUB1B), mRNA. [Source:RefSeq mRNA;Acc:NM_001145173]	-
ENSBTAG00000038480	488.9945648	485.8253512	614.2062401	921.180763	864.6672824	930.4261103	529.6753854	905.4247186	-0.773299243	2.15E-08	6.05E-07	FPGT	3	70600177	70608293	-	3392	protein_coding	Bos taurus fucose-1-phosphate guanylyltransferase (FPGT), mRNA. [Source:RefSeq mRNA;Acc:NM_001191283]	-
ENSBTAG00000053398	1393.733496	1285.537863	1547.177744	879.9488729	874.8040618	676.4081032	1408.816368	810.3870126	0.79810158	2.18E-08	6.11E-07	KNL1	10	36179163	36240615	+	7218	protein_coding	kinetochore scaffold 1 [Source:HGNC Symbol;Acc:HGNC:24054]	-
ENSBTAG00000001551	2051.005543	1967.29278	1795.970145	1294.279085	1154.579173	938.2121029	1938.089489	1129.023454	0.77970341	2.18E-08	6.12E-07	PLEKHG3	10	76837233	76885380	+	5385	protein_coding	Bos taurus pleckstrin homology and RhoGEF domain containing G3 (PLEKHG3), mRNA. [Source:RefSeq mRNA;Acc:NM_001037470]	RhoGEF
novel.1795	126.7030451	150.9457367	188.5379914	300.6911006	377.0881935	676.4081032	155.3955911	451.3957991	-1.538576553	2.30E-08	6.42E-07	-	NKLS02001825.1	2815	6514	+	1039	-	PF01248:Ribosomal protein L7Ae/L30e/S12e/Gadd45 family	-
ENSBTAG00000005957	1888.667266	1996.282359	2002.973197	1310.369579	1355.287405	1344.056965	1962.640941	1336.571316	0.554263054	2.30E-08	6.42E-07	CSE1L	13	77193956	77229841	+	3689	protein_coding	Bos taurus chromosome segregation 1 like (CSE1L), mRNA. [Source:RefSeq mRNA;Acc:NM_001014933]	-
ENSBTAG00000011986	66.32112519	84.96945443	77.74762532	232.3065025	147.9969792	209.2485499	76.34606831	196.5173438	-1.364388975	2.36E-08	6.59E-07	PLSCR4	1	122257891	122300144	+	3115	protein_coding	Bos taurus phospholipid scramblase 4 (PLSCR4), mRNA. [Source:RefSeq mRNA;Acc:NM_001081732]	Scramblase
ENSBTAG00000020301	327.6461558	330.8810519	329.4555623	184.0350214	182.4620291	169.3453381	329.32759	178.6141295	0.88293303	2.38E-08	6.61E-07	BLM	21	21840568	21933720	-	4815	protein_coding	BLM RecQ like helicase [Source:VGNC Symbol;Acc:VGNC:57310]	DEAD
novel.1347	73.25019797	88.96801699	99.12822229	17.09614953	29.39666024	23.35797767	87.11547908	23.28359581	1.904210243	2.38E-08	6.61E-07	-	4	38773741	38789025	+	2595	-	-	-
ENSBTAG00000007454	16461.49719	17108.84956	19590.45789	26079.67328	26402.25561	31190.68618	17720.26821	27890.87169	-0.654393969	2.41E-08	6.67E-07	RPL10	X	37450195	37453599	+	1345	protein_coding	60S ribosomal protein L10 [Source:UniProtKB/Swiss-Prot;Acc:Q9XSI3]	-
ENSBTAG00000003889	906.7186667	924.6675923	751.2364297	513.8901418	472.3739198	341.6104234	860.8742296	442.6248283	0.960031232	2.42E-08	6.69E-07	PER1	19	27778418	27788197	-	4637	protein_coding	Bos taurus period circadian regulator 1 (PER1), mRNA. [Source:RefSeq mRNA;Acc:NM_001289772]	-
ENSBTAG00000002631	314.7778777	371.8663182	313.9060372	640.6027795	567.6596461	549.8857242	333.5167444	586.0493833	-0.813362116	2.65E-08	7.32E-07	SCNN1A	5	103993588	104018792	+	3569	protein_coding	Bos taurus sodium channel epithelial 1 alpha subunit (SCNN1A), mRNA. [Source:RefSeq mRNA;Acc:NM_174598]	-
ENSBTAG00000000392	646.3835037	658.763182	743.4616672	1025.768972	1100.854242	1208.775344	682.8694509	1111.799519	-0.703210727	2.67E-08	7.37E-07	ASCC1	28	28177853	28287517	-	1930	protein_coding	Bos taurus activating signal cointegrator 1 complex subunit 1 (ASCC1), mRNA. [Source:RefSeq mRNA;Acc:NM_001076041]	KH_1
ENSBTAG00000002993	671.1301922	735.7355113	748.3208938	1174.606038	1107.949988	1521.188295	718.3955324	1267.914774	-0.81977058	2.72E-08	7.49E-07	-	9	101304152	101319276	-	1097	protein_coding	-	-
ENSBTAG00000005524	1490.740515	1557.440118	1587.023402	2234.567309	2366.937989	2854.53952	1545.068012	2485.348273	-0.685858699	2.82E-08	7.74E-07	HBP1	4	48265379	48296503	+	2640	protein_coding	Bos taurus HMG-box transcription factor 1 (HBP1), mRNA. [Source:RefSeq mRNA;Acc:NM_001046196]	HMG_box
ENSBTAG00000003636	1374.926013	1426.487194	1449.021367	2102.826392	2018.232777	2365.968488	1416.811525	2162.342552	-0.610027037	2.83E-08	7.76E-07	LIPA	26	10952398	11082198	-	3018	protein_coding	Bos taurus lipase A, lysosomal acid type (LIPA), mRNA. [Source:RefSeq mRNA;Acc:NM_001103323]	Abhydrolase_1
ENSBTAG00000019854	798.8231049	890.6798105	876.6044755	557.1333436	531.1672403	521.6615012	855.3691303	536.6540283	0.67262494	2.85E-08	7.81E-07	ABCE1	17	13156554	13187394	-	2391	protein_coding	Bos taurus ATP binding cassette subfamily E member 1 (ABCE1), mRNA. [Source:RefSeq mRNA;Acc:NM_001083685]	ABC_tran
ENSBTAG00000014112	680.039	656.7639007	664.7421965	1117.283655	1011.650584	996.607047	667.1816991	1041.847095	-0.642927989	2.87E-08	7.84E-07	EXOC4	4	96940092	97744748	+	2928	protein_coding	exocyst complex component 4 [Source:VGNC Symbol;Acc:VGNC:28648]	-
ENSBTAG00000005704	340.5144338	338.8781771	366.3856843	583.2803958	587.9332049	559.6182149	348.5927651	576.9439385	-0.726681442	2.88E-08	7.86E-07	IL1RL2	11	7031920	7057285	+	1804	protein_coding	Bos taurus interleukin 1 receptor like 2 (IL1RL2), mRNA. [Source:RefSeq mRNA;Acc:NM_001192554]	TIR
ENSBTAG00000001626	740.42092	710.7444953	792.053933	328.8494645	305.1170598	484.6780366	747.7397827	372.8815203	1.003267743	2.90E-08	7.89E-07	CTPS1	3	105201098	105280146	-	2957	protein_coding	Bos taurus CTP synthase 1 (CTPS1), mRNA. [Source:RefSeq mRNA;Acc:NM_001077858]	CTP_synth_N
ENSBTAG00000011563	360.3117846	364.8688337	401.3721157	672.7837669	572.7280358	728.963553	375.517578	658.1584519	-0.809655827	2.95E-08	8.03E-07	TNFSF13B	12	83641466	83672595	+	3019	protein_coding	Bos taurus TNF superfamily member 13b (TNFSF13B), mRNA. [Source:RefSeq mRNA;Acc:NM_001114506]	-
ENSBTAG00000011186	65.33125765	68.97520418	76.77578001	23.13008466	11.15045733	9.732490694	70.36074728	14.6710109	2.263962112	3.01E-08	8.17E-07	BEST1	29	40467592	40477419	+	3743	protein_coding	Bos taurus bestrophin 1 (BEST1), mRNA. [Source:RefSeq mRNA;Acc:NM_001080245]	-
ENSBTAG00000005729	280.1325138	329.8814113	312.9341919	493.7770247	548.3997652	564.4844602	307.6493724	535.5537501	-0.799881067	3.13E-08	8.47E-07	FBXL4	9	50809427	50885025	+	2593	protein_coding	Bos taurus F-box and leucine rich repeat protein 4 (FBXL4), mRNA. [Source:RefSeq mRNA;Acc:NM_001076059]	F-box
ENSBTAG00000005456	863.164495	933.664358	986.4229963	561.155967	576.7827476	420.443598	927.7506164	519.4607708	0.837142859	3.27E-08	8.83E-07	TTK	9	19702310	19748999	+	3383	protein_coding	TTK protein kinase [Source:VGNC Symbol;Acc:VGNC:36487]	Pkinase
novel.849	204.9025808	207.9252532	225.4681134	104.5882089	104.4088278	74.94017834	212.7653158	94.64573833	1.169847426	3.41E-08	9.20E-07	-	2	104517986	104542147	-	4237	-	-	-
ENSBTAG00000018994	84.13874091	65.97628226	99.12822229	222.2499439	181.4483512	190.7568176	83.08108182	198.1517042	-1.253191974	3.45E-08	9.30E-07	TNFSF10	1	94985031	95001222	+	1184	protein_coding	TNF superfamily member 10 [Source:VGNC Symbol;Acc:VGNC:36172]	-
ENSBTAG00000015649	264.2946332	320.8846455	350.8361593	590.3199868	511.9073594	676.4081032	312.005146	592.8784831	-0.926257095	3.53E-08	9.50E-07	TMEM156	6	58180729	58223872	-	1547	protein_coding	Bos taurus transmembrane protein 156 (TMEM156), mRNA. [Source:RefSeq mRNA;Acc:NM_001083469]	-
ENSBTAG00000005433	190.0545677	188.932081	167.1573944	308.7363474	430.8131243	356.2091594	182.0480144	365.252877	-1.004639151	3.54E-08	9.51E-07	SSUH2	22	17852252	17874641	+	2581	protein_coding	ssu-2 homolog (C. elegans) [Source:NCBI gene;Acc:787021]	-
ENSBTAG00000019386	657.2720466	651.7656975	619.0654666	994.5936404	1036.992532	952.8108389	642.7010702	994.7990038	-0.630228953	3.68E-08	9.87E-07	BOLA-NC1	23	28548781	28553089	-	2324	protein_coding	Bos taurus non-classical MHC class I antigen (BOLA-NC1), mRNA. [Source:RefSeq mRNA;Acc:NM_001105616]	MHC_I
ENSBTAG00000017133	91.06781369	114.9586736	73.86024406	31.1753315	12.16413527	23.35797767	93.29557713	22.23248148	2.06781719	3.71E-08	9.94E-07	GINS4	27	36454819	36470324	+	2808	protein_coding	Bos taurus GINS complex subunit 4 (GINS4), mRNA. [Source:RefSeq mRNA;Acc:NM_001082460]	-
ENSBTAG00000015109	878.0125081	874.6855603	858.1394145	1279.194247	1415.094403	1275.92953	870.2791609	1323.40606	-0.604651128	3.86E-08	1.03E-06	TOB2	5	112539939	112549987	-	4344	protein_coding	Bos taurus transducer of ERBB2, 2 (TOB2), mRNA. [Source:RefSeq mRNA;Acc:NM_001083387]	-
ENSBTAG00000018040	161.348409	166.9399869	126.3398912	302.7024123	306.1307377	523.6079993	151.5427624	377.4803831	-1.317423391	3.88E-08	1.03E-06	PSMB10	18	35417757	35421332	-	1207	protein_coding	Bos taurus proteasome subunit beta 10 (PSMB10), mRNA. [Source:RefSeq mRNA;Acc:NM_001034040]	Proteasome
ENSBTAG00000000177	8245.596609	8239.038157	7973.018977	12051.77976	12448.97877	16948.15929	8152.551248	13816.30594	-0.761071206	3.89E-08	1.04E-06	MSLN	25	650311	653932	+	1553	protein_coding	Bos taurus mesothelin (MSLN), mRNA. [Source:RefSeq mRNA;Acc:NM_001100374]	-
ENSBTAG00000016726	347.4435066	317.8857236	266.2856167	141.7974755	173.3389276	139.1746169	310.5382823	151.4370067	1.03631167	3.97E-08	1.06E-06	KIF15	22	16507963	16564652	+	4757	protein_coding	Bos taurus kinesin family member 15 (KIF15), mRNA. [Source:RefSeq mRNA;Acc:NM_001192832]	Kinesin
ENSBTAG00000010613	852.275952	843.6967004	912.5627522	588.308675	496.7021903	449.6410701	869.5118016	511.5506451	0.765617483	4.05E-08	1.07E-06	NUP188	11	99445824	99489060	+	5727	protein_coding	Bos taurus nucleoporin 188 (NUP188), mRNA. [Source:RefSeq mRNA;Acc:NM_001101838]	-
novel.1759	175.2065546	177.936034	178.8195382	325.832497	337.5547538	310.4664531	177.3207089	324.6179013	-0.872213456	4.09E-08	1.08E-06	-	9	102052344	102081199	-	5891	-	-	-
ENSBTAG00000011190	12814.82517	13125.28161	12202.48979	7964.79437	8359.801967	5679.881569	12714.19886	7334.825969	0.793639722	4.13E-08	1.09E-06	FLNA	X	37397604	37422791	-	8924	protein_coding	Bos taurus filamin A (FLNA), mRNA. [Source:RefSeq mRNA;Acc:NM_001206514]	CH
ENSBTAG00000037465	349.4232417	382.8623652	464.5420613	660.7158966	696.3967444	779.5725046	398.9425561	712.2283819	-0.836059971	4.29E-08	1.13E-06	TRIM34	15	47890408	47904741	-	2450	protein_coding	Bos taurus tripartite motif containing 34 (TRIM34), mRNA. [Source:RefSeq mRNA;Acc:NM_001046461]	SPRY
ENSBTAG00000032347	174.2166871	168.9392682	157.4389413	77.43550082	65.88906606	39.90321184	166.8649655	61.07592624	1.451615964	4.31E-08	1.14E-06	-	22	47588803	47589179	+	375	pseudogene	-	-
novel.444	152.4396012	168.9392682	150.6360241	306.7250357	337.5547538	273.4829885	157.3382978	305.920926	-0.959155826	4.43E-08	1.17E-06	-	14	1409839	1417190	-	6701	-	PF18697:Murine leukemia virus (MLV) integrase (IN) C-terminal domain	-
ENSBTAG00000012900	2076.742099	1954.297452	1723.081746	1262.098098	1191.071579	963.5165787	1918.040432	1138.895418	0.752124076	4.54E-08	1.19E-06	TMEM229B	10	79345988	79359617	-	4040	protein_coding	Bos taurus transmembrane protein 229B (TMEM229B), mRNA. [Source:RefSeq mRNA;Acc:NM_001031768]	-
ENSBTAG00000018252	2086.640775	1912.312545	2099.185884	1238.968013	1214.386171	1453.060861	2032.713068	1302.138348	0.642394648	4.62E-08	1.21E-06	ARRDC4	21	8734781	8749130	-	4125	protein_coding	arrestin domain containing 4 [Source:VGNC Symbol;Acc:VGNC:26174]	-
ENSBTAG00000048485	1805.518393	1857.33231	1102.072589	844.750918	798.7782163	636.5048914	1588.307764	760.0113419	1.063446789	4.69E-08	1.23E-06	TUBB2A	23	50525012	50528874	+	1674	protein_coding	tubulin beta 2A class IIa [Source:NCBI gene;Acc:100295973]	Tubulin
ENSBTAG00000016640	1057.178533	1057.619797	1091.38229	732.1174623	696.3967444	637.4781404	1068.726874	688.6641157	0.634218992	4.71E-08	1.23E-06	HEATR3	18	18480139	18519650	+	2880	protein_coding	Bos taurus HEAT repeat containing 3 (HEATR3), mRNA. [Source:RefSeq mRNA;Acc:NM_001078021]	-
ENSBTAG00000001589	2808.254211	2774.002777	3287.752706	4339.405013	4409.499037	4621.95983	2956.669898	4456.954627	-0.592051649	4.82E-08	1.26E-06	TM9SF2	12	76343402	76394962	+	2758	protein_coding	Bos taurus transmembrane 9 superfamily member 2 (TM9SF2), mRNA. [Source:RefSeq mRNA;Acc:NM_001205323]	-
ENSBTAG00000004796	176.1964221	177.936034	157.4389413	64.36197471	69.94377782	84.67266904	170.5237991	72.99280719	1.223079722	4.90E-08	1.28E-06	GRP	24	58203516	58216348	+	1090	protein_coding	gastrin releasing peptide [Source:VGNC Symbol;Acc:VGNC:29664]	Bombesin
ENSBTAG00000052956	593.9205241	715.7426985	671.5451137	1119.294966	994.4180586	1330.431478	660.4027787	1148.048168	-0.797961463	4.90E-08	1.28E-06	-	15	6304446	6304628	+	183	protein_coding	-	-
ENSBTAG00000034255	1054.20893	1044.624469	1029.18419	717.0326245	645.7128474	677.3813523	1042.67253	680.0422747	0.616556146	5.01E-08	1.30E-06	EIF5B	11	4479846	4531610	+	3677	protein_coding	eukaryotic translation initiation factor 5B [Source:VGNC Symbol;Acc:VGNC:28420]	GTP_EFTU
ENSBTAG00000047319	609.7584047	605.782228	630.7276104	952.3560945	912.3101455	1085.172712	615.4227477	983.2796508	-0.676161274	5.02E-08	1.30E-06	-	21	67884902	67885504	-	603	protein_coding	-	Ras
ENSBTAG00000018103	1135.378068	1187.573081	1055.424014	681.8346695	594.0152725	764.0005195	1126.125054	679.9501538	0.727539365	5.13E-08	1.33E-06	HMGB1	12	30327227	30333011	+	1862	protein_coding	high mobility group box 1 [Source:VGNC Symbol;Acc:VGNC:53816]	HMG_box
ENSBTAG00000022004	7946.656612	7816.190167	7356.869046	4721.554238	5064.334986	3338.244308	7706.571942	4374.711177	0.816958013	5.23E-08	1.35E-06	FLNB	22	43132187	43272493	-	10208	protein_coding	Bos taurus filamin B (FLNB), mRNA. [Source:RefSeq mRNA;Acc:NM_001191460]	CH
ENSBTAG00000007002	480.0857569	442.8408037	455.7954535	771.3380406	759.2447767	689.0603411	459.5740047	739.8810528	-0.686834993	5.31E-08	1.37E-06	IDUA	6	117374270	117388382	-	2228	protein_coding	iduronidase, alpha-L- [Source:VGNC Symbol;Acc:VGNC:30037]	Glyco_hydro_39
ENSBTAG00000025434	921.5666798	867.6880758	848.4209614	556.1276877	530.1535623	589.788936	879.225239	558.690062	0.653979748	5.35E-08	1.38E-06	ZFP36L1	10	80614620	80620778	-	3684	protein_coding	ZFP36 ring finger protein like 1 [Source:VGNC Symbol;Acc:VGNC:37163]	zf-CCCH
ENSBTAG00000032140	235.5884745	178.9356746	188.5379914	78.44115667	92.24469249	43.79620812	201.0207135	71.4940191	1.49315537	5.35E-08	1.38E-06	SBK1	25	25816381	25820460	+	1257	protein_coding	SH3 domain binding kinase 1 [Source:NCBI gene;Acc:614815]	Pkinase
ENSBTAG00000021395	1484.80131	1463.473897	1468.458273	2385.415688	2381.12948	3864.772054	1472.244494	2877.105741	-0.966693408	5.38E-08	1.38E-06	PSME1	10	20998111	21026409	-	1130	protein_coding	proteasome activator subunit 1 [Source:VGNC Symbol;Acc:VGNC:33473]	-
ENSBTAG00000006429	2110.397595	2054.261516	2014.635341	2799.7459	3193.085509	3092.012293	2059.764818	3028.281234	-0.556036185	5.43E-08	1.39E-06	ACO2	5	112568047	112617811	+	3486	protein_coding	aconitase 2 [Source:VGNC Symbol;Acc:VGNC:25546]	Aconitase
ENSBTAG00000008088	258.355428	235.9151911	173.9603117	112.6334557	70.95745576	78.83317462	222.7436436	87.47469537	1.348403279	5.48E-08	1.40E-06	KIF18B	19	44629534	44650895	-	3054	protein_coding	Bos taurus kinesin family member 18B (KIF18B), mRNA. [Source:RefSeq mRNA;Acc:NM_001192283]	Kinesin
ENSBTAG00000006507	197.973508	220.9205815	184.6506101	83.46943595	104.4088278	86.61916717	201.1815666	91.49914363	1.13689873	5.53E-08	1.41E-06	ADAMTS3	6	87427184	87706738	-	4996	protein_coding	ADAM metallopeptidase with thrombospondin type 1 motif 3 [Source:VGNC Symbol;Acc:VGNC:25626]	TSP_1
ENSBTAG00000003165	88.09821107	75.97268866	83.57869722	235.32347	186.5167409	162.5325946	82.54986565	194.7909352	-1.238080155	5.54E-08	1.41E-06	ADAMTS9	22	36760610	36922968	+	6719	protein_coding	Bos taurus ADAM metallopeptidase with thrombospondin type 1 motif 9 (ADAMTS9), mRNA. [Source:RefSeq mRNA;Acc:NM_001206573]	TSP_1
ENSBTAG00000049619	262.3148981	259.9065665	219.6370415	106.5995206	88.18998073	35.0369665	247.2861687	76.60882261	1.692114205	5.62E-08	1.43E-06	GFOD1	23	43100584	43197380	+	2796	protein_coding	glucose-fructose oxidoreductase domain containing 1 [Source:NCBI gene;Acc:104968712]	GFO_IDH_MocA
ENSBTAG00000013489	283.1021165	375.8648808	331.3992529	585.2917075	571.7143579	827.261709	330.1220834	661.4225914	-1.00292737	5.68E-08	1.45E-06	CYP27A1	2	106739389	106782307	+	2436	protein_coding	cytochrome P450 family 27 subfamily A member 1 [Source:HGNC Symbol;Acc:HGNC:2605]	p450
ENSBTAG00000010273	384.0686056	421.8483502	422.7527127	178.0010863	229.0912143	242.3390183	409.5565562	216.4771063	0.919516716	5.69E-08	1.45E-06	EREG	6	89306902	89325899	+	2193	protein_coding	epiregulin [Source:VGNC Symbol;Acc:VGNC:28575]	-
ENSBTAG00000000428	449.3998632	453.8368507	427.6119393	261.4705222	224.0228246	154.746602	443.6162177	213.4133163	1.056361756	5.86E-08	1.48E-06	BAK1	23	7712944	7719279	-	2082	protein_coding	BCL2 antagonist/killer 1 [Source:VGNC Symbol;Acc:VGNC:26416]	-
ENSBTAG00000019966	395.947016	432.8443972	447.0488456	229.2895349	232.1322481	143.0676132	425.2800863	201.4964654	1.078540524	5.99E-08	1.52E-06	TICAM1	7	19335555	19337855	+	2280	pseudogene	toll like receptor adaptor molecule 1 [Source:VGNC Symbol;Acc:VGNC:52887]	-
ENSBTAG00000021151	2797.365668	2818.986606	2286.75203	1595.975842	1694.869515	1216.561337	2634.368101	1502.468898	0.81022827	6.08E-08	1.54E-06	MYH10	19	28063029	28183409	-	7111	protein_coding	myosin heavy chain 10 [Source:VGNC Symbol;Acc:VGNC:31794]	Myosin_tail_1
ENSBTAG00000012351	501.8628428	535.8073832	530.6275428	918.1637954	1008.60955	756.2145269	522.765923	894.3292907	-0.774413224	6.10E-08	1.54E-06	ARNT2	21	26266857	26459510	+	6142	protein_coding	Bos taurus aryl-hydrocarbon receptor nuclear translocator 2 (ARNT2), mRNA. [Source:RefSeq mRNA;Acc:NM_001206705]	HLH
ENSBTAG00000027728	782.9852242	900.6762169	1067.086158	1496.415912	1476.928758	1662.30941	916.9158662	1545.218027	-0.752897138	6.20E-08	1.56E-06	NUDT12	7	102607083	102621109	-	3447	protein_coding	Bos taurus nudix hydrolase 12 (NUDT12), mRNA. [Source:RefSeq mRNA;Acc:NM_001046608]	NUDIX
novel.1764	356.3523144	383.8620059	383.8789	223.2555998	207.8039776	203.4090555	374.6977401	211.4895443	0.825298546	6.28E-08	1.58E-06	-	NKLS02000056.1	1597	3128	-	1392	-	-	-
ENSBTAG00000021499	61244.09457	61461.90513	63537.30311	90257.61297	90666.39594	120041.5135	62081.10094	100321.8408	-0.692412357	6.32E-08	1.59E-06	PSAP	28	27964205	27997628	-	2679	protein_coding	prosaposin [Source:VGNC Symbol;Acc:VGNC:33431]	-
ENSBTAG00000001068	697.8566158	602.7833061	564.6421289	353.9908609	359.8556685	380.5403861	621.7606836	364.7956385	0.769064191	6.38E-08	1.60E-06	ZCWPW1	25	36114316	36138223	+	3045	protein_coding	zinc finger CW-type and PWWP domain containing 1 [Source:VGNC Symbol;Acc:VGNC:37125]	PWWP
ENSBTAG00000002128	336.5549636	371.8663182	325.568181	554.116376	560.5639005	641.3711367	344.6631543	585.3504711	-0.764483316	6.38E-08	1.60E-06	MPPE1	24	42723600	42737607	-	2584	protein_coding	Bos taurus metallophosphoesterase 1 (MPPE1), mRNA. [Source:RefSeq mRNA;Acc:NM_001305022]	Metallophos
ENSBTAG00000048906	549.3764847	552.8012741	490.7818849	829.6660802	820.065453	865.2184227	530.9865479	838.316652	-0.659032119	6.51E-08	1.63E-06	-	21	69358193	69380359	-	18027	protein_coding	AHNAK nucleoprotein 2 [Source:NCBI gene;Acc:527701]	-
ENSBTAG00000020357	795.8535022	869.6873571	882.4355474	1242.990637	1292.439373	1464.739849	849.3254689	1333.389953	-0.650805453	6.68E-08	1.67E-06	GOLPH3L	3	20036707	20083521	+	1910	protein_coding	golgi phosphoprotein 3 like [Source:VGNC Symbol;Acc:VGNC:29493]	-
ENSBTAG00000018643	1191.800518	1084.610095	1159.411463	661.7215524	713.6292694	794.1712406	1145.274025	723.1740208	0.66311049	6.68E-08	1.67E-06	PRC1	21	21676334	21699409	+	2984	protein_coding	Bos taurus protein regulator of cytokinesis 1 (PRC1), mRNA. [Source:RefSeq mRNA;Acc:NM_001076543]	-
ENSBTAG00000021771	4879.057105	5065.179124	5339.318169	7583.650801	7138.32005	9100.852048	5094.518133	7940.940966	-0.640389002	6.79E-08	1.69E-06	PTTG1IP	1	144713171	144730575	-	2624	protein_coding	Bos taurus PTTG1 interacting protein (PTTG1IP), mRNA. [Source:RefSeq mRNA;Acc:NM_001046594]	-
ENSBTAG00000005586	494.93377	515.8145704	606.4314775	936.2656008	813.9833854	970.3293222	539.0599393	906.8594361	-0.750387163	6.81E-08	1.69E-06	GATM	10	65098687	65114697	+	2311	protein_coding	Bos taurus glycine amidinotransferase (GATM), mRNA. [Source:RefSeq mRNA;Acc:NM_001045878]	-
ENSBTAG00000006052	365.2611223	371.8663182	333.3429436	584.2860516	642.6718136	559.6182149	356.8234614	595.52536	-0.738944572	7.03E-08	1.75E-06	PLCD3	19	44781286	44802191	-	2983	protein_coding	Bos taurus phospholipase C delta 3 (PLCD3), mRNA. [Source:RefSeq mRNA;Acc:NM_001193028]	PI-PLC-X
ENSBTAG00000001938	754.2790655	700.7480889	675.432495	456.5677581	349.7188891	430.1760887	710.1532165	412.1542453	0.784717419	7.28E-08	1.80E-06	CKS2	8	88791395	88796446	-	781	protein_coding	CDC28 protein kinase regulatory subunit 2 [Source:VGNC Symbol;Acc:VGNC:27388]	-
novel.1379	50.48324454	48.98239137	47.62042051	139.7861638	105.4225057	144.0408623	49.02868548	129.7498439	-1.404563412	7.55E-08	1.87E-06	-	4	69567290	69578824	-	6053	-	PF00078:Reverse transcriptase (RNA-dependent DNA polymerase)	RVT_1
ENSBTAG00000051782	399.9064862	375.8648808	403.3158064	198.1142034	195.6398423	100.2446541	393.0290578	164.6662333	1.256131005	7.57E-08	1.87E-06	ATAD2	14	16454611	16479839	+	1338	protein_coding	Bos taurus ATPase family, AAA domain containing 2 (ATAD2), mRNA. [Source:RefSeq mRNA;Acc:NM_001099020]	-
ENSBTAG00000038186	614.7077424	542.8048677	604.4877869	977.4974909	944.7478396	1441.381872	587.3334657	1121.209067	-0.932968378	7.68E-08	1.89E-06	GLRX	7	95122128	95132776	-	1642	protein_coding	Bos taurus glutaredoxin (GLRX), mRNA. [Source:RefSeq mRNA;Acc:NM_001037604]	-
ENSBTAG00000021505	224.6999316	262.9054884	203.1156712	113.6391116	99.34043807	60.3414423	230.2403637	91.10699732	1.338614507	7.98E-08	1.97E-06	USP36	19	53522615	53553993	+	5095	protein_coding	ubiquitin specific peptidase 36 [Source:VGNC Symbol;Acc:VGNC:52844]	UCH
ENSBTAG00000012925	533.5386041	479.8275073	483.0071223	289.6288862	247.3374172	312.4129513	498.7910779	283.1264182	0.816551939	8.06E-08	1.98E-06	NCAPH	11	2433855	2467290	+	2637	protein_coding	Bos taurus non-SMC condensin I complex subunit H (NCAPH), mRNA. [Source:RefSeq mRNA;Acc:NM_001034213]	-
ENSBTAG00000013413	195.9937729	199.9281281	212.8341243	354.9965167	345.6641774	446.7213228	202.9186751	382.4606723	-0.914694467	8.09E-08	1.98E-06	CCDC51	22	51422933	51433253	+	2738	protein_coding	coiled-coil domain containing 51 [Source:VGNC Symbol;Acc:VGNC:26899]	-
ENSBTAG00000011446	312.7981427	358.8709899	339.1740155	178.0010863	187.5304188	122.6293827	336.947716	162.7202959	1.051034143	8.23E-08	2.02E-06	SEMA7A	21	34234871	34258160	+	2748	protein_coding	Bos taurus semaphorin 7A (SEMA7A), mRNA. [Source:RefSeq mRNA;Acc:NM_001206185]	Sema
ENSBTAG00000008737	3268.542617	3054.901797	3686.209286	5234.438724	4706.506673	5251.651978	3336.551233	5064.199125	-0.601952286	8.28E-08	2.02E-06	DR1	3	50084785	50106905	-	4217	protein_coding	Bos taurus down-regulator of transcription 1 (DR1), mRNA. [Source:RefSeq mRNA;Acc:NM_001046519]	-
ENSBTAG00000019866	1501.629058	1476.469226	1564.67096	2168.194023	2129.737351	2239.446109	1514.256415	2179.125827	-0.525136734	8.31E-08	2.03E-06	NRP1	13	19635324	19782189	+	5672	protein_coding	Bos taurus neuropilin 1 (NRP1), mRNA. [Source:RefSeq mRNA;Acc:NM_001205660]	CUB
ENSBTAG00000007330	1681.784951	1737.375433	2010.74796	2703.202938	2677.123438	3117.316769	1809.969448	2832.547715	-0.646135383	8.33E-08	2.03E-06	STXBP3	3	34568247	34622399	-	2645	protein_coding	Bos taurus syntaxin binding protein 3 (STXBP3), mRNA. [Source:RefSeq mRNA;Acc:NM_001083415]	Sec1
ENSBTAG00000003034	830.4988661	859.6909507	722.0810702	530.9862913	468.319208	452.5608173	804.0902957	483.9554389	0.732500285	8.40E-08	2.05E-06	GATAD2A	7	3816749	3913344	-	4184	protein_coding	GATA zinc finger domain containing 2A [Source:VGNC Symbol;Acc:VGNC:29271]	GATA
ENSBTAG00000020108	349.4232417	328.8817707	261.4263902	148.8370665	167.25686	158.6395983	313.2438008	158.2445083	0.984940015	8.48E-08	2.06E-06	LETM1	6	116734630	116760816	+	2729	protein_coding	Bos taurus leucine zipper and EF-hand containing transmembrane protein 1 (LETM1), mRNA. [Source:RefSeq mRNA;Acc:NM_001075614]	-
ENSBTAG00000012142	597.8799942	584.7897746	655.9955887	384.1605365	385.197617	349.3964159	612.8884525	372.9181898	0.717095408	8.68E-08	2.11E-06	RAD18	22	17583266	17694050	+	2441	protein_coding	Bos taurus RAD18, E3 ubiquitin protein ligase (RAD18), mRNA. [Source:RefSeq mRNA;Acc:NM_001035295]	SAP
ENSBTAG00000001082	102.9462242	133.9518458	87.46607849	33.18664321	41.56079552	28.22422301	108.1213828	34.32388725	1.656257642	8.70E-08	2.11E-06	SH2D5	2	131902269	131915138	+	2648	protein_coding	SH2 domain containing 5 [Source:VGNC Symbol;Acc:VGNC:50133]	-
ENSBTAG00000030340	442.4707904	415.8505064	325.568181	201.131171	214.8997232	142.0943641	394.6298259	186.0417528	1.085455872	8.84E-08	2.14E-06	IFFO2	2	133705999	133751262	+	1560	protein_coding	intermediate filament family orphan 2 [Source:NCBI gene;Acc:788579]	Filament
ENSBTAG00000005475	140.5611907	135.9511271	161.3263225	268.5101132	277.7477554	290.0282227	145.9462134	278.7620304	-0.933351274	8.93E-08	2.16E-06	TCAF2	4	106966075	107001714	-	3792	protein_coding	Bos taurus TRPM8 channel associated factor 2 (TCAF2), mRNA. [Source:RefSeq mRNA;Acc:NM_001101924]	-
ENSBTAG00000020745	381.0990029	356.8717086	280.8632965	150.8483782	147.9969792	63.26118951	339.611336	120.7021823	1.493504741	9.09E-08	2.19E-06	HIVEP3	3	104538208	104671493	+	9292	protein_coding	human immunodeficiency virus type I enhancer binding protein 3 [Source:NCBI gene;Acc:509866]	-
ENSBTAG00000050061	383.078738	321.8842862	238.1021026	148.8370665	151.038013	132.3618734	314.3550422	144.0789843	1.125598876	9.22E-08	2.22E-06	INCENP	29	40599706	40634288	+	2637	protein_coding	inner centromere protein [Source:HGNC Symbol;Acc:HGNC:6058]	-
ENSBTAG00000021853	531.558869	545.8037896	515.0780178	801.5077163	804.8602839	873.0044152	530.8135588	826.4574718	-0.638922722	9.57E-08	2.30E-06	IP6K2	22	51175603	51199445	+	1839	protein_coding	Bos taurus inositol hexakisphosphate kinase 2 (IP6K2), mRNA. [Source:RefSeq mRNA;Acc:NM_001034317]	-
ENSBTAG00000017942	895.8301238	880.6834041	701.6723186	460.5903815	522.0441388	384.4333824	826.0619488	455.6893009	0.858434918	9.95E-08	2.39E-06	CRTC2	3	16477455	16487230	+	2826	protein_coding	Bos taurus CREB regulated transcription coactivator 2 (CRTC2), mRNA. [Source:RefSeq mRNA;Acc:NM_001076250]	-
ENSBTAG00000000109	202.9228457	208.9248938	180.7632289	82.46378009	106.4361836	81.75292183	197.5369895	90.21762852	1.131139574	1.08E-07	2.59E-06	NPTXR	5	110424099	110445709	-	5501	protein_coding	neuronal pentraxin receptor [Source:VGNC Symbol;Acc:VGNC:32220]	-
ENSBTAG00000021779	694.8870131	669.759229	740.5461312	1033.814219	1145.456072	1438.462125	701.7307911	1205.910805	-0.781244817	1.10E-07	2.63E-06	MGST2	17	18024427	18062255	-	1891	protein_coding	Bos taurus microsomal glutathione S-transferase 2 (MGST2), mRNA. [Source:RefSeq mRNA;Acc:NM_001076382]	-
ENSBTAG00000009924	399.9064862	410.8523032	419.8371768	679.8233578	709.5745576	608.2806684	410.1986554	665.8928613	-0.698730168	1.11E-07	2.64E-06	MR1	16	62161304	62187092	+	1406	protein_coding	Bos taurus major histocompatibility complex, class I-related (MR1), mRNA. [Source:RefSeq mRNA;Acc:NM_001190298]	MHC_I
ENSBTAG00000008024	423.6633072	399.8562561	394.5691985	233.3121583	200.708232	250.1250108	406.0295873	228.0484671	0.831755665	1.13E-07	2.69E-06	UCHL3	12	50598782	50648820	+	2069	protein_coding	ubiquitin C-terminal hydrolase L3 [Source:VGNC Symbol;Acc:VGNC:36632]	-
ENSBTAG00000017514	578.0826434	555.800196	556.8673664	348.9625816	319.3085509	228.7135313	563.5834019	298.9948879	0.915094681	1.19E-07	2.83E-06	CCND1	29	46888863	46898541	+	1405	protein_coding	cyclin D1 [Source:VGNC Symbol;Acc:VGNC:26962]	Cyclin_C
ENSBTAG00000009596	575.1130408	575.7930088	559.7829023	884.9771522	828.1748765	934.3191066	570.2296506	882.4903785	-0.63020331	1.23E-07	2.92E-06	C8H9orf43	8	102659520	102676450	+	1669	protein_coding	Bos taurus chromosome 8 C9orf43 homolog (C8H9orf43), mRNA. [Source:RefSeq mRNA;Acc:NM_001076305]	-
novel.1500	64.34139011	72.97376674	68.02917216	19.10746124	21.28723673	12.6522379	68.44810967	17.68231196	1.955119539	1.26E-07	2.99E-06	-	6	6737891	6750800	+	1266	-	-	-
ENSBTAG00000009051	1030.452109	931.6650768	785.2510158	1417.974755	1468.819334	1556.225262	915.7894006	1481.00645	-0.693649791	1.27E-07	3.00E-06	MMP19	5	57426768	57433048	+	3272	protein_coding	Bos taurus matrix metallopeptidase 19 (MMP19), mRNA. [Source:RefSeq mRNA;Acc:NM_001075983]	Hemopexin
ENSBTAG00000010994	832.4786012	794.714309	764.8422641	1210.809649	1141.40136	1252.571552	797.3450581	1201.594187	-0.591800092	1.27E-07	3.01E-06	CTSF	29	44596854	44602466	-	1961	protein_coding	Bos taurus cathepsin F (CTSF), mRNA. [Source:RefSeq mRNA;Acc:NM_001075416]	Peptidase_C1
ENSBTAG00000007595	2216.313422	2259.187847	2531.65705	3678.689117	3376.561216	3310.020085	2335.71944	3455.090139	-0.564790937	1.29E-07	3.04E-06	BROX	16	26208022	26226551	+	3556	protein_coding	Bos taurus BRO1 domain and CAAX motif containing (BROX), mRNA. [Source:RefSeq mRNA;Acc:NM_001205894]	-
ENSBTAG00000019093	184.1153625	159.9425024	200.2001352	307.7306916	345.6641774	427.2563415	181.4193334	360.2170701	-0.989592037	1.29E-07	3.05E-06	AMY2B	3	39784076	39858496	-	1978	protein_coding	Bos taurus amylase, alpha 2B (pancreatic) (AMY2B), mRNA. [Source:RefSeq mRNA;Acc:NM_001035016]	-
ENSBTAG00000017670	247.466885	210.9241751	292.5254403	445.5055437	436.8951919	539.1799844	250.3055001	473.86024	-0.920632925	1.30E-07	3.07E-06	-	3	54901260	54983375	+	1990	protein_coding	guanylate-binding protein 1 [Source:NCBI gene;Acc:511531]	-
ENSBTAG00000023074	524.6297962	608.7811499	631.6994558	372.0926663	341.6094656	291.0014717	588.370134	334.9012012	0.813394308	1.33E-07	3.13E-06	C28H1orf198	28	3562180	3594285	-	1096	protein_coding	Bos taurus chromosome 28 C1orf198 homolog (C28H1orf198), mRNA. [Source:RefSeq mRNA;Acc:NM_001040592]	-
ENSBTAG00000002275	4475.191149	4378.426005	4928.2276	3138.651923	3097.799783	3326.565319	4593.948251	3187.672342	0.527223005	1.34E-07	3.15E-06	PTP4A1	9	448438	458072	+	2624	protein_coding	Bos taurus protein tyrosine phosphatase type IVA, member 1 (PTP4A1), transcript variant 1, mRNA. [Source:RefSeq mRNA;Acc:NM_001354592]	DSPc
novel.153	424.6531747	368.8673963	523.8246256	871.9036261	937.652094	682.2475976	439.1150655	830.6011059	-0.919125912	1.35E-07	3.17E-06	-	10	51972660	52040606	-	10763	-	-	-
ENSBTAG00000015730	167.2876143	192.9306436	189.5098367	299.6854447	352.7599229	410.7111073	183.2426982	354.3854916	-0.951870267	1.36E-07	3.20E-06	HLA-DMA	23	7263678	7269167	-	1281	protein_coding	major histocompatibility complex, class II, DM alpha [Source:NCBI gene;Acc:282490]	C1-set
ENSBTAG00000011640	203.9127133	190.9313623	226.4399588	366.0587311	368.97877	363.0219029	207.0946781	366.0198013	-0.821298348	1.38E-07	3.24E-06	PLPP3	3	89608083	89696904	+	2753	protein_coding	phospholipid phosphatase 3 [Source:VGNC Symbol;Acc:VGNC:33046]	-
ENSBTAG00000007362	1680.795083	1643.409213	1351.836835	977.4974909	1030.910464	946.9713445	1558.680377	985.1264333	0.661932338	1.39E-07	3.24E-06	XPC	22	58040295	58063254	+	3465	protein_coding	Bos taurus XPC complex subunit, DNA damage recognition and repair factor (XPC), mRNA. [Source:RefSeq mRNA;Acc:NM_001205908]	-
ENSBTAG00000001543	106.9056943	90.96729827	123.4243552	43.24320176	27.36930437	14.59873604	107.0991159	28.40374739	1.917453116	1.39E-07	3.25E-06	BRI3BP	17	50813518	50834720	-	975	protein_coding	Bos taurus BRI3 binding protein (BRI3BP), mRNA. [Source:RefSeq mRNA;Acc:NM_001099087]	-
ENSBTAG00000021224	442.4707904	462.8336165	428.5837846	269.5157691	263.5562643	202.4358064	444.6293972	245.1692799	0.85937391	1.40E-07	3.26E-06	ZSWIM6	20	17842584	18052859	-	3628	protein_coding	zinc finger SWIM-type containing 6 [Source:VGNC Symbol;Acc:VGNC:37386]	-
ENSBTAG00000004064	239.5479447	230.9169879	290.5817497	436.454641	447.0319713	626.7724007	253.6822274	503.419671	-0.988832912	1.42E-07	3.30E-06	BPNT1	16	23556998	23584580	-	2484	protein_coding	3'(2'), 5'-bisphosphate nucleotidase 1 [Source:NCBI gene;Acc:521254]	-
novel.58	62.36165503	60.97807906	54.42333773	179.0067422	117.586641	154.746602	59.25435727	150.4466617	-1.344735719	1.45E-07	3.37E-06	-	1	91418337	91433255	-	4765	-	-	-
ENSBTAG00000016747	318.7373479	403.8548187	291.553595	154.8710016	130.7644542	192.7033157	338.0485872	159.4462572	1.083180672	1.54E-07	3.58E-06	NAT10	15	64702013	64740844	+	3843	protein_coding	Bos taurus N-acetyltransferase 10 (NAT10), mRNA. [Source:RefSeq mRNA;Acc:NM_001098031]	-
ENSBTAG00000012267	2403.398387	2295.17491	2432.528827	3690.756987	3813.456408	3164.032725	2377.034042	3556.08204	-0.581044891	1.56E-07	3.62E-06	ZFC3H1	5	1243675	1293905	-	6709	protein_coding	zinc finger C3H1-type containing [Source:VGNC Symbol;Acc:VGNC:37155]	-
novel.1089	299.9298646	312.8875204	379.0196735	587.3030192	614.2888313	524.5812484	330.6123528	575.391033	-0.798959866	1.57E-07	3.63E-06	-	25	32661824	32665113	+	3290	-	-	-
ENSBTAG00000001920	294.9805269	322.8839268	320.7089545	146.8257548	173.3389276	90.51216345	312.8578027	136.892282	1.19364338	1.59E-07	3.68E-06	POLQ	1	65944699	66053204	-	8266	protein_coding	DNA polymerase theta [Source:VGNC Symbol;Acc:VGNC:33130]	DEAD
ENSBTAG00000014793	335.5650961	321.8842862	392.6255079	207.1651061	178.4073173	182.970825	350.0249634	189.5144162	0.885437527	1.64E-07	3.79E-06	C16H1orf112	16	37442916	37493120	+	3002	protein_coding	chromosome 16 C1orf112 homolog [Source:VGNC Symbol;Acc:VGNC:52639]	-
novel.505	125.7131776	131.9525645	129.2554271	241.3574051	233.1459261	271.5364904	128.9737231	248.6799405	-0.947548685	1.71E-07	3.93E-06	-	15	82769621	82778184	-	4486	-	-	-
ENSBTAG00000000250	262.3148981	314.8868017	268.2293074	462.6016932	513.9347153	473.9722968	281.8103357	483.5029018	-0.778931314	1.71E-07	3.93E-06	HDHD3	8	102631185	102634313	-	1618	protein_coding	Bos taurus haloacid dehalogenase like hydrolase domain containing 3 (HDHD3), mRNA. [Source:RefSeq mRNA;Acc:NM_001014896]	-
ENSBTAG00000000061	1563.990713	1586.429696	1533.57191	998.6162638	1130.250902	912.9076271	1561.330773	1013.924931	0.622999713	1.73E-07	3.99E-06	PCDH7	6	49958089	50426482	+	4178	protein_coding	protocadherin 7 [Source:VGNC Symbol;Acc:VGNC:32621]	Cadherin
ENSBTAG00000018970	1679.805216	1671.399151	1785.279847	1047.893401	1138.360326	757.187776	1712.161404	981.1471676	0.80354025	1.77E-07	4.06E-06	XPO5	23	17071458	17118839	-	3967	protein_coding	exportin 5 [Source:VGNC Symbol;Acc:VGNC:36999]	-
ENSBTAG00000010517	183.1254949	159.9425024	158.4107866	304.713724	333.5000421	289.0549736	167.1595947	309.0895799	-0.886648848	1.86E-07	4.26E-06	EVPL	19	55626318	55644114	+	6054	protein_coding	envoplakin [Source:VGNC Symbol;Acc:VGNC:55823]	-
ENSBTAG00000006410	421.6835721	455.836132	447.0488456	275.5497042	239.2279937	265.6969959	441.5228499	260.1582313	0.762940102	1.87E-07	4.27E-06	DCTN5	25	21293320	21322278	+	1876	protein_coding	Bos taurus dynactin subunit 5 (DCTN5), mRNA. [Source:RefSeq mRNA;Acc:NM_001024484]	-
ENSBTAG00000015683	2159.890972	2223.200784	2432.528827	1547.704361	1489.092893	1618.513202	2271.873528	1551.770152	0.549941755	1.91E-07	4.37E-06	HSPA4	7	44607161	44661126	+	4839	protein_coding	Bos taurus heat shock protein family A (Hsp70) member 4 (HSPA4), mRNA. [Source:RefSeq mRNA;Acc:NM_001114192]	HSP70
ENSBTAG00000002302	524.6297962	533.8081019	617.121776	865.869691	931.5700264	1296.36776	558.5198914	1031.269159	-0.884853969	1.98E-07	4.51E-06	CD59	15	64346582	64368108	-	459	protein_coding	CD59 molecule [Source:VGNC Symbol;Acc:VGNC:54861]	-
ENSBTAG00000002472	184.1153625	215.9223783	219.6370415	418.3528356	342.6231435	367.8881482	206.5582608	376.2880425	-0.865210464	2.07E-07	4.73E-06	CASP9	16	52000725	52023460	+	3330	protein_coding	Bos taurus caspase 9 (CASP9), mRNA. [Source:RefSeq mRNA;Acc:NM_001205504]	Peptidase_C14
ENSBTAG00000021673	757.2486682	843.6967004	819.2656019	514.8957976	543.3313756	496.3570254	806.7369901	518.1947329	0.638739238	2.12E-07	4.82E-06	NDC80	24	36860566	36894144	+	2379	protein_coding	Bos taurus NDC80, kinetochore complex component (NDC80), mRNA. [Source:RefSeq mRNA;Acc:NM_001206583]	-
ENSBTAG00000005898	1465.993827	1428.486475	1486.923334	1009.678478	976.1718557	1035.53701	1460.467879	1007.129115	0.536134918	2.14E-07	4.86E-06	TGS1	14	23070145	23095949	+	3029	protein_coding	Bos taurus trimethylguanosine synthase 1 (TGS1), mRNA. [Source:RefSeq mRNA;Acc:NM_001205698]	-
ENSBTAG00000020116	486.0249622	424.8472721	414.0061049	729.1004947	728.8344385	1127.022422	441.6261131	861.6524518	-0.964569727	2.16E-07	4.90E-06	JSP.1	23	28663713	28667379	-	1550	protein_coding	Bos taurus MHC Class I JSP.1 (JSP.1), mRNA. [Source:RefSeq mRNA;Acc:NM_001040498]	MHC_I
ENSBTAG00000051972	490.9742999	467.8318197	361.5264578	238.3404376	255.4468407	200.4893083	440.1108591	231.4255289	0.92757428	2.23E-07	5.04E-06	CEBPB	13	78205757	78206803	+	1047	protein_coding	Bos taurus CCAAT enhancer binding protein beta (CEBPB), mRNA. [Source:RefSeq mRNA;Acc:NM_176788]	bZIP_2
ENSBTAG00000017564	820.6001907	768.7236524	735.6869046	1100.187505	1212.358816	1208.775344	775.0035826	1173.773888	-0.59896303	2.23E-07	5.04E-06	CGN	3	19252157	19277508	-	5463	protein_coding	Bos taurus cingulin (CGN), mRNA. [Source:RefSeq mRNA;Acc:NM_001192786]	Myosin_tail_1
ENSBTAG00000001570	57.41231733	56.9795165	58.31071899	17.09614953	13.17781321	6.812743486	57.56751761	12.36223541	2.222934593	2.33E-07	5.25E-06	CSF2	7	22398938	22401303	-	767	protein_coding	Bos taurus colony stimulating factor 2 (CSF2), mRNA. [Source:RefSeq mRNA;Acc:NM_174027]	-
ENSBTAG00000010909	523.6399287	526.8106174	567.5576649	347.9569258	333.5000421	313.3862003	539.3360703	331.6143894	0.701951747	2.33E-07	5.26E-06	SLC30A1	16	71867070	71871370	+	2732	protein_coding	solute carrier family 30 member 1 [Source:VGNC Symbol;Acc:VGNC:34805]	-
ENSBTAG00000015077	519.6804585	504.8185234	507.3032552	306.7250357	331.4726862	255.9645052	510.6007457	298.0540757	0.77714175	2.38E-07	5.35E-06	-	2	69496365	69511380	+	2013	protein_coding	-	DEAD
ENSBTAG00000009641	614.7077424	746.7315583	672.5169591	426.3980824	420.6763449	406.818111	677.9854199	417.9641794	0.697889001	2.43E-07	5.46E-06	MTHFD1	10	76546544	76607077	+	3160	protein_coding	Bos taurus methylenetetrahydrofolate dehydrogenase, cyclohydrolase and formyltetrahydrofolate synthetase 1 (MTHFD1), mRNA. [Source:RefSeq mRNA;Acc:NM_001083477]	-
ENSBTAG00000021939	156.3990713	156.9435805	164.2418585	71.40156569	80.08055722	65.20768765	159.1948368	72.22993685	1.140881388	2.46E-07	5.52E-06	ELAC2	19	31362746	31378583	-	2334	protein_coding	elaC ribonuclease Z 2 [Source:VGNC Symbol;Acc:VGNC:28422]	-
ENSBTAG00000002029	603.8191995	582.7904933	708.4752358	954.3674062	997.4590924	1184.444117	631.6949762	1045.423539	-0.726787773	2.51E-07	5.62E-06	IGSF5	1	139827395	139881435	+	3572	protein_coding	Bos taurus immunoglobulin superfamily member 5 (IGSF5), transcript variant 1, mRNA. [Source:RefSeq mRNA;Acc:NM_001206778]	I-set
ENSBTAG00000020214	138.5814556	163.941065	170.0729304	80.45246838	58.79332049	61.31469137	157.531817	66.85349341	1.236927067	2.51E-07	5.62E-06	LRRC8B	3	53688735	53713047	-	3448	protein_coding	leucine rich repeat containing 8 VRAC subunit B [Source:VGNC Symbol;Acc:VGNC:31030]	-
ENSBTAG00000026936	715.6742315	761.7261679	787.1947064	516.9071094	467.3055301	450.6143191	754.8650353	478.2756529	0.658555072	2.52E-07	5.64E-06	ZGRF1	6	12992269	13044915	+	6130	protein_coding	zinc finger GRF-type containing 1 [Source:NCBI gene;Acc:539572]	zf-GRF
ENSBTAG00000016093	1800.569055	1861.330872	1993.254744	2609.676943	2757.203995	3158.19323	1885.051557	2841.69139	-0.592184277	2.57E-07	5.73E-06	PLP2	X	87216017	87219386	+	1368	protein_coding	Bos taurus proteolipid protein 2 (PLP2), mRNA. [Source:RefSeq mRNA;Acc:NM_203363]	-
ENSBTAG00000011482	113.8347671	79.97125122	102.0437582	21.11877295	40.54711758	29.19747208	98.61659219	30.28778754	1.703952713	2.59E-07	5.76E-06	SLC43A2	19	22690663	22730143	-	3195	protein_coding	Bos taurus solute carrier family 43 member 2 (SLC43A2), mRNA. [Source:RefSeq mRNA;Acc:NM_001075546]	MFS_1
novel.219	606.7888021	562.7976805	475.2323598	256.442243	243.2827055	355.2359103	548.2729475	284.9869529	0.943279465	2.59E-07	5.76E-06	-	11	98138010	98147396	+	2493	-	PF00780:CNH domain	CNH
ENSBTAG00000006969	19503.36014	19273.07154	17120.0271	13325.94573	13347.09743	13064.89551	18632.15293	13245.97956	0.49223549	2.59E-07	5.76E-06	TUBB	23	28298359	28302018	-	1744	protein_coding	tubulin beta class I [Source:NCBI gene;Acc:615087]	Tubulin
ENSBTAG00000014728	365.2611223	335.8792551	324.5963357	547.076785	531.1672403	636.5048914	341.9122377	571.5829722	-0.741652933	2.63E-07	5.84E-06	TAPBPL	5	103922269	103929825	-	2886	protein_coding	Bos taurus TAP binding protein like (TAPBPL), mRNA. [Source:RefSeq mRNA;Acc:NM_001102121]	C1-set
ENSBTAG00000018010	152.4396012	135.9511271	123.4243552	54.30541616	64.87538813	51.58220068	137.2716945	56.92100165	1.270562756	2.64E-07	5.84E-06	ABCA4	3	49386861	49530772	+	8136	protein_coding	Bos taurus ATP binding cassette subfamily A member 4 (ABCA4), mRNA. [Source:RefSeq mRNA;Acc:NM_174221]	ABC_tran
ENSBTAG00000016504	496.9135051	513.8152891	447.0488456	301.6967564	294.9802804	241.3657692	485.92588	279.347602	0.799017352	2.65E-07	5.86E-06	AGAP1	3	115044731	115604936	+	2697	protein_coding	ArfGAP with GTPase domain, ankyrin repeat and PH domain 1 [Source:NCBI gene;Acc:522241]	Ras
ENSBTAG00000013581	432.572115	380.863084	436.3585471	631.5518768	665.9864062	733.8297983	416.5979154	677.1226938	-0.700776991	2.65E-07	5.86E-06	LEPROTL1	27	26280336	26290168	+	848	protein_coding	Bos taurus leptin receptor overlapping transcript like 1 (LEPROTL1), mRNA. [Source:RefSeq mRNA;Acc:NM_001037462]	-
ENSBTAG00000013856	796.8433698	814.7071218	871.745249	1166.560792	1264.056391	1413.157649	827.7652469	1281.258277	-0.630331118	2.67E-07	5.90E-06	SSBP2	7	81401606	81711503	-	1832	protein_coding	Bos taurus single stranded DNA binding protein 2 (SSBP2), mRNA. [Source:RefSeq mRNA;Acc:NM_001035478]	-
ENSBTAG00000009427	379.1192679	334.8796145	333.3429436	179.0067422	194.6261644	211.1950481	349.113942	194.9426515	0.840286501	2.71E-07	5.97E-06	PPM1D	19	12299125	12359979	-	2969	protein_coding	Bos taurus protein phosphatase, Mg2+/Mn2+ dependent 1D (PPM1D), mRNA. [Source:RefSeq mRNA;Acc:NM_001191444]	PP2C
ENSBTAG00000040308	4997.84121	5166.142829	6247.99354	8603.385838	9092.691117	15510.67042	5470.659193	11068.91579	-1.016740136	2.78E-07	6.11E-06	RPS13	15	35408334	35411050	+	520	protein_coding	ribosomal protein S13 [Source:NCBI gene;Acc:535668]	-
ENSBTAG00000013909	19.7973508	19.99281281	19.43690633	67.37894227	66.902744	70.073933	19.74235665	68.11853976	-1.786956428	2.78E-07	6.11E-06	BOC	1	57945013	58023212	+	5662	protein_coding	Bos taurus BOC cell adhesion associated, oncogene regulated (BOC), mRNA. [Source:RefSeq mRNA;Acc:NM_001206219]	I-set
ENSBTAG00000018178	1367.99694	1360.510911	1504.41655	1940.9158	2167.243435	2110.977231	1410.974801	2073.045489	-0.555004269	2.79E-07	6.12E-06	NARF	19	50101209	50118199	-	1911	protein_coding	nuclear prelamin A recognition factor [Source:VGNC Symbol;Acc:VGNC:55858]	Fe_hyd_lg_C
ENSBTAG00000019604	2326.188719	2251.190722	2185.680117	1511.50075	1407.998658	1662.30941	2254.353186	1527.269606	0.561619155	2.79E-07	6.12E-06	VASP	18	53104828	53118627	+	2556	protein_coding	Bos taurus vasodilator stimulated phosphoprotein (VASP), mRNA. [Source:RefSeq mRNA;Acc:NM_001038110]	-
ENSBTAG00000018569	975.019527	920.6690297	1001.000676	1493.398944	1424.217505	1354.762705	965.5630776	1424.126385	-0.560507892	2.81E-07	6.16E-06	CUL4B	X	5084763	5130143	-	5164	protein_coding	cullin 4B [Source:VGNC Symbol;Acc:VGNC:27833]	Cullin
ENSBTAG00000004552	1703.562036	1885.322248	1878.576997	2556.377183	2585.892424	2680.327937	1822.487094	2607.532514	-0.516793696	2.84E-07	6.22E-06	PBXIP1	3	15627232	15643667	+	3567	protein_coding	PBX homeobox interacting protein 1 [Source:VGNC Symbol;Acc:VGNC:32611]	-
ENSBTAG00000002620	648.3632388	723.7398236	729.8558327	437.4602968	468.319208	412.6576054	700.652965	439.4790368	0.673144042	2.90E-07	6.33E-06	DNA2	28	24811860	24849160	-	3247	protein_coding	Bos taurus DNA replication helicase/nuclease 2 (DNA2), mRNA. [Source:RefSeq mRNA;Acc:NM_001192802]	-
ENSBTAG00000000653	62.36165503	73.97340738	73.86024406	139.7861638	173.3389276	161.5593455	70.06510216	158.2281457	-1.175159335	2.91E-07	6.34E-06	PPP1R16B	13	67598734	67706157	+	6291	protein_coding	Bos taurus protein phosphatase 1 regulatory subunit 16B (PPP1R16B), mRNA. [Source:RefSeq mRNA;Acc:NM_174824]	-
ENSBTAG00000007427	523.6399287	520.8127736	476.2042051	277.5610159	323.3632627	209.2485499	506.8856358	270.0576095	0.909005546	3.06E-07	6.66E-06	PPRC1	26	22794880	22818924	+	5540	protein_coding	Bos taurus peroxisome proliferator-activated receptor gamma, coactivator-related 1 (PPRC1), mRNA. [Source:RefSeq mRNA;Acc:NM_001205755]	RRM_1
ENSBTAG00000017435	140.5611907	143.9482522	170.0729304	289.6288862	258.4878746	322.145442	151.5274578	290.0874009	-0.936901919	3.15E-07	6.85E-06	KCTD7	25	28204182	28215217	+	4920	protein_coding	Bos taurus potassium channel tetramerization domain containing 7 (KCTD7), mRNA. [Source:RefSeq mRNA;Acc:NM_001102545]	K_tetra
novel.1357	34.6453639	35.98706305	25.26797823	0	4.054711758	0.973249069	31.96680173	1.675986942	4.262340419	3.18E-07	6.90E-06	-	4	94660871	94661869	+	999	-	-	-
ENSBTAG00000004553	30253.32163	30395.07331	29707.36764	20713.49364	20645.57859	23308.34196	30118.58752	21555.80473	0.482566463	3.18E-07	6.90E-06	TPM4	7	6898966	6924156	-	2919	protein_coding	tropomyosin 4 [Source:VGNC Symbol;Acc:VGNC:36254]	-
ENSBTAG00000039453	136.6017205	135.9511271	126.3398912	62.350663	47.64286315	57.42169509	132.9642463	55.80507375	1.252089094	3.21E-07	6.96E-06	-	18	65712918	65718607	+	3382	protein_coding	zinc finger protein 324A [Source:NCBI gene;Acc:100847773]	KRAB
ENSBTAG00000002178	4760.273	4749.292682	4568.644833	7014.449587	7579.269953	6145.094624	4692.736838	6912.938055	-0.558841123	3.24E-07	7.00E-06	PPL	25	3948864	3996463	-	5688	protein_coding	periplakin [Source:VGNC Symbol;Acc:VGNC:33208]	-
ENSBTAG00000000752	312.7981427	375.8648808	360.5546124	180.012398	211.8586893	188.8103195	349.739212	193.5604689	0.853663905	3.25E-07	7.03E-06	SGO1	1	157392691	157410804	-	2823	protein_coding	Bos taurus shugoshin 1 (SGO1), mRNA. [Source:RefSeq mRNA;Acc:NM_001081617]	-
ENSBTAG00000007399	5320.538028	5563.000163	6147.893473	8196.095216	7794.169677	9197.203706	5677.143888	8395.822866	-0.564514213	3.26E-07	7.03E-06	LAMP2	X	4940703	5023623	-	4700	protein_coding	Bos taurus lysosomal associated membrane protein 2 (LAMP2), transcript variant 2, mRNA. [Source:RefSeq mRNA;Acc:NM_001034570]	-
novel.1238	4165.362609	3597.706664	3560.84124	2050.532288	2090.203911	967.409575	3774.636838	1702.715258	1.148620253	3.32E-07	7.15E-06	-	29	46651500	46702980	+	34719	-	-	-
ENSBTAG00000011966	15109.33813	15187.54025	14781.76726	10488.99057	10231.05144	7652.657433	15026.21521	9457.56648	0.667967675	3.41E-07	7.33E-06	LAMC1	16	64062643	64183738	+	7602	protein_coding	Bos taurus laminin subunit gamma 1 (LAMC1), mRNA. [Source:RefSeq mRNA;Acc:NM_001206817]	Laminin_EGF
novel.166	36.62509898	42.98454753	26.23982355	81.45812424	124.6823866	115.8166393	35.28315669	107.31905	-1.606087966	3.42E-07	7.35E-06	-	10	100614358	100617093	-	1889	-	-	-
ENSBTAG00000019317	386.0483406	428.8458347	360.5546124	206.1594502	234.159604	231.6332785	391.8162626	223.9841109	0.80652631	3.43E-07	7.35E-06	GPS1	19	50814166	50821416	-	4285	protein_coding	G protein pathway suppressor 1 [Source:VGNC Symbol;Acc:VGNC:29612]	-
ENSBTAG00000020455	989.8675401	877.6844822	866.8860224	597.3595777	609.2204416	515.8220068	911.4793482	574.1340087	0.66704977	3.48E-07	7.46E-06	ITPR1	22	21523823	21876681	-	8574	protein_coding	inositol 1,4,5-trisphosphate receptor type 1 [Source:VGNC Symbol;Acc:VGNC:30346]	Ion_trans
ENSBTAG00000019458	543.4372795	536.8070238	597.6848697	812.5699307	869.7356721	980.0618129	559.3097243	887.4558052	-0.666077065	3.55E-07	7.60E-06	ASB3	11	36401341	36519701	-	3369	protein_coding	Bos taurus ankyrin repeat and SOCS box containing 3 (ASB3), mRNA. [Source:RefSeq mRNA;Acc:NM_001076927]	SOCS_box
ENSBTAG00000025564	1516.477071	1754.369324	2006.860579	2904.334109	2812.956282	4836.074626	1759.235658	3517.788339	-0.999762973	3.58E-07	7.64E-06	-	10	42657516	42657836	-	321	protein_coding	ribosomal protein L36a like [Source:NCBI gene;Acc:613592]	-
ENSBTAG00000005397	10062.99341	9779.484384	11086.81137	14772.07885	14109.38324	14377.8085	10309.76306	14419.75686	-0.484022826	3.58E-07	7.64E-06	CD46	16	75582021	75621057	-	4571	protein_coding	Bos taurus CD46 molecule (CD46), transcript variant 4, mRNA. [Source:RefSeq mRNA;Acc:NM_001242561]	Sushi
ENSBTAG00000048508	25.73655604	24.99101601	13.60583443	0	0	0	21.44446883	0	6.868460566	3.59E-07	7.66E-06	INHBA	4	79288772	79302445	+	3822	protein_coding	inhibin subunit beta A [Source:NCBI gene;Acc:281867]	TGFb_propeptide
ENSBTAG00000021681	334.5752285	361.8699118	347.9206233	215.2103529	169.2842159	127.4956281	348.1219212	170.663399	1.029161295	3.63E-07	7.73E-06	PRR11	19	10125434	10153162	+	1286	protein_coding	Bos taurus proline rich 11 (PRR11), mRNA. [Source:RefSeq mRNA;Acc:NM_001098137]	-
ENSBTAG00000039446	14.8480131	9.996406403	14.57767975	47.26582517	52.71125285	76.88667648	13.14069975	58.95458484	-2.165437677	3.67E-07	7.80E-06	-	13	73497774	73555155	+	1306	protein_coding	elafin-like [Source:NCBI gene;Acc:100850808]	-
ENSBTAG00000000900	664.2011194	625.7750408	678.348031	392.2057834	443.9909375	330.9046836	656.1080637	389.0338015	0.754539499	3.71E-07	7.88E-06	LRRC8C	3	53555337	53648204	-	3520	protein_coding	Bos taurus leucine rich repeat containing 8 VRAC subunit C (LRRC8C), mRNA. [Source:RefSeq mRNA;Acc:NM_001099039]	-
ENSBTAG00000011765	4102.011086	3899.598138	3424.782896	5592.452208	5559.00982	7246.812571	3808.797373	6132.7582	-0.687259847	3.73E-07	7.90E-06	GABARAPL1	5	99764511	99773990	-	1926	protein_coding	Bos taurus GABA type A receptor associated protein like 1 (GABARAPL1), mRNA. [Source:RefSeq mRNA;Acc:NM_001033616]	-
ENSBTAG00000040190	234.598607	266.904051	250.7360917	384.1605365	450.0730051	528.4742447	250.7462499	454.2359288	-0.857559829	3.74E-07	7.92E-06	CCDC88B	29	42630756	42645750	+	5168	protein_coding	Bos taurus coiled-coil domain containing 88B (CCDC88B), mRNA. [Source:RefSeq mRNA;Acc:NM_001192279]	-
ENSBTAG00000010350	1055.198798	971.6507024	1104.988125	712.0043452	698.4241003	622.8794044	1043.945875	677.7692833	0.623439493	3.75E-07	7.94E-06	USP53	6	6014820	6054142	-	3339	protein_coding	ubiquitin specific peptidase 53 [Source:NCBI gene;Acc:107131223]	UCH
ENSBTAG00000008575	379.1192679	399.8562561	367.3575297	764.2984496	825.1338427	535.2869882	382.1110179	708.2397602	-0.890018192	3.76E-07	7.94E-06	CGNL1	10	52768945	52889275	-	5531	protein_coding	cingulin like 1 [Source:VGNC Symbol;Acc:VGNC:27259]	Myosin_tail_1
ENSBTAG00000002464	93.04754877	71.9741261	85.52238786	17.09614953	32.43769406	8.759241624	83.51468758	19.43102841	2.107770904	3.85E-07	8.12E-06	PLCH2	16	50361199	50426588	-	5811	protein_coding	phospholipase C eta 2 [Source:VGNC Symbol;Acc:VGNC:32991]	PI-PLC-X
ENSBTAG00000014583	1344.240119	1353.513427	1103.044434	803.519028	769.381556	848.6731885	1266.93266	807.1912575	0.650158173	3.88E-07	8.17E-06	CALM3	18	53736653	53746134	+	2514	protein_coding	Bos taurus calmodulin 3 (CALM3), mRNA. [Source:RefSeq mRNA;Acc:NM_001046249]	-
ENSBTAG00000001781	315.7677453	323.8835675	325.568181	171.9671512	186.5167409	192.7033157	321.7398313	183.7290693	0.808130314	3.96E-07	8.34E-06	TOMM40	18	52618777	52630573	+	2074	protein_coding	translocase of outer mitochondrial membrane 40 [Source:VGNC Symbol;Acc:VGNC:49148]	-
ENSBTAG00000004769	182.1356274	173.9374714	199.2282899	320.8042177	320.3222289	464.2398061	185.1004629	368.4554175	-0.993474593	4.01E-07	8.43E-06	NEIL2	8	7625912	7636935	-	1843	protein_coding	Bos taurus nei like DNA glycosylase 2 (NEIL2), mRNA. [Source:RefSeq mRNA;Acc:NM_001013003]	H2TH
ENSBTAG00000010835	256.3756929	225.9187847	293.4972856	456.5677581	420.6763449	477.8652931	258.5972544	451.703132	-0.804457742	4.13E-07	8.66E-06	CRELD1	22	16820562	16828799	-	1856	protein_coding	Bos taurus cysteine rich with EGF like domains 1 (CRELD1), mRNA. [Source:RefSeq mRNA;Acc:NM_001014851]	EGF_CA
ENSBTAG00000033690	270.2338384	245.9115975	306.1312747	164.9275602	102.3814719	114.8433902	274.0922369	127.3841408	1.105813897	4.14E-07	8.67E-06	BARD1	2	102760020	102854286	-	4520	protein_coding	BRCA1 associated RING domain 1 [Source:VGNC Symbol;Acc:VGNC:26420]	-
ENSBTAG00000002148	1407.591642	1194.570565	1167.186225	1846.384149	1869.22212	2221.927625	1256.449477	1979.177965	-0.655663647	4.19E-07	8.76E-06	RAB3D	7	15736270	15747432	-	3578	protein_coding	RAB3D, member RAS oncogene family [Source:VGNC Symbol;Acc:VGNC:33652]	Ras
ENSBTAG00000017582	527.5993989	521.8124142	513.1343271	322.8155294	314.2401612	341.6104234	520.8487134	326.222038	0.674787738	4.26E-07	8.88E-06	CHEK1	29	29033507	29051869	+	2807	protein_coding	checkpoint kinase 1 [Source:VGNC Symbol;Acc:VGNC:50058]	Pkinase
ENSBTAG00000011351	1671.886275	1555.440836	1417.922317	1022.752004	1059.293447	840.8871959	1548.416476	974.3108823	0.668498722	4.26E-07	8.88E-06	TMEM259	7	43523685	43530420	-	2503	protein_coding	transmembrane protein 259 [Source:VGNC Symbol;Acc:VGNC:36067]	-
ENSBTAG00000002526	664.2011194	679.7556354	813.43453	1180.639974	1051.184023	1422.890139	719.1304283	1218.238045	-0.760515061	4.28E-07	8.92E-06	BDH2	6	21762234	21789601	+	1281	protein_coding	Bos taurus 3-hydroxybutyrate dehydrogenase 2 (BDH2), mRNA. [Source:RefSeq mRNA;Acc:NM_001034488]	-
novel.1215	335.5650961	307.8893172	277.9477605	176.9954304	130.7644542	170.3185871	307.1340579	159.3594906	0.946055078	4.30E-07	8.94E-06	-	28	28333128	28356658	-	8970	-	PF00078:Reverse transcriptase (RNA-dependent DNA polymerase)	RVT_1
ENSBTAG00000001504	667.170722	690.7516824	594.7693337	432.4320176	381.1429052	400.0053675	650.8972461	404.5267634	0.686061721	4.30E-07	8.94E-06	NOP14	6	115790395	115806223	+	3841	protein_coding	NOP14 nucleolar protein [Source:VGNC Symbol;Acc:VGNC:32165]	-
ENSBTAG00000014791	149.4699986	151.9453773	146.7486428	64.36197471	51.69757491	76.88667648	149.3880062	64.3154087	1.214500084	4.32E-07	8.97E-06	CTH	3	74766636	74793722	-	2182	protein_coding	Bos taurus cystathionine gamma-lyase (CTH), mRNA. [Source:RefSeq mRNA;Acc:NM_001024567]	Cys_Met_Meta_PP
ENSBTAG00000012212	2924.068713	2902.956419	2977.73405	2039.470074	2133.792063	1720.704355	2934.919728	1964.655497	0.579171943	4.34E-07	9.00E-06	CYP26B1	11	12376837	12396521	+	5373	protein_coding	cytochrome P450, family 26, subfamily B, polypeptide 1 [Source:NCBI gene;Acc:540868]	p450
ENSBTAG00000015190	381.0990029	350.8738647	332.3710983	187.051989	223.0091467	188.8103195	354.781322	199.6238184	0.829885915	4.35E-07	9.00E-06	RMC1	24	33105396	33127532	-	2227	protein_coding	Bos taurus regulator of MON1-CCZ1 (RMC1), mRNA. [Source:RefSeq mRNA;Acc:NM_001205470]	-
ENSBTAG00000001668	145.5105284	145.9475335	173.9603117	73.4128774	65.88906606	71.04718206	155.1394578	70.11637518	1.145848501	4.36E-07	9.01E-06	WNT7A	22	58146712	58210942	+	1433	protein_coding	Wnt family member 7A [Source:VGNC Symbol;Acc:VGNC:36963]	wnt
ENSBTAG00000021713	151.4497336	160.9421431	135.086499	71.40156569	65.88906606	63.26118951	149.1594586	66.85060709	1.157886095	4.37E-07	9.01E-06	MAMLD1	X	33093515	33213252	+	5850	protein_coding	mastermind like domain containing 1 [Source:VGNC Symbol;Acc:VGNC:56928]	-
ENSBTAG00000012082	1282.868332	1234.556191	1323.653321	772.3436965	816.0107413	931.3993594	1280.359281	839.9179324	0.608061236	4.38E-07	9.02E-06	TNFRSF12A	25	2435936	2439695	+	1269	protein_coding	Bos taurus TNF receptor superfamily member 12A (TNFRSF12A), transcript variant 2, mRNA. [Source:RefSeq mRNA;Acc:NM_001206328]	-
ENSBTAG00000016711	144.5206609	122.9557988	188.5379914	37.20926663	72.98481164	51.58220068	152.004817	53.92542632	1.495967194	4.40E-07	9.06E-06	PPIF	28	34966650	34973573	+	1463	protein_coding	peptidylprolyl isomerase F [Source:VGNC Symbol;Acc:VGNC:33198]	Pro_isomerase
ENSBTAG00000046623	141.5510582	120.9565175	106.9029848	218.2273205	289.9118907	657.9163709	123.1368535	388.685194	-1.658850564	4.42E-07	9.07E-06	-	13	63799750	63800272	-	523	protein_coding	-	KOW
ENSBTAG00000000160	329.6258908	364.8688337	329.4555623	535.0089147	530.1535623	629.6921479	341.3167623	564.9515417	-0.727383247	4.42E-07	9.07E-06	-	1	143219189	143242441	-	3155	protein_coding	cystathionine-beta-synthase [Source:NCBI gene;Acc:514525]	PALP
ENSBTAG00000017992	4074.294795	4040.547468	4502.559352	5742.294931	5865.140558	6096.432171	4205.800538	5901.28922	-0.488635502	4.56E-07	9.36E-06	CD164	9	40759545	40770266	+	1198	protein_coding	Bos taurus CD164 molecule (CD164), mRNA. [Source:RefSeq mRNA;Acc:NM_001046041]	-
ENSBTAG00000047367	490.9742999	496.8213982	587.9664165	806.5359955	808.9149957	883.710155	525.2540382	833.0537154	-0.665308045	4.68E-07	9.59E-06	CMTR2	18	39766889	39769183	+	2295	protein_coding	cap methyltransferase 2 [Source:VGNC Symbol;Acc:VGNC:27490]	-
ENSBTAG00000014730	2184.637661	2242.193956	1964.099385	1508.483782	1481.997147	1394.665916	2130.310334	1461.715615	0.543410461	4.73E-07	9.69E-06	NCAPD2	5	103877217	103901222	-	4942	protein_coding	non-SMC condensin I complex subunit D2 [Source:VGNC Symbol;Acc:VGNC:31901]	-
ENSBTAG00000017533	880.9821107	865.6887945	888.2666193	1358.64106	1224.522951	1647.710674	878.3125082	1410.291562	-0.68334301	4.89E-07	9.99E-06	LRRC1	23	6591481	6728066	-	3703	protein_coding	Bos taurus leucine rich repeat containing 1 (LRRC1), mRNA. [Source:RefSeq mRNA;Acc:NM_001205469]	-
ENSBTAG00000012921	126.7030451	154.9442992	152.5797147	72.40722154	54.73860873	58.39494416	144.742353	61.84692481	1.2268863	4.93E-07	1.01E-05	KIF24	8	75651802	75724181	-	5008	protein_coding	Bos taurus kinesin family member 24 (KIF24), mRNA. [Source:RefSeq mRNA;Acc:NM_001193229]	Kinesin
ENSBTAG00000010792	1617.443561	1475.469585	1681.292398	1092.142258	1061.320803	1112.423686	1591.401848	1088.628916	0.547801818	5.01E-07	1.02E-05	SEH1L	24	43196058	43216524	+	4113	protein_coding	SEH1 like nucleoporin [Source:VGNC Symbol;Acc:VGNC:34420]	-
ENSBTAG00000006614	674.0997948	792.7150278	678.348031	438.4659527	475.4149536	379.5671371	715.0542845	431.1493478	0.730109328	5.03E-07	1.02E-05	TMCC1	22	55948231	56101053	+	4386	protein_coding	Bos taurus transmembrane and coiled-coil domain family 1 (TMCC1), mRNA. [Source:RefSeq mRNA;Acc:NM_001101925]	-
ENSBTAG00000003208	638.4645634	640.7696504	708.4752358	1046.887745	929.5426705	1098.798199	662.5698165	1025.076205	-0.62961895	5.05E-07	1.03E-05	RAB33B	17	18245545	18266086	-	3628	protein_coding	Bos taurus RAB33B, member RAS oncogene family (RAB33B), mRNA. [Source:RefSeq mRNA;Acc:NM_001083440]	Ras
ENSBTAG00000014855	2010.420974	1956.296733	1883.436223	1287.239494	1268.111102	874.9509134	1950.05131	1143.433837	0.770337947	5.09E-07	1.03E-05	MICAL2	15	40374952	40604561	-	7722	protein_coding	microtubule associated monooxygenase, calponin and LIM domain containing 2 [Source:VGNC Symbol;Acc:VGNC:31458]	CH
ENSBTAG00000020736	230.6391368	203.9266906	211.862279	109.6164882	79.06687928	117.7631374	215.4760355	102.1488349	1.075977267	5.13E-07	1.04E-05	CD40	13	74842191	74853116	+	1520	protein_coding	CD40 molecule [Source:VGNC Symbol;Acc:VGNC:27033]	-
ENSBTAG00000000434	5314.598823	5401.05838	4272.232012	2913.385011	2700.438031	3561.118345	4995.963071	3058.313796	0.707934779	5.14E-07	1.04E-05	CRYAB	15	22242326	22246349	-	1407	protein_coding	crystallin alpha B [Source:VGNC Symbol;Acc:VGNC:27732]	-
ENSBTAG00000021999	2059.914351	2084.250735	2004.916888	2737.395237	2903.173619	3142.621245	2049.693991	2927.730033	-0.514444794	5.19E-07	1.05E-05	CPT1A	29	46164784	46225440	-	5488	protein_coding	Bos taurus carnitine palmitoyltransferase 1A (CPT1A), mRNA. [Source:RefSeq mRNA;Acc:NM_001304989]	-
ENSBTAG00000015177	4105.970556	4119.519079	3590.968445	2095.786801	2089.190233	2906.121721	3938.81936	2363.699585	0.736591346	5.28E-07	1.07E-05	PRSS23	29	8736369	8744974	-	1614	protein_coding	Bos taurus serine protease 23 (PRSS23), mRNA. [Source:RefSeq mRNA;Acc:NM_001080306]	Trypsin
novel.1827	84.13874091	67.97556354	66.08548153	15.08483782	28.3829823	11.67898883	72.73326199	18.38226965	1.98741324	5.32E-07	1.07E-05	-	X	98249782	98363128	+	1613	-	-	-
ENSBTAG00000002350	1003.725686	964.6532179	935.8870398	692.8968839	588.9468828	532.3672409	968.0886478	604.7370026	0.679025437	5.37E-07	1.08E-05	PIK3R2	7	5060769	5073385	-	3673	protein_coding	Bos taurus phosphoinositide-3-kinase regulatory subunit 2 (PIK3R2), mRNA. [Source:RefSeq mRNA;Acc:NM_174576]	SH2
ENSBTAG00000009586	262.3148981	244.9119569	300.3002028	125.7069818	162.1884703	118.7363865	269.1756859	135.5439462	0.990651358	5.40E-07	1.09E-05	CDC25A	22	51693533	51717133	+	4123	protein_coding	cell division cycle 25A [Source:VGNC Symbol;Acc:VGNC:27062]	Rhodanese
ENSBTAG00000024157	508.7919156	524.8113362	518.965399	741.168365	792.6961487	836.9941997	517.5228836	790.2862378	-0.610870948	5.44E-07	1.09E-05	WDR60	4	119527577	119572571	+	3689	protein_coding	WD repeat domain 60 [Source:VGNC Symbol;Acc:VGNC:36909]	-
ENSBTAG00000007480	1020.553434	1131.593205	1104.988125	1554.743951	1747.580768	2387.379967	1085.711588	1896.568229	-0.804876847	5.46E-07	1.10E-05	CIRBP	7	43707339	43712131	+	3207	protein_coding	Bos taurus cold inducible RNA binding protein (CIRBP), mRNA. [Source:RefSeq mRNA;Acc:NM_001034278]	RRM_1
ENSBTAG00000009656	18.80748326	36.98670369	28.18351418	140.7918197	65.88906606	101.2179032	27.99256704	102.6329296	-1.874957885	5.75E-07	1.15E-05	-	23	25583083	25589209	-	1532	protein_coding	major histocompatibility complex, class II, DQ alpha 2 [Source:NCBI gene;Acc:282535]	C1-set
ENSBTAG00000018474	233.6087395	192.9306436	208.9467431	112.6334557	102.3814719	107.0573976	211.8287087	107.3574418	0.980490018	5.78E-07	1.16E-05	IL6R	3	16119373	16173990	-	4971	protein_coding	interleukin 6 receptor [Source:VGNC Symbol;Acc:VGNC:30167]	-
ENSBTAG00000021048	463.2580088	500.8199608	486.8945036	776.3663199	732.8891502	1093.931954	483.657491	867.7291414	-0.843537213	5.86E-07	1.17E-05	ADM	15	42377564	42380500	-	2233	protein_coding	Bos taurus adrenomedullin (ADM), mRNA. [Source:RefSeq mRNA;Acc:NM_173888]	-
ENSBTAG00000009617	2228.191833	2170.21983	2152.637376	1482.33673	1590.460687	1585.422734	2183.683013	1552.74005	0.491919437	5.88E-07	1.18E-05	SLC2A1	3	103309039	103337423	+	2725	protein_coding	Bos taurus solute carrier family 2 member 1 (SLC2A1), mRNA. [Source:RefSeq mRNA;Acc:NM_174602]	Sugar_tr
ENSBTAG00000001146	1568.940051	1605.422868	1436.387378	877.9375612	943.7341616	504.1430179	1536.916766	775.2715803	0.987531327	6.05E-07	1.21E-05	HIVEP2	9	80196707	80237534	-	7855	protein_coding	human immunodeficiency virus type I enhancer binding protein 2 [Source:NCBI gene;Acc:540396]	-
ENSBTAG00000012646	337.5448312	269.9029729	286.6943684	160.9049368	156.1064027	94.40515973	298.0473908	137.1388331	1.120943345	6.06E-07	1.21E-05	PLCXD2	1	56425478	56476144	+	1583	protein_coding	phosphatidylinositol specific phospholipase C X domain containing 2 [Source:VGNC Symbol;Acc:VGNC:32993]	-
novel.972	3235.876989	3041.906468	3109.905013	2207.414601	2324.363515	1987.3746	3129.22949	2173.050905	0.526179613	6.10E-07	1.21E-05	-	22	54138908	54141890	-	2983	-	-	-
novel.634	417.7241019	420.8487096	562.6984383	816.5925541	788.6414369	761.0807723	467.0904166	788.7715877	-0.755580085	6.13E-07	1.22E-05	-	18	47021258	47038061	+	6750	-	PF13912:C2H2-type zinc finger|PF00096:Zinc finger, C2H2 type	zf-C2H2
ENSBTAG00000017164	792.8838996	861.6902319	898.9569178	503.8335832	539.2766638	592.7086833	851.1770165	545.2729768	0.642314794	6.14E-07	1.22E-05	LARP4	5	29433902	29503457	-	4401	protein_coding	Bos taurus La ribonucleoprotein domain family member 4 (LARP4), mRNA. [Source:RefSeq mRNA;Acc:NM_001101189]	-
ENSBTAG00000013303	387.0382082	359.8706305	375.1322922	564.1729345	579.8237814	615.0934118	374.0137103	586.3633759	-0.648778103	6.58E-07	1.30E-05	ACSS2	13	64186743	64233568	+	2972	protein_coding	Bos taurus acyl-CoA synthetase short chain family member 2 (ACSS2), mRNA. [Source:RefSeq mRNA;Acc:NM_001105339]	AMP-binding
ENSBTAG00000055014	2786.477125	2949.93953	3308.161458	4399.744365	4180.407822	5039.483681	3014.859371	4539.878623	-0.590576457	6.58E-07	1.30E-05	SH3BGRL2	9	19256542	19330621	+	3960	protein_coding	Bos taurus SH3 domain binding glutamate rich protein like 2 (SH3BGRL2), mRNA. [Source:RefSeq mRNA;Acc:NM_001083791]	-
ENSBTAG00000016771	16459.51746	16671.00696	16782.79677	10556.36951	10353.70647	12903.33616	16637.77373	11271.13738	0.561804872	6.60E-07	1.30E-05	PLK2	20	20847409	20853378	+	2749	protein_coding	Bos taurus polo like kinase 2 (PLK2), mRNA. [Source:RefSeq mRNA;Acc:NM_001192245]	Pkinase
ENSBTAG00000046158	348.4333741	342.8767396	352.7798499	546.0711291	520.0167829	619.9596572	348.0299879	562.0158564	-0.691613461	6.69E-07	1.32E-05	CFB	23	27415355	27421377	-	2539	protein_coding	Bos taurus complement factor B (CFB), mRNA. [Source:RefSeq mRNA;Acc:NM_001040526]	Trypsin
ENSBTAG00000000978	554.3258224	505.818164	495.6411114	340.9173348	317.2811951	303.6537096	518.5950326	320.6174132	0.69388452	6.76E-07	1.33E-05	ASH2L	27	33285825	33311648	+	2521	protein_coding	Bos taurus ASH2 like, histone lysine methyltransferase complex subunit (ASH2L), mRNA. [Source:RefSeq mRNA;Acc:NM_001205473]	SPRY
ENSBTAG00000020199	472.1668166	506.8178046	630.7276104	841.7339505	865.6809603	962.5433296	536.5707439	889.9860801	-0.729907534	6.78E-07	1.34E-05	F2R	10	7945904	7963558	+	3503	protein_coding	Bos taurus coagulation factor II thrombin receptor (F2R), mRNA. [Source:RefSeq mRNA;Acc:NM_001103097]	7tm_1
ENSBTAG00000016357	2.96960262	7.997125122	6.802917216	29.16401979	45.61550728	46.71595533	5.923214986	40.49849413	-2.773912748	6.97E-07	1.37E-05	VNN2	9	70885902	70916052	-	3036	protein_coding	vanin 2 [Source:VGNC Symbol;Acc:VGNC:36808]	CN_hydrolase
ENSBTAG00000010666	586.9914513	607.7815093	617.121776	864.8640351	888.9955529	972.2758203	603.9649122	908.7118028	-0.589463355	7.06E-07	1.39E-05	KHNYN	10	20736077	20744735	-	3366	protein_coding	Bos taurus KH and NYN domain containing (KHNYN), mRNA. [Source:RefSeq mRNA;Acc:NM_001102551]	-
ENSBTAG00000005260	33472.37087	33313.02434	35505.3968	22418.08031	21113.8978	26301.08285	34096.93067	23277.68699	0.550684095	7.07E-07	1.39E-05	SPP1	6	36693193	36730559	-	2200	protein_coding	secreted phosphoprotein 1 [Source:VGNC Symbol;Acc:VGNC:35232]	-
ENSBTAG00000003588	1263.070981	1252.549722	1387.795112	1971.085475	1799.278343	1869.611462	1301.138605	1879.99176	-0.530887788	7.08E-07	1.39E-05	ZFAND1	14	80864110	80888123	+	1635	protein_coding	zinc finger AN1-type containing 1 [Source:VGNC Symbol;Acc:VGNC:50112]	zf-AN1
ENSBTAG00000004463	2069.813026	2209.205815	2084.608204	2944.560343	2938.652346	3507.589646	2121.209015	3130.267445	-0.561490303	7.15E-07	1.40E-05	KDELR1	18	55078241	55086739	-	1788	protein_coding	KDEL endoplasmic reticulum protein retention receptor 1 [Source:VGNC Symbol;Acc:VGNC:52202]	ER_lumen_recept
ENSBTAG00000009543	4575.16777	4651.327899	4950.580043	6524.695186	6757.177144	6259.938014	4725.691904	6513.936782	-0.462969473	7.23E-07	1.41E-05	ESYT1	5	57179946	57194004	-	4361	protein_coding	Bos taurus extended synaptotagmin 1 (ESYT1), mRNA. [Source:RefSeq mRNA;Acc:NM_001077943]	C2
ENSBTAG00000051467	199.9532431	188.932081	221.5807322	354.9965167	325.3906186	407.7913601	203.4886854	362.7261651	-0.834011152	7.33E-07	1.43E-05	COA6	28	7188629	7197112	+	718	protein_coding	Bos taurus cytochrome c oxidase assembly factor 6 homolog (S. cerevisiae) (COA6), transcript variant 1, mRNA. [Source:RefSeq mRNA;Acc:NM_001206642]	-
ENSBTAG00000005667	324.6765531	368.8673963	323.6244904	189.0633007	209.8313335	181.0243269	339.0561466	193.3063204	0.810838831	7.41E-07	1.45E-05	-	8	57835669	57838652	+	2984	protein_coding	-	-
ENSBTAG00000015792	52.46297962	55.97987586	89.40976912	153.8653458	154.0790468	174.2115834	65.95087487	160.7186587	-1.284194503	7.69E-07	1.50E-05	CFAP54	5	60796779	61065110	+	7977	protein_coding	cilia and flagella associated protein 54 [Source:NCBI gene;Acc:787705]	-
ENSBTAG00000038866	595.9002591	624.7754002	485.9226583	361.0304519	323.3632627	327.9849364	568.8661059	337.4595503	0.753233757	7.73E-07	1.50E-05	UBE2I	25	1039180	1050840	+	1414	protein_coding	Bos taurus ubiquitin conjugating enzyme E2 I (UBE2I), mRNA. [Source:RefSeq mRNA;Acc:NM_001099372]	UQ_con
ENSBTAG00000007331	5034.466309	5067.178406	5820.381601	7551.469814	7250.838301	8129.549477	5307.342105	7643.95253	-0.526324291	7.76E-07	1.51E-05	PLOD2	1	122349984	122471157	+	3903	protein_coding	Bos taurus procollagen-lysine,2-oxoglutarate 5-dioxygenase 2 (PLOD2), mRNA. [Source:RefSeq mRNA;Acc:NM_001101149]	-
ENSBTAG00000013920	10.88854294	19.99281281	16.52137038	52.29410445	76.02584546	59.36819323	15.80090871	62.56271438	-1.985397841	7.77E-07	1.51E-05	-	1	58075022	58113303	-	1404	protein_coding	-	-
ENSBTAG00000010622	221.730329	279.8993793	230.32734	459.5847256	456.1550728	379.5671371	243.9856828	431.7689785	-0.823439417	7.87E-07	1.52E-05	TRIM46	3	15433668	15443429	-	3289	protein_coding	Bos taurus tripartite motif containing 46 (TRIM46), mRNA. [Source:RefSeq mRNA;Acc:NM_001193127]	zf-B_box
ENSBTAG00000000224	642.4240335	659.7628226	738.6024406	1007.667166	1044.088278	1384.933426	680.2630989	1145.562957	-0.75200678	7.97E-07	1.54E-05	TSPAN15	28	25803071	25855714	+	1809	protein_coding	Bos taurus tetraspanin 15 (TSPAN15), mRNA. [Source:RefSeq mRNA;Acc:NM_001075829]	Tetraspannin
ENSBTAG00000010992	1255.152041	1322.524567	1248.821232	1750.846843	1886.454645	2265.723834	1275.49928	1967.675107	-0.625565513	8.14E-07	1.57E-05	CTSH	21	25201460	25222224	-	1440	protein_coding	Bos taurus cathepsin H (CTSH), mRNA. [Source:RefSeq mRNA;Acc:NM_001034385]	Peptidase_C1
ENSBTAG00000000820	983.9283348	1036.627344	1214.806646	1614.077647	1860.099019	3036.537096	1078.454108	2170.237921	-1.008953769	8.26E-07	1.59E-05	GNG11	4	11242533	11247552	+	745	protein_coding	Bos taurus G protein subunit gamma 11 (GNG11), mRNA. [Source:RefSeq mRNA;Acc:NM_001024523]	-
ENSBTAG00000007039	325.6664207	348.8745835	330.4274076	497.7996481	536.23563	580.0564453	334.9894706	538.0305745	-0.683809142	8.27E-07	1.59E-05	FBXO25	1	146528127	146556177	+	2103	protein_coding	Bos taurus F-box protein 25 (FBXO25), mRNA. [Source:RefSeq mRNA;Acc:NM_001076211]	-
ENSBTAG00000013050	586.0015837	556.7998366	673.4888044	947.3278152	939.6794499	1378.120682	605.4300749	1088.375982	-0.846247212	8.31E-07	1.60E-05	ZNF277	4	55985141	56120652	-	1771	protein_coding	zinc finger protein 277 [Source:VGNC Symbol;Acc:VGNC:37237]	-
ENSBTAG00000006901	600.8495968	604.7825874	591.8537978	968.4465882	840.3390118	1200.989352	599.161994	1003.258317	-0.743919087	8.35E-07	1.61E-05	NIPSNAP3A	8	94568397	94581931	+	1905	protein_coding	nipsnap homolog 3A [Source:HGNC Symbol;Acc:HGNC:23619]	-
ENSBTAG00000002202	255.3858253	257.9072852	216.7215056	119.6730467	104.4088278	45.74270626	243.3382054	89.94152691	1.437240186	8.37E-07	1.61E-05	CRAMP1	25	1246615	1285603	+	3940	protein_coding	Bos taurus cramped chromatin regulator homolog 1 (CRAMP1), mRNA. [Source:RefSeq mRNA;Acc:NM_001205874]	-
ENSBTAG00000001553	11034.05347	10733.14155	10902.16076	15898.41341	16655.74222	26446.09696	10889.78526	19666.75086	-0.852797023	8.38E-07	1.61E-05	HNRNPA1	5	25779619	25785642	-	1989	protein_coding	Bos taurus heterogeneous nuclear ribonucleoprotein A1 (HNRNPA1), mRNA. [Source:RefSeq mRNA;Acc:NM_001045911]	RRM_1
ENSBTAG00000029897	0	6.997484482	14.57767975	53.2997603	44.60182934	76.88667648	7.19172141	58.26275537	-3.014841235	8.64E-07	1.66E-05	MIR21	19	10803462	10803553	+	92	miRNA	microRNA 21 [Source:HGNC Symbol;Acc:HGNC:31586]	-
ENSBTAG00000003550	1154.185552	1138.590689	1242.018315	1761.909058	1614.788958	2073.993767	1178.264852	1816.897261	-0.624894	8.83E-07	1.69E-05	C29H11orf54	29	1056371	1080650	-	2231	protein_coding	Bos taurus chromosome 29 C11orf54 homolog (C29H11orf54), mRNA. [Source:RefSeq mRNA;Acc:NM_001046315]	-
ENSBTAG00000045904	538.4879418	548.8027115	523.8246256	341.9229906	321.3359068	358.1556575	537.0384263	340.4715183	0.65721856	8.85E-07	1.69E-05	PIM3	5	119348910	119351736	+	2516	protein_coding	Pim-3 proto-oncogene, serine/threonine kinase [Source:VGNC Symbol;Acc:VGNC:32901]	Pkinase
ENSBTAG00000003709	206.8823159	186.9327997	150.6360241	364.0474194	337.5547538	306.5734569	181.4837132	336.0585434	-0.889047095	8.92E-07	1.71E-05	ITGB8	4	29024090	29115760	+	2842	protein_coding	Bos taurus integrin subunit beta 8 (ITGB8), mRNA. [Source:RefSeq mRNA;Acc:NM_001192875]	-
ENSBTAG00000008758	1172.993035	1233.55655	1251.736768	856.8187883	827.1611986	855.485932	1219.428784	846.4886396	0.526625203	9.04E-07	1.72E-05	KIF20A	7	49613257	49621657	+	3013	protein_coding	Bos taurus kinesin family member 20A (KIF20A), mRNA. [Source:RefSeq mRNA;Acc:NM_001046288]	Kinesin
ENSBTAG00000025593	454.3492009	464.8328977	468.4294426	725.0778713	676.1231856	930.4261103	462.5371804	777.2090557	-0.749003743	9.20E-07	1.75E-05	CCDC32	10	36139789	36160950	-	1794	protein_coding	Bos taurus coiled-coil domain containing 32 (CCDC32), mRNA. [Source:RefSeq mRNA;Acc:NM_001075286]	-
ENSBTAG00000020653	627.5760204	639.7700098	624.8965385	411.3132446	391.2796846	429.2028396	630.7475229	410.5985896	0.61913079	9.22E-07	1.76E-05	FIP1L1	6	68940818	69005828	+	2151	protein_coding	Bos taurus factor interacting with PAPOLA and CPSF1 (FIP1L1), mRNA. [Source:RefSeq mRNA;Acc:NM_001206690]	-
ENSBTAG00000012197	397.9267511	438.8422411	444.1333097	277.5610159	253.4194849	236.4995239	426.967434	255.8266749	0.739253181	9.30E-07	1.77E-05	AP5Z1	25	39192114	39207833	-	3360	protein_coding	adaptor related protein complex 5 subunit zeta 1 [Source:VGNC Symbol;Acc:VGNC:25998]	-
ENSBTAG00000004190	7988.231049	7997.125122	8581.394145	6135.50637	6032.397418	5955.311056	8188.916772	6041.071614	0.438885413	9.35E-07	1.78E-05	ARHGAP29	3	49238269	49319832	+	4836	protein_coding	Bos taurus Rho GTPase activating protein 29 (ARHGAP29), mRNA. [Source:RefSeq mRNA;Acc:NM_001102485]	RhoGAP
ENSBTAG00000007163	1735.237798	1804.351356	2017.550877	3054.176831	2789.641689	2506.116354	1852.38001	2783.311625	-0.587321427	9.51E-07	1.80E-05	SLC44A1	8	95034378	95265375	+	2660	protein_coding	solute carrier family 44 member 1 [Source:VGNC Symbol;Acc:VGNC:56984]	-
novel.1062	238.5580772	213.923097	259.4826995	131.740917	118.6003189	126.522379	237.3212912	125.621205	0.917895011	9.58E-07	1.82E-05	-	24	57105953	57117668	-	2846	-	-	-
ENSBTAG00000015512	1659.017997	1542.445508	1823.181814	2327.087648	2429.786021	2686.167431	1674.881773	2481.0137	-0.566858444	9.67E-07	1.83E-05	HEXB	20	6801767	6834107	-	1882	protein_coding	Bos taurus hexosaminidase subunit beta (HEXB), mRNA. [Source:RefSeq mRNA;Acc:NM_001076510]	Glyco_hydro_20
ENSBTAG00000007321	2405.378122	2401.136818	2493.755082	1799.118324	1740.485022	1544.546273	2433.423341	1694.71654	0.522063258	9.73E-07	1.84E-05	SREK1	20	13439033	13484492	-	4632	protein_coding	Bos taurus splicing regulatory glutamic acid and lysine rich protein 1 (SREK1), mRNA. [Source:RefSeq mRNA;Acc:NM_001206137]	RRM_1
ENSBTAG00000010627	2413.297063	2273.182816	2498.614309	1669.388719	1668.513888	1768.393559	2395.031396	1702.098722	0.49271096	9.85E-07	1.86E-05	SF3B3	18	1578539	1618405	-	5314	protein_coding	splicing factor 3b subunit 3 [Source:VGNC Symbol;Acc:VGNC:34511]	-
novel.969	100.9664891	143.9482522	137.0301896	34.19229906	55.75228667	53.52869882	127.314977	47.82442818	1.412202218	9.93E-07	1.87E-05	-	22	43276951	43282364	-	2576	-	-	-
ENSBTAG00000011354	1010.654758	1077.61261	1286.723199	1742.801596	1623.912059	1880.317202	1124.996856	1749.010286	-0.636582585	9.95E-07	1.87E-05	NUDT9	6	102320394	102357766	+	4044	protein_coding	Bos taurus nudix hydrolase 9 (NUDT9), mRNA. [Source:RefSeq mRNA;Acc:NM_001101096]	NUDIX
novel.1646	2816.173152	2879.964685	3318.851756	4524.445691	4325.363768	4153.827028	3004.996531	4334.545495	-0.528456431	9.97E-07	1.88E-05	-	7	96469573	96475046	-	5474	-	-	-
novel.1103	3.95947016	6.997484482	15.54952506	63.35631885	41.56079552	47.6892044	8.835493236	50.86877292	-2.521753738	9.99E-07	1.88E-05	-	25	2163543	2168004	-	1303	-	PF00665:Integrase core domain	rve
ENSBTAG00000002630	821.5900583	770.7229337	544.2333773	357.0078284	428.7857684	249.1517618	712.1821231	344.9817862	1.046073004	1.01E-06	1.89E-05	MRTFA	5	111740795	111851021	-	3191	protein_coding	myocardin related transcription factor A [Source:VGNC Symbol;Acc:VGNC:55393]	SAP
ENSBTAG00000016053	530.5690015	475.8289448	462.5983707	750.2192677	717.6839811	805.8502294	489.665439	757.9178261	-0.63043742	1.04E-06	1.95E-05	ARSA	5	119942566	119945935	-	1975	protein_coding	arylsulfatase A [Source:VGNC Symbol;Acc:VGNC:50217]	Sulfatase
ENSBTAG00000016073	1601.60568	1649.407056	1853.309019	2588.55817	2367.951667	2424.363432	1701.440585	2460.29109	-0.532005887	1.04E-06	1.95E-05	UGCG	8	101283120	101320186	+	1635	protein_coding	Bos taurus UDP-glucose ceramide glucosyltransferase (UGCG), mRNA. [Source:RefSeq mRNA;Acc:NM_001076850]	-
ENSBTAG00000032083	453.3593334	483.8260699	466.4857519	288.6232303	285.8571789	195.6230629	467.8903851	256.7011574	0.866748426	1.05E-06	1.97E-05	DHX33	19	26092262	26109309	+	2505	protein_coding	DEAH-box helicase 33 [Source:VGNC Symbol;Acc:VGNC:54418]	HA2
ENSBTAG00000011044	591.940789	589.7879778	586.9945712	292.6458537	270.6520098	413.6308545	589.574446	325.642906	0.855725636	1.05E-06	1.97E-05	TACC3	6	116825809	116835029	-	3062	protein_coding	Bos taurus transforming acidic coiled-coil containing protein 3 (TACC3), mRNA. [Source:RefSeq mRNA;Acc:NM_001100305]	-
ENSBTAG00000019177	2630.078054	2377.145443	2182.764581	3423.25253	3518.476128	4534.367414	2396.662693	3825.365357	-0.674653967	1.06E-06	1.98E-05	BIN1	2	5418420	5475051	+	3008	protein_coding	bridging integrator 1 [Source:VGNC Symbol;Acc:VGNC:26497]	-
ENSBTAG00000011511	1178.93224	1233.55655	1294.497962	1976.113755	1759.744903	1697.346377	1235.662251	1811.068345	-0.551467177	1.07E-06	1.99E-05	-	3	10700383	10745178	+	2186	protein_coding	interferon gamma inducible protein 16 [Source:NCBI gene;Acc:506759]	PAAD_DAPIN
ENSBTAG00000023416	1141.317274	1214.563378	1408.203864	2021.368268	1935.111186	1761.580816	1254.694838	1906.02009	-0.603080583	1.08E-06	2.02E-05	PPP2R3A	1	133116975	133350011	-	7620	protein_coding	protein phosphatase 2 regulatory subunit B''alpha [Source:VGNC Symbol;Acc:VGNC:33258]	-
ENSBTAG00000017177	1074.006281	1102.603626	1116.650269	746.1966443	789.6551148	662.7826162	1097.753392	732.8781251	0.583152318	1.08E-06	2.02E-05	RBM25	10	84568244	84607402	+	2532	protein_coding	RNA binding motif protein 25 [Source:VGNC Symbol;Acc:VGNC:33794]	RRM_1
ENSBTAG00000008963	1031.441977	1076.61297	860.0831052	513.8901418	587.9332049	275.4294866	989.3793505	459.0842778	1.108143579	1.09E-06	2.02E-05	CIT	17	55569766	55740689	+	6890	protein_coding	citron rho-interacting serine/threonine kinase [Source:VGNC Symbol;Acc:VGNC:27375]	CNH
ENSBTAG00000010451	1465.993827	1466.472819	1330.456238	895.0337108	846.4210794	1048.189248	1420.974295	929.881346	0.611500304	1.10E-06	2.04E-05	PA2G4	5	57208094	57214801	-	1615	protein_coding	Bos taurus proliferation-associated 2G4 (PA2G4), mRNA. [Source:RefSeq mRNA;Acc:NM_001034699]	Peptidase_M24
novel.54	2861.707058	2837.979778	3082.693344	4286.105253	4679.137369	7755.821834	2927.46006	5573.688152	-0.929021243	1.12E-06	2.08E-05	-	1	76416082	76417839	-	1758	-	PF00009:Elongation factor Tu GTP binding domain|PF03144:Elongation factor Tu domain 2|PF03143:Elongation factor Tu C-terminal domain	GTP_EFTU
ENSBTAG00000049889	498.8932402	527.8102581	422.7527127	259.4592105	285.8571789	156.6931002	483.1520703	234.0031632	1.046598037	1.13E-06	2.10E-05	ZBED4	5	119288554	119291973	+	3420	protein_coding	zinc finger BED-type containing 4 [Source:NCBI gene;Acc:100852266]	zf-BED
ENSBTAG00000013153	681.0288676	624.7754002	569.5013555	395.2227509	367.965092	412.6576054	625.1018744	391.9484828	0.673145187	1.14E-06	2.11E-05	NF2	17	68758653	68833313	+	5007	protein_coding	neurofibromin 2 [Source:VGNC Symbol;Acc:VGNC:32026]	Band_41
ENSBTAG00000002527	587.9813188	591.7872591	482.035277	291.6401979	359.8556685	218.9810406	553.9346183	290.158969	0.933369557	1.15E-06	2.12E-05	ZSWIM4	7	11840008	11864893	-	6655	protein_coding	zinc finger SWIM-type containing 4 [Source:VGNC Symbol;Acc:VGNC:37384]	-
ENSBTAG00000005338	2655.81461	2675.038353	2986.480658	4077.934491	3944.220862	5577.690417	2772.44454	4533.281923	-0.709436988	1.15E-06	2.12E-05	EIF3M	15	63298794	63316294	+	2152	protein_coding	Bos taurus eukaryotic translation initiation factor 3 subunit M (EIF3M), mRNA. [Source:RefSeq mRNA;Acc:NM_001035312]	-
ENSBTAG00000010309	3555.604204	3644.689775	3384.937238	2517.156605	2637.589998	2553.805558	3528.410405	2569.517387	0.457510115	1.16E-06	2.13E-05	XPO6	25	25620580	25727702	-	4625	protein_coding	exportin 6 [Source:VGNC Symbol;Acc:VGNC:37000]	-
ENSBTAG00000017741	264.2946332	239.9137537	318.7652638	493.7770247	422.7037008	585.8959398	274.3245502	500.7922217	-0.868315603	1.18E-06	2.17E-05	HACD4	8	23375118	23404576	+	2014	protein_coding	Bos taurus 3-hydroxyacyl-CoA dehydratase 4 (HACD4), mRNA. [Source:RefSeq mRNA;Acc:NM_001076522]	-
novel.1061	39.5947016	30.98885985	32.07089545	6.033935129	5.068389697	0.973249069	34.2181523	4.025191298	3.095642953	1.20E-06	2.21E-05	-	24	57058989	57060675	-	1687	-	-	-
ENSBTAG00000054943	335.5650961	373.8655995	458.7109894	667.7554876	598.0699843	793.1979915	389.3805617	686.3411545	-0.817747163	1.20E-06	2.21E-05	MED31	19	25228815	25237222	+	3412	protein_coding	mediator complex subunit 31 [Source:NCBI gene;Acc:532868]	-
ENSBTAG00000006330	1771.862897	1745.372558	1760.983714	2319.042401	2510.880256	2500.276859	1759.406389	2443.399839	-0.473813029	1.21E-06	2.22E-05	RBM5	22	50218344	50242674	-	3311	protein_coding	Bos taurus RNA binding motif protein 5 (RBM5), mRNA. [Source:RefSeq mRNA;Acc:NM_001046374]	G-patch
ENSBTAG00000012657	690.927543	731.7369487	594.7693337	397.2340626	416.6216331	259.8575015	672.4779418	357.9043991	0.91035412	1.23E-06	2.25E-05	ZSWIM8	28	29682252	29697213	+	7062	protein_coding	zinc finger SWIM-type containing 8 [Source:VGNC Symbol;Acc:VGNC:37388]	-
ENSBTAG00000007388	95.02728385	118.9572362	77.74762532	199.1198592	188.5440967	229.6867804	97.24404846	205.7835788	-1.082501799	1.25E-06	2.28E-05	ZC3H12D	9	86692238	86726552	-	4002	protein_coding	zinc finger CCCH-type containing 12D [Source:VGNC Symbol;Acc:VGNC:37100]	-
ENSBTAG00000024918	3164.606526	3275.822378	3668.71607	2411.56274	2331.459261	2395.16596	3369.714991	2379.395987	0.502056184	1.26E-06	2.30E-05	BIRC3	15	6392614	6406143	-	2539	protein_coding	Bos taurus baculoviral IAP repeat containing 3 (BIRC3), mRNA. [Source:RefSeq mRNA;Acc:NM_001035293]	CARD
ENSBTAG00000012989	325.6664207	309.8885985	311.9623466	479.6978427	589.9605608	1008.286036	315.8391219	692.6481465	-1.133221408	1.27E-06	2.33E-05	UBE2L6	15	80815599	80829794	-	1947	protein_coding	ubiquitin conjugating enzyme E2 L6 [Source:VGNC Symbol;Acc:VGNC:36588]	UQ_con
ENSBTAG00000015794	13029.62643	13319.21189	12338.54814	9855.427377	9521.476885	9124.210025	12895.79549	9500.371429	0.440849007	1.28E-06	2.33E-05	NES	3	14159893	14168905	+	5935	protein_coding	Bos taurus nestin (NES), mRNA. [Source:RefSeq mRNA;Acc:NM_001206591]	Filament
ENSBTAG00000046671	607.7786696	573.7937275	652.1082074	418.3528356	374.0471597	371.7811445	611.2268682	388.0603799	0.655635577	1.28E-06	2.33E-05	WFS1	6	102896904	102928920	-	4099	protein_coding	wolframin ER transmembrane glycoprotein [Source:VGNC Symbol;Acc:VGNC:36936]	-
ENSBTAG00000047768	655.2923115	713.7434172	535.4867694	357.0078284	350.7325671	414.6041036	634.8408327	374.114833	0.762456873	1.28E-06	2.33E-05	COX7B	X	74502511	74507315	-	1254	protein_coding	Bos taurus cytochrome c oxidase subunit VIIb (COX7B), mRNA. [Source:RefSeq mRNA;Acc:NM_175795]	-
ENSBTAG00000005002	436.5315852	405.8541	414.9779502	199.1198592	234.159604	280.295732	419.1212118	237.8583984	0.816713809	1.30E-06	2.36E-05	GALE	2	129111017	129115576	+	1512	protein_coding	UDP-galactose-4-epimerase [Source:VGNC Symbol;Acc:VGNC:29218]	-
ENSBTAG00000010048	231.6290044	197.9288468	203.1156712	116.6560792	96.29940425	111.923643	210.8911741	108.2930421	0.961266789	1.31E-06	2.37E-05	SPC25	2	27248579	27260964	+	1193	protein_coding	Bos taurus SPC25, NDC80 kinetochore complex component (SPC25), mRNA. [Source:RefSeq mRNA;Acc:NM_001034230]	-
ENSBTAG00000016014	253.4060903	247.9108788	241.0176385	154.8710016	113.5319292	119.7096355	247.4448692	129.3708555	0.93574395	1.34E-06	2.44E-05	NUPL2	4	31829701	31843769	+	1365	protein_coding	Bos taurus nucleoporin like 2 (NUPL2), mRNA. [Source:RefSeq mRNA;Acc:NM_001077923]	-
ENSBTAG00000015346	972.0499244	986.645312	897.9850725	566.1842462	608.2067637	687.113843	952.2267696	620.5016176	0.617575176	1.35E-06	2.44E-05	NASP	3	100461046	100505190	-	2809	protein_coding	Bos taurus nuclear autoantigenic sperm protein (NASP), mRNA. [Source:RefSeq mRNA;Acc:NM_001038088]	-
ENSBTAG00000012299	848.3164819	782.7186214	853.2801879	1269.137689	1143.428716	1217.534586	828.105097	1210.033663	-0.547122873	1.35E-06	2.45E-05	REPS1	9	76639351	76729531	-	3336	protein_coding	RALBP1 associated Eps domain containing 1 [Source:VGNC Symbol;Acc:VGNC:33869]	-
ENSBTAG00000005412	8180.265351	8392.982816	7761.156698	5742.294931	6013.137537	6148.98762	8111.468288	5968.140029	0.442658441	1.38E-06	2.48E-05	NEDD4L	24	57348965	57546293	+	5205	protein_coding	neural precursor cell expressed, developmentally down-regulated 4-like, E3 ubiquitin protein ligase [Source:VGNC Symbol;Acc:VGNC:31983]	HECT
ENSBTAG00000019322	128.6827802	116.9579549	104.9592942	256.442243	204.7629438	219.9542897	116.8666764	227.0531588	-0.958398327	1.38E-06	2.49E-05	HABP2	26	34026815	34062274	+	2912	protein_coding	Bos taurus hyaluronan binding protein 2 (HABP2), mRNA. [Source:RefSeq mRNA;Acc:NM_001014868]	Trypsin
ENSBTAG00000016442	1970.826272	1996.282359	2073.917906	2941.543375	2736.930437	2702.712666	2013.675512	2793.728826	-0.472316959	1.40E-06	2.53E-05	MAP4K3	11	21552945	21736237	-	4459	protein_coding	mitogen-activated protein kinase kinase kinase kinase 3 [Source:VGNC Symbol;Acc:VGNC:31206]	CNH
ENSBTAG00000051706	236.5783421	249.9101601	230.32734	131.740917	130.7644542	133.3351225	238.9386141	131.9468312	0.856516236	1.42E-06	2.55E-05	-	X	75501761	75502696	+	936	protein_coding	-	-
ENSBTAG00000018855	791.8940321	823.7038876	820.2374472	539.0315382	502.784258	349.3964159	811.9451223	463.737404	0.808509075	1.44E-06	2.59E-05	SCAF4	1	3760509	3822150	+	3905	protein_coding	SR-related CTD associated factor 4 [Source:VGNC Symbol;Acc:VGNC:52822]	RRM_1
ENSBTAG00000055257	723.5931718	754.7286834	682.2354122	489.7544013	437.9088698	484.6780366	720.1857558	470.7804359	0.613102125	1.45E-06	2.61E-05	RAP2B	1	114554443	114558377	-	3935	protein_coding	Bos taurus RAP2B, member of RAS oncogene family (RAP2B), mRNA. [Source:RefSeq mRNA;Acc:NM_001102531]	Ras
ENSBTAG00000000660	398.9166187	365.8684743	370.2730656	237.3347817	224.0228246	227.7402822	378.3527195	229.6992962	0.719989861	1.46E-06	2.61E-05	FAM83D	13	67709013	67732524	+	2765	protein_coding	family with sequence similarity 83 member D [Source:VGNC Symbol;Acc:VGNC:28835]	-
ENSBTAG00000017761	305.8690699	340.8774583	300.3002028	182.0237097	170.2978938	103.1644014	315.6822437	151.8286683	1.056942639	1.48E-06	2.64E-05	SMC1A	X	90821253	90855974	-	4038	protein_coding	Bos taurus structural maintenance of chromosomes 1A (SMC1A), mRNA. [Source:RefSeq mRNA;Acc:NM_174614]	SMC_N
novel.1154	537.4980743	499.8203201	570.4732008	1058.955615	1064.361836	713.3915679	535.9305317	945.5696731	-0.818837901	1.48E-06	2.65E-05	-	26	16301813	16320070	-	18092	-	PF00078:Reverse transcriptase (RNA-dependent DNA polymerase)	RVT_1
ENSBTAG00000039129	354.3725794	344.8760209	347.9206233	176.9954304	201.72191	226.7670332	349.0564079	201.8281245	0.789868968	1.49E-06	2.66E-05	-	29	48540589	48559970	+	3164	protein_coding	-	-
ENSBTAG00000007142	314.7778777	280.8990199	257.5390089	498.805304	443.9909375	761.0807723	284.4053022	567.9590046	-0.998281274	1.49E-06	2.67E-05	CPPED1	25	11393983	11531543	-	2361	protein_coding	Bos taurus calcineurin like phosphoesterase domain containing 1 (CPPED1), mRNA. [Source:RefSeq mRNA;Acc:NM_001031771]	Metallophos
ENSBTAG00000006045	30574.03871	30286.11248	28774.39613	40406.24659	40042.30596	48602.11203	29878.18244	43016.88819	-0.525818542	1.50E-06	2.68E-05	P4HB	19	51034066	51044560	+	2968	protein_coding	prolyl 4-hydroxylase subunit beta [Source:VGNC Symbol;Acc:VGNC:32538]	-
ENSBTAG00000010568	952.2525736	977.6485462	1103.044434	1485.353698	1415.094403	1541.626526	1010.981851	1480.691542	-0.550475757	1.52E-06	2.71E-05	ZBED5	15	41816381	41821678	+	2609	protein_coding	Bos taurus zinc finger, BED-type containing 5 (ZBED5), mRNA. [Source:RefSeq mRNA;Acc:NM_001099388]	-
ENSBTAG00000022799	1199.719459	1258.547566	1103.044434	747.2023001	729.8481164	442.8283266	1187.10382	639.959581	0.891694392	1.53E-06	2.73E-05	NOTCH1	11	103935364	103980160	-	8190	protein_coding	notch 1 [Source:VGNC Symbol;Acc:VGNC:32177]	EGF_CA
ENSBTAG00000045504	158.3788064	123.9554394	185.6224555	278.5666718	288.8982127	425.3098433	155.9855671	330.9249093	-1.085080759	1.54E-06	2.73E-05	-	9	41851729	41852517	-	789	protein_coding	-	Ribosomal_S4e
ENSBTAG00000021798	1203.678929	1162.582065	1228.41248	1675.422654	1627.966771	1763.527314	1198.224491	1688.972246	-0.495274002	1.54E-06	2.73E-05	ERBB2	19	40071906	40097898	+	6146	protein_coding	erb-b2 receptor tyrosine kinase 2 [Source:VGNC Symbol;Acc:VGNC:28563]	Pkinase_Tyr
ENSBTAG00000021427	251.4263552	242.9126756	262.3982355	383.1548807	415.6079552	446.7213228	252.2457554	415.1613862	-0.71890494	1.54E-06	2.74E-05	HOXB3	19	37918151	37942452	+	3194	protein_coding	homeobox B3 [Source:VGNC Symbol;Acc:VGNC:29919]	Homeobox
ENSBTAG00000052665	259.3452955	311.8878798	324.5963357	122.6900143	151.038013	183.9440741	298.609837	152.5573671	0.968285601	1.56E-06	2.76E-05	-	25	36584417	36633899	-	2023	protein_coding	cytochrome P450, subfamily IIIA, polypeptide 4 [Source:NCBI gene;Acc:507988]	p450
ENSBTAG00000013074	1145.276744	1185.573799	1254.652304	888.9997756	693.3557106	712.4183188	1195.167616	764.9246017	0.643924417	1.63E-06	2.89E-05	PPP1R15B	16	2151478	2156646	-	2097	protein_coding	protein phosphatase 1 regulatory subunit 15B [Source:VGNC Symbol;Acc:VGNC:33229]	-
ENSBTAG00000019220	717.6539666	712.7437765	622.9528479	440.4772644	455.1413948	437.9620812	684.450197	444.5269135	0.622611449	1.64E-06	2.89E-05	SMARCA4	7	15424807	15515086	+	5513	protein_coding	Bos taurus SWI/SNF related, matrix associated, actin dependent regulator of chromatin, subfamily a, member 4 (SMARCA4), mRNA. [Source:RefSeq mRNA;Acc:NM_001105614]	SNF2_N
ENSBTAG00000020418	1318.503563	1350.514505	1474.289345	2041.481385	1927.001763	1911.461172	1381.102471	1959.98144	-0.504937316	1.65E-06	2.91E-05	CA5B	X	127724914	127752302	-	3815	protein_coding	Bos taurus carbonic anhydrase 5B (CA5B), mRNA. [Source:RefSeq mRNA;Acc:NM_001080908]	-
ENSBTAG00000016864	26.72642358	31.98850049	29.1553595	92.52033864	63.86171019	109.0038958	29.29009452	88.46198153	-1.595593454	1.65E-06	2.92E-05	LBP	13	67214873	67247273	+	1924	protein_coding	Bos taurus lipopolysaccharide binding protein (LBP), mRNA. [Source:RefSeq mRNA;Acc:NM_001038674]	-
ENSBTAG00000017860	394.9571485	378.8638027	282.8069871	181.0180539	172.3252497	81.75292183	352.2093128	145.0320751	1.280912622	1.68E-06	2.97E-05	HIPK2	4	103050523	103242618	-	4286	protein_coding	Bos taurus homeodomain interacting protein kinase 2 (HIPK2), mRNA. [Source:RefSeq mRNA;Acc:NM_001101922]	Pkinase
ENSBTAG00000005458	576.1029083	559.7987586	490.7818849	348.9625816	348.7052112	322.145442	542.2278506	339.9377449	0.67367935	1.69E-06	2.97E-05	-	25	1978231	2006139	+	6617	protein_coding	TBC1 domain family member 24 [Source:NCBI gene;Acc:529002]	TBC
ENSBTAG00000010106	683.9984702	640.7696504	674.4606497	990.571017	935.6247381	983.9548091	666.4095901	970.0501881	-0.541646267	1.70E-06	3.00E-05	CCND3	23	15698661	15705476	-	1982	protein_coding	Bos taurus cyclin D3 (CCND3), mRNA. [Source:RefSeq mRNA;Acc:NM_001034709]	Cyclin_C
novel.823	44.5440393	54.98023522	48.59226583	105.5938648	124.6823866	118.7363865	49.37218012	116.3375459	-1.236807354	1.73E-06	3.04E-05	-	2	128782026	128786290	+	997	-	-	-
ENSBTAG00000011435	7025.089932	7052.464717	7372.418571	9413.944457	9445.45104	10376.78158	7149.991074	9745.392358	-0.446789922	1.78E-06	3.12E-05	NPEPPS	19	38823897	38928029	-	4088	protein_coding	Bos taurus aminopeptidase puromycin sensitive (NPEPPS), mRNA. [Source:RefSeq mRNA;Acc:NM_001193159]	-
ENSBTAG00000016208	1645.159852	1632.413166	1458.73982	1077.05742	1151.538139	1006.339538	1578.770946	1078.311699	0.550096838	1.80E-06	3.15E-05	TGM2	13	67002552	67037111	-	4615	protein_coding	Bos taurus transglutaminase 2 (TGM2), mRNA. [Source:RefSeq mRNA;Acc:NM_177507]	Transglut_core
ENSBTAG00000037996	1020.553434	905.6744201	1142.890092	1512.506406	1643.17194	1489.071076	1023.039315	1548.249807	-0.597595939	1.83E-06	3.20E-05	ARMCX3	X	50615553	50620379	-	3477	protein_coding	Bos taurus armadillo repeat containing X-linked 3 (ARMCX3), mRNA. [Source:RefSeq mRNA;Acc:NM_001192453]	-
ENSBTAG00000005464	1866.890181	1926.307514	1829.984731	3027.024123	3000.486701	2397.112458	1874.394142	2808.207761	-0.583156996	1.84E-06	3.21E-05	ADCY6	5	30987932	31009399	+	6021	protein_coding	Bos taurus adenylate cyclase 6 (ADCY6), mRNA. [Source:RefSeq mRNA;Acc:NM_001143877]	Guanylate_cyc
ENSBTAG00000000507	97.00701893	67.97556354	52.47964709	23.13008466	18.24620291	20.43823046	72.48740985	20.60483934	1.81428831	1.84E-06	3.22E-05	NR4A1	5	27820352	27839685	-	4646	protein_coding	Bos taurus nuclear receptor subfamily 4 group A member 1 (NR4A1), mRNA. [Source:RefSeq mRNA;Acc:NM_001075911]	zf-C4
ENSBTAG00000021134	755.2689331	728.7380268	669.6014231	465.6186608	485.551733	366.9148992	717.869461	439.3617643	0.70866765	1.86E-06	3.24E-05	DPP9	7	19428848	19469011	+	3806	protein_coding	dipeptidyl peptidase 9 [Source:VGNC Symbol;Acc:VGNC:28190]	-
ENSBTAG00000054324	92.05768123	111.9597517	109.8185208	42.2375459	47.64286315	33.09046836	104.6119846	40.99029247	1.353071476	1.86E-06	3.24E-05	TRABD2B	3	98278655	98494949	+	2142	protein_coding	TraB domain containing 2B [Source:NCBI gene;Acc:787081]	-
ENSBTAG00000005431	279.1426463	351.8735054	357.6390765	140.7918197	143.9422674	211.1950481	329.5517427	165.3097117	0.994487825	1.88E-06	3.27E-05	LMCD1	22	17919376	17976405	-	1721	protein_coding	Bos taurus LIM and cysteine rich domains 1 (LMCD1), mRNA. [Source:RefSeq mRNA;Acc:NM_001076222]	LIM
novel.205	451.3795983	443.8404443	534.5149241	687.8686047	785.6004031	785.411999	476.5783222	752.9603356	-0.659706816	1.88E-06	3.27E-05	-	11	71974316	71981880	+	4764	-	-	-
ENSBTAG00000014872	6753.866226	6762.568932	5688.210638	3987.425464	4237.173787	4761.134447	6401.548598	4328.5779	0.56447137	1.90E-06	3.30E-05	CAPNS1	18	46798751	46805845	+	2335	protein_coding	Bos taurus calpain small subunit 1 (CAPNS1), mRNA. [Source:RefSeq mRNA;Acc:NM_174261]	-
ENSBTAG00000018216	265.2845007	301.8914734	365.413839	137.7748521	131.7781321	193.6765648	310.863271	154.4098497	1.008824394	1.90E-06	3.30E-05	SKA1	24	49963943	49995093	+	3663	protein_coding	spindle and kinetochore associated complex subunit 1 [Source:VGNC Symbol;Acc:VGNC:34643]	-
ENSBTAG00000030942	913.6477395	963.6535772	1091.38229	1440.099184	1402.930268	1602.941217	989.5612024	1481.990223	-0.582675324	1.90E-06	3.30E-05	MRPL3	1	138384449	138441532	+	1419	protein_coding	Bos taurus mitochondrial ribosomal protein L3 (MRPL3), mRNA. [Source:RefSeq mRNA;Acc:NM_001080317]	-
ENSBTAG00000049294	487.0148297	507.8174453	609.3470135	811.5642748	813.9833854	1019.965025	534.7264295	881.8375616	-0.721743852	1.90E-06	3.30E-05	-	15	46276833	46280671	+	3209	protein_coding	-	-
ENSBTAG00000016760	490.9742999	577.7922901	447.0488456	328.8494645	288.8982127	241.3657692	505.2718119	286.3711488	0.819405587	1.94E-06	3.36E-05	LRRFIP2	22	10347060	10455986	+	2656	protein_coding	Bos taurus LRR binding FLII interacting protein 2 (LRRFIP2), mRNA. [Source:RefSeq mRNA;Acc:NM_001038070]	-
ENSBTAG00000006195	812.6812504	876.6848415	846.4772707	612.4444156	495.6885124	539.1799844	845.2811209	549.1043041	0.622321791	1.98E-06	3.43E-05	C29H11orf68	29	44025896	44029041	-	2381	protein_coding	chromosome 29 C11orf68 homolog [Source:VGNC Symbol;Acc:VGNC:56258]	-
ENSBTAG00000045588	90.07794615	98.96442339	81.63500659	172.972807	166.2431821	244.2855164	90.22579204	194.5005018	-1.109143708	2.00E-06	3.45E-05	-	7	5726148	5730509	+	1496	protein_coding	bone marrow stromal antigen 2 [Source:NCBI gene;Acc:100298356]	-
ENSBTAG00000020944	1925.292365	1766.365011	1763.89925	1250.030227	1164.715952	811.6897239	1818.518875	1075.478635	0.75798897	2.03E-06	3.51E-05	PIEZO1	18	13938926	13995874	-	8917	protein_coding	piezo type mechanosensitive ion channel component 1 [Source:VGNC Symbol;Acc:VGNC:32864]	-
ENSBTAG00000046220	59.39205241	54.98023522	59.28256431	126.7126377	119.6139969	137.2281188	57.88495064	127.8515844	-1.143337738	2.06E-06	3.54E-05	-	3	102735758	102736414	-	657	protein_coding	hypoxanthine-guanine phosphoribosyltransferase [Source:NCBI gene;Acc:510369]	Pribosyltran
ENSBTAG00000040551	1228.425617	1180.575596	1313.934868	1761.909058	1733.389276	1738.222838	1240.978694	1744.507057	-0.491262751	2.06E-06	3.55E-05	ZBTB1	10	76649277	76678871	+	4049	protein_coding	Bos taurus zinc finger and BTB domain containing 1 (ZBTB1), mRNA. [Source:RefSeq mRNA;Acc:NM_001193001]	BTB
novel.1685	2.96960262	15.99425024	5.831071899	41.23189005	60.82067637	46.71595533	8.264974921	49.58950725	-2.58792139	2.07E-06	3.56E-05	-	8	112966138	112970180	+	1651	-	-	-
ENSBTAG00000016486	5989.688485	5767.926495	5864.11464	4499.304294	4284.81665	3836.547831	5873.909873	4206.889592	0.481614731	2.09E-06	3.59E-05	SORBS2	27	15790398	16001017	-	5992	protein_coding	Bos taurus sorbin and SH3 domain containing 2 (SORBS2), mRNA. [Source:RefSeq mRNA;Acc:NM_001079787]	-
ENSBTAG00000053836	170.2572169	183.9338778	177.8476929	94.53165035	94.27204837	80.77967276	177.3462625	89.86112383	0.98135649	2.10E-06	3.60E-05	CCDC71L	4	47813589	47814290	-	702	protein_coding	coiled-coil domain containing 71 like [Source:NCBI gene;Acc:112446372]	-
ENSBTAG00000012068	289.0413217	282.8983012	282.8069871	161.9105926	157.1200806	176.1580816	284.9155367	165.0629183	0.787157825	2.10E-06	3.60E-05	BRIP1	19	11232242	11410164	+	3617	protein_coding	BRCA1 interacting protein C-terminal helicase 1 [Source:VGNC Symbol;Acc:VGNC:50067]	-
ENSBTAG00000045548	2340.046865	2435.1246	2292.583102	1786.044798	1601.611144	1437.488875	2355.918189	1608.381606	0.550766307	2.11E-06	3.60E-05	CRKL	17	72288644	72307365	+	3392	protein_coding	CRK like proto-oncogene, adaptor protein [Source:VGNC Symbol;Acc:VGNC:53897]	SH2
novel.1212	34.6453639	47.98275073	39.84565798	110.622144	111.5045733	89.53891438	40.82459087	103.8885439	-1.347449325	2.11E-06	3.61E-05	-	28	24747473	24751154	-	3682	-	-	-
ENSBTAG00000001199	1082.915089	1056.620157	1012.66282	726.0835272	678.1505415	758.161025	1050.732689	720.7983646	0.543544593	2.14E-06	3.64E-05	DAP3	3	15051165	15090850	-	2336	protein_coding	death associated protein 3 [Source:VGNC Symbol;Acc:VGNC:27876]	-
ENSBTAG00000009580	1615.463825	1680.395916	1319.76594	1031.802907	869.7356721	1037.483508	1538.541894	979.674029	0.651008943	2.14E-06	3.64E-05	SH3BGRL3	2	126837552	126839005	-	763	protein_coding	Bos taurus SH3 domain binding glutamate rich protein like 3 (SH3BGRL3), mRNA. [Source:RefSeq mRNA;Acc:NM_001034763]	-
novel.830	77.20966813	76.9723293	71.91655343	17.09614953	27.36930437	29.19747208	75.36618362	24.55430866	1.616792595	2.14E-06	3.65E-05	-	2	133625464	133640322	+	2371	-	-	-
ENSBTAG00000005979	716.664099	726.7387455	818.2937565	504.8392391	513.9347153	454.5073154	753.898867	491.0937566	0.618689905	2.16E-06	3.67E-05	HELLS	26	16021677	16041531	+	3295	protein_coding	helicase, lymphoid specific [Source:VGNC Symbol;Acc:VGNC:29805]	SNF2_N
ENSBTAG00000016869	648.3632388	633.772166	606.4314775	368.0700429	360.8693464	451.5875682	629.5222941	393.5089858	0.677383536	2.16E-06	3.67E-05	POLD3	15	53909173	53953518	+	3634	protein_coding	Bos taurus DNA polymerase delta 3, accessory subunit (POLD3), mRNA. [Source:RefSeq mRNA;Acc:NM_001167904]	-
ENSBTAG00000009036	1242.283763	1233.55655	1168.158071	901.0676459	811.9560295	764.0005195	1214.666128	825.6747316	0.557011547	2.16E-06	3.67E-05	SUPT6H	19	20098012	20129719	+	6429	protein_coding	SPT6 homolog, histone chaperone [Source:VGNC Symbol;Acc:VGNC:50619]	S1
ENSBTAG00000020807	1752.065546	1902.316138	2764.899926	3927.086113	3960.439709	3287.635356	2139.760537	3725.053726	-0.7997159	2.24E-06	3.81E-05	FAU	29	43326671	43328299	-	559	protein_coding	FAU, ubiquitin like and ribosomal protein S30 fusion [Source:NCBI gene;Acc:282847]	Ribosomal_S30
ENSBTAG00000053162	191.0444352	208.9248938	242.9613291	369.0756987	371.0061258	709.4985716	214.3102194	483.1934654	-1.173163379	2.27E-06	3.84E-05	-	13	16185032	16185825	-	732	pseudogene	-	Helicase_C
ENSBTAG00000015752	409.8051616	374.8652401	367.3575297	627.5292534	654.8359489	544.0462298	384.0093105	608.8038107	-0.66465038	2.27E-06	3.85E-05	SP110	2	118183281	118232898	-	2590	protein_coding	SP110 nuclear body protein [Source:NCBI gene;Acc:515204]	Sp100
ENSBTAG00000010444	191.0444352	220.9205815	185.6224555	339.9116789	314.2401612	394.1658731	199.1958241	349.4392377	-0.811440938	2.28E-06	3.86E-05	ERBB3	5	57215784	57236737	-	5423	protein_coding	Bos taurus erb-b2 receptor tyrosine kinase 3 (ERBB3), mRNA. [Source:RefSeq mRNA;Acc:NM_001103105]	Pkinase_Tyr
ENSBTAG00000030319	280.1325138	303.8907547	243.9331745	152.8596899	164.2158262	139.1746169	275.985481	152.0833777	0.859913516	2.29E-06	3.88E-05	GBGT1	11	103136831	103147276	-	1853	protein_coding	globoside alpha-1,3-N-acetylgalactosaminyltransferase 1 (FORS blood group) [Source:NCBI gene;Acc:618517]	-
ENSBTAG00000005862	1725.339122	1881.323685	2159.440293	1301.318676	1344.136948	1216.561337	1922.034367	1287.338987	0.578372043	2.33E-06	3.93E-05	SMC4	1	107045175	107078624	-	4510	protein_coding	Bos taurus structural maintenance of chromosomes 4 (SMC4), mRNA. [Source:RefSeq mRNA;Acc:NM_001105326]	SMC_N
ENSBTAG00000021580	1124.489526	1043.624828	927.140432	652.6706498	618.3435431	733.8297983	1031.751595	668.2813304	0.626285523	2.39E-06	4.03E-05	HNRNPA3	2	19658429	19663581	-	1143	protein_coding	Bos taurus heterogeneous nuclear ribonucleoprotein A3 (HNRNPA3), mRNA. [Source:RefSeq mRNA;Acc:NM_001205429]	RRM_1
ENSBTAG00000013825	2540.989975	2508.098367	2494.726928	1810.180539	1896.591425	1603.914466	2514.60509	1770.22881	0.506510348	2.39E-06	4.03E-05	BCAT1	5	85057073	85174596	+	3225	protein_coding	Bos taurus branched chain amino acid transaminase 1 (BCAT1), mRNA. [Source:RefSeq mRNA;Acc:NM_001083644]	-
ENSBTAG00000021420	196.9836405	201.9274093	204.0875165	370.0813546	308.1580936	342.5836724	200.9995221	340.2743735	-0.759556021	2.40E-06	4.04E-05	EPHA7	9	56751222	56958827	+	3573	protein_coding	EPH receptor A7 [Source:VGNC Symbol;Acc:VGNC:28537]	Pkinase_Tyr
ENSBTAG00000013007	1687.724156	1719.381901	1863.027472	2408.545772	2433.840733	2444.801662	1756.711176	2429.062722	-0.467478583	2.41E-06	4.04E-05	FAM210B	13	59572279	59582949	-	2891	protein_coding	Bos taurus family with sequence similarity 210 member B (FAM210B), mRNA. [Source:RefSeq mRNA;Acc:NM_001080278]	-
novel.238	165.3078792	191.9310029	200.2001352	327.8438087	294.9802804	350.369665	185.8130058	324.397918	-0.804035167	2.41E-06	4.04E-05	-	11	114017	126781	-	8102	-	-	-
ENSBTAG00000013030	1134.388201	1135.591767	1035.987107	765.3041055	786.614081	678.3546014	1101.989025	743.4242626	0.567993554	2.43E-06	4.07E-05	LRRC8A	11	99394202	99421595	+	4273	protein_coding	Bos taurus leucine rich repeat containing 8 VRAC subunit A (LRRC8A), mRNA. [Source:RefSeq mRNA;Acc:NM_001076807]	-
ENSBTAG00000021879	5164.138957	5141.151813	5035.130585	3664.609935	3879.345474	3132.888754	5113.473785	3558.948054	0.522919025	2.44E-06	4.07E-05	VCL	28	29876700	29989469	+	5926	protein_coding	Bos taurus vinculin (VCL), mRNA. [Source:RefSeq mRNA;Acc:NM_001191370]	-
ENSBTAG00000023411	128.6827802	113.959033	141.8894162	223.2555998	233.1459261	363.9951519	128.1770765	273.4655593	-1.093514198	2.44E-06	4.07E-05	-	1	135642794	135686442	-	2505	protein_coding	Bos taurus serotransferrin-like (LOC525947), mRNA. [Source:RefSeq mRNA;Acc:NM_001046279]	-
ENSBTAG00000005620	9544.302822	10264.31009	11601.88939	15726.44626	15618.74969	26563.8601	10470.16744	19303.01868	-0.882551814	2.46E-06	4.11E-05	RPS3	15	54593621	54598584	+	853	protein_coding	Bos taurus ribosomal protein S3 (RPS3), mRNA. [Source:RefSeq mRNA;Acc:NM_001034047]	-
ENSBTAG00000006712	2005.471636	2187.213721	2000.057661	2952.60559	2707.533776	3155.273483	2064.247673	2938.47095	-0.509540073	2.47E-06	4.12E-05	ECPAS	8	100805164	100912356	-	6343	protein_coding	Ecm29 proteasome adaptor and scaffold [Source:VGNC Symbol;Acc:VGNC:30551]	-
ENSBTAG00000047582	1112.611115	1109.601111	1014.60651	731.1118064	750.1216752	570.3239547	1078.939579	683.8524788	0.658115527	2.48E-06	4.13E-05	CSNK1E	5	110047995	110083317	-	3195	protein_coding	Bos taurus casein kinase 1, epsilon (CSNK1E), mRNA. [Source:RefSeq mRNA;Acc:NM_001078109]	Pkinase
ENSBTAG00000017457	1129.438863	1206.566253	1140.946402	812.5699307	744.0396076	552.8054714	1158.983839	703.1383365	0.721256934	2.55E-06	4.25E-05	STK10	20	3852216	3975388	-	4419	protein_coding	Bos taurus serine/threonine kinase 10 (STK10), mRNA. [Source:RefSeq mRNA;Acc:NM_001192627]	Pkinase
ENSBTAG00000016895	1387.794291	1346.515942	1583.136021	2024.385236	2023.301167	2353.31625	1439.148751	2133.667551	-0.568124517	2.58E-06	4.28E-05	NIPA2	2	1044598	1064844	+	1989	protein_coding	Bos taurus NIPA magnesium transporter 2 (NIPA2), mRNA. [Source:RefSeq mRNA;Acc:NM_001034298]	DUF803
ENSBTAG00000053144	64.34139011	61.9777197	67.05732684	122.6900143	134.8191659	201.4625574	64.45881222	152.9905792	-1.247605909	2.58E-06	4.28E-05	-	5	74452850	74463537	-	1384	lncRNA	-	-
ENSBTAG00000011913	991.8472752	918.6697484	832.8714363	595.348266	643.6854916	558.6449658	914.46282	599.2262411	0.609930565	2.58E-06	4.28E-05	CKAP4	5	69631578	69639265	-	2091	protein_coding	cytoskeleton associated protein 4 [Source:VGNC Symbol;Acc:VGNC:27382]	-
ENSBTAG00000039705	423.6633072	414.8508657	379.0196735	264.4874898	248.3510952	202.4358064	405.8446154	238.4247971	0.767827729	2.62E-06	4.34E-05	HGH1	14	712202	715270	-	2535	protein_coding	HGH1 homolog [Source:VGNC Symbol;Acc:VGNC:29835]	-
ENSBTAG00000008863	1167.05383	1231.557269	1363.498979	1731.739382	1810.4288	2127.522466	1254.036693	1889.896882	-0.591769358	2.64E-06	4.37E-05	TMEM87A	10	37598861	37637423	-	2687	protein_coding	Bos taurus transmembrane protein 87A (TMEM87A), mRNA. [Source:RefSeq mRNA;Acc:NM_001083515]	-
ENSBTAG00000015016	1044.310255	967.6521398	917.4219788	1464.234925	1376.574642	1369.361441	976.4614578	1403.390336	-0.523311009	2.64E-06	4.37E-05	CALCOCO1	5	26328331	26342538	+	3149	protein_coding	calcium binding and coiled-coil domain 1 [Source:VGNC Symbol;Acc:VGNC:26702]	CoCoA
ENSBTAG00000020961	188.0748326	190.9313623	249.7642464	377.1209455	380.1292273	346.4766687	209.5901471	367.9089472	-0.81119926	2.66E-06	4.41E-05	DUSP19	2	13474287	13490743	-	2370	protein_coding	Bos taurus dual specificity phosphatase 19 (DUSP19), mRNA. [Source:RefSeq mRNA;Acc:NM_001098878]	DSPc
ENSBTAG00000016126	327.6461558	381.8627246	314.8778826	200.1255151	204.7629438	197.5695611	341.4622543	200.81934	0.765710007	2.70E-06	4.45E-05	NUP85	19	56241099	56269017	-	2144	protein_coding	Bos taurus nucleoporin 85 (NUP85), mRNA. [Source:RefSeq mRNA;Acc:NM_001034387]	-
ENSBTAG00000006990	171.2470844	164.9407056	207.0030524	292.6458537	402.430142	315.3326985	181.0636142	336.8028981	-0.89486644	2.71E-06	4.48E-05	MYRF	29	40197141	40232303	+	6249	protein_coding	myelin regulatory factor [Source:VGNC Symbol;Acc:VGNC:31844]	NDT80_PhoG
novel.204	71.27046289	69.97484482	51.50780178	21.11877295	19.25988085	6.812743486	64.25103649	15.73046576	2.033753857	2.76E-06	4.55E-05	-	11	69930387	69933083	+	2697	-	-	-
ENSBTAG00000005865	1777.802102	1892.319732	1924.253727	1355.624092	1371.506252	1271.063285	1864.791854	1332.73121	0.484723374	2.78E-06	4.59E-05	MAPK6	10	58334675	58366916	-	3056	protein_coding	mitogen-activated protein kinase 6 [Source:VGNC Symbol;Acc:VGNC:31221]	Pkinase
ENSBTAG00000020417	2097.529317	2154.22558	1896.070213	1421.997379	1516.462197	1284.688772	2049.275037	1407.716116	0.541832512	2.83E-06	4.66E-05	DAPK3	7	20040198	20053609	+	3205	protein_coding	Bos taurus death associated protein kinase 3 (DAPK3), mRNA. [Source:RefSeq mRNA;Acc:NM_001101124]	Pkinase
ENSBTAG00000020070	1573.889389	1591.427899	1515.106849	2221.493783	2266.583873	2037.983551	1560.141379	2175.353736	-0.4795317	2.89E-06	4.75E-05	ABCC3	19	36047549	36095574	-	5111	protein_coding	Bos taurus ATP binding cassette subfamily C member 3 (ABCC3), mRNA. [Source:RefSeq mRNA;Acc:NM_001192756]	ABC_membrane
ENSBTAG00000050252	177.1862897	113.959033	163.2700132	58.32803958	72.98481164	31.14397022	151.4717786	54.15227381	1.486013098	2.90E-06	4.75E-05	-	29	46603761	46624255	+	802	lncRNA	-	-
ENSBTAG00000015878	707.7552912	766.7243711	752.208275	430.4207058	458.1824286	539.1799844	742.2293124	475.9277063	0.640783448	2.92E-06	4.79E-05	RHNO1	5	106876984	106886490	-	1620	protein_coding	Bos taurus RAD9-HUS1-RAD1 interacting nuclear orphan 1 (RHNO1), mRNA. [Source:RefSeq mRNA;Acc:NM_001075631]	-
ENSBTAG00000047807	212.8215211	224.9191441	271.1448433	130.7352611	126.7097424	123.6026318	236.2951695	127.0158785	0.895954446	2.93E-06	4.80E-05	SAPCD2	11	106094744	106102179	-	3792	protein_coding	suppressor APC domain containing 2 [Source:VGNC Symbol;Acc:VGNC:34285]	-
ENSBTAG00000005830	317.7474804	319.8850049	239.0739479	168.9501836	161.1747924	139.1746169	292.2354777	156.4331976	0.901726976	2.93E-06	4.80E-05	STRN4	18	53825011	53849753	-	4721	protein_coding	striatin 4 [Source:VGNC Symbol;Acc:VGNC:35426]	WD40
ENSBTAG00000001545	2243.039846	2290.176707	2321.738461	3549.965167	3597.543007	2887.629989	2284.985005	3345.046054	-0.549762677	2.95E-06	4.83E-05	SLC34A2	6	45178485	45205946	+	4540	protein_coding	Bos taurus solute carrier family 34 member 2 (SLC34A2), mRNA. [Source:RefSeq mRNA;Acc:NM_174661]	Na_Pi_cotrans
ENSBTAG00000006612	841.3874091	822.704247	598.656715	437.4602968	466.2918522	300.7339624	754.249457	401.4953705	0.9099533	2.98E-06	4.87E-05	SCAF1	18	56050468	56060969	+	3765	protein_coding	SR-related CTD associated factor 1 [Source:VGNC Symbol;Acc:VGNC:34313]	-
ENSBTAG00000000545	2058.924483	1943.301405	2230.385002	3013.950597	2849.448688	2848.700026	2077.536963	2904.033104	-0.483115394	2.99E-06	4.88E-05	PPP4R3B	11	38244239	38297064	-	4278	protein_coding	Bos taurus protein phosphatase 4 regulatory subunit 3B (PPP4R3B), mRNA. [Source:RefSeq mRNA;Acc:NM_001191150]	-
ENSBTAG00000033731	481.0756245	514.8149298	547.1489132	734.128774	766.3405222	830.1814562	514.3464892	776.8835841	-0.594996054	3.01E-06	4.91E-05	PRCP	29	12744375	12830803	+	2876	protein_coding	prolylcarboxypeptidase [Source:VGNC Symbol;Acc:VGNC:33287]	Peptidase_S28
ENSBTAG00000000015	175.2065546	180.9349559	169.1010851	93.52599449	88.18998073	52.55544975	175.0808652	78.09047499	1.166222263	3.06E-06	4.98E-05	FOXRED2	5	74905031	74919112	-	2814	protein_coding	FAD dependent oxidoreductase domain containing 2 [Source:VGNC Symbol;Acc:VGNC:29107]	-
ENSBTAG00000015251	111.855032	84.96945443	74.83208938	205.1537944	171.3115718	187.8370704	90.55219194	188.1008122	-1.055074809	3.10E-06	5.04E-05	-	X	59897844	59951347	+	3391	protein_coding	-	OTU
ENSBTAG00000020664	876.032773	943.6607644	919.3656695	1224.888831	1331.972812	1486.151329	913.0197356	1347.670991	-0.561879296	3.10E-06	5.04E-05	DNAJC14	5	57438695	57446182	+	3681	protein_coding	DnaJ heat shock protein family (Hsp40) member C14 [Source:NCBI gene;Acc:281691]	DnaJ
ENSBTAG00000006927	712.7046289	722.7401829	643.3615996	376.1152897	402.430142	500.2500217	692.9354705	426.2651511	0.700484738	3.15E-06	5.11E-05	ABCF1	23	28394981	28408133	-	3535	protein_coding	Bos taurus ATP binding cassette subfamily F member 1 (ABCF1), mRNA. [Source:RefSeq mRNA;Acc:NM_001206909]	ABC_tran
ENSBTAG00000002882	1001.745951	941.6614832	849.3928067	638.5914678	547.3860873	639.4246386	930.9334135	608.4673979	0.613274232	3.15E-06	5.11E-05	LMNB1	7	27122942	27175858	-	3155	protein_coding	Bos taurus lamin B1 (LMNB1), mRNA. [Source:RefSeq mRNA;Acc:NM_001103295]	Filament
ENSBTAG00000044040	443.460658	511.8160078	326.5400264	233.3121583	186.5167409	248.1785127	427.2722307	222.6691373	0.939650444	3.17E-06	5.13E-05	PDAP1	25	36994695	37003146	+	549	protein_coding	PDGFA associated protein 1 [Source:VGNC Symbol;Acc:VGNC:32655]	-
ENSBTAG00000006671	354.3725794	316.886083	290.5817497	157.8879692	163.2021483	209.2485499	320.6134707	176.7795558	0.858085252	3.17E-06	5.13E-05	DDX27	13	77328694	77345950	+	2522	protein_coding	Bos taurus DEAD-box helicase 27 (DDX27), mRNA. [Source:RefSeq mRNA;Acc:NM_001080271]	DEAD
ENSBTAG00000012352	421.6835721	352.873146	374.1604469	589.3143309	613.2751534	580.0564453	382.9057217	594.2153099	-0.633899971	3.20E-06	5.17E-05	PARP16	10	12187382	12228909	-	3033	protein_coding	Bos taurus poly(ADP-ribose) polymerase family member 16 (PARP16), mRNA. [Source:RefSeq mRNA;Acc:NM_001083379]	-
ENSBTAG00000002655	380.1091354	388.8602091	394.5691985	216.2160088	202.7355879	266.670245	387.846181	228.5406139	0.762397074	3.31E-06	5.34E-05	ZWINT	26	2809079	2813938	+	1561	protein_coding	Bos taurus ZW10 interacting kinetochore protein (ZWINT), mRNA. [Source:RefSeq mRNA;Acc:NM_001040529]	-
ENSBTAG00000021948	714.6843639	810.7085593	836.7588176	1171.589071	1222.495595	1094.905203	787.3839136	1162.996623	-0.562567615	3.31E-06	5.34E-05	ZMYM6	3	110648270	110694255	+	5396	protein_coding	Bos taurus zinc finger MYM-type containing 6 (ZMYM6), mRNA. [Source:RefSeq mRNA;Acc:NM_001206292]	-
ENSBTAG00000001244	34220.71073	33601.92048	31210.81234	21149.94828	21626.81884	26035.38585	33011.14785	22937.38433	0.525239465	3.32E-06	5.34E-05	PLAT	27	37053715	37077724	-	2472	protein_coding	Bos taurus plasminogen activator, tissue type (PLAT), mRNA. [Source:RefSeq mRNA;Acc:NM_174146]	Trypsin
novel.1428	144.5206609	158.9428618	145.7767975	273.5383925	253.4194849	255.9645052	149.7467734	260.9741275	-0.801497547	3.32E-06	5.35E-05	-	5	78614118	78621672	+	4893	-	-	-
ENSBTAG00000040602	4094.092146	4414.413068	4569.616678	6242.105891	6460.169508	10244.4197	4359.373964	7648.898368	-0.811162538	3.40E-06	5.47E-05	-	2	130801979	130806189	-	1046	protein_coding	Bos taurus SCAN domain containing 1-like (LOC515042), mRNA. [Source:RefSeq mRNA;Acc:NM_001105370]	SCAN
ENSBTAG00000018889	801.7927075	933.664358	1023.353118	1388.810735	1324.877067	1768.393559	919.6033946	1494.02712	-0.70019979	3.41E-06	5.49E-05	ATP6V0B	3	102080670	102084006	-	1086	protein_coding	ATPase H+ transporting V0 subunit b [Source:VGNC Symbol;Acc:VGNC:26310]	-
novel.780	360.3117846	376.8645214	427.6119393	554.116376	655.8496268	637.4781404	388.2627484	615.8147144	-0.665325329	3.46E-06	5.56E-05	-	19	39322333	39324344	-	1820	-	-	-
ENSBTAG00000045914	100.9664891	98.96442339	91.35345976	171.9671512	184.489385	309.4932041	97.09479075	221.9832467	-1.193790956	3.48E-06	5.58E-05	-	7	20022563	20022973	-	411	protein_coding	H3 histone, family 3A-like [Source:NCBI gene;Acc:100297725]	Histone
ENSBTAG00000021162	3016.126395	3266.825612	3641.504401	2429.664545	2120.614249	2297.841053	3308.152136	2282.706616	0.535292539	3.52E-06	5.63E-05	CKAP2	12	21581305	21607193	-	3176	protein_coding	Bos taurus cytoskeleton associated protein 2 (CKAP2), mRNA. [Source:RefSeq mRNA;Acc:NM_001098032]	-
ENSBTAG00000014150	166.2977467	155.9439399	104.9592942	44.24885761	62.84803225	66.18093672	142.4003269	57.75927552	1.300912208	3.55E-06	5.68E-05	C11H9orf16	11	98789901	98793297	+	609	protein_coding	Bos taurus chromosome 11 C9orf16 homolog (C11H9orf16), mRNA. [Source:RefSeq mRNA;Acc:NM_001195050]	-
ENSBTAG00000008570	7001.333111	7063.460764	7624.126508	10335.12522	10999.41932	18574.45849	7229.640128	13303.00101	-0.879772945	3.56E-06	5.70E-05	RPS14	7	61760781	61778862	-	2421	protein_coding	ribosomal protein S14 [Source:NCBI gene;Acc:282050]	-
ENSBTAG00000012878	826.539396	882.6826854	829.9559003	602.387857	530.1535623	584.9226907	846.3926606	572.4880367	0.563940213	3.63E-06	5.79E-05	BMS1	28	13197801	13229985	+	4577	protein_coding	Bos taurus BMS1, ribosome biogenesis factor (BMS1), mRNA. [Source:RefSeq mRNA;Acc:NM_001206147]	-
ENSBTAG00000018402	1165.074095	1106.602189	1180.79206	835.7000153	817.0244192	762.0540213	1150.822781	804.926152	0.515898659	3.63E-06	5.80E-05	TSC22D2	1	117672585	117718237	-	4423	protein_coding	Bos taurus TSC22 domain family member 2 (TSC22D2), mRNA. [Source:RefSeq mRNA;Acc:NM_001144101]	-
ENSBTAG00000002279	1268.020319	1382.503006	1376.132968	1966.057196	1829.688681	1833.601247	1342.218764	1876.449041	-0.48336014	3.72E-06	5.93E-05	LUC7L3	19	35993171	36018642	-	2809	protein_coding	Bos taurus LUC7 like 3 pre-mRNA splicing factor (LUC7L3), mRNA. [Source:RefSeq mRNA;Acc:NM_001034684]	-
ENSBTAG00000013627	651.3328414	639.7700098	440.2459284	231.3008466	291.9392466	366.9148992	577.1162599	296.7183308	0.959222961	3.76E-06	5.99E-05	HNRNPAB	7	39280575	39286714	+	1777	protein_coding	Bos taurus heterogeneous nuclear ribonucleoprotein A/B (HNRNPAB), mRNA. [Source:RefSeq mRNA;Acc:NM_001040522]	RRM_1
ENSBTAG00000004310	645.3936361	684.7538386	670.5732684	450.5338229	360.8693464	457.4270626	666.9069144	422.9434107	0.656722381	3.78E-06	6.01E-05	UBR7	21	57831036	57847913	+	3466	protein_coding	Bos taurus ubiquitin protein ligase E3 component n-recognin 7 (putative) (UBR7), mRNA. [Source:RefSeq mRNA;Acc:NM_001082601]	zf-UBR1
ENSBTAG00000010511	524.6297962	515.8145704	517.9935537	717.0326245	782.5593693	917.7738724	519.4793068	805.788622	-0.633548169	3.82E-06	6.06E-05	KAT8	25	27217760	27228735	+	1821	protein_coding	lysine acetyltransferase 8 [Source:VGNC Symbol;Acc:VGNC:30404]	MOZ_SAS
ENSBTAG00000021874	312.7981427	344.8760209	343.0613967	189.0633007	210.8450114	132.3618734	333.5785201	177.4233952	0.911740183	3.85E-06	6.11E-05	KIF14	16	79237466	79278728	-	4866	protein_coding	kinesin family member 14 [Source:VGNC Symbol;Acc:VGNC:30583]	Kinesin
ENSBTAG00000011937	207.8721834	213.923097	189.5098367	70.39590983	59.80699843	125.5491299	203.7683724	85.2506794	1.255301544	3.91E-06	6.21E-05	RITA1	17	61195558	61199902	+	1470	protein_coding	RBPJ interacting and tubulin associated 1 [Source:VGNC Symbol;Acc:VGNC:33988]	-
ENSBTAG00000020221	145.5105284	150.9457367	147.7204881	79.44681253	73.99848958	56.44844602	148.0589177	69.96458271	1.082522938	3.92E-06	6.22E-05	WNT5A	22	45541328	45558117	+	2045	protein_coding	Wnt family member 5A [Source:VGNC Symbol;Acc:VGNC:36960]	wnt
ENSBTAG00000016185	1054.20893	1056.620157	1089.4386	773.3493523	726.8070826	598.5481777	1066.755896	699.5682042	0.60897943	3.93E-06	6.22E-05	ENAH	16	28535630	28690127	-	2701	protein_coding	ENAH, actin regulator [Source:HGNC Symbol;Acc:HGNC:18271]	-
ENSBTAG00000046552	420.6937045	417.8497876	457.7391441	644.6254029	668.0137621	993.6872998	432.0942121	768.7754883	-0.831439301	3.97E-06	6.28E-05	GGACT	12	77176134	77220409	-	1688	protein_coding	Bos taurus gamma-glutamylamine cyclotransferase (GGACT), mRNA. [Source:RefSeq mRNA;Acc:NM_001075571]	-
ENSBTAG00000015271	2325.198852	2327.163411	2692.011527	1669.388719	1673.582278	1807.323522	2448.124596	1716.76484	0.511975664	3.99E-06	6.31E-05	RIPK2	14	73895603	73936735	-	4203	protein_coding	receptor interacting serine/threonine kinase 2 [Source:VGNC Symbol;Acc:VGNC:33982]	Pkinase_Tyr
ENSBTAG00000025099	1554.092038	1502.459882	1547.177744	2086.735899	2030.396913	2224.847373	1534.576555	2113.993395	-0.462179357	4.03E-06	6.35E-05	RNF145	7	70734078	70796882	-	3841	protein_coding	Bos taurus ring finger protein 145 (RNF145), mRNA. [Source:RefSeq mRNA;Acc:NM_001102168]	-
novel.1217	631.5354906	565.7966024	690.9820201	914.141172	920.419569	1041.376504	629.4380377	958.6457484	-0.606896719	4.04E-06	6.38E-05	-	28	29669032	29679165	-	5163	-	PF13804:Retro-transcribing viruses envelope glycoprotein	-
ENSBTAG00000013697	321.7069505	250.9098007	172.016621	117.661735	113.5319292	111.923643	248.2111241	114.3724357	1.117614749	4.10E-06	6.45E-05	CLASRP	18	52724338	52749212	+	2871	protein_coding	Bos taurus CLK4 associating serine/arginine rich protein (CLASRP), mRNA. [Source:RefSeq mRNA;Acc:NM_001077887]	-
ENSBTAG00000012397	1515.487204	1557.440118	1847.477947	1150.470298	1036.992532	1133.835166	1640.135089	1107.099332	0.567054626	4.24E-06	6.66E-05	DCK	6	86319005	86345274	+	2969	protein_coding	Bos taurus deoxycytidine kinase (DCK), mRNA. [Source:RefSeq mRNA;Acc:NM_001034573]	-
ENSBTAG00000015537	322.6968181	313.8871611	331.3992529	166.9388719	189.5577747	89.53891438	322.6610774	148.6785203	1.118951132	4.24E-06	6.66E-05	RASAL2	16	59629859	59878925	+	6208	protein_coding	RAS protein activator like 2 [Source:VGNC Symbol;Acc:VGNC:33738]	C2
ENSBTAG00000021347	506.8121805	474.8293041	488.8381942	700.9421308	706.5335238	820.4489655	490.159893	742.64154	-0.599599638	4.24E-06	6.66E-05	CWH43	6	67633860	67686288	+	2618	protein_coding	Bos taurus cell wall biogenesis 43 C-terminal homolog (CWH43), mRNA. [Source:RefSeq mRNA;Acc:NM_001205454]	-
ENSBTAG00000015913	2054.965013	1981.287749	1991.311054	1505.466815	1479.969792	1334.324474	2009.187939	1439.92036	0.480731605	4.27E-06	6.70E-05	MFHAS1	27	24865164	24975150	-	3590	protein_coding	malignant fibrous histiocytoma amplified sequence 1 [Source:NCBI gene;Acc:782395]	-
ENSBTAG00000003764	1090.834029	1088.608657	1004.888057	789.439846	646.7265254	697.8195827	1061.443581	711.3286514	0.577383787	4.32E-06	6.78E-05	AKIRIN2	9	62239189	62262030	+	1955	protein_coding	Bos taurus akirin 2 (AKIRIN2), mRNA. [Source:RefSeq mRNA;Acc:NM_001110087]	-
ENSBTAG00000015066	1440.257271	1452.47785	1537.459291	1967.062852	2025.328523	2255.991343	1476.731471	2082.794239	-0.49615939	4.33E-06	6.78E-05	LANCL1	2	98188212	98237653	-	4568	protein_coding	Bos taurus LanC like 1 (LANCL1), mRNA. [Source:RefSeq mRNA;Acc:NM_001076227]	-
ENSBTAG00000046135	61.37178749	59.97843842	53.45149241	8.045246838	16.21884703	21.41147953	58.26723944	15.22519113	1.933440459	4.37E-06	6.83E-05	-	14	66865293	66869643	+	981	protein_coding	-	RRM_1
ENSBTAG00000017225	527.5993989	529.8095394	512.1624818	759.2701704	737.9575399	794.1712406	523.1904734	763.7996503	-0.546001548	4.41E-06	6.89E-05	RNF135	19	17990883	18003360	-	2014	protein_coding	ring finger protein 135 [Source:VGNC Symbol;Acc:VGNC:57150]	SPRY
ENSBTAG00000025898	732.5019797	758.727246	738.6024406	505.844895	516.9757491	509.9825124	743.2772221	510.9343855	0.540755318	4.42E-06	6.91E-05	TBC1D8	11	5978170	6119371	-	4100	protein_coding	Bos taurus TBC1 domain family member 8 (TBC1D8), mRNA. [Source:RefSeq mRNA;Acc:NM_001206142]	TBC
ENSBTAG00000016277	427.6227773	407.8533812	428.5837846	607.4161363	616.3161872	719.2310623	421.3533144	647.6544619	-0.620372658	4.46E-06	6.96E-05	2-Mar	16	24225168	24268400	+	1949	protein_coding	Bos taurus mitochondrial amidoxime reducing component 2 (MARC2), mRNA. [Source:RefSeq mRNA;Acc:NM_001076380]	MOSC_N
ENSBTAG00000003758	5145.331473	5281.101503	4992.369391	6793.205299	6849.421837	8127.602978	5139.600789	7256.743371	-0.497708674	4.47E-06	6.97E-05	TKT	22	47707405	47731710	+	2872	protein_coding	transketolase [Source:HGNC Symbol;Acc:HGNC:11834]	-
ENSBTAG00000040361	1987.65402	1880.324044	1786.251692	2503.077423	2590.960813	2763.054108	1884.743252	2619.030781	-0.47474009	4.48E-06	6.97E-05	LFNG	25	40757153	40766255	-	2969	protein_coding	LFNG O-fucosylpeptide 3-beta-N-acetylglucosaminyltransferase [Source:VGNC Symbol;Acc:VGNC:30849]	Fringe
ENSBTAG00000011112	1247.233101	1307.529958	1305.18826	1716.654544	1787.114207	1802.457276	1286.650439	1768.742009	-0.459118774	4.53E-06	7.04E-05	KCNK5	23	13060754	13101280	-	3575	protein_coding	Bos taurus potassium two pore domain channel subfamily K member 5 (KCNK5), mRNA. [Source:RefSeq mRNA;Acc:NM_001191144]	Ion_trans_2
ENSBTAG00000019334	165.3078792	189.9317217	155.4952506	88.49771522	92.24469249	69.10068393	170.2449505	83.28103055	1.032258228	4.55E-06	7.07E-05	KLC2	29	44313580	44323524	+	3221	protein_coding	kinesin light chain 2 [Source:VGNC Symbol;Acc:VGNC:30623]	-
ENSBTAG00000017969	231.6290044	232.9162692	186.5943008	60.33935129	99.34043807	124.5758809	217.0465248	94.75189008	1.194659964	4.58E-06	7.11E-05	CA4	19	12803073	12811847	-	3159	protein_coding	carbonic anhydrase 4 [Source:VGNC Symbol;Acc:VGNC:26654]	-
ENSBTAG00000009664	387.0382082	401.8555374	287.6662137	705.9704101	567.6596461	578.1099472	358.8533198	617.2466678	-0.782693842	4.63E-06	7.17E-05	SP140L	2	118237531	118282557	+	1504	protein_coding	-	Sp100
ENSBTAG00000004895	703.795821	708.745214	675.432495	951.3504386	997.4590924	1049.162497	695.9911767	999.3240093	-0.522020913	4.63E-06	7.17E-05	AFAP1L2	26	34756223	34799268	-	3636	protein_coding	Bos taurus actin filament associated protein 1 like 2 (AFAP1L2), mRNA. [Source:RefSeq mRNA;Acc:NM_001076375]	PH
ENSBTAG00000014230	934.4349578	937.6629206	1034.043417	497.7996481	477.4423095	722.1508095	968.7137651	565.797589	0.77540882	4.64E-06	7.18E-05	VRK1	21	61642000	61722292	+	1710	protein_coding	Bos taurus vaccinia related kinase 1 (VRK1), mRNA. [Source:RefSeq mRNA;Acc:NM_001038224]	Pkinase
ENSBTAG00000045887	93.04754877	69.97484482	76.77578001	146.8257548	242.2690275	158.6395983	79.93272453	182.5781269	-1.191199039	4.68E-06	7.24E-05	DMTN	8	69370989	69394273	+	2235	protein_coding	dematin actin binding protein [Source:VGNC Symbol;Acc:VGNC:56943]	-
ENSBTAG00000016733	672.1200597	705.7462921	696.813092	461.5960373	483.5243771	369.8346464	691.5598146	438.3183536	0.658294415	4.68E-06	7.24E-05	NOL9	16	46832476	46851187	+	5478	protein_coding	nucleolar protein 9 [Source:VGNC Symbol;Acc:VGNC:32160]	-
novel.1724	922.5565474	963.6535772	972.8171619	1482.33673	1347.177982	1273.983032	953.0090955	1367.832581	-0.521235153	4.71E-06	7.27E-05	-	9	26107090	26117012	+	9890	-	-	-
ENSBTAG00000017642	2081.691437	1983.28703	2263.427742	3318.664321	2984.267854	2784.465587	2109.468736	3029.132587	-0.521936552	4.73E-06	7.29E-05	BMP3	6	95815372	95844458	+	3228	protein_coding	bone morphogenetic protein 3 [Source:VGNC Symbol;Acc:VGNC:26518]	TGFb_propeptide
ENSBTAG00000026624	274.1933086	254.9083633	273.088534	413.3245563	404.4574978	522.6347503	267.3967353	446.8056015	-0.740959767	4.75E-06	7.31E-05	ETFRF1	5	84792354	84799340	-	1399	protein_coding	Bos taurus electron transfer flavoprotein regulatory factor 1 (ETFRF1), mRNA. [Source:RefSeq mRNA;Acc:NM_001114860]	-
ENSBTAG00000054574	35.63523144	50.98167266	70.94470811	15.08483782	8.109423516	12.6522379	52.5205374	11.94883308	2.135547289	4.75E-06	7.31E-05	-	1	22807642	22906567	-	4124	protein_coding	multidrug resistance-associated protein 1 [Source:NCBI gene;Acc:518080]	ABC_membrane
ENSBTAG00000020914	1366.017205	1552.441914	1651.165193	2168.194023	2120.614249	2246.258852	1523.208104	2178.355708	-0.51611108	4.80E-06	7.38E-05	CPNE8	5	42193677	42472416	+	3548	protein_coding	Bos taurus copine 8 (CPNE8), mRNA. [Source:RefSeq mRNA;Acc:NM_001098085]	C2
ENSBTAG00000048655	689.9376754	689.7520418	652.1082074	419.3584914	492.6474786	426.2830924	677.2659749	446.0963541	0.602507366	4.89E-06	7.51E-05	NT5E	9	63953759	64026731	-	3551	protein_coding	Bos taurus 5'-nucleotidase ecto (NT5E), mRNA. [Source:RefSeq mRNA;Acc:NM_174129]	Metallophos
ENSBTAG00000002676	1140.327406	1113.599673	1108.875506	665.7441759	611.2477975	850.6196866	1120.934195	709.2038867	0.660089812	4.91E-06	7.53E-05	SAE1	18	54170188	54232475	+	2128	protein_coding	Bos taurus SUMO1 activating enzyme subunit 1 (SAE1), mRNA. [Source:RefSeq mRNA;Acc:NM_001081711]	-
ENSBTAG00000015818	134.6219855	121.9561581	133.1428084	42.2375459	63.86171019	65.20768765	129.906984	57.10231458	1.185367929	5.08E-06	7.78E-05	-	15	5868388	5877633	-	2024	protein_coding	interstitial collagenase-like [Source:NCBI gene;Acc:112441463]	Hemopexin
ENSBTAG00000025477	1051.239328	1009.637047	1000.028831	744.1853325	717.6839811	637.4781404	1020.301735	699.7824847	0.544208197	5.08E-06	7.78E-05	KIF3A	7	21600405	21687757	+	2109	protein_coding	kinesin family member 3A [Source:VGNC Symbol;Acc:VGNC:30602]	Kinesin
ENSBTAG00000016739	751.3094629	714.7430578	719.1655343	980.5144584	1072.47126	1077.38672	728.4060183	1043.457479	-0.518602415	5.10E-06	7.81E-05	RASAL1	17	61125494	61163613	-	2926	protein_coding	RAS protein activator like 1 [Source:VGNC Symbol;Acc:VGNC:50255]	C2
novel.1427	8.908807861	7.997125122	10.69029848	48.27148103	31.42401612	47.6892044	9.198743822	42.46156718	-2.206148102	5.31E-06	8.12E-05	-	5	76022606	76024451	+	1749	-	-	-
ENSBTAG00000003506	638.4645634	702.7473701	690.0101748	964.4239647	1012.664262	945.9980954	677.0740361	974.3621072	-0.525080063	5.42E-06	8.27E-05	STEAP2	4	74405139	74430946	+	2626	protein_coding	STEAP2 metalloreductase [Source:VGNC Symbol;Acc:VGNC:35379]	F420_oxidored
ENSBTAG00000014038	127.6929127	119.9568768	104.9592942	241.3574051	226.0501805	192.7033157	117.5363612	220.0369671	-0.90457605	5.46E-06	8.33E-05	CDKL2	6	90413362	90454715	-	2345	protein_coding	Bos taurus cyclin dependent kinase like 2 (CDKL2), mRNA. [Source:RefSeq mRNA;Acc:NM_001103274]	Pkinase
ENSBTAG00000007247	632.5253581	553.8009147	679.3198763	354.9965167	366.9514141	437.9620812	621.8820497	386.6366707	0.685447908	5.48E-06	8.35E-05	NUF2	3	5960360	5998691	-	1888	protein_coding	Bos taurus NDC80 kinetochore complex component NUF2 (NUF2), mRNA. [Source:RefSeq mRNA;Acc:NM_001099011]	-
ENSBTAG00000000668	332.5954935	349.8742241	369.3012203	528.9749796	536.23563	531.3939919	350.5903126	532.2015338	-0.602075544	5.50E-06	8.38E-05	SLC22A5	7	22033885	22060149	-	4025	protein_coding	Bos taurus solute carrier family 22 member 5 (SLC22A5), mRNA. [Source:RefSeq mRNA;Acc:NM_001046502]	Sugar_tr
ENSBTAG00000030744	568.183968	534.8077426	630.7276104	345.945614	385.197617	385.4066315	577.9064403	372.1832875	0.634890486	5.51E-06	8.38E-05	NFYB	5	67769135	67787287	-	1533	protein_coding	Bos taurus nuclear transcription factor Y subunit beta (NFYB), mRNA. [Source:RefSeq mRNA;Acc:NM_001079786]	-
ENSBTAG00000050793	96.01715139	125.9547207	115.6495927	35.19795492	59.80699843	36.98346464	112.5404882	43.99613933	1.356183198	5.56E-06	8.45E-05	RF02166	14	12535212	12535298	-	87	misc_RNA	-	-
ENSBTAG00000040584	2657.794345	2626.055962	2650.222178	1815.208818	2027.355879	1543.573024	2644.690828	1795.37924	0.558947956	5.63E-06	8.54E-05	DSC2	24	26027840	26063705	+	2943	protein_coding	Bos taurus desmocollin 2 (DSC2), mRNA. [Source:RefSeq mRNA;Acc:NM_001166526]	Cadherin
ENSBTAG00000011930	423.6633072	441.841163	432.4711659	273.5383925	294.9802804	231.6332785	432.6585453	266.7173171	0.69842225	5.63E-06	8.54E-05	DDX54	17	61176579	61194317	-	2909	protein_coding	DEAD-box helicase 54 [Source:VGNC Symbol;Acc:VGNC:27976]	DEAD
ENSBTAG00000054239	873.0631704	869.6873571	764.8422641	553.1107201	529.1398844	346.4766687	835.8642639	476.2424244	0.811940551	5.79E-06	8.77E-05	-	16	43256961	43342545	-	3975	protein_coding	kinesin family member 1B [Source:NCBI gene;Acc:100337161]	Kinesin
ENSBTAG00000011880	265.2845007	223.9195034	255.5953183	127.7182936	157.1200806	124.5758809	248.2664408	136.4714184	0.863919194	5.88E-06	8.90E-05	CHAF1B	1	148657613	148683915	+	2647	protein_coding	chromatin assembly factor 1 subunit B [Source:VGNC Symbol;Acc:VGNC:27267]	WD40
ENSBTAG00000033748	75.22993305	41.98490689	41.78934861	14.07918197	14.19149115	9.732490694	53.00139618	12.66772127	2.066535252	5.90E-06	8.92E-05	IL18RAP	11	7203304	7233720	+	2553	protein_coding	interleukin 18 receptor accessory protein [Source:VGNC Symbol;Acc:VGNC:30128]	TIR
ENSBTAG00000007093	80.17927075	86.96873571	88.43792381	37.20926663	34.46504994	27.25097394	85.19531009	32.97509684	1.370612204	5.90E-06	8.92E-05	-	5	106982821	106999621	+	1851	protein_coding	-	-
ENSBTAG00000014226	3409.103808	3733.657792	4365.529162	5709.108288	5642.131411	9448.301966	3836.096921	6933.180555	-0.853900876	5.93E-06	8.95E-05	RPL34	6	16671257	16675901	-	1398	protein_coding	ribosomal protein L34 [Source:VGNC Symbol;Acc:VGNC:34116]	-
ENSBTAG00000009351	1843.13336	1857.33231	2125.425707	2803.768523	2670.027693	3732.410181	1941.963792	3068.735466	-0.660176712	5.99E-06	9.03E-05	ATXN10	5	116028707	116169393	+	1760	protein_coding	Bos taurus ataxin 10 (ATXN10), mRNA. [Source:RefSeq mRNA;Acc:NM_001077051]	-
ENSBTAG00000016388	675.0896623	619.777197	618.0936213	452.5451347	406.4848537	412.6576054	637.6534936	423.8958646	0.589092777	6.05E-06	9.12E-05	SLCO4A1	13	54671725	54695783	-	3330	protein_coding	solute carrier organic anion transporter family member 4A1 [Source:VGNC Symbol;Acc:VGNC:34954]	-
ENSBTAG00000004037	5150.280811	4864.251356	4485.066136	3423.25253	3350.20559	3703.212709	4833.199434	3492.22361	0.468774518	6.12E-06	9.21E-05	JUN	3	87265962	87268007	+	1950	protein_coding	Bos taurus Jun proto-oncogene, AP-1 transcription factor subunit (JUN), mRNA. [Source:RefSeq mRNA;Acc:NM_001077827]	Jun
ENSBTAG00000020250	35.63523144	35.98706305	49.56411114	104.5882089	112.5182513	85.64591811	40.39546855	100.9174594	-1.319502038	6.21E-06	9.33E-05	SLC28A1	21	22524664	22586295	+	2824	protein_coding	Bos taurus solute carrier family 28 member 1 (SLC28A1), mRNA. [Source:RefSeq mRNA;Acc:NM_001037458]	-
ENSBTAG00000051116	85.12860845	99.96406403	103.0156036	43.24320176	33.451372	40.87646091	96.03609201	39.19034489	1.292694208	6.21E-06	9.33E-05	C6orf132	23	15831094	15865906	-	5864	protein_coding	chromosome 23 C6orf132 homolog [Source:NCBI gene;Acc:100295626]	-
ENSBTAG00000002415	3338.823213	3482.747991	3592.912135	4798.989739	4686.233114	6313.466713	3471.494446	5266.229855	-0.601259855	6.27E-06	9.41E-05	TSPAN3	21	32177531	32204399	-	1697	protein_coding	Bos taurus tetraspanin 3 (TSPAN3), mRNA. [Source:RefSeq mRNA;Acc:NM_001035487]	Tetraspannin
ENSBTAG00000011668	67.31099273	77.97196994	79.69131596	145.8200989	138.8738777	180.0510778	74.99142621	154.9150182	-1.047100844	6.28E-06	9.42E-05	KCTD14	29	18019943	18026164	+	732	protein_coding	potassium channel tetramerization domain containing 14 [Source:NCBI gene;Acc:112444857]	K_tetra
ENSBTAG00000000687	869.1037002	851.6938255	899.9287631	1188.68522	1210.33146	1398.558913	873.5754296	1265.858531	-0.53521314	6.29E-06	9.42E-05	POC1B	5	19295432	19400057	-	2879	protein_coding	Bos taurus POC1 centriolar protein B (POC1B), mRNA. [Source:RefSeq mRNA;Acc:NM_001099031]	WD40
ENSBTAG00000017094	493.9439025	556.7998366	521.880935	739.1570533	787.627759	1019.965025	524.2082247	848.9166123	-0.69575935	6.36E-06	9.51E-05	SHMT1	19	34334364	34350038	+	3152	protein_coding	serine hydroxymethyltransferase 1 [Source:VGNC Symbol;Acc:VGNC:34603]	SHMT
ENSBTAG00000001662	4041.629166	4183.49608	4252.795105	5518.033675	5491.093398	5423.917064	4159.306784	5477.681379	-0.39720978	6.43E-06	9.61E-05	EHD3	11	68659832	68688786	-	3464	protein_coding	Bos taurus EH domain containing 3 (EHD3), mRNA. [Source:RefSeq mRNA;Acc:NM_001098004]	-
ENSBTAG00000006015	728.5425095	680.755276	621.0091573	418.3528356	426.7584125	480.7850403	676.7689809	441.9654295	0.614397966	6.45E-06	9.62E-05	POLH	23	17114387	17143658	+	3581	protein_coding	Bos taurus DNA polymerase eta (POLH), mRNA. [Source:RefSeq mRNA;Acc:NM_001034450]	IMS
ENSBTAG00000016991	220.7404614	192.9306436	165.2137038	89.50337108	111.5045733	92.45866159	192.9616029	97.822202	0.980264169	6.45E-06	9.62E-05	EFNB2	12	82241704	82289618	-	2717	protein_coding	ephrin B2 [Source:VGNC Symbol;Acc:VGNC:28360]	-
ENSBTAG00000010452	1903.51528	1897.317935	1740.574962	1220.866208	1112.0047	633.5851442	1847.136059	988.8186838	0.901711847	6.50E-06	9.69E-05	PODXL	4	95248660	95294639	-	2143	protein_coding	podocalyxin like [Source:VGNC Symbol;Acc:VGNC:53665]	-
ENSBTAG00000023814	1297.716345	1349.514864	1502.472859	965.4296206	1009.623228	857.4324301	1383.23469	944.1617595	0.551162943	6.66E-06	9.91E-05	ECT2	1	94709117	94769544	-	4589	protein_coding	Bos taurus epithelial cell transforming 2 (ECT2), mRNA. [Source:RefSeq mRNA;Acc:NM_001097573]	RhoGEF
ENSBTAG00000039524	523.6399287	497.8210389	501.4721833	726.0835272	719.711337	773.7330102	507.6443836	739.8426248	-0.543511698	6.66E-06	9.91E-05	-	5	74501674	74571162	-	1008	protein_coding	-	-
ENSBTAG00000011154	2584.544147	2635.052728	2702.701825	1953.989326	2018.232777	1929.952905	2640.766233	1967.391669	0.424716179	6.73E-06	0.000100099	SDC1	11	78628994	78653573	+	3986	protein_coding	syndecan 1 [Source:VGNC Symbol;Acc:VGNC:34378]	-
ENSBTAG00000008170	760.2182708	781.7189807	750.2645844	548.0824409	529.1398844	499.2767726	764.0672786	525.4996993	0.540118951	6.75E-06	0.000100202	POLA1	X	118341050	118636885	-	7907	protein_coding	DNA polymerase alpha 1, catalytic subunit [Source:VGNC Symbol;Acc:VGNC:33110]	DNA_pol_B
ENSBTAG00000016764	2806.274476	2801.992715	2707.561052	1950.972358	1969.576236	2168.398927	2771.942748	2029.649174	0.449574144	6.79E-06	0.000100738	UBA1	X	85564805	85586823	+	4395	protein_coding	ubiquitin like modifier activating enzyme 1 [Source:VGNC Symbol;Acc:VGNC:36561]	-
ENSBTAG00000019494	3689.236322	3920.590591	4830.071223	5931.358232	6139.847279	8784.5461	4146.632712	6951.917204	-0.745483522	6.80E-06	0.000100738	RPL10A	23	9425849	9428501	+	875	protein_coding	ribosomal protein L10a [Source:VGNC Symbol;Acc:VGNC:54233]	-
ENSBTAG00000025644	11769.52505	11713.78902	11336.57562	7717.40303	7770.855084	9321.779586	11606.6299	8270.012567	0.488953722	6.80E-06	0.000100738	CALM1	10	102005601	102013441	+	2487	protein_coding	Bos taurus calmodulin 1 (CALM1), mRNA. [Source:RefSeq mRNA;Acc:NM_001242572]	-
ENSBTAG00000049392	225.6897991	212.9234564	232.2710307	143.8087872	109.4772175	105.1108995	223.6280954	119.4656347	0.905017148	6.86E-06	0.000101506	-	NKLS02001967.1	68799	76789	-	1660	protein_coding	-	-
ENSBTAG00000019341	447.4201281	588.7883371	559.7829023	342.9286465	320.3222289	320.1989438	531.9971225	327.8166064	0.698570766	6.88E-06	0.000101633	NSRP1	19	21237162	21283030	+	2589	protein_coding	nuclear speckle splicing regulatory protein 1 [Source:VGNC Symbol;Acc:VGNC:32284]	-
ENSBTAG00000007870	559.2751601	586.7890559	684.1791029	915.1468279	863.6536044	994.6605489	610.0811063	924.4869937	-0.599621515	6.89E-06	0.000101689	FKBP14	4	66328677	66340716	+	5169	protein_coding	Bos taurus FK506 binding protein 14 (FKBP14), mRNA. [Source:RefSeq mRNA;Acc:NM_001076391]	FKBP_C
ENSBTAG00000002191	446.4302606	455.836132	429.5556299	316.7815943	250.378451	247.2052636	443.9406742	271.455103	0.709816559	6.93E-06	0.00010219	RRP12	26	18603839	18632724	-	4419	protein_coding	Bos taurus ribosomal RNA processing 12 homolog (RRP12), mRNA. [Source:RefSeq mRNA;Acc:NM_001191473]	NUC173
ENSBTAG00000009541	2118.316536	2133.233126	2356.724893	3073.284292	3084.62197	4326.092113	2202.758185	3494.666125	-0.665897753	6.94E-06	0.000102318	SUCLG2	22	33859633	34134874	+	2371	protein_coding	Bos taurus succinate-CoA ligase GDP-forming beta subunit (SUCLG2), mRNA. [Source:RefSeq mRNA;Acc:NM_001034639]	-
ENSBTAG00000019918	800.8028399	837.6988566	828.0122097	563.1672787	601.1110181	506.0895161	822.1713021	556.789271	0.562572225	7.07E-06	0.00010407	PSME3	19	42859304	42866438	+	3564	protein_coding	proteasome activator subunit 3 [Source:VGNC Symbol;Acc:VGNC:33475]	-
ENSBTAG00000012191	2854.777986	2841.97834	2517.07937	1985.164657	1902.673492	1456.953857	2737.945232	1781.597336	0.620024451	7.17E-06	0.000105531	WWC2	27	14019529	14170149	+	5263	protein_coding	WW and C2 domain containing 2 [Source:VGNC Symbol;Acc:VGNC:36975]	WW
ENSBTAG00000014900	578.0826434	541.805227	498.5566474	338.9060231	371.0061258	341.6104234	539.4815059	350.5075241	0.622157124	7.33E-06	0.000107695	CNOT3	18	63241718	63257591	-	3156	protein_coding	CCR4-NOT transcription complex subunit 3 [Source:VGNC Symbol;Acc:VGNC:27518]	-
ENSBTAG00000015939	889.8909185	868.6877164	806.6316127	595.348266	607.1930857	496.3570254	855.0700826	566.2994591	0.594724006	7.38E-06	0.00010834	NECTIN1	15	30211169	30282341	-	5311	protein_coding	nectin cell adhesion molecule 1 [Source:VGNC Symbol;Acc:VGNC:54888]	V-set
ENSBTAG00000015857	679.0491325	637.7707285	624.8965385	896.0393666	979.2128895	1331.404727	647.2387999	1068.885661	-0.723966228	7.40E-06	0.000108598	TPRG1L	16	49419764	49422765	-	1345	protein_coding	Bos taurus tumor protein p63 regulated 1 like (TPRG1L), mRNA. [Source:RefSeq mRNA;Acc:NM_001076418]	-
ENSBTAG00000003425	343.4840364	327.88213	347.9206233	229.2895349	179.4209953	201.4625574	339.7622633	203.3910292	0.740255922	7.41E-06	0.000108601	MGME1	13	38242214	38250800	+	2606	protein_coding	Bos taurus mitochondrial genome maintenance exonuclease 1 (MGME1), mRNA. [Source:RefSeq mRNA;Acc:NM_001075245]	-
ENSBTAG00000050158	65.33125765	106.9615485	84.55054254	184.0350214	163.2021483	186.8638213	85.61444957	178.0336637	-1.056735613	7.46E-06	0.000109218	-	X	19784383	19827532	+	1973	pseudogene	-	LIM
ENSBTAG00000014680	127.6929127	131.9525645	101.0719129	59.33369543	54.73860873	36.01021557	120.23913	50.02750658	1.266314776	7.47E-06	0.000109354	ZBTB49	6	104792359	104819002	-	2859	protein_coding	Bos taurus zinc finger and BTB domain containing 49 (ZBTB49), mRNA. [Source:RefSeq mRNA;Acc:NM_001205607]	BTB
ENSBTAG00000021832	247.466885	240.9133943	325.568181	443.494232	426.7584125	533.34049	271.3161535	467.8643782	-0.786004047	7.72E-06	0.000112834	HMGCL	2	129091481	129110145	+	2103	protein_coding	3-hydroxy-3-methylglutaryl-CoA lyase [Source:VGNC Symbol;Acc:VGNC:29877]	HMGL-like
ENSBTAG00000003002	772.0966813	825.7031689	784.2791705	555.1220318	502.784258	569.3507056	794.0263402	542.4189985	0.549569898	7.73E-06	0.000112834	WDR75	2	6935086	6976756	-	3789	protein_coding	Bos taurus WD repeat domain 75 (WDR75), mRNA. [Source:RefSeq mRNA;Acc:NM_001102062]	WD40
ENSBTAG00000020164	1102.71244	1148.587096	1141.918247	785.4172226	826.1475207	818.5024673	1131.072594	810.0224035	0.481646325	7.85E-06	0.000114605	BAZ1A	21	45116769	45202855	-	4674	protein_coding	bromodomain adjacent to zinc finger domain 1A [Source:VGNC Symbol;Acc:VGNC:53933]	Bromodomain
ENSBTAG00000024443	423.6633072	411.8519438	409.1468783	651.6649939	564.6186123	673.488356	414.8873764	629.9239874	-0.602657898	7.93E-06	0.000115605	TATDN3	16	70756420	70770905	-	1427	protein_coding	Bos taurus TatD DNase domain containing 3 (TATDN3), mRNA. [Source:RefSeq mRNA;Acc:NM_001080320]	-
ENSBTAG00000038107	957.2019113	905.6744201	784.2791705	547.076785	569.687002	630.665397	882.3851673	582.4763946	0.598933752	8.13E-06	0.000118348	MAPKAPK2	16	4464620	4514607	+	1360	protein_coding	mitogen-activated protein kinase-activated protein kinase 2 [Source:VGNC Symbol;Acc:VGNC:54449]	Pkinase
ENSBTAG00000012344	3934.723472	4040.547468	2958.297144	2196.352387	2026.342201	2634.585231	3644.522695	2285.75994	0.672945018	8.13E-06	0.000118357	RPL26	19	27974414	27979325	-	521	protein_coding	ribosomal protein L26 [Source:NCBI gene;Acc:337890]	KOW
ENSBTAG00000015101	1485.791178	1661.402744	1415.006781	878.9432171	835.2706221	1161.08614	1520.733568	958.4333263	0.665731326	8.34E-06	0.000121296	HMGB2	8	5735151	5737485	-	1149	protein_coding	Bos taurus high mobility group box 2 (HMGB2), mRNA. [Source:RefSeq mRNA;Acc:NM_001037616]	HMG_box
novel.5	114.8246347	110.9601111	115.6495927	209.1764178	188.5440967	218.9810406	113.8114461	205.567185	-0.853150006	8.36E-06	0.000121461	-	1	51788493	51794233	+	1809	-	-	-
ENSBTAG00000006065	1206.648531	1233.55655	1467.486428	708.9873776	719.711337	978.1153147	1302.563837	802.2713431	0.698986484	8.41E-06	0.000122043	PCNA	13	47430406	47436478	-	1988	protein_coding	Bos taurus proliferating cell nuclear antigen (PCNA), mRNA. [Source:RefSeq mRNA;Acc:NM_001034494]	PCNA_C
ENSBTAG00000015618	2474.66885	2510.097648	2486.952165	1570.834445	1600.597466	1973.749113	2490.572888	1715.060341	0.538072908	8.43E-06	0.000122205	GDF15	7	4778258	4780515	-	1216	protein_coding	growth differentiation factor 15 [Source:VGNC Symbol;Acc:VGNC:29301]	-
ENSBTAG00000024291	1260.101379	1214.563378	1318.794095	1913.763092	1608.70689	1981.535105	1264.486284	1834.668362	-0.537016941	8.54E-06	0.0001237	FAM71F2	4	92647910	92674005	+	2087	protein_coding	Bos taurus family with sequence similarity 71 member F2 (FAM71F2), mRNA. [Source:RefSeq mRNA;Acc:NM_001046467]	-
ENSBTAG00000009362	904.7389316	971.6507024	888.2666193	630.5462209	642.6718136	662.7826162	921.5520844	645.3335503	0.513885918	8.65E-06	0.000125216	-	9	89115405	89174252	-	3659	protein_coding	-	-
ENSBTAG00000010059	400.8963537	410.8523032	496.6129568	632.5575327	673.0821518	729.936802	436.1205379	678.5254955	-0.637577839	8.79E-06	0.000127141	C8H9orf72	8	16700235	16727059	+	3225	protein_coding	Bos taurus chromosome 8 C9orf72 homolog (C8H9orf72), mRNA. [Source:RefSeq mRNA;Acc:NM_001103088]	-
ENSBTAG00000001021	37.61496652	42.98454753	30.12720481	8.045246838	9.123101455	2.919747208	36.90890629	6.696031834	2.467616256	8.81E-06	0.000127306	CYP1A1	21	33951654	33955241	+	2547	protein_coding	cytochrome P450, subfamily I (aromatic compound-inducible), polypeptide 1 [Source:NCBI gene;Acc:282870]	p450
ENSBTAG00000003390	803.7724426	742.7329957	756.0956563	547.076785	519.003105	415.5773526	767.5336982	493.8857475	0.636411788	8.87E-06	0.000128078	SF3A1	17	69345496	69364944	-	3044	protein_coding	splicing factor 3a subunit 1 [Source:VGNC Symbol;Acc:VGNC:34506]	ubiquitin
ENSBTAG00000018593	412.7747642	382.8623652	428.5837846	603.3935129	665.9864062	1208.775344	408.073638	826.0517544	-1.017615825	8.88E-06	0.0001281	PSENEN	18	46459392	46460717	+	590	protein_coding	Bos taurus presenilin enhancer, gamma-secretase subunit (PSENEN), mRNA. [Source:RefSeq mRNA;Acc:NM_001008669]	-
ENSBTAG00000003560	30.68589374	33.98778177	35.95827671	78.44115667	71.9711337	163.5058437	33.54398408	104.639378	-1.642220205	9.01E-06	0.000129763	-	12	18095424	18096263	-	840	protein_coding	-	Ribosomal_L2_C
ENSBTAG00000008490	389.0179433	375.8648808	432.4711659	600.3765453	567.6596461	686.1405939	399.1179966	618.0589284	-0.630994918	9.12E-06	0.000131229	CRYZL1	1	1909498	1943914	+	2200	protein_coding	crystallin zeta like 1 [Source:VGNC Symbol;Acc:VGNC:27747]	-
ENSBTAG00000014880	455.3390684	516.814211	448.9925363	804.5246838	726.8070826	653.0501256	473.7152719	728.1272973	-0.620138901	9.27E-06	0.00013322	-	1	144225436	144234833	-	3875	protein_coding	-	V-set
ENSBTAG00000008330	5057.233262	4780.281542	4552.123463	3085.352162	3065.362089	3806.37711	4796.546089	3319.030454	0.531150419	9.27E-06	0.00013322	RNF19B	2	120719524	120743308	+	2820	protein_coding	Bos taurus ring finger protein 19B (RNF19B), mRNA. [Source:RefSeq mRNA;Acc:NM_001205662]	IBR
novel.344	6976.586423	7109.444234	8055.625829	9949.959027	9749.554422	10618.14735	7380.552162	10105.88693	-0.453390221	9.30E-06	0.000133483	-	13	65178858	65184013	+	5156	-	-	-
ENSBTAG00000006482	651.3328414	676.7567135	662.7985059	437.4602968	458.1824286	469.1060514	663.6293536	454.916259	0.544671801	9.33E-06	0.000133826	PTCD3	11	48727826	48759022	-	2692	protein_coding	Bos taurus pentatricopeptide repeat domain 3 (PTCD3), mRNA. [Source:RefSeq mRNA;Acc:NM_001046034]	-
ENSBTAG00000020541	1293.756875	1240.554035	1403.344637	1866.497266	1827.661325	2622.906242	1312.551849	2105.688278	-0.682001286	9.37E-06	0.00013429	PYURF	6	36250083	36253466	+	1868	protein_coding	PIGY upstream reading frame [Source:NCBI gene;Acc:100996942]	-
ENSBTAG00000001576	203.9127133	227.918066	232.2710307	384.1605365	331.4726862	363.9951519	221.36727	359.8761249	-0.701067172	9.38E-06	0.00013429	TMEM140	4	98798511	98812609	+	2087	protein_coding	Bos taurus transmembrane protein 140 (TMEM140), mRNA. [Source:RefSeq mRNA;Acc:NM_001105373]	-
ENSBTAG00000010275	3186.383612	3366.789677	3258.597346	4331.359767	4293.939752	4292.028396	3270.590211	4305.775971	-0.396729642	9.46E-06	0.000135276	WASHC5	14	15092454	15141282	+	4302	protein_coding	WASH complex subunit 5 [Source:VGNC Symbol;Acc:VGNC:36869]	-
ENSBTAG00000039046	2650.865272	2733.017511	3773.675364	4505.338229	4629.46715	5597.155398	3052.519382	4910.653592	-0.685895142	9.55E-06	0.000136446	CD24	2	117785379	117787180	+	1802	protein_coding	CD24 molecule [Source:VGNC Symbol;Acc:VGNC:27014]	-
ENSBTAG00000018067	1740.187135	1740.374355	1850.393483	2389.438311	2330.445583	2481.785127	1776.984991	2400.55634	-0.433939646	9.62E-06	0.000137399	S100PBP	2	120815271	120849384	-	4473	protein_coding	S100P binding protein [Source:VGNC Symbol;Acc:VGNC:34250]	-
novel.1039	100.9664891	99.96406403	96.21268634	203.1424827	158.1337586	205.3555536	99.04774649	188.877265	-0.931694581	9.67E-06	0.000137869	-	24	19835316	19840811	+	5496	-	PF00078:Reverse transcriptase (RNA-dependent DNA polymerase)	RVT_1
ENSBTAG00000050925	498.8932402	470.8307416	450.9362269	723.0665596	651.7949151	906.0948836	473.5534029	760.3187861	-0.683400927	9.69E-06	0.00013807	ZC3H11A	16	1624495	1625414	+	920	protein_coding	-	-
ENSBTAG00000006125	105.9158268	96.96514211	128.2835818	31.1753315	59.80699843	36.98346464	110.3881836	42.65526485	1.373185339	9.77E-06	0.000139156	PLK3	3	101208672	101213711	-	2522	protein_coding	polo like kinase 3 [Source:VGNC Symbol;Acc:VGNC:33035]	Pkinase
ENSBTAG00000026461	464.2478763	453.8368507	371.2449109	289.6288862	249.3647731	203.4090555	429.776546	247.4675716	0.796666302	9.81E-06	0.000139547	CACNA1H	25	930615	988927	+	7650	protein_coding	calcium voltage-gated channel subunit alpha1 H [Source:VGNC Symbol;Acc:VGNC:26678]	Ion_trans
ENSBTAG00000038536	417.7241019	433.8440379	517.0217084	677.8120461	668.0137621	809.7432257	456.1966161	718.5230113	-0.655394099	9.94E-06	0.000141309	-	15	47778463	47795994	-	2738	protein_coding	tripartite motif-containing protein 5-like [Source:NCBI gene;Acc:616948]	zf-B_box
ENSBTAG00000006640	750.3195954	688.7524012	788.1665517	535.0089147	495.6885124	436.0155831	742.4128494	488.9043367	0.603016917	1.04E-05	0.000147069	RB1	12	18118566	18238934	+	5425	protein_coding	Bos taurus RB transcriptional corepressor 1 (RB1), mRNA. [Source:RefSeq mRNA;Acc:NM_001076907]	-
ENSBTAG00000007809	223.7100641	256.9076446	259.4826995	374.103978	401.416464	400.0053675	246.700136	391.8419365	-0.667490503	1.04E-05	0.000147662	PPP1R36	10	76687169	76710452	+	1886	protein_coding	protein phosphatase 1 regulatory subunit 36 [Source:VGNC Symbol;Acc:VGNC:33240]	-
ENSBTAG00000007728	522.6500612	421.8483502	456.7672988	316.7815943	272.6793657	284.1887283	467.0885701	291.2165627	0.681663016	1.04E-05	0.000147662	PES1	17	69555254	69569017	-	4320	protein_coding	Bos taurus pescadillo ribosomal biogenesis factor 1 (PES1), mRNA. [Source:RefSeq mRNA;Acc:NM_001354818]	-
ENSBTAG00000002051	1036.391314	1052.621594	943.6618024	1362.663683	1425.231183	1442.355121	1010.89157	1410.083329	-0.480266571	1.04E-05	0.000147837	ARAP1	15	52239474	52300725	-	4945	protein_coding	ArfGAP with RhoGAP domain, ankyrin repeat and PH domain 1 [Source:NCBI gene;Acc:511889]	RhoGAP
ENSBTAG00000006933	398.9166187	472.8300229	426.640094	284.6006069	281.8024672	228.7135313	432.7955785	265.0388685	0.707875252	1.05E-05	0.000148313	PPP1R10	23	28373727	28389370	+	3761	protein_coding	Bos taurus protein phosphatase 1 regulatory subunit 10 (PPP1R10), mRNA. [Source:RefSeq mRNA;Acc:NM_001143863]	-
ENSBTAG00000002756	921.5666798	861.6902319	906.7316803	619.4840065	608.2067637	658.88962	896.662864	628.8601301	0.511720212	1.05E-05	0.000148978	CDCA2	8	72822379	72865583	+	3366	protein_coding	Bos taurus cell division cycle associated 2 (CDCA2), mRNA. [Source:RefSeq mRNA;Acc:NM_001046194]	-
ENSBTAG00000009358	105.9158268	100.9637047	100.1000676	39.22057834	53.72493079	38.92996278	102.326533	43.95849063	1.219913776	1.07E-05	0.000150687	MTSS1L	18	1488986	1508027	+	3175	protein_coding	MTSS1L, I-BAR domain containing [Source:VGNC Symbol;Acc:VGNC:31753]	-
ENSBTAG00000005146	86.11847599	70.97448546	89.40976912	224.2612556	147.9969792	152.8001039	82.16757686	175.0194462	-1.090320016	1.07E-05	0.000150687	-	23	28525598	28527983	-	921	protein_coding	-	MHC_I
ENSBTAG00000033446	622.6266827	586.7890559	649.1926715	924.1977305	837.297978	1142.594407	619.5361367	968.0300387	-0.644022386	1.09E-05	0.000153471	TATDN1	14	15560985	15592470	+	1019	protein_coding	Bos taurus TatD DNase domain containing 1 (TATDN1), mRNA. [Source:RefSeq mRNA;Acc:NM_001075402]	-
ENSBTAG00000009286	304.8792023	295.8936295	258.5108542	179.0067422	174.3526056	141.1211151	286.4278954	164.8268209	0.79766468	1.09E-05	0.000154086	ZC3H4	18	54113875	54149783	-	4007	protein_coding	Bos taurus zinc finger CCCH-type containing 4 (ZC3H4), mRNA. [Source:RefSeq mRNA;Acc:NM_001205889]	-
novel.159	42.56430422	44.98382881	60.25440963	91.51468279	119.6139969	148.9071076	49.26751422	120.0119291	-1.284327569	1.10E-05	0.000154143	-	10	77069511	77073000	-	1100	-	PF00255:Glutathione peroxidase	GSHPx
ENSBTAG00000039888	769.1270786	714.7430578	825.0966738	1122.311934	1049.156667	1404.398407	769.6556034	1191.955669	-0.631148692	1.12E-05	0.000157399	MAGED2	X	92287353	92293899	+	2018	protein_coding	Bos taurus MAGE family member D2 (MAGED2), mRNA. [Source:RefSeq mRNA;Acc:NM_001075665]	MAGE
ENSBTAG00000003307	711.7147613	734.7358706	719.1655343	487.7430896	487.5790889	524.5812484	721.8720554	499.9678089	0.529732209	1.14E-05	0.000160542	IMMT	11	48673645	48716318	+	2760	protein_coding	Bos taurus inner membrane mitochondrial protein (IMMT), mRNA. [Source:RefSeq mRNA;Acc:NM_001046015]	-
ENSBTAG00000014482	1001.745951	1023.632016	1010.719129	1321.431793	1406.98498	1527.02779	1012.032365	1418.481521	-0.487197795	1.15E-05	0.000161158	FAF1	3	95351469	95849104	+	4007	protein_coding	Bos taurus Fas associated factor 1 (FAF1), mRNA. [Source:RefSeq mRNA;Acc:NM_001046318]	UBX
ENSBTAG00000006686	95.02728385	72.97376674	77.74762532	149.8427224	161.1747924	172.2650853	81.91622531	161.0942	-0.97586726	1.15E-05	0.000161158	NPNT	6	19173926	19254856	-	5989	protein_coding	nephronectin [Source:VGNC Symbol;Acc:VGNC:32209]	EGF_CA
ENSBTAG00000012550	930.4754877	951.6578896	751.2364297	600.3765453	587.9332049	485.6512856	877.7899356	557.9870119	0.653769121	1.15E-05	0.0001617	TAOK3	17	56979400	57072044	+	4697	protein_coding	Bos taurus TAO kinase 3 (TAOK3), mRNA. [Source:RefSeq mRNA;Acc:NM_001206058]	Pkinase
ENSBTAG00000019682	3185.393744	3082.891735	2833.900943	2125.956477	2127.709995	1448.194615	3034.062141	1900.620362	0.674895411	1.16E-05	0.00016179	PRRC2A	23	27657894	27671044	-	6757	protein_coding	Bos taurus proline rich coiled-coil 2A (PRRC2A), mRNA. [Source:RefSeq mRNA;Acc:NM_001205557]	-
ENSBTAG00000039732	590.9509214	573.7937275	666.6858872	883.9714964	872.7767059	892.4693966	610.4768454	883.0725329	-0.532455483	1.16E-05	0.000161809	BLOC1S5	23	47392832	47417441	+	1992	protein_coding	Bos taurus biogenesis of lysosomal organelles complex 1 subunit 5 (BLOC1S5), mRNA. [Source:RefSeq mRNA;Acc:NM_001098875]	-
ENSBTAG00000018897	373.1800626	343.8763803	350.8361593	217.2216646	213.8860452	238.446022	355.9642007	223.1845773	0.67319185	1.16E-05	0.000162555	PSMD11	19	17701898	17729742	-	2209	protein_coding	Bos taurus proteasome 26S subunit, non-ATPase 11 (PSMD11), mRNA. [Source:RefSeq mRNA;Acc:NM_001046148]	-
ENSBTAG00000009951	455.3390684	465.8325384	500.500338	290.634542	283.829823	336.744178	473.8906483	303.736181	0.641415448	1.16E-05	0.000162555	PGP	25	1742546	1745400	-	2756	protein_coding	Bos taurus phosphoglycolate phosphatase (PGP), mRNA. [Source:RefSeq mRNA;Acc:NM_001038172]	-
ENSBTAG00000003942	1092.813764	1039.626266	1096.241517	1440.099184	1483.010825	1485.17808	1076.227182	1469.429363	-0.449246674	1.18E-05	0.000164412	PIP4K2C	5	55886481	55898381	-	2774	protein_coding	Bos taurus phosphatidylinositol-5-phosphate 4-kinase type 2 gamma (PIP4K2C), mRNA. [Source:RefSeq mRNA;Acc:NM_001076196]	PIP5K
ENSBTAG00000008717	4307.903534	4201.489611	4210.033911	2634.81834	2737.944114	3405.398494	4239.809019	2926.053649	0.534953947	1.19E-05	0.000165656	SERPINE2	2	112087760	112158159	-	2098	protein_coding	Bos taurus serpin family E member 2 (SERPINE2), mRNA. [Source:RefSeq mRNA;Acc:NM_174669]	Serpin
ENSBTAG00000004849	235.5884745	248.9105194	236.1584119	136.7691963	153.0653689	125.5491299	240.2191353	138.4612317	0.79534162	1.19E-05	0.000165656	IGSF3	3	26574398	26704608	+	7649	protein_coding	immunoglobulin superfamily member 3 [Source:VGNC Symbol;Acc:VGNC:30094]	V-set
ENSBTAG00000051793	90.07794615	79.97125122	88.43792381	172.972807	151.038013	168.372089	86.16237373	164.1276363	-0.929646994	1.19E-05	0.000166207	-	10	69616429	69618506	+	192	protein_coding	-	-
ENSBTAG00000001822	1856.991505	1903.315779	2178.8772	2693.146379	2733.889403	3404.425245	1979.728161	2943.820342	-0.572419781	1.20E-05	0.000166207	SNX10	4	69587812	69655430	-	3284	protein_coding	Bos taurus sorting nexin 10 (SNX10), mRNA. [Source:RefSeq mRNA;Acc:NM_001075375]	PX
ENSBTAG00000018971	684.9883377	635.7714472	637.5305277	945.3165035	903.1870441	1260.357545	652.7634375	1036.287031	-0.667025539	1.20E-05	0.000166799	RAD51B	10	79669849	80286850	+	1095	protein_coding	RAD51 paralog B [Source:VGNC Symbol;Acc:VGNC:33685]	-
ENSBTAG00000006017	2130.194946	2167.220908	1838.731339	1470.26886	1289.398339	1499.776816	2045.382398	1419.814672	0.526530773	1.21E-05	0.000167257	NFKB2	26	23019572	23026090	+	3114	protein_coding	Bos taurus nuclear factor kappa B subunit 2 (NFKB2), mRNA. [Source:RefSeq mRNA;Acc:NM_001102101]	RHD
ENSBTAG00000008654	330.6157584	387.8605684	372.2167562	557.1333436	516.9757491	610.2271665	363.564361	561.4454197	-0.627160637	1.21E-05	0.000167766	HOOK2	7	12747648	12759585	+	3840	protein_coding	hook microtubule tethering protein 2 [Source:VGNC Symbol;Acc:VGNC:29906]	-
ENSBTAG00000016007	1457.085019	1488.464913	1533.57191	2074.668028	2077.026098	3017.072115	1493.040614	2389.588747	-0.678611217	1.21E-05	0.000168271	ADH5	6	25528829	25543695	+	1465	protein_coding	Bos taurus alcohol dehydrogenase 5 (class III), chi polypeptide (ADH5), mRNA. [Source:RefSeq mRNA;Acc:NM_001034249]	ADH_zinc_N
ENSBTAG00000005503	160.3585415	168.9392682	145.7767975	260.4648664	264.5699422	272.5097394	158.3582024	265.8481827	-0.747772967	1.23E-05	0.00016985	PRMT2	1	146320299	146345063	+	2763	protein_coding	Bos taurus protein arginine methyltransferase 2 (PRMT2), mRNA. [Source:RefSeq mRNA;Acc:NM_001024495]	SH3_1
novel.702	32.66562882	33.98778177	43.73303925	94.53165035	89.20365867	84.67266904	36.79548328	89.46932602	-1.280915868	1.25E-05	0.000172228	-	19	10462399	10483924	+	2199	-	-	-
ENSBTAG00000004484	866.1340976	851.6938255	921.3093601	595.348266	656.8633048	541.1264826	879.7124277	597.7793511	0.557733372	1.25E-05	0.000172228	CEP83	5	24070404	24345243	-	3312	protein_coding	centrosomal protein 83 [Source:VGNC Symbol;Acc:VGNC:27215]	-
ENSBTAG00000010513	384.0686056	396.8573342	387.7662813	240.3517493	251.392129	260.8307506	389.5640737	250.8582096	0.634812207	1.25E-05	0.000172308	GPS2	19	27020759	27024021	-	1811	protein_coding	G protein pathway suppressor 2 [Source:VGNC Symbol;Acc:VGNC:29613]	-
ENSBTAG00000020294	466.2276114	450.8379288	513.1343271	712.0043452	704.5061679	1140.647909	476.7332891	852.3861408	-0.838520687	1.25E-05	0.000172401	PTPN6	5	103502498	103518817	-	3079	protein_coding	Bos taurus protein tyrosine phosphatase, non-receptor type 6 (PTPN6), mRNA. [Source:RefSeq mRNA;Acc:NM_001098017]	Y_phosphatase
ENSBTAG00000000526	1953.998524	2053.261875	2137.087851	1565.806166	1500.24335	1412.1844	2048.116083	1492.744639	0.456425298	1.27E-05	0.000175524	TOPBP1	1	135753514	135824423	+	6168	protein_coding	Bos taurus DNA topoisomerase II binding protein 1 (TOPBP1), mRNA. [Source:RefSeq mRNA;Acc:NM_001206766]	BRCT
ENSBTAG00000005339	6986.485098	7026.474061	7053.653308	5642.735001	5151.511288	4898.362566	7022.204155	5230.869619	0.424899808	1.28E-05	0.00017656	VEGFA	23	17281915	17297193	+	2874	protein_coding	Bos taurus vascular endothelial growth factor A (VEGFA), transcript variant 4, mRNA. [Source:RefSeq mRNA;Acc:NM_001316956]	-
ENSBTAG00000002573	1798.58932	1883.322966	2039.903319	1363.669339	1417.121759	1382.986928	1907.271869	1387.926009	0.458636062	1.30E-05	0.000178583	UBA2	18	44841845	44872496	+	2685	protein_coding	Bos taurus ubiquitin like modifier activating enzyme 2 (UBA2), mRNA. [Source:RefSeq mRNA;Acc:NM_001083381]	-
ENSBTAG00000011559	5624.427363	5733.938713	6793.198763	8156.874638	9080.526982	13452.24864	6050.521613	10229.88342	-0.757672545	1.30E-05	0.000178834	RPL7A	11	104255845	104259161	+	881	protein_coding	ribosomal protein L7a [Source:VGNC Symbol;Acc:VGNC:49957]	-
ENSBTAG00000016599	914.637607	941.6614832	931.0278133	1256.064163	1324.877067	1765.473812	929.1089678	1448.805014	-0.641114429	1.31E-05	0.000179399	MRPL53	11	10159213	10162298	+	2901	protein_coding	Bos taurus mitochondrial ribosomal protein L53 (MRPL53), mRNA. [Source:RefSeq mRNA;Acc:NM_001045926]	-
ENSBTAG00000010698	261.3250306	253.9087226	273.088534	163.9219043	158.1337586	149.8803567	262.7740957	157.3120065	0.740510134	1.31E-05	0.000179406	VARS2	23	28146081	28159087	-	4203	protein_coding	valyl-tRNA synthetase 2, mitochondrial [Source:VGNC Symbol;Acc:VGNC:36766]	-
ENSBTAG00000008361	1121.519923	1058.619438	1229.384325	1612.066335	1527.612655	1970.829365	1136.507895	1703.502785	-0.583957864	1.31E-05	0.00017955	PON2	4	12645430	12673193	-	2334	protein_coding	paraoxonase 2 [Source:VGNC Symbol;Acc:VGNC:33161]	-
ENSBTAG00000011541	870.0935677	862.6898726	922.2812054	643.6197471	632.5350342	558.6449658	885.0215486	611.5999157	0.533395769	1.31E-05	0.000179612	RBL1	13	66015527	66074535	-	3800	protein_coding	Bos taurus RB transcriptional corepressor like 1 (RBL1), mRNA. [Source:RefSeq mRNA;Acc:NM_001192602]	-
ENSBTAG00000001192	1007.685156	1022.632375	1104.988125	1419.986067	1404.957624	1589.31573	1045.101885	1471.419807	-0.493610541	1.32E-05	0.00018045	STX12	2	125550304	125585869	-	2087	protein_coding	Bos taurus syntaxin 12 (STX12), mRNA. [Source:RefSeq mRNA;Acc:NM_001101053]	SNARE
ENSBTAG00000014426	491.9641674	459.8346945	423.724558	293.6515096	248.3510952	315.3326985	458.5078067	285.7784344	0.681557867	1.32E-05	0.000181016	PRKAG1	5	30799602	30814717	+	1980	protein_coding	protein kinase AMP-activated non-catalytic subunit gamma 1 [Source:VGNC Symbol;Acc:VGNC:33322]	CBS
ENSBTAG00000013162	11617.08545	11688.79801	11414.32324	6738.899883	6876.791141	9361.682798	11573.40223	7659.124608	0.595523098	1.33E-05	0.000181944	HSPA8	15	33679009	33683436	-	2317	protein_coding	Bos taurus heat shock protein family A (Hsp70) member 8 (HSPA8), mRNA. [Source:RefSeq mRNA;Acc:NM_174345]	HSP70
ENSBTAG00000040082	381.0990029	377.864162	505.3595646	648.6480263	645.7128474	939.1853519	421.4409099	744.5154086	-0.821015836	1.34E-05	0.000182306	HOXA10	4	68862439	68872086	+	2049	protein_coding	homeobox A10 [Source:VGNC Symbol;Acc:VGNC:53647]	-
novel.1235	600.8495968	516.814211	540.345996	858.8301	879.8724515	742.5890399	552.6699346	827.0971971	-0.581446441	1.34E-05	0.000182325	-	29	44832067	44850690	+	6304	-	PF15091:Domain of unknown function (DUF4554)	-
ENSBTAG00000004307	2265.806799	2383.143286	2495.698773	3154.742416	3145.442646	3251.625141	2381.54962	3183.936734	-0.418903277	1.34E-05	0.000182325	VPS36	12	21615450	21646981	+	4220	protein_coding	Bos taurus vacuolar protein sorting 36 homolog (VPS36), mRNA. [Source:RefSeq mRNA;Acc:NM_001098939]	-
ENSBTAG00000050116	10.88854294	4.998203201	7.774762532	35.19795492	36.49240582	39.90321184	7.887169558	37.19785753	-2.23703278	1.35E-05	0.000183786	-	1	58031272	58058215	-	1365	protein_coding	-	-
ENSBTAG00000031500	901.769329	875.6852009	908.675371	655.6876173	598.0699843	642.3443858	895.3766336	632.0339958	0.502446008	1.37E-05	0.000185752	SHMT2	5	56208141	56213412	-	2101	protein_coding	Bos taurus serine hydroxymethyltransferase 2 (SHMT2), mRNA. [Source:RefSeq mRNA;Acc:NM_001034282]	SHMT
ENSBTAG00000005501	651.3328414	681.7549167	693.897556	439.4716085	478.4559874	325.0651892	675.6617714	414.3309284	0.706024076	1.37E-05	0.000185837	COBLL1	2	31429997	31587069	+	4657	protein_coding	cordon-bleu WH2 repeat protein like 1 [Source:HGNC Symbol;Acc:HGNC:23571]	-
ENSBTAG00000048029	246.4770175	239.9137537	287.6662137	119.6730467	132.7918101	170.3185871	258.018995	140.9278146	0.871901556	1.37E-05	0.000186382	MMP1	15	5811583	5820952	+	2068	protein_coding	Bos taurus matrix metallopeptidase 1 (interstitial collagenase) (MMP1), mRNA. [Source:RefSeq mRNA;Acc:NM_174112]	Hemopexin
ENSBTAG00000011455	300.9197322	274.9011761	250.7360917	115.6504233	174.3526056	159.6128474	275.519	149.8719588	0.878236938	1.38E-05	0.000187925	POLA2	29	43477495	43504482	+	3094	protein_coding	Bos taurus DNA polymerase alpha 2, accessory subunit (POLA2), mRNA. [Source:RefSeq mRNA;Acc:NM_001024542]	-
ENSBTAG00000004499	249.4466201	255.9080039	208.9467431	347.9569258	414.5942772	407.7913601	238.1004557	390.1141877	-0.712685028	1.39E-05	0.000187965	RGS3	8	102734527	102832523	+	3654	protein_coding	Bos taurus regulator of G protein signaling 3 (RGS3), mRNA. [Source:RefSeq mRNA;Acc:NM_001077973]	RGS
ENSBTAG00000019184	175.2065546	163.941065	159.3826319	287.6175745	246.3237393	332.8511817	166.1767505	288.9308318	-0.798515101	1.39E-05	0.000188581	TRAPPC2L	18	14032588	14038555	+	1996	protein_coding	Bos taurus trafficking protein particle complex 2 like (TRAPPC2L), mRNA. [Source:RefSeq mRNA;Acc:NM_001098920]	-
ENSBTAG00000009749	463.2580088	444.8400849	434.4148565	690.8855722	704.5061679	602.4411739	447.5043167	665.9443047	-0.573328364	1.40E-05	0.000188921	USP2	15	29936983	29958822	-	2583	protein_coding	Bos taurus ubiquitin specific peptidase 2 (USP2), mRNA. [Source:RefSeq mRNA;Acc:NM_001046263]	UCH
ENSBTAG00000018622	692.9072781	763.7254492	571.4450461	434.4433293	439.9362257	426.2830924	676.0259245	433.5542158	0.640722528	1.40E-05	0.000189615	PCBP4	22	48966805	48976850	+	2113	protein_coding	Bos taurus poly(rC) binding protein 4 (PCBP4), mRNA. [Source:RefSeq mRNA;Acc:NM_001075283]	KH_1
novel.203	235.5884745	189.9317217	274.0603793	396.2284068	364.9240582	437.9620812	233.1935252	399.7048487	-0.777185348	1.41E-05	0.000189785	-	11	69712765	69713714	+	914	-	-	-
ENSBTAG00000010682	1842.143492	1735.376152	1702.672995	2449.777662	2502.770833	2251.125097	1760.064213	2401.224531	-0.448095856	1.41E-05	0.000189785	DDR1	23	28172747	28219346	-	4013	protein_coding	Bos taurus discoidin domain receptor tyrosine kinase 1 (DDR1), mRNA. [Source:RefSeq mRNA;Acc:NM_001076012]	Pkinase_Tyr
ENSBTAG00000048529	24.7466885	17.99353153	10.69029848	72.40722154	62.84803225	48.66245347	17.81017284	61.30590242	-1.784198727	1.41E-05	0.000190831	-	23	51776796	51803006	+	2734	lncRNA	-	-
ENSBTAG00000049289	58.40218487	65.97628226	78.71947064	26.14705222	25.34194849	19.46498139	67.69931259	23.65132737	1.518789358	1.42E-05	0.000191151	-	8	59950294	59954953	+	2074	lncRNA	-	-
ENSBTAG00000015952	191.0444352	192.9306436	147.7204881	79.44681253	106.4361836	59.36819323	177.2318556	81.75039647	1.117408144	1.43E-05	0.000192005	ADAP1	25	41771181	41804810	+	2317	protein_coding	ArfGAP with dual PH domains 1 [Source:VGNC Symbol;Acc:VGNC:25633]	PH
ENSBTAG00000039466	744.3803901	692.7509637	622.9528479	469.6412842	475.4149536	431.1493377	686.6947339	458.7351918	0.582085696	1.44E-05	0.000194112	CDR2L	19	56432269	56444629	-	2193	protein_coding	cerebellar degeneration related protein 2 like [Source:VGNC Symbol;Acc:VGNC:27154]	-
ENSBTAG00000002765	557.2954251	509.8167266	479.1197411	806.5359955	848.4484353	689.0603411	515.4106309	781.3482573	-0.600114392	1.48E-05	0.000198975	CYP24A1	13	81592182	81610449	-	1344	protein_coding	Bos taurus cytochrome P450, family 24, subfamily A, polypeptide 1 (CYP24A1), mRNA. [Source:RefSeq mRNA;Acc:NM_001191417]	p450
ENSBTAG00000011126	1018.573699	1018.633812	1181.763905	1426.020002	1555.995637	1624.352697	1072.990472	1535.456112	-0.516984769	1.50E-05	0.000201153	STK38	23	10417325	10458886	-	3570	protein_coding	Bos taurus serine/threonine kinase 38 (STK38), mRNA. [Source:RefSeq mRNA;Acc:NM_001081602]	Pkinase
ENSBTAG00000014549	557.2954251	540.8055864	580.191654	316.7815943	340.5957877	413.6308545	559.4308885	357.0027455	0.647632868	1.50E-05	0.000201767	GNL3	22	48169659	48175878	-	1660	protein_coding	G protein nucleolar 3 [Source:VGNC Symbol;Acc:VGNC:29473]	-
ENSBTAG00000043959	130.6625153	107.9611892	95.24084102	194.09158	193.6124864	257.9110034	111.2881818	215.2050233	-0.952175846	1.51E-05	0.000202253	PDGFC	17	42227069	42478276	+	1263	protein_coding	platelet derived growth factor C [Source:VGNC Symbol;Acc:VGNC:53915]	CUB
ENSBTAG00000014132	157.3889389	165.9403463	201.1719805	465.6186608	544.3450535	214.1147953	174.8337552	408.0261698	-1.222147168	1.52E-05	0.000203356	SNED1	3	120284114	120324147	+	4087	protein_coding	sushi, nidogen and EGF like domains 1 [Source:HGNC Symbol;Acc:HGNC:24696]	fn3
ENSBTAG00000000218	289.0413217	304.8903953	301.2720481	428.4093941	449.0593272	500.2500217	298.401255	459.239581	-0.622221745	1.54E-05	0.000206482	MAP2K5	10	14382469	14672701	+	2590	protein_coding	mitogen-activated protein kinase kinase 5 [Source:VGNC Symbol;Acc:VGNC:31186]	Pkinase
ENSBTAG00000017798	604.809067	568.7955243	608.3751682	291.6401979	385.197617	420.443598	593.9932532	365.760471	0.69928484	1.56E-05	0.000208942	ERH	10	81172307	81184975	-	727	protein_coding	ERH, mRNA splicing and mitosis factor [Source:VGNC Symbol;Acc:VGNC:28581]	-
ENSBTAG00000039766	835.4482038	789.7161058	669.6014231	495.7883364	514.9483932	340.6371743	764.9219109	450.457968	0.764267039	1.57E-05	0.000209291	FBRSL1	17	44624122	44706739	-	6071	protein_coding	fibrosin like 1 [Source:VGNC Symbol;Acc:VGNC:28889]	-
ENSBTAG00000008537	114.8246347	110.9601111	96.21268634	48.27148103	53.72493079	43.79620812	107.3324774	48.59753998	1.1436266	1.57E-05	0.0002095	FAM219A	8	75767849	75827099	-	1460	protein_coding	family with sequence similarity 219 member A [Source:VGNC Symbol;Acc:VGNC:28798]	-
ENSBTAG00000001343	605.7989345	696.7495263	755.123811	459.5847256	474.4012757	401.9518657	685.8907573	445.3126223	0.623498003	1.58E-05	0.000210827	DEPDC1	3	76768174	76788676	+	2587	protein_coding	DEP domain containing 1 [Source:VGNC Symbol;Acc:VGNC:55165]	-
ENSBTAG00000022825	413.7646318	410.8523032	444.1333097	612.4444156	604.1520519	820.4489655	422.9167482	679.0151443	-0.683304349	1.58E-05	0.000210827	BRI3	25	37736099	37744499	-	1168	protein_coding	brain protein I3 [Source:VGNC Symbol;Acc:VGNC:26564]	-
ENSBTAG00000039275	1202.689061	1262.546129	1338.231001	1678.439622	1857.057985	1721.677604	1267.822064	1752.391737	-0.466892272	1.59E-05	0.000211328	ERAP2	7	96303404	96356159	+	4585	protein_coding	Bos taurus endoplasmic reticulum aminopeptidase 2 (ERAP2), mRNA. [Source:RefSeq mRNA;Acc:NM_001075628]	-
ENSBTAG00000014078	5064.162335	5201.130251	5045.820884	3600.24796	3695.869767	4105.164575	5103.70449	3800.427434	0.425327011	1.59E-05	0.000211328	IGFBPL1	8	62441823	62458755	-	2809	protein_coding	Bos taurus insulin like growth factor binding protein like 1 (IGFBPL1), mRNA. [Source:RefSeq mRNA;Acc:NM_001099161]	I-set
ENSBTAG00000002418	562.2447628	549.8023522	524.7964709	323.8211852	321.3359068	149.8803567	545.6145286	265.0124829	1.042471815	1.59E-05	0.00021163	TICRR	21	21011537	21053211	+	5828	protein_coding	TOPBP1 interacting checkpoint and replication regulator [Source:VGNC Symbol;Acc:VGNC:35860]	-
novel.1030	372.1901951	381.8627246	357.6390765	215.2103529	259.5015525	220.9275387	370.5639987	231.8798147	0.676552424	1.60E-05	0.000212386	-	23	48409977	48413813	-	3302	-	-	-
ENSBTAG00000000375	2049.025808	1984.286671	1642.418585	1291.262118	1208.304104	1387.853173	1891.910355	1295.806465	0.545839301	1.61E-05	0.000213512	SSRP1	15	80527398	80537458	-	2839	protein_coding	Bos taurus structure specific recognition protein 1 (SSRP1), mRNA. [Source:RefSeq mRNA;Acc:NM_001101041]	HMG_box
ENSBTAG00000002280	4560.319757	4422.410193	4936.974208	3506.721966	3430.286147	3524.13488	4639.901386	3487.047664	0.41210362	1.62E-05	0.000214928	KIF5B	13	33326434	33372964	+	4467	protein_coding	Bos taurus kinesin family member 5B (KIF5B), mRNA. [Source:RefSeq mRNA;Acc:NM_001192365]	Kinesin
ENSBTAG00000008530	1034.411579	1072.614407	1242.018315	1726.711103	1498.215995	1604.887715	1116.3481	1609.938271	-0.528136251	1.63E-05	0.000215715	SLC36A4	29	1701573	1743386	+	5439	protein_coding	Bos taurus solute carrier family 36 member 4 (SLC36A4), mRNA. [Source:RefSeq mRNA;Acc:NM_001282523]	Aa_trans
ENSBTAG00000009462	1458.074887	1341.517739	1273.117365	786.4228784	843.3800456	1051.108995	1357.569997	893.6373063	0.603007784	1.65E-05	0.000218539	MDH2	25	34254236	34266939	+	1295	protein_coding	Bos taurus malate dehydrogenase 2 (MDH2), mRNA. [Source:RefSeq mRNA;Acc:NM_001013587]	-
ENSBTAG00000052532	369.2205925	386.8609278	401.3721157	252.4196196	249.3647731	247.2052636	385.8178787	249.6632188	0.6280338	1.66E-05	0.00021929	-	25	570916	573229	+	2022	protein_coding	-	WD40
ENSBTAG00000007608	924.5362824	991.6435152	1113.734733	1538.653458	1323.863389	1564.984504	1009.97151	1475.833783	-0.547212684	1.66E-05	0.00021998	BMT2	4	55467396	55544715	+	3214	protein_coding	base methyltransferase of 25S rRNA 2 homolog [Source:VGNC Symbol;Acc:VGNC:26528]	-
ENSBTAG00000011597	563.2346303	566.796243	584.0790353	380.1379131	386.2112949	258.8842525	571.3699695	341.7444868	0.742096303	1.68E-05	0.000221809	PDS5B	12	28312936	28495424	-	4546	protein_coding	PDS5 cohesin associated factor B [Source:VGNC Symbol;Acc:VGNC:32718]	-
ENSBTAG00000001652	453.3593334	507.8174453	402.3439611	782.400255	767.3542002	612.1736646	454.5069132	720.6427066	-0.664960919	1.72E-05	0.000226341	SLCO3A1	21	14842445	15219453	-	2216	protein_coding	Bos taurus solute carrier organic anion transporter family member 3A1 (SLCO3A1), mRNA. [Source:RefSeq mRNA;Acc:NM_001001134]	-
ENSBTAG00000016085	498.8932402	456.8357726	406.2313423	232.3065025	267.610976	319.2256948	453.986785	273.0477244	0.73293533	1.72E-05	0.000226341	IRAK1	X	37212625	37220146	-	3087	protein_coding	interleukin 1 receptor associated kinase 1 [Source:VGNC Symbol;Acc:VGNC:30264]	Pkinase
ENSBTAG00000019634	212.8215211	271.9022542	200.2001352	136.7691963	123.6687086	93.43191066	228.3079702	117.9566052	0.953244447	1.72E-05	0.000226749	PIDD1	29	50562017	50567664	+	3204	protein_coding	Bos taurus p53-induced death domain protein 1 (PIDD1), mRNA. [Source:RefSeq mRNA;Acc:NM_001191487]	Death
ENSBTAG00000006869	663.2112519	734.7358706	712.362617	424.3867707	473.3875977	254.9912562	703.4365798	384.2552082	0.872877926	1.73E-05	0.00022724	PHF20L1	14	8470928	8543137	-	3698	protein_coding	Bos taurus PHD finger protein 20 like 1 (PHF20L1), mRNA. [Source:RefSeq mRNA;Acc:NM_001082432]	-
ENSBTAG00000006177	3497.202019	3481.74835	3860.169597	4677.305381	4857.544686	4917.827548	3613.039989	4817.559205	-0.415067058	1.76E-05	0.00023185	ZDHHC20	12	35523662	35582364	+	4374	protein_coding	zinc finger DHHC-type containing 20 [Source:VGNC Symbol;Acc:VGNC:37136]	-
ENSBTAG00000010841	1002.735818	947.659327	1141.918247	1555.749607	1471.860368	1395.639165	1030.771131	1474.41638	-0.516244918	1.77E-05	0.000232993	FMO5	3	22466919	22510019	+	3939	protein_coding	Bos taurus flavin containing monooxygenase 5 (FMO5), mRNA. [Source:RefSeq mRNA;Acc:NM_001101304]	FMO-like
ENSBTAG00000031747	850.2962169	728.7380268	843.5617348	1138.402428	1105.922632	1355.735954	807.5319928	1200.020338	-0.571540979	1.77E-05	0.000232993	HMGN4	23	31565290	31573268	-	2335	protein_coding	Bos taurus high mobility group nucleosomal binding domain 4 (HMGN4), mRNA. [Source:RefSeq mRNA;Acc:NM_001046547]	-
ENSBTAG00000014273	168.2774818	162.9414244	167.1573944	92.52033864	96.29940425	72.9936802	166.1254335	87.27114103	0.929650514	1.80E-05	0.000236678	NRF1	4	93449966	93576616	+	2853	protein_coding	Bos taurus nuclear respiratory factor 1 (NRF1), mRNA. [Source:RefSeq mRNA;Acc:NM_001098002]	-
ENSBTAG00000033041	542.447412	508.8170859	591.8537978	786.4228784	761.2721325	961.5700805	547.7060986	836.4216972	-0.610926051	1.81E-05	0.000237007	YIPF4	11	14884680	14918172	+	1362	protein_coding	Yip1 domain family member 4 [Source:NCBI gene;Acc:615287]	-
ENSBTAG00000016650	102.9462242	93.96622019	66.08548153	40.22623419	18.24620291	32.11721929	87.66597529	30.19655213	1.536483713	1.81E-05	0.000237007	TIGAR	5	105732531	105747498	-	1269	protein_coding	Bos taurus TP53 induced glycolysis regulatory phosphatase (TIGAR), mRNA. [Source:RefSeq mRNA;Acc:NM_001076370]	-
ENSBTAG00000046846	671.1301922	682.7545573	680.2917216	405.2793095	427.7720905	512.9022596	678.0588237	448.6512198	0.595438775	1.81E-05	0.000237174	FAM32A	7	6830800	6837079	-	1405	protein_coding	Bos taurus family with sequence similarity 32 member A (FAM32A), mRNA. [Source:RefSeq mRNA;Acc:NM_001105004]	-
ENSBTAG00000007540	2410.32746	2330.162333	2382.964716	3097.420033	3147.470002	3827.78859	2374.484836	3357.559542	-0.49986754	1.82E-05	0.00023863	GLUD1	28	41609015	41649016	-	3047	protein_coding	Bos taurus glutamate dehydrogenase 1 (GLUD1), mRNA. [Source:RefSeq mRNA;Acc:NM_182652]	-
ENSBTAG00000001890	339.5245663	337.8785364	253.6516276	182.0237097	189.5577747	127.4956281	310.3515768	166.3590375	0.90014901	1.83E-05	0.00023947	RUBCN	1	70372268	70433147	+	4181	protein_coding	Bos taurus RUN and cysteine rich domain containing beclin 1 interacting protein (RUBCN), mRNA. [Source:RefSeq mRNA;Acc:NM_001101897]	RUN
ENSBTAG00000000711	25554.42041	25452.84998	25060.00333	32294.62646	31823.40523	33168.32828	25355.75791	32428.78666	-0.354965309	1.84E-05	0.000239775	NDRG1	14	8073208	8129604	+	3263	protein_coding	Bos taurus N-myc downstream regulated 1 (NDRG1), mRNA. [Source:RefSeq mRNA;Acc:NM_001035009]	Ndr
novel.70	76.21980059	79.97125122	72.88839874	178.0010863	131.7781321	145.9873604	76.35981685	151.9221929	-0.992621295	1.84E-05	0.000240367	-	1	133350452	133384271	-	4522	-	-	-
ENSBTAG00000019708	409.8051616	421.8483502	470.3731332	718.0382803	778.5046575	570.3239547	434.0088817	688.9556308	-0.666304114	1.85E-05	0.000240752	ACSL6	7	22477891	22541821	+	5225	protein_coding	Bos taurus acyl-CoA synthetase long chain family member 6 (ACSL6), mRNA. [Source:RefSeq mRNA;Acc:NM_001038042]	AMP-binding
ENSBTAG00000008721	1315.533961	1247.551519	1397.513565	1746.82422	1785.086851	2012.679075	1320.199682	1848.196716	-0.485390046	1.85E-05	0.000240752	MANSC1	5	97454273	97478531	+	1988	protein_coding	Bos taurus MANSC domain containing 1 (MANSC1), mRNA. [Source:RefSeq mRNA;Acc:NM_001075592]	-
ENSBTAG00000006346	2958.714077	2946.940608	2688.124146	2171.21099	2061.820929	2163.532681	2864.592944	2132.1882	0.425939004	1.85E-05	0.000240793	DAP	20	62513771	62580674	+	2255	protein_coding	Bos taurus death associated protein (DAP), mRNA. [Source:RefSeq mRNA;Acc:NM_001078058]	-
ENSBTAG00000017087	460.2884061	428.8458347	455.7954535	293.6515096	308.1580936	288.0817245	448.3098981	296.6304426	0.596026351	1.89E-05	0.000245744	TOP3A	19	34359100	34379578	+	4128	protein_coding	Bos taurus DNA topoisomerase III alpha (TOP3A), mRNA. [Source:RefSeq mRNA;Acc:NM_001077975]	Topoisom_bac
ENSBTAG00000052586	768.1372111	776.7207775	899.9287631	1154.492921	1109.977344	1284.688772	814.9289173	1183.053012	-0.537768421	1.89E-05	0.000246043	-	X	35777514	35782466	+	477	protein_coding	-	-
novel.1663	103.9360917	140.9493303	154.5234053	303.7080681	224.0228246	234.5530257	133.1362758	254.0946395	-0.932138427	1.92E-05	0.000248833	-	8	41269567	41300632	+	7102	-	-	-
ENSBTAG00000005668	7349.766485	7722.223946	8648.451472	10596.59574	10356.74751	12125.71016	7906.813968	11026.35113	-0.479792201	1.93E-05	0.00025056	SLC39A8	6	22459117	22542658	+	3179	protein_coding	Bos taurus solute carrier family 39 member 8 (SLC39A8), mRNA. [Source:RefSeq mRNA;Acc:NM_001205630]	-
ENSBTAG00000005816	409.8051616	432.8443972	309.0468107	578.2521165	599.0836622	821.4222146	383.8987898	666.2526644	-0.795823711	1.94E-05	0.00025066	IRF9	10	20986934	20992851	-	2732	protein_coding	interferon regulatory factor 9 [Source:VGNC Symbol;Acc:VGNC:30280]	IRF
ENSBTAG00000031750	0.98986754	0.99964064	2.91553595	23.13008466	11.15045733	38.92996278	1.63501471	24.40350159	-3.895188446	1.94E-05	0.00025066	PLAC8B	6	97881687	97916809	-	1980	protein_coding	placenta specific 8 B [Source:VGNC Symbol;Acc:VGNC:56782]	-
ENSBTAG00000004943	626.5861529	640.7696504	677.3761856	323.8211852	352.7599229	491.49078	648.2439963	389.3572961	0.734951684	1.95E-05	0.000252229	CCNA2	6	3425574	3431686	+	1807	protein_coding	Bos taurus cyclin A2 (CCNA2), mRNA. [Source:RefSeq mRNA;Acc:NM_001075123]	Cyclin_C
ENSBTAG00000011316	515.7209884	496.8213982	454.8236081	324.8268411	341.6094656	281.2689811	489.1219983	315.9017626	0.631018929	2.01E-05	0.000259503	ZC3H12A	3	108403027	108412520	-	2722	protein_coding	Bos taurus zinc finger CCCH-type containing 12A (ZC3H12A), mRNA. [Source:RefSeq mRNA;Acc:NM_001102187]	-
novel.908	54.4427147	42.98454753	69.00101748	110.622144	131.7781321	124.5758809	55.47609324	122.3253857	-1.139769385	2.02E-05	0.000260269	-	20	67797922	67800261	-	2340	-	-	-
ENSBTAG00000018937	2522.182492	2408.134302	2491.811392	1616.088959	1532.681044	1984.454852	2474.042729	1711.074952	0.531824644	2.02E-05	0.000260269	HMOX2	25	3626012	3654155	+	1762	protein_coding	Bos taurus heme oxygenase 2 (HMOX2), mRNA. [Source:RefSeq mRNA;Acc:NM_001035087]	-
ENSBTAG00000050393	20.78721834	20.99245345	18.46506101	61.34500714	65.88906606	50.60895161	20.0815776	59.28100827	-1.56153167	2.03E-05	0.000261468	-	17	48237530	48241659	+	189	protein_coding	-	-
ENSBTAG00000047998	5713.515441	5688.954884	5108.018984	4206.658441	4025.315098	3315.859579	5503.496436	3849.277706	0.515804401	2.03E-05	0.000261755	COL5A1	11	105268089	105419303	+	8088	protein_coding	collagen type V alpha 1 chain [Source:NCBI gene;Acc:100848491]	Collagen
ENSBTAG00000020330	8211.941113	8278.024142	8053.682138	5173.093717	4982.227072	6672.59562	8181.215798	5609.30547	0.544439856	2.05E-05	0.000263428	BTG1	5	22012139	22016602	-	2174	protein_coding	BTG anti-proliferation factor 1 [Source:VGNC Symbol;Acc:VGNC:26597]	-
ENSBTAG00000003058	384.0686056	344.8760209	297.3846669	172.972807	208.8176555	221.9007878	342.1097644	201.2304168	0.765158009	2.07E-05	0.00026598	ADRM1	13	54939568	54945372	-	1507	protein_coding	adhesion regulating molecule 1 [Source:VGNC Symbol;Acc:VGNC:25699]	-
ENSBTAG00000017550	708.7451587	667.7599477	749.2927391	968.4465882	976.1718557	1081.279716	708.5992818	1008.63272	-0.509378264	2.07E-05	0.00026598	CSNK1G3	7	30130216	30246199	-	4327	protein_coding	Bos taurus casein kinase 1 gamma 3 (CSNK1G3), mRNA. [Source:RefSeq mRNA;Acc:NM_001105329]	Pkinase
ENSBTAG00000000500	74.24006551	58.97879778	59.28256431	29.16401979	13.17781321	18.49173232	64.16714253	20.27785511	1.661898592	2.07E-05	0.00026598	PINX1	8	8476519	8542392	+	1321	protein_coding	Bos taurus PIN2 (TERF1) interacting telomerase inhibitor 1 (PINX1), mRNA. [Source:RefSeq mRNA;Acc:NM_001034553]	G-patch
ENSBTAG00000002651	1503.608793	1386.501568	1496.641788	1019.735037	1088.690107	1091.012207	1462.250716	1066.479117	0.455341359	2.08E-05	0.000267539	PKP2	5	77001511	77154610	+	4192	protein_coding	Bos taurus plakophilin 2 (PKP2), mRNA. [Source:RefSeq mRNA;Acc:NM_001083729]	Arm
ENSBTAG00000003424	589.9610539	584.7897746	691.9538654	912.1298603	848.4484353	1016.072028	622.234898	925.550108	-0.572856221	2.10E-05	0.000268785	BET1	4	11330484	11345143	-	3110	protein_coding	Bos taurus Bet1 golgi vesicular membrane trafficking protein (BET1), mRNA. [Source:RefSeq mRNA;Acc:NM_001099157]	-
ENSBTAG00000031509	357.342182	353.8727867	309.0468107	209.1764178	193.6124864	105.1108995	340.0872598	169.2999346	1.007162786	2.10E-05	0.000268858	PFAS	19	27879985	27895903	+	4580	protein_coding	Bos taurus phosphoribosylformylglycinamidine synthase (PFAS), mRNA. [Source:RefSeq mRNA;Acc:NM_001256564]	-
ENSBTAG00000030301	1053.219063	960.6546553	986.4229963	745.1909884	700.4514562	693.9265865	1000.098905	713.189677	0.487843167	2.11E-05	0.000270151	MAP7D1	3	109649571	109671174	-	3390	protein_coding	MAP7 domain containing 1 [Source:VGNC Symbol;Acc:VGNC:55611]	-
ENSBTAG00000054178	110.8651645	116.9579549	125.3680458	56.31672787	47.64286315	63.26118951	117.7303884	55.74026018	1.077879735	2.14E-05	0.000273559	-	4	54172627	54173103	+	477	protein_coding	ubiquitin conjugating enzyme E2 I [Source:NCBI gene;Acc:515573]	UQ_con
ENSBTAG00000010431	195.0039054	189.9317217	215.7496603	310.7476591	306.1307377	363.0219029	200.2284291	326.6334332	-0.7061264	2.15E-05	0.000274934	LURAP1L	8	31503232	31557952	-	1739	protein_coding	Bos taurus leucine rich adaptor protein 1 like (LURAP1L), mRNA. [Source:RefSeq mRNA;Acc:NM_001101256]	-
ENSBTAG00000021263	678.059265	636.7710879	745.4053578	1008.672822	1024.828397	925.559865	686.7452369	986.3536947	-0.522082597	2.17E-05	0.000277246	CYP4V2	27	16249747	16266690	+	4766	protein_coding	Bos taurus cytochrome P450, family 4, subfamily V, polypeptide 2 (CYP4V2), mRNA. [Source:RefSeq mRNA;Acc:NM_001034373]	p450
novel.141	1949.049186	2010.277328	1915.507119	2699.180314	2643.672066	2484.704874	1958.277878	2609.185751	-0.413992564	2.20E-05	0.000281141	-	10	14018275	14022843	-	3400	-	-	-
ENSBTAG00000011859	315.7677453	326.8824894	379.0196735	212.1933854	206.7902996	217.0345425	340.556636	212.0060758	0.683869769	2.21E-05	0.000281582	IPPK	8	84187019	84246783	-	4301	protein_coding	inositol-pentakisphosphate 2-kinase [Source:VGNC Symbol;Acc:VGNC:56974]	-
ENSBTAG00000012615	132.6422504	132.9522052	138.002035	66.37328642	72.98481164	36.01021557	134.5321635	58.45610454	1.204456848	2.24E-05	0.000285866	ZEB2	2	52268261	52305498	+	3309	protein_coding	zinc finger E-box binding homeobox 2 [Source:VGNC Symbol;Acc:VGNC:56157]	-
ENSBTAG00000017847	342.4941689	310.8882391	310.018656	223.2555998	183.475707	177.1313306	321.133688	194.6208791	0.722761129	2.25E-05	0.000286371	PPP1R12C	18	62291434	62309936	+	2912	protein_coding	protein phosphatase 1 regulatory subunit 12C [Source:VGNC Symbol;Acc:VGNC:52229]	-
ENSBTAG00000011527	103.9360917	74.97304802	64.14179089	32.18098735	28.3829823	31.14397022	81.01697687	30.56931329	1.405671296	2.26E-05	0.00028789	NT5C	19	56318393	56320652	+	1352	protein_coding	5', 3'-nucleotidase, cytosolic [Source:VGNC Symbol;Acc:VGNC:32289]	-
ENSBTAG00000002044	139.5713232	132.9522052	132.1709631	219.2329763	215.9134011	316.3059475	134.8981638	250.4841083	-0.893480812	2.27E-05	0.000288466	SIRT3	11	82879486	82902135	-	1538	protein_coding	Bos taurus sirtuin 3 (SIRT3), mRNA. [Source:RefSeq mRNA;Acc:NM_001206669]	SIR2
ENSBTAG00000010727	372.1901951	381.8627246	400.4002704	229.2895349	237.2006378	270.5632413	384.81773	245.6844713	0.647033543	2.28E-05	0.00028927	ATG4D	7	15053007	15061657	+	2123	protein_coding	Bos taurus autophagy related 4D cysteine peptidase (ATG4D), mRNA. [Source:RefSeq mRNA;Acc:NM_001099146]	-
ENSBTAG00000012063	300.9197322	275.9008167	259.4826995	168.9501836	120.6276748	178.1045797	278.7677495	155.894146	0.837752752	2.28E-05	0.000289667	E2F4	18	34827984	34834624	+	2037	protein_coding	Bos taurus E2F transcription factor 4 (E2F4), mRNA. [Source:RefSeq mRNA;Acc:NM_001075873]	E2F_TDP
ENSBTAG00000008131	413.7646318	384.8616465	423.724558	223.2555998	298.0213142	209.2485499	407.4502788	243.508488	0.743266943	2.29E-05	0.00029045	RNF115	3	21532899	21598565	+	1423	protein_coding	Bos taurus ring finger protein 115 (RNF115), mRNA. [Source:RefSeq mRNA;Acc:NM_001076308]	-
ENSBTAG00000014315	10.88854294	19.99281281	15.54952506	66.37328642	35.47872788	67.15418579	15.47696027	56.33540003	-1.865115302	2.31E-05	0.000292707	PBLD	28	24716180	24739190	-	1596	protein_coding	Bos taurus phenazine biosynthesis like protein domain containing (PBLD), mRNA. [Source:RefSeq mRNA;Acc:NM_001045886]	-
ENSBTAG00000020458	1338.300914	1355.512708	1246.877541	951.3504386	985.2949572	800.010735	1313.563721	912.2187103	0.526209453	2.31E-05	0.000292707	STX6	16	62097520	62148288	-	2630	protein_coding	Bos taurus syntaxin 6 (STX6), mRNA. [Source:RefSeq mRNA;Acc:NM_001082431]	-
ENSBTAG00000014471	3252.704737	3261.827409	3370.359558	2565.428086	2453.100613	2086.646005	3294.963901	2368.391568	0.47645471	2.31E-05	0.000292707	AKAP2	8	99312764	99721951	+	8760	protein_coding	Bos taurus A-kinase anchoring protein 2 (AKAP2), mRNA. [Source:RefSeq mRNA;Acc:NM_001193034]	-
ENSBTAG00000000285	330.6157584	305.8900359	383.8789	598.3652336	493.6611565	514.8487577	340.1282315	535.6250493	-0.654848557	2.35E-05	0.000297369	GUF1	6	63290365	63314983	+	2286	protein_coding	Bos taurus GUF1 homolog, GTPase (GUF1), mRNA. [Source:RefSeq mRNA;Acc:NM_001102067]	GTP_EFTU
ENSBTAG00000016762	486.0249622	483.8260699	533.5430788	686.8629488	715.6566253	835.0477015	501.1313703	745.8557585	-0.573810884	2.36E-05	0.000297618	SLC25A12	2	24637412	24736032	+	4018	protein_coding	Bos taurus solute carrier family 25 member 12 (SLC25A12), mRNA. [Source:RefSeq mRNA;Acc:NM_001101194]	Mito_carr
ENSBTAG00000013393	247.466885	241.913035	234.2147213	163.9219043	115.5592851	127.4956281	241.1982138	135.6589392	0.830286427	2.37E-05	0.000299244	GEMIN4	19	22088342	22096721	+	4231	protein_coding	gem nuclear organelle associated protein 4 [Source:VGNC Symbol;Acc:VGNC:29317]	-
ENSBTAG00000003616	479.0958894	446.8393662	505.3595646	329.8551204	311.1991274	233.5797767	477.0982734	291.5446748	0.711203307	2.38E-05	0.000299779	DCLRE1B	3	29473236	29479991	-	2506	protein_coding	DNA cross-link repair 1B [Source:VGNC Symbol;Acc:VGNC:27917]	-
ENSBTAG00000052466	206.8823159	237.9144724	247.8205557	67.37894227	66.902744	153.773353	230.872448	96.01834641	1.264123708	2.40E-05	0.000302425	-	4	76611350	76614443	+	854	protein_coding	-	-
ENSBTAG00000049308	1094.793499	1133.592486	1269.229983	856.8187883	837.297978	738.6960437	1165.87199	810.9376033	0.523982637	2.43E-05	0.000306096	GAS2L3	5	64482719	64517445	+	4459	protein_coding	growth arrest specific 2 like 3 [Source:NCBI gene;Acc:782903]	CH
ENSBTAG00000015242	446.4302606	399.8562561	411.0905689	571.2125255	622.3982548	699.7660809	419.1256952	631.1256204	-0.590738101	2.46E-05	0.000309014	SLC18B1	9	70929915	70965392	-	1534	protein_coding	solute carrier family 18 member B1 [Source:VGNC Symbol;Acc:VGNC:34708]	MFS_1
ENSBTAG00000008410	81.16913829	58.97879778	85.52238786	163.9219043	122.6550307	207.3020518	75.22344131	164.6263289	-1.13004504	2.47E-05	0.000310389	OVOL2	13	38271785	38300529	-	1724	protein_coding	Bos taurus ovo like zinc finger 2 (OVOL2), mRNA. [Source:RefSeq mRNA;Acc:NM_001206007]	-
ENSBTAG00000018134	155.4092038	192.9306436	154.5234053	44.24885761	69.94377782	101.2179032	167.6210842	71.80351288	1.221526975	2.48E-05	0.000310996	AREG	6	89379645	89391792	+	1381	protein_coding	Bos taurus amphiregulin (AREG), mRNA. [Source:RefSeq mRNA;Acc:NM_001099092]	-
ENSBTAG00000016021	762.1980059	703.7470108	681.2635669	1145.442019	1072.47126	923.6133668	715.7361945	1047.175548	-0.548887819	2.49E-05	0.000313024	GAA	19	52483395	52499075	-	3434	protein_coding	glucosidase alpha, acid [Source:VGNC Symbol;Acc:VGNC:29182]	Glyco_hydro_31
ENSBTAG00000051333	2423.195738	2420.12999	2287.723875	1862.474643	1705.006294	1761.580816	2377.016534	1776.353918	0.420206525	2.52E-05	0.000315518	ARID5B	28	17916578	18109450	+	7442	protein_coding	AT-rich interaction domain 5B [Source:NCBI gene;Acc:783538]	ARID
novel.1370	45.53390684	53.98059458	77.74762532	171.9671512	152.0516909	100.2446541	59.08737558	141.4211654	-1.257730949	2.55E-05	0.000319969	-	4	24478425	24494781	-	3486	-	-	-
ENSBTAG00000019888	469.197214	425.8469128	382.9070547	279.5723276	233.1459261	285.1619773	425.9837272	265.960077	0.67916534	2.57E-05	0.000321342	HIRA	17	72647476	72693052	-	5165	protein_coding	histone cell cycle regulator [Source:VGNC Symbol;Acc:VGNC:50616]	WD40
ENSBTAG00000016350	982.9384673	944.6604051	914.5064429	635.5745002	646.7265254	395.1391222	947.3684384	559.1467159	0.761072605	2.57E-05	0.000321383	NACC1	7	12444337	12461920	-	4580	protein_coding	Bos taurus nucleus accumbens associated 1 (NACC1), mRNA. [Source:RefSeq mRNA;Acc:NM_001192612]	BTB
ENSBTAG00000003946	77.20966813	68.97520418	76.77578001	21.11877295	24.32827055	36.98346464	74.32021744	27.47683604	1.433416758	2.58E-05	0.000322769	NECAB3	13	63108923	63127630	-	2000	protein_coding	Bos taurus N-terminal EF-hand calcium binding protein 3 (NECAB3), mRNA. [Source:RefSeq mRNA;Acc:NM_001081589]	ABM
ENSBTAG00000013302	672.1200597	768.7236524	667.6577325	455.5621022	472.3739198	285.1619773	702.8338149	404.3659998	0.797963536	2.59E-05	0.000323141	R3HDM1	2	61636892	61799766	-	4548	protein_coding	R3H domain containing 1 [Source:NCBI gene;Acc:533850]	R3H
ENSBTAG00000009127	581.052246	534.8077426	563.6702836	782.400255	762.2858105	862.2986755	559.8434241	802.328247	-0.519284427	2.60E-05	0.000324629	TSPYL4	9	34447805	34451897	+	4093	protein_coding	Bos taurus TSPY like 4 (TSPYL4), mRNA. [Source:RefSeq mRNA;Acc:NM_001101064]	-
novel.288	38.60483406	40.98526625	34.01458608	81.45812424	94.27204837	87.59241624	37.8682288	87.77419628	-1.21323863	2.64E-05	0.000329401	-	12	31440860	31458798	+	2860	-	PF07690:Major Facilitator Superfamily	MFS_1
ENSBTAG00000002117	219.7505939	226.9184253	268.2293074	146.8257548	119.6139969	142.0943641	238.2994422	136.1780386	0.807203414	2.65E-05	0.000329401	KIF18A	15	58720346	58806311	-	4727	protein_coding	Bos taurus kinesin family member 18A (KIF18A), mRNA. [Source:RefSeq mRNA;Acc:NM_001192909]	Kinesin
ENSBTAG00000023787	580.0623785	469.8311009	438.3022378	301.6967564	334.51372	295.8677171	496.0652391	310.6927312	0.675130098	2.65E-05	0.000329401	TOR4A	11	106277920	106279140	+	1221	protein_coding	torsin family 4 member A [Source:VGNC Symbol;Acc:VGNC:36227]	-
ENSBTAG00000003314	453.3593334	507.8174453	569.5013555	344.9399582	329.4453303	321.1721929	510.2260447	331.8524938	0.620815013	2.67E-05	0.000332764	SKA3	12	35583971	35597394	+	2320	protein_coding	Bos taurus spindle and kinetochore associated complex subunit 3 (SKA3), mRNA. [Source:RefSeq mRNA;Acc:NM_001110067]	-
ENSBTAG00000040334	812.6812504	939.6622019	804.6879221	618.4783507	591.9879166	531.3939919	852.3437915	580.6200864	0.553936389	2.70E-05	0.000335838	MEX3D	7	43947454	43955283	-	2226	protein_coding	mex-3 RNA binding family member D [Source:HGNC Symbol;Acc:HGNC:16734]	KH_1
ENSBTAG00000002714	174.2166871	182.9342372	227.4118041	79.44681253	92.24469249	123.6026318	194.8542428	98.43137894	0.984425255	2.73E-05	0.000339532	GNAI1	4	40956253	41062151	-	3435	protein_coding	G protein subunit alpha i1 [Source:VGNC Symbol;Acc:VGNC:29449]	G-alpha
ENSBTAG00000009956	175.2065546	179.9353153	180.7632289	100.5655855	99.34043807	102.1911523	178.6350329	100.6990586	0.826886541	2.78E-05	0.000344874	CENPM	5	112916658	112928741	-	1173	protein_coding	Bos taurus centromere protein M (CENPM), mRNA. [Source:RefSeq mRNA;Acc:NM_001038686]	-
ENSBTAG00000012170	3000.288514	3243.833878	3539.460643	4404.772644	4250.3516	4683.274522	3261.194345	4446.132922	-0.447149856	2.81E-05	0.000349039	UBL3	12	30806229	30854060	+	3389	protein_coding	Bos taurus ubiquitin like 3 (UBL3), mRNA. [Source:RefSeq mRNA;Acc:NM_001038144]	-
ENSBTAG00000000245	724.5830393	714.7430578	714.3063077	524.9523562	494.6748345	389.2996278	717.8774683	469.6422728	0.612561119	2.82E-05	0.000349039	NHSL1	9	76205680	76463385	-	8405	protein_coding	Bos taurus NHS like 1 (NHSL1), mRNA. [Source:RefSeq mRNA;Acc:NM_001191538]	-
ENSBTAG00000018517	2297.482561	2244.193237	2236.216073	2954.616901	2865.667535	3141.647996	2259.29729	2987.310811	-0.403025653	2.84E-05	0.00035138	VLDLR	8	41826623	41860757	-	5939	protein_coding	very low density lipoprotein receptor [Source:VGNC Symbol;Acc:VGNC:36803]	Ldl_recept_a
ENSBTAG00000016168	23773.64871	23884.41382	23377.73909	30025.86686	29480.79551	32301.16336	23678.60054	30602.60858	-0.370077845	2.84E-05	0.00035138	APLP2	29	36262912	36325816	+	4512	protein_coding	amyloid beta precursor like protein 2 [Source:VGNC Symbol;Acc:VGNC:26020]	Kunitz_BPTI
ENSBTAG00000018604	318.7373479	349.8742241	289.6099043	569.2012138	563.6049343	424.3365942	319.4071588	519.0475808	-0.700347283	2.85E-05	0.000352633	SEMA4G	26	21809188	21822827	+	4326	protein_coding	Bos taurus semaphorin 4G (SEMA4G), mRNA. [Source:RefSeq mRNA;Acc:NM_001101117]	Sema
ENSBTAG00000002129	2558.807591	2748.01212	2704.645516	2006.28343	1911.796594	2089.565752	2670.488409	2002.548592	0.415205497	2.85E-05	0.000352633	KLF5	12	47799472	47818754	+	3289	protein_coding	Bos taurus Kruppel like factor 5 (KLF5), mRNA. [Source:RefSeq mRNA;Acc:NM_001083727]	zf-C2H2
ENSBTAG00000011786	620.6469476	591.7872591	552.0081398	391.2001275	405.4711758	270.5632413	588.1474488	355.7448482	0.725830202	2.86E-05	0.000353582	CLUH	19	23586772	23608018	-	6236	protein_coding	clustered mitochondria homolog [Source:VGNC Symbol;Acc:VGNC:50138]	-
ENSBTAG00000012441	710.7248938	732.7365893	698.7567826	1028.785939	969.0761101	964.4898278	714.0727552	987.4506258	-0.467651161	2.90E-05	0.000357966	SMAD7	24	48598830	48627410	-	2686	protein_coding	Bos taurus SMAD family member 7 (SMAD7), mRNA. [Source:RefSeq mRNA;Acc:NM_001192865]	MH2
ENSBTAG00000013496	169.2673494	204.9263313	180.7632289	287.6175745	303.0897039	309.4932041	184.9856365	300.0668275	-0.698129769	2.91E-05	0.000358128	CPM	5	44876588	44960458	+	4524	protein_coding	carboxypeptidase M [Source:VGNC Symbol;Acc:VGNC:27655]	-
ENSBTAG00000015666	26.72642358	24.99101601	69.00101748	9.050902693	7.095745576	0.973249069	40.23948569	5.706632446	2.824756911	2.92E-05	0.000359394	-	4	32435032	32536675	-	4860	protein_coding	-	ABC_membrane
ENSBTAG00000032603	1172.993035	1220.561222	1229.384325	927.2146981	847.4347574	718.2578132	1207.646194	830.9690896	0.539554779	2.93E-05	0.000360326	-	12	69482002	69666089	-	4028	protein_coding	multidrug resistance-associated protein 4 [Source:NCBI gene;Acc:515333]	ABC_membrane
novel.1258	92.05768123	80.97089186	91.35345976	168.9501836	194.6261644	142.0943641	88.12734428	168.556904	-0.934828826	2.95E-05	0.000362638	-	29	50191039	50199328	-	3467	-	PF08742:C8 domain|PF00007:Cystine-knot domain|PF00094:von Willebrand factor type D domain	VWD
ENSBTAG00000051730	84.13874091	61.9777197	49.56411114	19.10746124	27.36930437	8.759241624	65.22685725	18.41200241	1.82805835	3.01E-05	0.000369667	-	NKLS02002005.1	67957	69416	-	1460	lncRNA	-	-
ENSBTAG00000007079	1359.088133	1354.513068	1301.300879	1019.735037	936.6384161	994.6605489	1338.300693	983.6780006	0.444072738	3.03E-05	0.000372101	LCP1	12	16207287	16313140	-	4937	protein_coding	lymphocyte cytosolic protein 1 [Source:VGNC Symbol;Acc:VGNC:30817]	CH
ENSBTAG00000017744	513.7412533	464.8328977	517.0217084	342.9286465	304.1033818	346.4766687	498.5319532	331.1695657	0.589998476	3.03E-05	0.000372233	FAF2	7	37916685	37985670	+	2149	protein_coding	Bos taurus Fas associated factor family member 2 (FAF2), mRNA. [Source:RefSeq mRNA;Acc:NM_001077020]	-
ENSBTAG00000004879	172.236952	175.9367527	158.4107866	258.4535547	306.1307377	269.5899922	168.8614971	278.0580949	-0.719585734	3.05E-05	0.000374043	FOXO4	X	79528190	79535525	-	3520	protein_coding	Bos taurus forkhead box O4 (FOXO4), mRNA. [Source:RefSeq mRNA;Acc:NM_001101277]	Fork_head
ENSBTAG00000020273	137.5915881	147.9468148	147.7204881	71.40156569	84.13526898	43.79620812	144.4196303	66.4443476	1.12176275	3.06E-05	0.000375237	YOD1	16	4869646	4871892	-	1235	protein_coding	Bos taurus YOD1 deubiquitinase (YOD1), mRNA. [Source:RefSeq mRNA;Acc:NM_001080309]	-
ENSBTAG00000039552	575.1130408	649.7664162	701.6723186	400.2510302	399.3891081	469.1060514	642.1839252	422.9153966	0.602403459	3.07E-05	0.000376141	PLK4	17	29774988	29792009	-	3435	protein_coding	Bos taurus polo like kinase 4 (PLK4), mRNA. [Source:RefSeq mRNA;Acc:NM_001083427]	Pkinase
ENSBTAG00000008443	3082.44752	2979.928749	2846.534932	2354.240356	2121.627927	1864.745217	2969.637067	2113.537833	0.490700809	3.11E-05	0.00038016	LARP1	7	65952521	66013847	+	6733	protein_coding	La ribonucleoprotein domain family member 1 [Source:VGNC Symbol;Acc:VGNC:30790]	-
ENSBTAG00000010324	328.6360233	289.8957857	358.6109218	212.1933854	204.7629438	181.997576	325.7142436	199.6513017	0.70668195	3.12E-05	0.000381129	GTPBP1	5	110334791	110358382	+	3579	protein_coding	Bos taurus GTP binding protein 1 (GTPBP1), mRNA. [Source:RefSeq mRNA;Acc:NM_001017938]	GTP_EFTU
ENSBTAG00000021918	314.7778777	368.8673963	340.1458608	482.7148103	523.0578168	529.4474937	341.2637116	511.7400403	-0.58467032	3.12E-05	0.000381629	EZH1	19	42754606	42786890	-	4913	protein_coding	Bos taurus enhancer of zeste 1 polycomb repressive complex 2 subunit (EZH1), mRNA. [Source:RefSeq mRNA;Acc:NM_001102151]	SET
ENSBTAG00000018447	695.8768807	678.7559948	730.8276781	929.2260098	1006.582194	1296.36776	701.8201845	1077.391988	-0.618527453	3.15E-05	0.000384247	RABGGTB	3	69057556	69065985	-	1457	protein_coding	Rab geranylgeranyltransferase subunit beta [Source:VGNC Symbol;Acc:VGNC:33671]	-
ENSBTAG00000024534	223.7100641	222.9198628	182.7069195	113.6391116	109.4772175	46.71595533	209.7789488	89.94409479	1.223074911	3.15E-05	0.000384513	POU2F1	3	1280068	1481060	-	3778	protein_coding	Bos taurus POU class 2 homeobox 1 (POU2F1), mRNA. [Source:RefSeq mRNA;Acc:NM_001075582]	Pou
ENSBTAG00000000880	919.5869447	921.6686704	1012.66282	1379.759833	1219.454561	1631.16544	951.306145	1410.126611	-0.567947074	3.20E-05	0.000389475	GINM1	9	86800152	86818093	+	1461	protein_coding	Bos taurus glycoprotein integral membrane 1 (GINM1), mRNA. [Source:RefSeq mRNA;Acc:NM_001038509]	-
ENSBTAG00000020059	776.0561514	710.7444953	847.449116	559.1446553	536.23563	513.8755086	778.0832542	536.418598	0.536793841	3.21E-05	0.000391045	GEN1	11	80822886	80851879	-	3864	protein_coding	Bos taurus GEN1, Holliday junction 5' flap endonuclease (GEN1), mRNA. [Source:RefSeq mRNA;Acc:NM_001205450]	XPG_I
ENSBTAG00000009663	3165.596393	3138.871611	2876.662137	2349.212077	2295.980533	2292.974807	3060.376714	2312.722472	0.404092703	3.27E-05	0.000397448	YBX3	5	98853392	98878560	+	1539	protein_coding	Y-box binding protein 3 [Source:VGNC Symbol;Acc:VGNC:37018]	CSD
ENSBTAG00000049411	152.4396012	140.9493303	127.3117365	268.5101132	226.0501805	226.7670332	140.233556	240.4424423	-0.777965305	3.27E-05	0.000397538	-	X	138855866	139001761	+	1354	protein_coding	-	adh_short
ENSBTAG00000006963	4479.150619	4452.399412	5334.458943	6480.446328	6842.326091	11311.10068	4755.336324	8211.291035	-0.788081601	3.28E-05	0.000398062	RPL12	11	98179658	98183783	-	597	protein_coding	60S ribosomal protein L12 [Source:UniProtKB/Swiss-Prot;Acc:P61284]	-
ENSBTAG00000014326	565.2143654	589.7879778	655.0237434	410.3075888	385.197617	430.1760887	603.3420288	408.5604315	0.562348236	3.28E-05	0.000398062	CDCA8	3	108198136	108213207	-	2204	protein_coding	Bos taurus cell division cycle associated 8 (CDCA8), mRNA. [Source:RefSeq mRNA;Acc:NM_001083652]	-
ENSBTAG00000012135	299.9298646	236.9148318	247.8205557	143.8087872	172.3252497	112.896892	261.555084	143.0103097	0.871849155	3.29E-05	0.000399175	LARP1B	17	29525417	29663774	-	7191	protein_coding	La ribonucleoprotein domain family member 1B [Source:VGNC Symbol;Acc:VGNC:30791]	-
ENSBTAG00000009960	607.7786696	560.7983992	508.2751006	751.2249235	822.0928089	920.6936196	558.9507231	831.3371174	-0.572969012	3.30E-05	0.000399851	FLOT1	23	28286486	28296570	+	2093	protein_coding	Bos taurus flotillin 1 (FLOT1), mRNA. [Source:RefSeq mRNA;Acc:NM_001076887]	-
ENSBTAG00000047158	52.46297962	38.98598497	49.56411114	8.045246838	17.23252497	13.62548697	47.00435858	12.96775293	1.858302709	3.32E-05	0.000402081	LRFN1	18	49017345	49024476	-	3429	protein_coding	leucine rich repeat and fibronectin type III domain containing 1 [Source:VGNC Symbol;Acc:VGNC:30975]	I-set
ENSBTAG00000017027	46.52377438	48.98239137	42.76119393	9.050902693	19.25988085	6.812743486	46.0891199	11.70784234	1.980743315	3.33E-05	0.000402738	MMACHC	3	100566182	100571190	-	1336	protein_coding	Bos taurus metabolism of cobalamin associated C (MMACHC), mRNA. [Source:RefSeq mRNA;Acc:NM_001015588]	-
ENSBTAG00000020035	19224.2175	18938.19193	18642.90871	24681.81164	24672.92105	32661.26552	18935.10604	27338.66607	-0.529890684	3.33E-05	0.000402853	RCAN1	1	882081	1002223	+	2712	protein_coding	Bos taurus regulator of calcineurin 1 (RCAN1), mRNA. [Source:RefSeq mRNA;Acc:NM_001034679]	-
ENSBTAG00000015718	799.8129724	914.6711859	917.4219788	1164.54948	1227.563985	1328.48498	877.3020457	1240.199481	-0.499495662	3.35E-05	0.000405293	CASP8	2	89861141	89885545	+	3394	protein_coding	Bos taurus caspase 8 (CASP8), mRNA. [Source:RefSeq mRNA;Acc:NM_001045970]	Peptidase_C14
ENSBTAG00000003259	1361.067868	1267.544332	1271.173674	1012.695446	884.9408411	766.9202667	1299.928625	888.1855179	0.549680395	3.36E-05	0.000405301	TCERG1	7	57646493	57697609	+	3582	protein_coding	transcription elongation regulator 1 [Source:VGNC Symbol;Acc:VGNC:35685]	FF
ENSBTAG00000014191	6757.825696	6647.610258	6792.226917	8552.097389	8722.698669	8492.571379	6732.554291	8589.122479	-0.35134764	3.43E-05	0.000413521	QSOX1	16	61362225	61403864	+	3230	protein_coding	quiescin sulfhydryl oxidase 1 [Source:VGNC Symbol;Acc:VGNC:33605]	Evr1_Alr
ENSBTAG00000017831	1222.486412	1126.595002	1201.200811	1581.89666	1552.954603	1657.443165	1183.427408	1597.431476	-0.432801106	3.44E-05	0.000414215	ERLIN2	27	33016693	33033829	+	4021	protein_coding	Bos taurus ER lipid raft associated 2 (ERLIN2), mRNA. [Source:RefSeq mRNA;Acc:NM_001046576]	-
ENSBTAG00000001188	155.4092038	118.9572362	152.5797147	235.32347	241.2553496	255.9645052	142.3153849	244.1811083	-0.778632507	3.54E-05	0.000426842	ROM1	29	40955641	40959667	+	2057	protein_coding	retinal outer segment membrane protein 1 [Source:VGNC Symbol;Acc:VGNC:34084]	Tetraspannin
novel.80	20.78721834	29.98921921	27.21166886	81.45812424	50.68389697	88.56566531	25.99603547	73.56922884	-1.501640661	3.55E-05	0.00042775	-	1	157196698	157198474	-	827	-	-	-
ENSBTAG00000011934	537.4980743	502.8192421	574.3605821	768.3210731	729.8481164	827.261709	538.2259661	775.1436328	-0.526257332	3.57E-05	0.000429321	PCK2	10	21036261	21044548	-	2229	protein_coding	Bos taurus phosphoenolpyruvate carboxykinase 2, mitochondrial (PCK2), mRNA. [Source:RefSeq mRNA;Acc:NM_001205594]	-
ENSBTAG00000024657	404.8558239	378.8638027	368.329375	271.5270808	223.0091467	163.5058437	384.0163338	219.347357	0.808567076	3.57E-05	0.000429321	-	15	81890485	81926989	+	1784	protein_coding	ZFP91 zinc finger protein [Source:NCBI gene;Acc:529006]	-
ENSBTAG00000007743	320.717083	362.8695524	372.2167562	196.1028917	227.0638584	237.4727729	351.9344639	220.2131743	0.676211296	3.57E-05	0.000429321	PUS7	4	46586617	46640231	-	3202	protein_coding	Bos taurus pseudouridylate synthase 7 (PUS7), mRNA. [Source:RefSeq mRNA;Acc:NM_001076939]	-
ENSBTAG00000016505	696.8667482	648.7667756	665.7140418	419.3584914	499.7432242	324.0919401	670.4491885	414.3978852	0.694604396	3.58E-05	0.000429385	TMC7	25	16931193	16989972	-	2420	protein_coding	transmembrane channel like 7 [Source:VGNC Symbol;Acc:VGNC:35923]	-
ENSBTAG00000002455	317.7474804	322.8839268	299.3283575	453.5507905	457.1687507	482.7315384	313.3199216	464.4836932	-0.568222179	3.58E-05	0.000429507	KLHL8	6	102066192	102119154	-	2303	protein_coding	kelch like family member 8 [Source:VGNC Symbol;Acc:VGNC:30670]	BACK
ENSBTAG00000002233	826.539396	752.7294021	637.5305277	480.7034986	529.1398844	436.9888322	738.9331086	482.277405	0.61570296	3.59E-05	0.000430595	CPNE2	18	25134033	25166257	+	2127	protein_coding	Bos taurus copine 2 (CPNE2), mRNA. [Source:RefSeq mRNA;Acc:NM_001243331]	C2
ENSBTAG00000014806	139.5713232	184.9335185	170.0729304	297.674133	323.3632627	242.3390183	164.8592573	287.792138	-0.803461856	3.60E-05	0.000431219	ATP2A3	19	24551813	24586083	-	4822	protein_coding	Bos taurus ATPase sarcoplasmic/endoplasmic reticulum Ca2+ transporting 3 (ATP2A3), mRNA. [Source:RefSeq mRNA;Acc:NM_001114154]	E1-E2_ATPase
ENSBTAG00000007860	1090.834029	1083.610454	1153.580391	782.400255	796.7508604	546.965977	1109.341625	708.7056975	0.646786428	3.63E-05	0.000434693	ASPM	16	76021939	76082066	-	10541	protein_coding	Bos taurus asp (abnormal spindle) homolog, microcephaly associated (Drosophila) (ASPM), mRNA. [Source:RefSeq mRNA;Acc:NM_001206506]	CH
ENSBTAG00000000139	216.7809913	248.9105194	190.481682	140.7918197	115.5592851	102.1911523	218.7243976	119.5140857	0.872191715	3.66E-05	0.00043804	KMT5A	17	52211310	52228130	-	1071	protein_coding	lysine methyltransferase 5A [Source:VGNC Symbol;Acc:VGNC:53910]	SET
ENSBTAG00000005807	3256.664207	3408.774583	3352.866342	4272.026071	4348.67836	5229.26725	3339.435044	4616.657227	-0.467300593	3.70E-05	0.000441724	MICU1	28	28402858	28619073	-	2505	protein_coding	Bos taurus mitochondrial calcium uptake 1 (MICU1), mRNA. [Source:RefSeq mRNA;Acc:NM_001075338]	-
ENSBTAG00000003469	1158.145022	1131.593205	1279.920282	1544.687393	1656.349753	1987.3746	1189.88617	1729.470582	-0.539565096	3.70E-05	0.000441724	CHURC1	10	77048025	77066487	+	3091	protein_coding	Bos taurus churchill domain containing 1 (CHURC1), mRNA. [Source:RefSeq mRNA;Acc:NM_001046581]	Churchill
ENSBTAG00000019915	1401.652437	1475.469585	1548.149589	1932.870553	1941.193254	2239.446109	1475.090537	2037.836639	-0.466296595	3.70E-05	0.000441724	GSN	8	110686132	110733968	+	3286	protein_coding	Bos taurus gelsolin (GSN), transcript variant 1, mRNA. [Source:RefSeq mRNA;Acc:NM_001113284]	-
ENSBTAG00000004549	347.4435066	333.8799739	347.9206233	205.1537944	231.1185702	226.7670332	343.0813679	221.0131326	0.634404379	3.72E-05	0.000443053	UPRT	X	75909884	75941925	-	3045	protein_coding	uracil phosphoribosyltransferase homolog [Source:VGNC Symbol;Acc:VGNC:36690]	-
ENSBTAG00000031789	417.7241019	430.845116	396.5128892	282.5892952	245.3100613	153.773353	415.027369	227.2242365	0.869758939	3.72E-05	0.000443151	FBRS	25	26783860	26794861	+	3946	protein_coding	fibrosin [Source:NCBI gene;Acc:615050]	-
ENSBTAG00000013779	482.065492	481.8267886	463.570216	327.8438087	329.4453303	246.2320146	475.8208322	301.1737178	0.660347786	3.73E-05	0.000443671	HSPA12A	26	37069912	37241123	-	4032	protein_coding	heat shock protein family A (Hsp70) member 12A [Source:VGNC Symbol;Acc:VGNC:55956]	-
ENSBTAG00000018036	2140.093622	2178.216955	2568.587172	3034.063714	3130.237477	3576.69033	2295.632583	3246.997174	-0.500212824	3.77E-05	0.000447692	CNOT7	27	19986516	20001556	+	2623	protein_coding	Bos taurus CCR4-NOT transcription complex subunit 7 (CNOT7), mRNA. [Source:RefSeq mRNA;Acc:NM_001034312]	CAF1
ENSBTAG00000031950	398.9166187	389.8598497	414.0061049	556.1276877	568.673324	713.3915679	400.9275244	612.7308599	-0.612148449	3.77E-05	0.000447692	RAB3IP	5	43657005	43713702	-	2605	protein_coding	Bos taurus RAB3A interacting protein (RAB3IP), mRNA. [Source:RefSeq mRNA;Acc:NM_001046347]	-
ENSBTAG00000012525	183.1254949	136.9507677	211.862279	270.5214249	319.3085509	387.3531296	177.3128472	325.7277018	-0.877206749	3.77E-05	0.000447692	ABO	11	104176840	104214809	-	2533	protein_coding	ABO, alpha 1-3-N-acetylgalactosaminyltransferase and alpha 1-3-galactosyltransferase [Source:VGNC Symbol;Acc:VGNC:25510]	-
ENSBTAG00000022227	3243.795929	3167.861189	3818.380249	4728.593829	4434.840985	5022.938447	3410.012456	4728.791087	-0.471679252	3.81E-05	0.000451757	PLSCR2	1	121946372	121974115	+	1899	protein_coding	Bos taurus phospholipid scramblase 1 (PLSCR2), mRNA. [Source:RefSeq mRNA;Acc:NM_001034436]	Scramblase
ENSBTAG00000001139	236.5783421	206.9256125	225.4681134	131.740917	141.9149115	97.32490694	222.9906894	123.6602451	0.851635513	3.81E-05	0.000451925	ACHE	25	35762361	35768977	+	3084	protein_coding	acetylcholinesterase (Cartwright blood group) [Source:NCBI gene;Acc:540446]	COesterase
ENSBTAG00000015361	64.34139011	65.97628226	41.78934861	12.06787026	25.34194849	12.6522379	57.36900699	16.68735222	1.78326268	3.83E-05	0.000453058	CNTFR	8	75920507	75958549	-	3244	protein_coding	ciliary neurotrophic factor receptor [Source:VGNC Symbol;Acc:VGNC:27535]	fn3
ENSBTAG00000054228	98.98675401	112.9593924	90.38161444	32.18098735	50.68389697	48.66245347	100.7759203	43.84244593	1.200106142	3.83E-05	0.000453058	-	16	52436774	52521621	-	4577	protein_coding	-	-
ENSBTAG00000003508	198.9633756	121.9561581	169.1010851	290.634542	303.0897039	281.2689811	163.3402063	291.664409	-0.836049485	3.83E-05	0.000453058	CFAP69	4	74443217	74502981	+	2826	protein_coding	cilia and flagella associated protein 69 [Source:VGNC Symbol;Acc:VGNC:27249]	-
ENSBTAG00000006347	699.8363508	730.7373081	745.4053578	492.7713688	543.3313756	495.3837763	725.3263389	510.4955069	0.506882471	3.83E-05	0.000453058	UTP4	18	36343222	36373620	+	2462	protein_coding	UTP4, small subunit processome component [Source:VGNC Symbol;Acc:VGNC:36747]	-
ENSBTAG00000004257	140.5611907	136.9507677	141.8894162	81.45812424	72.98481164	64.23443858	139.8004582	72.89245815	0.940200744	3.84E-05	0.000453277	TAF4B	24	30501605	30607271	-	2760	protein_coding	Bos taurus TATA-box binding protein associated factor 4b (TAF4B), mRNA. [Source:RefSeq mRNA;Acc:NM_001205844]	-
ENSBTAG00000014724	4970.124919	4903.237341	5207.147206	6655.430447	6754.136111	9720.811705	5026.836489	7710.126088	-0.61713504	3.85E-05	0.000454022	EIF4A2	1	80467443	80473754	-	2093	protein_coding	Bos taurus eukaryotic translation initiation factor 4A2 (EIF4A2), mRNA. [Source:RefSeq mRNA;Acc:NM_001034044]	DEAD
ENSBTAG00000005373	27415.37139	26754.3821	26996.89105	21415.44143	21090.58321	21664.52428	27055.54818	21390.18297	0.338973425	3.87E-05	0.000456207	TPM1	10	46993261	47022836	-	5238	protein_coding	Bos taurus tropomyosin 1 (TPM1), mRNA. [Source:RefSeq mRNA;Acc:NM_001013590]	-
ENSBTAG00000032166	457.3188035	408.8530219	470.3731332	721.0552479	574.7553917	775.6795083	445.5149862	690.4967159	-0.632272106	3.91E-05	0.000460767	GTPBP10	4	74533033	74559891	+	1655	protein_coding	Bos taurus GTP binding protein 10 (GTPBP10), mRNA. [Source:RefSeq mRNA;Acc:NM_001080314]	-
ENSBTAG00000050789	19.7973508	12.99532832	49.56411114	50.28279274	100.354116	211.1950481	27.45226342	120.6106523	-2.1342736	3.92E-05	0.000461856	-	22	43393705	43393946	+	171	pseudogene	-	-
novel.86	776.0561514	811.7081999	1073.889075	1325.454417	1351.232693	1333.351225	887.2178087	1336.679445	-0.591123001	3.92E-05	0.000461856	-	10	11406706	11410204	+	3499	-	-	-
novel.1600	63.35152257	50.98167266	42.76119393	125.7069818	106.4361836	106.0841486	52.36479638	112.742438	-1.106720288	3.93E-05	0.000461919	-	7	2496067	2499625	-	3559	-	PF00078:Reverse transcriptase (RNA-dependent DNA polymerase)	RVT_1
ENSBTAG00000030960	192.0343028	206.9256125	220.6088869	133.7522287	114.5456072	102.1911523	206.5229341	116.8296627	0.822525275	3.96E-05	0.000465606	DNAJC25	8	101055832	101073360	+	1447	protein_coding	Bos taurus DnaJ heat shock protein family (Hsp40) member C25 (DNAJC25), mRNA. [Source:RefSeq mRNA;Acc:NM_001204995]	DnaJ
ENSBTAG00000008743	703.795821	689.7520418	731.7995234	913.1355161	1009.623228	1151.353649	708.4491287	1024.704131	-0.532587135	3.98E-05	0.000467814	ALDH2	17	62300435	62326158	-	2041	protein_coding	Bos taurus aldehyde dehydrogenase 2 family member (ALDH2), mRNA. [Source:RefSeq mRNA;Acc:NM_001075367]	Aldedh
ENSBTAG00000007759	219.7505939	219.9209409	202.1438258	135.7635404	125.6960645	90.51216345	213.9384535	117.3239228	0.867567504	3.99E-05	0.0004679	ABCB8	4	113605321	113623176	+	3769	protein_coding	ATP binding cassette subfamily B member 8 [Source:VGNC Symbol;Acc:VGNC:25466]	ABC_membrane
ENSBTAG00000022632	353.3827118	365.8684743	388.7381266	518.9184211	534.2082741	566.4309584	369.3297709	539.8525512	-0.547674338	4.01E-05	0.000470462	TCTA	22	50697897	50700780	-	1564	protein_coding	Bos taurus T cell leukemia translocation altered (TCTA), mRNA. [Source:RefSeq mRNA;Acc:NM_001034789]	-
ENSBTAG00000008646	66.32112519	92.96657955	83.57869722	130.7352611	159.1474365	248.1785127	80.95546732	179.3537368	-1.148367778	4.03E-05	0.000471607	TRMT112	29	42611757	42613078	-	992	protein_coding	tRNA methyltransferase subunit 11-2 [Source:NCBI gene;Acc:507833]	-
ENSBTAG00000005997	1226.445882	1220.561222	1278.948437	910.1185486	955.8982969	872.0311662	1241.98518	912.6826706	0.444607264	4.06E-05	0.000475125	-	4	32880212	32982260	+	4808	protein_coding	-	ABC_membrane
ENSBTAG00000018464	463.2580088	506.8178046	436.3585471	678.817702	679.1642194	662.7826162	468.8114535	673.5881792	-0.522996349	4.10E-05	0.000479624	ZDHHC14	9	94011802	94302733	+	2566	protein_coding	Bos taurus zinc finger DHHC-type containing 14 (ZDHHC14), mRNA. [Source:RefSeq mRNA;Acc:NM_001191179]	-
ENSBTAG00000021417	325.6664207	334.8796145	235.1865666	173.9784629	186.5167409	139.1746169	298.5775339	166.5566069	0.842388108	4.10E-05	0.000479624	DMWD	18	53321794	53328419	-	2450	protein_coding	DM1 locus, WD repeat containing [Source:NCBI gene;Acc:790091]	-
ENSBTAG00000000455	1506.578396	1588.428977	1695.870077	2058.577535	2150.01091	2267.670332	1596.95915	2158.752925	-0.434874063	4.11E-05	0.000480109	CREBZF	29	9887736	9893142	+	4319	protein_coding	Bos taurus CREB/ATF bZIP transcription factor (CREBZF), mRNA. [Source:RefSeq mRNA;Acc:NM_001099088]	bZIP_1
ENSBTAG00000000393	408.8152941	367.8677556	414.9779502	584.2860516	552.454477	601.4679249	397.2203333	579.4028178	-0.544594342	4.12E-05	0.000481127	SSPN	5	83676933	83723213	-	1299	protein_coding	sarcospan [Source:VGNC Symbol;Acc:VGNC:35317]	-
ENSBTAG00000052465	1565.970448	1600.424665	1353.780526	1038.842498	1001.513804	598.5481777	1506.725213	879.6348266	0.776649429	4.15E-05	0.000483567	-	9	42992439	42996483	+	761	protein_coding	CD24 molecule [Source:NCBI gene;Acc:767920]	-
ENSBTAG00000020580	319.7272154	309.8885985	214.777815	432.4320176	454.1277169	563.5112112	281.464543	483.3569819	-0.78070004	4.16E-05	0.000485438	TCN1	15	83058088	83073458	-	1520	protein_coding	Bos taurus transcobalamin 1 (TCN1), mRNA. [Source:RefSeq mRNA;Acc:NM_001193105]	-
ENSBTAG00000003490	587.9813188	626.7746815	511.1906365	385.1661924	376.0745155	397.0856203	575.3155456	386.1087761	0.575074418	4.17E-05	0.000485864	ELMO1	4	59867412	60450510	+	5033	protein_coding	Bos taurus engulfment and cell motility 1 (ELMO1), transcript variant 2, mRNA. [Source:RefSeq mRNA;Acc:NM_001024505]	-
novel.467	247.466885	296.8932702	350.8361593	487.7430896	511.9073594	441.8550775	298.3987715	480.5018422	-0.686892033	4.19E-05	0.000487322	-	15	15976793	15981677	+	4885	-	-	-
ENSBTAG00000012881	3022.0656	3021.913656	2742.547483	2314.014122	2094.258623	2145.040949	2928.842246	2184.437898	0.423044185	4.20E-05	0.00048793	EIF4G1	1	82854035	82872768	-	5293	protein_coding	eukaryotic translation initiation factor 4 gamma 1 [Source:VGNC Symbol;Acc:VGNC:28415]	-
ENSBTAG00000021955	2427.155208	2445.121006	2397.542396	3273.409807	3119.08702	4292.028396	2423.27287	3561.508408	-0.555614008	4.20E-05	0.00048793	NPC2	10	85774962	85783794	-	1498	protein_coding	NPC intracellular cholesterol transporter 2 [Source:VGNC Symbol;Acc:VGNC:32196]	-
ENSBTAG00000048740	934.4349578	1025.631297	1041.818179	1366.686307	1334.000168	1768.393559	1000.628145	1489.693345	-0.57425192	4.20E-05	0.00048793	-	5	74439512	74452245	-	1876	protein_coding	apolipoprotein L3-like [Source:NCBI gene;Acc:518495]	-
ENSBTAG00000000942	779.025754	761.7261679	746.3772031	586.2973633	511.9073594	464.2398061	762.376375	520.814843	0.549949669	4.23E-05	0.000490962	SIPA1L2	28	5218869	5463512	-	8247	protein_coding	Bos taurus signal induced proliferation associated 1 like 2 (SIPA1L2), mRNA. [Source:RefSeq mRNA;Acc:NM_001206220]	-
ENSBTAG00000023997	167.2876143	176.9363933	195.3409086	288.6232303	267.610976	435.042334	179.8549721	330.4255135	-0.87789568	4.25E-05	0.000493219	VAMP8	11	49427905	49431079	-	659	protein_coding	Bos taurus vesicle associated membrane protein 8 (VAMP8), mRNA. [Source:RefSeq mRNA;Acc:NM_001034290]	-
ENSBTAG00000050233	637.4746958	631.7728847	682.2354122	936.2656008	869.7356721	905.1216345	650.4943309	903.7076358	-0.474252539	4.26E-05	0.000493219	PRRG1	X	106059230	106203095	+	4410	protein_coding	Bos taurus proline rich and Gla domain 1 (PRRG1), mRNA. [Source:RefSeq mRNA;Acc:NM_001105640]	-
ENSBTAG00000010982	1485.791178	1621.417119	1902.87313	2428.658889	2186.503315	2810.743312	1670.027142	2475.301839	-0.567750437	4.28E-05	0.000495601	UBE2B	7	45944974	45957591	+	673	protein_coding	Bos taurus ubiquitin conjugating enzyme E2 B (UBE2B), mRNA. [Source:RefSeq mRNA;Acc:NM_001037459]	UQ_con
novel.357	324.6765531	354.8724273	328.483717	441.4829203	566.6459682	865.2184227	336.0108992	624.4491037	-0.894416922	4.29E-05	0.000495601	-	13	77858722	77867263	+	769	-	-	-
ENSBTAG00000006526	1356.11853	1419.489709	1331.428084	1067.000862	994.4180586	940.158601	1369.012108	1000.525841	0.452444653	4.29E-05	0.000495601	BCL2L1	13	61220111	61271367	-	2884	protein_coding	Bos taurus BCL2 like 1 (BCL2L1), mRNA. [Source:RefSeq mRNA;Acc:NM_001077486]	-
ENSBTAG00000002462	301.9095997	290.8954263	363.4701484	464.6130049	471.3602418	598.5481777	318.7583915	511.5071415	-0.682340329	4.36E-05	0.000504148	MRPL47	1	87518534	87536139	+	1258	protein_coding	mitochondrial ribosomal protein L47 [Source:VGNC Symbol;Acc:VGNC:31642]	-
ENSBTAG00000005295	1119.540188	1091.607579	820.2374472	632.5575327	673.0821518	378.593888	1010.461738	561.4111908	0.848150814	4.42E-05	0.00051014	SLC35E1	7	6455407	6471362	+	1300	protein_coding	solute carrier family 35 member E1 [Source:VGNC Symbol;Acc:VGNC:34830]	-
novel.695	681.0288676	612.7797125	662.7985059	1061.972583	1168.770664	806.8234785	652.202362	1012.522242	-0.63430808	4.43E-05	0.000510643	-	18	65448539	65459542	-	9828	-	PF17686:Family of unknown function (DUF5534)	-
ENSBTAG00000021435	1457.085019	1459.475335	1532.600064	977.4974909	936.6384161	1191.256861	1483.053473	1035.130923	0.518555639	4.46E-05	0.000514513	MAFF	5	109963621	109972823	+	2231	protein_coding	Bos taurus MAF bZIP transcription factor F (MAFF), mRNA. [Source:RefSeq mRNA;Acc:NM_001103300]	bZIP_Maf
ENSBTAG00000014396	6015.425041	5674.959915	6150.809009	4690.378907	4533.167745	4570.37763	5947.064655	4597.974761	0.371195091	4.47E-05	0.000514965	KLF10	14	61770129	61776507	+	3264	protein_coding	Bos taurus Kruppel like factor 10 (KLF10), mRNA. [Source:RefSeq mRNA;Acc:NM_001168462]	-
ENSBTAG00000000650	497.9033727	627.7743221	514.1061725	348.9625816	383.1702611	269.5899922	546.5946224	333.9076116	0.71139444	4.47E-05	0.000514965	TUBGCP6	5	119589228	119612001	-	5835	protein_coding	tubulin gamma complex associated protein 6 [Source:VGNC Symbol;Acc:VGNC:36516]	-
ENSBTAG00000016502	14.8480131	10.99604704	21.38059696	47.26582517	51.69757491	53.52869882	15.74155237	50.83069963	-1.689289421	4.48E-05	0.000515849	-	29	36224832	36227640	+	2609	protein_coding	-	-
novel.1069	1010.654758	1016.634531	1004.888057	619.4840065	709.5745576	356.2091594	1010.725782	561.7559079	0.847753487	4.49E-05	0.000516442	-	25	558937	569076	+	3773	-	PF05018:Protein of unknown function (DUF667)	-
ENSBTAG00000006828	964.130984	980.6474681	893.1258459	583.2803958	740.9985737	613.1469137	945.9680994	645.8086277	0.550787829	4.50E-05	0.000516442	RAPGEF3	5	32528576	32550135	+	3402	protein_coding	Bos taurus Rap guanine nucleotide exchange factor 3 (RAPGEF3), mRNA. [Source:RefSeq mRNA;Acc:NM_001080302]	cNMP_binding
ENSBTAG00000008433	347.4435066	333.8799739	346.948778	529.9806355	499.7432242	476.892044	342.7574195	502.2053012	-0.550920005	4.51E-05	0.000517692	PGAP2	15	51243181	51264664	-	2275	protein_coding	Bos taurus post-GPI attachment to proteins 2 (PGAP2), mRNA. [Source:RefSeq mRNA;Acc:NM_001099111]	-
ENSBTAG00000002125	125.7131776	150.9457367	140.9175709	243.3687169	240.2416717	218.0077915	139.1921617	233.8727267	-0.748508119	4.51E-05	0.000517692	GNAL	24	42652184	42723588	+	4010	protein_coding	Bos taurus G protein subunit alpha L (GNAL), mRNA. [Source:RefSeq mRNA;Acc:NM_001102554]	G-alpha
ENSBTAG00000021482	1544.193363	1517.454492	1750.293415	2211.437225	2060.807251	2481.785127	1603.980423	2251.343201	-0.489150308	4.52E-05	0.000517732	APH1A	3	20372002	20376143	+	2441	protein_coding	aph-1 homolog A, gamma-secretase subunit [Source:VGNC Symbol;Acc:VGNC:26013]	-
ENSBTAG00000012094	1720.389785	1653.405619	1462.627201	1073.034797	1039.019888	1263.277292	1612.140868	1125.110659	0.518694376	4.52E-05	0.000517732	SCAMP3	3	15376265	15381469	+	2339	protein_coding	secretory carrier membrane protein 3 [Source:VGNC Symbol;Acc:VGNC:34317]	-
ENSBTAG00000012481	1298.706213	1308.529598	1252.708613	932.2429774	1005.568516	855.485932	1286.648141	931.0991418	0.466761121	4.62E-05	0.000528522	RANGAP1	5	112396231	112425046	-	3262	protein_coding	Ran GTPase activating protein 1 [Source:VGNC Symbol;Acc:VGNC:33713]	-
ENSBTAG00000004082	111.855032	84.96945443	114.6777474	236.3291259	141.9149115	303.6537096	103.8340779	227.299249	-1.13057692	4.62E-05	0.000528867	-	6	69404268	69404524	-	255	pseudogene	-	-
ENSBTAG00000008731	2484.567526	2361.151192	2645.362952	3176.866845	3318.781574	3783.019133	2497.027223	3426.222517	-0.45643004	4.65E-05	0.000531332	PRDX3	26	39330323	39339704	-	1648	protein_coding	Bos taurus peroxiredoxin 3 (PRDX3), mRNA. [Source:RefSeq mRNA;Acc:NM_174432]	-
ENSBTAG00000005542	1756.025016	1984.286671	2060.312071	2563.416774	2551.427374	2855.51277	1933.541253	2656.785639	-0.458466054	4.69E-05	0.00053605	EPS15	3	94802846	94942191	+	3395	protein_coding	Bos taurus epidermal growth factor receptor pathway substrate 15 (EPS15), mRNA. [Source:RefSeq mRNA;Acc:NM_001098087]	-
ENSBTAG00000015582	6555.892718	6462.67674	6065.286621	3999.493334	3990.850048	5251.651978	6361.285359	4413.998453	0.527163865	4.83E-05	0.000551078	HMOX1	5	73623293	73630548	+	2489	protein_coding	heme oxygenase 1 [Source:VGNC Symbol;Acc:VGNC:29885]	-
ENSBTAG00000009519	406.835559	393.8584123	482.035277	651.6649939	715.6566253	581.0296944	427.5764161	649.4504379	-0.602621896	4.84E-05	0.000551615	TRIM23	20	13938790	13972833	+	1978	protein_coding	Bos taurus tripartite motif containing 23 (TRIM23), mRNA. [Source:RefSeq mRNA;Acc:NM_001080303]	Arf
ENSBTAG00000019338	7810.054891	7577.276053	8077.978271	10094.77347	9848.89486	10016.67942	7821.769739	9986.782584	-0.352516665	4.85E-05	0.000552496	IL13RA1	X	3168607	3246931	+	3921	protein_coding	Bos taurus interleukin 13 receptor subunit alpha 1 (IL13RA1), mRNA. [Source:RefSeq mRNA;Acc:NM_001206677]	-
ENSBTAG00000008915	8888.020642	9252.673767	9394.828675	11780.25268	11405.90417	12018.65276	9178.507695	11734.93654	-0.354482825	4.85E-05	0.000552723	SF3B1	2	85946152	85984071	-	6357	protein_coding	Bos taurus splicing factor 3b subunit 1 (SF3B1), mRNA. [Source:RefSeq mRNA;Acc:NM_001192994]	-
ENSBTAG00000031625	73.25019797	85.96909507	62.19810026	144.8144431	140.9012336	140.147866	73.80579776	141.9545142	-0.944277948	4.86E-05	0.000552723	HRH3	13	55005743	55010024	+	2290	protein_coding	histamine receptor H3 [Source:VGNC Symbol;Acc:VGNC:29955]	7tm_1
ENSBTAG00000051539	2.96960262	4.998203201	4.859226583	30.16967564	23.31459261	24.33122673	4.275677468	25.93849833	-2.600515761	4.89E-05	0.000556557	-	23	28962193	28967670	+	1922	lncRNA	-	-
ENSBTAG00000006919	1792.650115	2015.275531	2055.452845	2796.728932	2736.930437	2471.079387	1954.459497	2668.246252	-0.4490512	4.92E-05	0.000558571	SMAD4	24	50524995	50577277	+	3556	protein_coding	SMAD family member 4 [Source:VGNC Symbol;Acc:VGNC:34977]	MH2
novel.1736	256.3756929	177.936034	204.0875165	368.0700429	340.5957877	346.4766687	212.7997478	351.7141664	-0.724811801	4.95E-05	0.000561875	-	9	95338674	95346920	+	3603	-	-	-
ENSBTAG00000011971	156.3990713	223.9195034	156.467096	111.6277999	77.0395234	71.04718206	178.9285569	86.57150178	1.047677012	4.95E-05	0.000562136	NRP2	2	94028625	94145404	+	3529	protein_coding	neuropilin 2 [Source:VGNC Symbol;Acc:VGNC:32267]	CUB
ENSBTAG00000010389	269.2439709	239.9137537	249.7642464	341.9229906	410.5395655	485.6512856	252.9739903	412.7046139	-0.706416634	4.96E-05	0.000562358	STBD1	6	91219218	91223003	+	1284	protein_coding	starch binding domain 1 [Source:VGNC Symbol;Acc:VGNC:35376]	-
ENSBTAG00000012790	336.5549636	362.8695524	447.0488456	539.0315382	585.905849	741.6157909	382.1577872	622.1843927	-0.703216221	4.98E-05	0.000564571	TRIAP1	17	62747154	62749467	-	1185	protein_coding	Bos taurus TP53 regulated inhibitor of apoptosis 1 (TRIAP1), mRNA. [Source:RefSeq mRNA;Acc:NM_001079776]	-
ENSBTAG00000003587	611.7381398	526.8106174	533.5430788	397.2340626	326.4042965	216.0612934	557.3639453	313.2332175	0.831890488	5.01E-05	0.00056679	ELL	7	4654732	4732378	+	2989	protein_coding	Bos taurus elongation factor for RNA polymerase II (ELL), mRNA. [Source:RefSeq mRNA;Acc:NM_001192098]	-
ENSBTAG00000006246	425.6430422	359.8706305	339.1740155	224.2612556	234.159604	119.7096355	374.8958961	192.7101651	0.960852311	5.03E-05	0.000569491	CBX5	5	25786249	25812785	+	885	protein_coding	Bos taurus chromobox 5 (CBX5), mRNA. [Source:RefSeq mRNA;Acc:NM_001193213]	Chromo
ENSBTAG00000003415	941.3640306	912.6719046	971.8453166	1229.91711	1362.383151	1964.989871	941.9604173	1519.096711	-0.689612708	5.05E-05	0.000570809	ESD	12	16723868	16741586	-	2194	protein_coding	Bos taurus esterase D (ESD), mRNA. [Source:RefSeq mRNA;Acc:NM_001076065]	-
ENSBTAG00000006099	2602.361763	2638.05165	2575.390089	2039.470074	1986.808761	1998.080339	2605.267834	2008.119725	0.375579391	5.05E-05	0.000570938	PIP5K1A	3	19572074	19611272	-	3772	protein_coding	Bos taurus phosphatidylinositol-4-phosphate 5-kinase type 1 alpha (PIP5K1A), mRNA. [Source:RefSeq mRNA;Acc:NM_001103109]	PIP5K
ENSBTAG00000005265	660.2416492	662.7617445	673.4888044	914.141172	893.0502647	1211.695091	665.4973994	1006.295509	-0.596771202	5.06E-05	0.000571089	ZCCHC9	7	81294847	81304041	+	1390	protein_coding	Bos taurus zinc finger CCHC-type containing 9 (ZCCHC9), mRNA. [Source:RefSeq mRNA;Acc:NM_001101055]	zf-CCHC
ENSBTAG00000054299	35.63523144	28.98957857	47.62042051	114.6447674	94.27204837	71.04718206	37.41507684	93.32133263	-1.316906427	5.09E-05	0.000574103	-	6	61240446	61242820	-	225	protein_coding	-	-
ENSBTAG00000010890	535.5183392	593.7865403	497.5848021	341.9229906	308.1580936	400.9786166	542.2965605	350.3532336	0.629713	5.18E-05	0.000583689	PRMT5	10	21915369	21923670	+	2944	protein_coding	protein arginine methyltransferase 5 [Source:VGNC Symbol;Acc:VGNC:33350]	-
ENSBTAG00000050317	207.8721834	171.9381901	116.621438	96.54296206	58.79332049	67.15418579	165.4772705	74.16348944	1.157698056	5.21E-05	0.000587178	MRPL36	20	70848636	70848938	+	303	protein_coding	mitochondrial ribosomal protein L36 [Source:NCBI gene;Acc:504663]	-
ENSBTAG00000019839	4401.940951	4357.433551	4610.434182	5769.447639	5561.037176	5896.916111	4456.602895	5742.466975	-0.365727028	5.25E-05	0.000591485	LTBP1	11	15473232	15930122	+	6723	protein_coding	latent transforming growth factor beta binding protein 1 [Source:VGNC Symbol;Acc:VGNC:31071]	EGF_CA
ENSBTAG00000013899	2260.857462	2242.193956	2210.948095	1676.42831	1677.63699	1250.625054	2237.999838	1534.896785	0.544224911	5.30E-05	0.000596364	LARP4B	13	46389229	46478656	+	6736	protein_coding	La ribonucleoprotein domain family member 4B [Source:VGNC Symbol;Acc:VGNC:30792]	-
ENSBTAG00000002579	342.4941689	418.8494283	343.0613967	213.1990412	167.25686	258.8842525	368.134998	213.1133846	0.787795142	5.32E-05	0.000597717	FBL	18	49388469	49400788	-	1142	protein_coding	Bos taurus fibrillarin (FBL), mRNA. [Source:RefSeq mRNA;Acc:NM_001205400]	-
novel.1250	93.04754877	101.9633453	115.6495927	192.0802683	179.4209953	177.1313306	103.5534956	182.8775314	-0.820087763	5.33E-05	0.000598495	-	29	36260485	36262777	-	2293	-	-	-
ENSBTAG00000009715	612.7280073	556.7998366	536.4586147	381.143569	418.648989	341.6104234	568.6621529	380.4676604	0.580090239	5.36E-05	0.000601396	PDCD11	26	23987873	24030564	+	7568	protein_coding	programmed cell death 11 [Source:VGNC Symbol;Acc:VGNC:32659]	S1
ENSBTAG00000011074	2082.681304	2231.197909	1947.578014	1565.806166	1463.750945	1598.074972	2087.152409	1542.544027	0.436114191	5.36E-05	0.000601396	BRD2	23	7286988	7294770	+	3029	protein_coding	bromodomain containing 2 [Source:VGNC Symbol;Acc:VGNC:26557]	Bromodomain
ENSBTAG00000009965	2412.307195	2422.129271	2414.063766	3194.968651	3230.591593	4675.488529	2416.166744	3700.349591	-0.615016808	5.37E-05	0.000601526	ECI1	25	1765090	1778389	-	1914	protein_coding	enoyl-CoA delta isomerase 1 [Source:VGNC Symbol;Acc:VGNC:28309]	ECH
ENSBTAG00000014161	867.1239651	877.6844822	989.3385323	1266.120721	1201.208358	1309.019998	911.3823265	1258.783026	-0.465865369	5.37E-05	0.000602207	ARMC10	4	44363508	44428499	+	1761	protein_coding	armadillo repeat containing 10 [Source:VGNC Symbol;Acc:VGNC:50079]	-
ENSBTAG00000011935	206.8823159	196.9292061	213.8059696	326.8381528	386.2112949	290.0282227	205.8724972	334.3592235	-0.699146362	5.40E-05	0.000605077	RASSF6	6	88625427	88682025	-	1048	protein_coding	Ras association domain family member 6 [Source:VGNC Symbol;Acc:VGNC:33762]	RA
ENSBTAG00000025526	1049.259592	1103.603267	926.1685867	722.0609037	731.8754723	512.9022596	1026.343815	655.6128785	0.646846011	5.41E-05	0.000605741	MDC1	23	28304399	28316822	+	5078	protein_coding	mediator of DNA damage checkpoint 1 [Source:VGNC Symbol;Acc:VGNC:31328]	FHA
ENSBTAG00000006881	419.703837	425.8469128	412.0624142	210.1820736	234.159604	316.3059475	419.204388	253.5492084	0.724681356	5.42E-05	0.000605999	SLC35B1	19	36913633	36921556	+	2373	protein_coding	solute carrier family 35 member B1 [Source:VGNC Symbol;Acc:VGNC:34823]	-
ENSBTAG00000002836	190.0545677	226.9184253	172.9884663	95.5373062	117.586641	113.8701411	196.6538198	108.9980294	0.850949061	5.42E-05	0.000605999	TAF3	13	15965644	16086403	-	3287	protein_coding	TATA-box binding protein associated factor 3 [Source:VGNC Symbol;Acc:VGNC:35574]	PHD
ENSBTAG00000021988	438.5113203	414.8508657	509.2469459	326.8381528	274.7067216	218.0077915	454.203044	273.184222	0.73407526	5.44E-05	0.000607343	SOCS4	10	67504612	67518536	+	2213	protein_coding	Bos taurus suppressor of cytokine signaling 4 (SOCS4), mRNA. [Source:RefSeq mRNA;Acc:NM_001076218]	SOCS_box
ENSBTAG00000050417	30.68589374	26.99029729	34.9864314	69.39025398	98.32676013	66.18093672	30.88754081	77.96598361	-1.334558519	5.49E-05	0.000612275	-	5	74480533	74487043	-	1889	protein_coding	apolipoprotein L3 [Source:NCBI gene;Acc:788334]	-
ENSBTAG00000038831	169.2673494	169.9389089	120.5088193	224.2612556	294.9802804	312.4129513	153.2383592	277.2181624	-0.855902	5.51E-05	0.000614826	PHYHD1	11	99424317	99441357	+	1456	protein_coding	Bos taurus phytanoyl-CoA dioxygenase domain containing 1 (PHYHD1), mRNA. [Source:RefSeq mRNA;Acc:NM_001076243]	PhyH
novel.1082	66.32112519	46.98311009	44.70488456	144.8144431	100.354116	106.0841486	52.66970661	117.0842359	-1.152596095	5.60E-05	0.000623909	-	25	25964071	25967450	+	3380	-	-	-
ENSBTAG00000019520	328.6360233	351.8735054	253.6516276	170.9614953	206.7902996	170.3185871	311.3870521	182.6901274	0.769338963	5.61E-05	0.00062443	ZC3H18	18	13834154	13877327	+	3756	protein_coding	zinc finger CCCH-type containing 18 [Source:VGNC Symbol;Acc:VGNC:37104]	-
ENSBTAG00000014750	1245.253365	1253.549363	1125.396877	1608.043712	1616.816313	1638.951433	1208.066535	1621.270486	-0.424517651	5.67E-05	0.000630998	EPB41L4A	10	1518392	1814761	+	4426	protein_coding	Bos taurus erythrocyte membrane protein band 4.1 like 4A (EPB41L4A), mRNA. [Source:RefSeq mRNA;Acc:NM_001105384]	Band_41
novel.1021	31.67576128	46.98311009	46.64857519	100.5655855	77.0395234	116.7898883	41.76914886	98.13166573	-1.232776964	5.70E-05	0.000634246	-	23	30062301	30066934	-	1797	-	-	-
ENSBTAG00000012796	75.22993305	45.98346945	43.73303925	24.13574051	10.13677939	10.70573976	54.98214725	14.99275322	1.875755894	5.72E-05	0.000635794	ZNF428	18	51829180	51838230	-	801	protein_coding	Bos taurus zinc finger protein 428 (ZNF428), mRNA. [Source:RefSeq mRNA;Acc:NM_001192364]	-
ENSBTAG00000013045	409.8051616	400.8558968	373.1886016	215.2103529	212.8723673	295.8677171	394.6165533	241.3168124	0.708747017	5.76E-05	0.000639414	DKC1	X	36210775	36223011	-	2729	protein_coding	dyskerin pseudouridine synthase 1 [Source:VGNC Symbol;Acc:VGNC:28078]	-
ENSBTAG00000007665	232.6188719	208.9248938	200.2001352	130.7352611	131.7781321	87.59241624	213.9146337	116.7019365	0.875186634	5.77E-05	0.000640066	NPR3	20	40918778	40995857	-	4217	protein_coding	natriuretic peptide receptor 3 [Source:HGNC Symbol;Acc:HGNC:7945]	ANF_receptor
ENSBTAG00000000524	2521.192625	2639.05129	2498.614309	3440.348679	3465.764875	5602.994892	2552.952741	4169.702816	-0.707848625	5.79E-05	0.000641935	-	1	143846935	143850428	-	657	protein_coding	-	-
ENSBTAG00000003578	149.4699986	127.954002	130.2272724	51.28844859	63.86171019	83.69941997	135.8837576	66.28319292	1.03440204	5.87E-05	0.000650586	DPCD	26	22334789	22356875	+	855	protein_coding	Bos taurus deleted in primary ciliary dyskinesia homolog (DPCD), mRNA. [Source:RefSeq mRNA;Acc:NM_001075745]	-
ENSBTAG00000004613	161.348409	188.932081	178.8195382	320.8042177	237.2006378	383.4601333	176.3666761	313.8216629	-0.831876832	5.91E-05	0.000654282	CSGALNACT1	27	37958250	38233860	+	4182	protein_coding	Bos taurus chondroitin sulfate N-acetylgalactosaminyltransferase 1 (CSGALNACT1), mRNA. [Source:RefSeq mRNA;Acc:NM_001102116]	-
ENSBTAG00000031217	302.8994673	256.9076446	278.9196059	385.1661924	456.1550728	825.3152108	279.5755726	555.545492	-0.990983246	6.00E-05	0.000663945	MYL6B	5	57165321	57168025	-	750	protein_coding	myosin light chain 6B [Source:VGNC Symbol;Acc:VGNC:31803]	-
ENSBTAG00000008186	448.4099957	438.8422411	390.6818173	586.2973633	609.2204416	805.8502294	425.978018	667.1226781	-0.647570583	6.02E-05	0.000665723	UBXN6	7	19663055	19674553	+	1355	protein_coding	Bos taurus UBX domain protein 6 (UBXN6), mRNA. [Source:RefSeq mRNA;Acc:NM_001045986]	UBX
ENSBTAG00000011950	1196.749856	1285.537863	1184.679441	854.8074766	896.0912985	590.7621851	1222.322387	780.5536534	0.647326559	6.07E-05	0.000670633	EMC1	2	133406871	133434408	+	3454	protein_coding	ER membrane protein complex subunit 1 [Source:VGNC Symbol;Acc:VGNC:28461]	-
ENSBTAG00000024075	56.42244979	60.97807906	55.39518304	8.045246838	12.16413527	28.22422301	57.59857063	16.14453504	1.830372515	6.07E-05	0.000670633	SLC9A4	11	7241330	7296376	+	2905	protein_coding	solute carrier family 9 member A4 [Source:VGNC Symbol;Acc:VGNC:34943]	Na_H_Exchanger
ENSBTAG00000053057	0	5.997843842	3.887381266	28.15836393	23.31459261	25.3044758	3.295075036	25.59247745	-2.958668831	6.10E-05	0.000672611	-	27	7220613	7228081	+	731	protein_coding	-	-
ENSBTAG00000001906	334.5752285	300.8918327	301.2720481	199.1198592	214.8997232	165.4523418	312.2463698	193.1573081	0.693500688	6.18E-05	0.000680894	FANCA	18	14606881	14644928	-	4884	protein_coding	Bos taurus FA complementation group A (FANCA), mRNA. [Source:RefSeq mRNA;Acc:NM_001206603]	-
ENSBTAG00000032187	402.8760888	465.8325384	412.0624142	273.5383925	270.6520098	147.9338585	426.9236805	230.708087	0.888604648	6.23E-05	0.000686434	ZNF697	3	23660109	23691442	+	1858	protein_coding	zinc finger protein 697 [Source:VGNC Symbol;Acc:VGNC:37331]	-
ENSBTAG00000032372	72.26033043	95.96550147	85.52238786	31.1753315	42.57447346	35.0369665	84.58273992	36.26225715	1.222225947	6.40E-05	0.000704721	HASPIN	19	24398955	24401936	+	2982	protein_coding	Bos taurus histone H3 associated protein kinase (HASPIN), mRNA. [Source:RefSeq mRNA;Acc:NM_001076544]	-
ENSBTAG00000002770	2202.455277	2285.178504	2352.837511	3026.018467	2863.640179	3020.965111	2280.157097	2970.207919	-0.381434013	6.41E-05	0.000704952	TCN2	17	69579507	69597093	+	3898	protein_coding	transcobalamin 2 [Source:VGNC Symbol;Acc:VGNC:35699]	-
ENSBTAG00000037746	255.3858253	260.9062071	245.8768651	357.0078284	384.1839391	550.8589733	254.0562992	430.6835803	-0.761975261	6.41E-05	0.000705034	SNRNP27	11	68242066	68249964	+	836	protein_coding	Bos taurus small nuclear ribonucleoprotein U4/U6.U5 subunit 27 (SNRNP27), mRNA. [Source:RefSeq mRNA;Acc:NM_001098162]	-
novel.629	41.57443668	41.98490689	32.07089545	86.48640351	80.08055722	93.43191066	38.54341301	86.66629046	-1.170013154	6.51E-05	0.000715311	-	18	43155833	43160378	+	2666	-	-	-
ENSBTAG00000052790	60.38191995	48.98239137	81.63500659	114.6447674	124.6823866	193.6765648	63.6664393	144.3345729	-1.180679387	6.53E-05	0.000716523	-	23	16531639	16534799	-	318	protein_coding	-	-
ENSBTAG00000013824	906.7186667	976.6489056	854.2520333	651.6649939	682.2052533	627.7456497	912.5398685	653.8719656	0.480897947	6.53E-05	0.000716777	WWC3	X	132631819	132741312	-	6045	protein_coding	WWC family member 3 [Source:VGNC Symbol;Acc:VGNC:36976]	WW
ENSBTAG00000021130	524.6297962	572.7940869	429.5556299	343.9343023	340.5957877	280.295732	508.993171	321.6086073	0.662482042	6.59E-05	0.000722134	MFSD10	6	115807625	115811707	+	2161	protein_coding	Bos taurus major facilitator superfamily domain containing 10 (MFSD10), mRNA. [Source:RefSeq mRNA;Acc:NM_001075304]	MFS_1
ENSBTAG00000005034	1807.498128	1826.34345	1685.179779	2415.585363	2462.223715	2211.221886	1773.007119	2363.010321	-0.414404818	6.60E-05	0.000723639	CAPN5	15	56472805	56530219	+	5578	protein_coding	Bos taurus calpain 5 (CAPN5), mRNA. [Source:RefSeq mRNA;Acc:NM_001192894]	Peptidase_C2
ENSBTAG00000004238	1279.898729	1265.545051	1155.524081	795.4737811	884.9408411	478.8385421	1233.655954	719.7510548	0.777656029	6.71E-05	0.000734896	TACC1	27	33879871	34006043	+	2829	protein_coding	transforming acidic coiled-coil containing protein 1 [Source:VGNC Symbol;Acc:VGNC:35557]	-
ENSBTAG00000007196	20.78721834	8.996765763	34.9864314	1.005655855	2.027355879	1.946498139	21.5901385	1.659836624	3.701086568	6.83E-05	0.000746758	TAGLN	15	27888817	27894507	+	1546	protein_coding	transgelin [Source:VGNC Symbol;Acc:VGNC:35585]	CH
ENSBTAG00000005708	1127.459128	1140.589971	1305.18826	839.7226387	910.2827896	807.7967276	1191.07912	852.6007187	0.482527736	6.89E-05	0.000753691	KIF20B	26	11351677	11435642	+	5794	protein_coding	Bos taurus kinesin family member 20B (KIF20B), mRNA. [Source:RefSeq mRNA;Acc:NM_001105258]	Kinesin
novel.1655	278.1527788	237.9144724	299.3283575	458.5790698	402.430142	400.9786166	271.7985362	420.6626094	-0.62976113	6.98E-05	0.000762739	-	8	10140657	10147834	+	7178	-	-	-
ENSBTAG00000044048	256.3756929	242.9126756	225.4681134	373.0983221	348.7052112	378.593888	241.585494	366.7991404	-0.602720771	7.00E-05	0.000764188	LMBR1L	5	30713730	30726323	+	2364	protein_coding	limb development membrane protein 1 like [Source:VGNC Symbol;Acc:VGNC:30923]	-
ENSBTAG00000007424	633.5152257	638.7703692	616.1499307	441.4829203	470.3465639	366.9148992	629.4785085	426.2481278	0.562841893	7.04E-05	0.000768214	LIF	17	69262954	69269513	-	2585	protein_coding	LIF, interleukin 6 family cytokine [Source:VGNC Symbol;Acc:VGNC:30880]	-
ENSBTAG00000001109	284.091984	274.9011761	335.2866342	480.7034986	399.3891081	551.8322223	298.0932648	477.3082764	-0.679247421	7.12E-05	0.000776727	MRPS14	16	56248846	56268263	-	622	protein_coding	Bos taurus mitochondrial ribosomal protein S14 (MRPS14), mRNA. [Source:RefSeq mRNA;Acc:NM_001003902]	Ribosomal_S14
ENSBTAG00000046974	114.8246347	145.9475335	182.7069195	226.2725673	263.5562643	360.1021557	147.8263625	283.3103291	-0.938549289	7.16E-05	0.000779809	-	19	12320291	12322598	-	789	protein_coding	-	-
novel.794	241.5276798	259.9065665	263.3700808	519.9240769	452.100361	324.0919401	254.9347757	432.0387927	-0.760636664	7.17E-05	0.000780633	-	2	5482429	5489991	+	7563	-	PF00078:Reverse transcriptase (RNA-dependent DNA polymerase)	RVT_1
[truncated: 1,073 more rows]
