# Supplementary material
Source: MDPI journal article supplement (https://www.mdpi.com/2077-0472/13/1/117)
Supplement: s1 [file s1 › Table S5.xlsx]

## Sheet: Sheet1
KEGGID	Description	GeneRatio	BgRatio	pvalue	padj	geneID	geneName	keggID	Count	Up	Up_Gene_names	Down	Down_Gene_names
bta04218	Cellular senescence	74/1645	168/7030	1.90278e-09	6.08889e-07	ENSBTAG00000014921/ENSBTAG00000019716/ENSBTAG00000014465/ENSBTAG00000008353/ENSBTAG00000007783/ENSBTAG00000008409/ENSBTAG00000010422/ENSBTAG00000015875/ENSBTAG00000004906/ENSBTAG00000011905/ENSBTAG00000010576/ENSBTAG00000003994/ENSBTAG00000007075/ENSBTAG00000002341/ENSBTAG00000010546/ENSBTAG00000003971/ENSBTAG00000051975/ENSBTAG00000019386/ENSBTAG00000025434/ENSBTAG00000017514/ENSBTAG00000020116/…	IL6/CXCL8/SERPINE1/CDKN1A/MYBL2/MYC/MDM2/FOXM1/CCNE2/RRAS2/MAP2K3/IGFBP3/-/ETS1/LIN54/E2F1/-/BOLA-NC1/ZFP36L1/CCND1/JSP.1/ITPR1/CALM3/CHEK1/PIK3R2/CDC25A/HIPK2/CCND3/CALM1/MAPKAPK2/RB1/-/RBL1/CCNA2/E2F4/CCNB1/PPP1CB/E2F2/MTOR/LIN52/CAPN1/MRAS/VDAC2/-/NBN/CDK1/SLC25A4/EIF4EBP1/NFATC2/MAPK12/MAPK1/TGFB1/TGFB3/CCNB3/-/MAP2K6/PPP3R1/MAPK11/BoLA/PIK3R1/NFATC3/KRAS/PPP3CA/SMAD3/LIN37/RAD9A/-/-/IL1A/RAD…	bta:280826/bta:280828/bta:281375/bta:513497/bta:510420/bta:511077/bta:540378/bta:513643/bta:538436/bta:519269/bta:516039/bta:282261/bta:533049/bta:540313/bta:100139053/bta:535369/bta:540378/bta:510417/bta:614773/bta:524530/bta:407173/bta:317697/bta:520277/bta:513678/bta:282308/bta:520188/bta:512233/bta:540547/bta:520277/bta:788091/bta:534712/bta:407173/bta:524870/bta:281667/bta:525428/bta:327679/…	74	53	ENSBTAG00000014921/ENSBTAG00000019716/ENSBTAG00000014465/ENSBTAG00000008353/ENSBTAG00000007783/ENSBTAG00000008409/ENSBTAG00000010422/ENSBTAG00000015875/ENSBTAG00000004906/ENSBTAG00000011905/ENSBTAG00000010576/ENSBTAG00000003994/ENSBTAG00000002341/ENSBTAG00000010546/ENSBTAG00000003971/ENSBTAG00000051975/ENSBTAG00000025434/ENSBTAG00000017514/ENSBTAG00000020455/ENSBTAG00000014583/ENSBTAG00000017582/…	21	ENSBTAG00000007075/ENSBTAG00000019386/ENSBTAG00000020116/ENSBTAG00000010106/ENSBTAG00000005146/ENSBTAG00000012447/ENSBTAG00000010230/ENSBTAG00000012975/ENSBTAG00000038619/ENSBTAG00000013225/ENSBTAG00000012004/ENSBTAG00000012208/ENSBTAG00000001609/ENSBTAG00000010619/ENSBTAG00000005182/ENSBTAG00000009778/novel.990/ENSBTAG00000010349/ENSBTAG00000015591/ENSBTAG00000006366/ENSBTAG00000013113
bta05167	Kaposi sarcoma-associated herpesvirus infection	71/1645	187/7030	4.31231e-06	0.00068997	ENSBTAG00000014921/ENSBTAG00000019716/ENSBTAG00000037558/ENSBTAG00000008353/ENSBTAG00000037778/ENSBTAG00000008409/ENSBTAG00000017280/ENSBTAG00000004322/ENSBTAG00000022613/ENSBTAG00000007075/ENSBTAG00000007867/ENSBTAG00000003971/ENSBTAG00000008703/ENSBTAG00000019386/ENSBTAG00000000428/ENSBTAG00000019966/ENSBTAG00000017514/ENSBTAG00000002472/ENSBTAG00000020116/ENSBTAG00000001570/ENSBTAG00000020455/…	IL6/CXCL8/GRO1/CDKN1A/-/MYC/C3/FOS/CYCS/-/STAT1/E2F1/EIF2AK2/BOLA-NC1/BAK1/TICAM1/CCND1/CASP9/JSP.1/CSF2/ITPR1/GABARAPL1/CALM3/PIK3R2/GNG11/JUN/CALM1/MAPKAPK2/RB1/-/VEGFA/IRF9/RCAN1/CASP8/GABARAP/E2F2/MTOR/GNG5/-/IRF7/NFATC2/PDGFB/TNFRSF1A/MAPK12/ATG14/MAPK1/GSK3beta/-/MAP2K6/PPP3R1/ICAM1/GABARAPL2/MAPK11/ZFP36/BoLA/PIK3R1/NFATC3/KRAS/PPP3CA/FADD/GNG10/TRAF3/-/PREX1/UBC/CREB1/LYN/CASP3/GNB5/NFATC…	bta:280826/bta:280828/bta:281212/bta:513497/bta:613667/bta:511077/bta:280677/bta:280795/bta:510767/bta:533049/bta:510814/bta:535369/bta:347700/bta:510417/bta:514090/bta:510427/bta:524530/bta:100140945/bta:407173/bta:281095/bta:317697/bta:338472/bta:520277/bta:282308/bta:511812/bta:280831/bta:520277/bta:788091/bta:534712/bta:407173/bta:281572/bta:509855/bta:539640/bta:507481/bta:327715/bta:617024/…	71	40	ENSBTAG00000014921/ENSBTAG00000019716/ENSBTAG00000037558/ENSBTAG00000008353/ENSBTAG00000037778/ENSBTAG00000008409/ENSBTAG00000004322/ENSBTAG00000022613/ENSBTAG00000003971/ENSBTAG00000000428/ENSBTAG00000019966/ENSBTAG00000017514/ENSBTAG00000001570/ENSBTAG00000020455/ENSBTAG00000014583/ENSBTAG00000002350/ENSBTAG00000004037/ENSBTAG00000025644/ENSBTAG00000038107/ENSBTAG00000006640/ENSBTAG00000005339/…	31	ENSBTAG00000017280/ENSBTAG00000007075/ENSBTAG00000007867/ENSBTAG00000008703/ENSBTAG00000019386/ENSBTAG00000002472/ENSBTAG00000020116/ENSBTAG00000011765/ENSBTAG00000000820/ENSBTAG00000005146/ENSBTAG00000005816/ENSBTAG00000020035/ENSBTAG00000015718/ENSBTAG00000014883/ENSBTAG00000008122/ENSBTAG00000038619/ENSBTAG00000047680/ENSBTAG00000021697/ENSBTAG00000004211/ENSBTAG00000010795/ENSBTAG00000012208/…
bta04110	Cell cycle	55/1645	139/7030	1.28801e-05	0.00137388	ENSBTAG00000017021/ENSBTAG00000008353/ENSBTAG00000014380/ENSBTAG00000008409/ENSBTAG00000010422/ENSBTAG00000010721/ENSBTAG00000015595/ENSBTAG00000010384/ENSBTAG00000004906/ENSBTAG00000024874/ENSBTAG00000021181/ENSBTAG00000008934/ENSBTAG00000015172/ENSBTAG00000003971/ENSBTAG00000051975/ENSBTAG00000014453/ENSBTAG00000007237/ENSBTAG00000005456/ENSBTAG00000017514/ENSBTAG00000017582/ENSBTAG00000009586/…	MCM4/CDKN1A/MCM2/MYC/MDM2/MCM3/MCM5/CDC6/CCNE2/MAD2L1/BUB1/ESPL1/MCM6/E2F1/-/PLK1/BUB1B/TTK/CCND1/CHEK1/CDC25A/SMC1A/CCND3/PCNA/RB1/RBL1/CCNA2/E2F4/SMAD4/CCNB1/CDC23/E2F2/CDKN1B/PKMYT1/BUB3/-/CDK1/SKP2/TGFB1/ORC1/CDC14B/CDC45/GSK3beta/TGFB3/CCNB3/-/ORC2/CDKN2C/SMAD3/ABL1/CDC20/ANAPC13/MAD1L1/ANAPC1/CDC26	bta:504367/bta:513497/bta:510120/bta:511077/bta:540378/bta:281302/bta:506970/bta:515301/bta:538436/bta:337870/bta:514777/bta:506740/bta:517812/bta:535369/bta:540378/bta:538238/bta:537027/bta:524925/bta:524530/bta:513678/bta:520188/bta:282370/bta:540547/bta:515499/bta:534712/bta:524870/bta:281667/bta:525428/bta:540248/bta:327679/bta:512651/bta:617024/bta:512613/bta:522613/bta:539594/bta:615512/bta…	55	44	ENSBTAG00000017021/ENSBTAG00000008353/ENSBTAG00000014380/ENSBTAG00000008409/ENSBTAG00000010422/ENSBTAG00000010721/ENSBTAG00000015595/ENSBTAG00000010384/ENSBTAG00000004906/ENSBTAG00000024874/ENSBTAG00000021181/ENSBTAG00000008934/ENSBTAG00000015172/ENSBTAG00000003971/ENSBTAG00000051975/ENSBTAG00000014453/ENSBTAG00000007237/ENSBTAG00000005456/ENSBTAG00000017514/ENSBTAG00000017582/ENSBTAG00000009586/…	11	ENSBTAG00000010106/ENSBTAG00000006919/ENSBTAG00000018254/novel.516/ENSBTAG00000011589/ENSBTAG00000012004/ENSBTAG00000053583/ENSBTAG00000031473/ENSBTAG00000011059/ENSBTAG00000014461/ENSBTAG00000014430
bta04612	Antigen processing and presentation	33/1645	77/7030	0.000114894	0.00640631	ENSBTAG00000015228/ENSBTAG00000048782/ENSBTAG00000037605/ENSBTAG00000017135/ENSBTAG00000012451/ENSBTAG00000010645/ENSBTAG00000012330/ENSBTAG00000019588/ENSBTAG00000013919/ENSBTAG00000007075/ENSBTAG00000017077/ENSBTAG00000019386/ENSBTAG00000021395/ENSBTAG00000015730/ENSBTAG00000015683/ENSBTAG00000020116/ENSBTAG00000009656/ENSBTAG00000030744/ENSBTAG00000019918/ENSBTAG00000005146/ENSBTAG00000013162/…	CD74/-/BOLA-DQA1/CTSS/BOLA-DMB/BOLA-DRA/B2M/BLA-DQB/-/-/CTSL2/BOLA-NC1/PSME1/HLA-DMA/HSPA4/JSP.1/-/NFYB/PSME3/-/HSPA8/-/PSME2/RFXAP/-/-/CTSB/BoLA/-/CREB1/LGMN/-/BOLA-DQA5	bta:613384/bta:280729/bta:100848815/bta:327711/bta:282491/bta:506214/bta:280729/bta:539241/bta:282530/bta:533049/bta:281108/bta:510417/bta:510041/bta:282490/bta:536558/bta:407173/bta:282535/bta:614382/bta:100336105/bta:407173/bta:281831/bta:512672/bta:509857/bta:540760/bta:281832/bta:507917/bta:281105/bta:533050/bta:767904/bta:281713/bta:281281/bta:100336105/bta:282494	33	8	ENSBTAG00000015683/ENSBTAG00000030744/ENSBTAG00000019918/ENSBTAG00000013162/ENSBTAG00000005351/ENSBTAG00000051519/ENSBTAG00000005474/ENSBTAG00000054766	25	ENSBTAG00000015228/ENSBTAG00000048782/ENSBTAG00000037605/ENSBTAG00000017135/ENSBTAG00000012451/ENSBTAG00000010645/ENSBTAG00000012330/ENSBTAG00000019588/ENSBTAG00000013919/ENSBTAG00000007075/ENSBTAG00000017077/ENSBTAG00000019386/ENSBTAG00000021395/ENSBTAG00000015730/ENSBTAG00000020116/ENSBTAG00000009656/ENSBTAG00000005146/ENSBTAG00000038619/ENSBTAG00000005814/ENSBTAG00000012208/ENSBTAG00000012442/…
bta05323	Rheumatoid arthritis	39/1645	96/7030	0.000117663	0.00640631	ENSBTAG00000014921/ENSBTAG00000019716/ENSBTAG00000037558/novel.655/ENSBTAG00000021326/ENSBTAG00000037778/ENSBTAG00000001321/ENSBTAG00000037605/ENSBTAG00000010620/ENSBTAG00000004322/ENSBTAG00000006240/ENSBTAG00000012451/ENSBTAG00000010645/ENSBTAG00000019588/ENSBTAG00000013919/ENSBTAG00000017077/ENSBTAG00000000283/ENSBTAG00000017060/ENSBTAG00000011563/ENSBTAG00000015730/ENSBTAG00000001570/ENSBTAG00…	IL6/CXCL8/GRO1/-/CCL20/-/IL1B/BOLA-DQA1/ATP6V1B1/FOS/TLR4/BOLA-DMB/BOLA-DRA/BLA-DQB/-/CTSL2/CSF1/ITGB2/TNFSF13B/HLA-DMA/CSF2/-/ATP6V0B/-/JUN/VEGFA/MMP1/CTSK/-/TGFB1/TGFB3/ATP6V1G1/ICAM1/ATP6V0A4/ATP6V1H/IL1A/IL23A/ATP6V1B2/BOLA-DQA5	bta:280826/bta:280828/bta:281212/bta:100337295/bta:281666/bta:613667/bta:281251/bta:100848815/bta:338059/bta:280795/bta:281536/bta:282491/bta:506214/bta:539241/bta:282530/bta:281108/bta:281094/bta:281877/bta:504507/bta:282490/bta:281095/bta:282535/bta:505684/bta:112441463/bta:280831/bta:281572/bta:112441463/bta:513038/bta:550622/bta:282089/bta:538957/bta:281641/bta:281839/bta:518974/bta:282657/bt…	39	17	ENSBTAG00000014921/ENSBTAG00000019716/ENSBTAG00000037558/novel.655/ENSBTAG00000021326/ENSBTAG00000037778/ENSBTAG00000001321/ENSBTAG00000004322/ENSBTAG00000000283/ENSBTAG00000001570/ENSBTAG00000015818/ENSBTAG00000004037/ENSBTAG00000005339/ENSBTAG00000048029/ENSBTAG00000050859/ENSBTAG00000020457/ENSBTAG00000010303	22	ENSBTAG00000037605/ENSBTAG00000010620/ENSBTAG00000006240/ENSBTAG00000012451/ENSBTAG00000010645/ENSBTAG00000019588/ENSBTAG00000013919/ENSBTAG00000017077/ENSBTAG00000017060/ENSBTAG00000011563/ENSBTAG00000015730/ENSBTAG00000009656/ENSBTAG00000018889/ENSBTAG00000021035/ENSBTAG00000012004/ENSBTAG00000000203/ENSBTAG00000004263/ENSBTAG00000003450/ENSBTAG00000010349/ENSBTAG00000004378/ENSBTAG00000018646/…
bta05166	Human T-cell leukemia virus 1 infection	80/1645	237/7030	0.000150054	0.00640631	ENSBTAG00000014921/ENSBTAG00000010069/ENSBTAG00000008353/ENSBTAG00000006194/ENSBTAG00000008409/ENSBTAG00000048782/ENSBTAG00000037605/ENSBTAG00000004906/ENSBTAG00000004322/ENSBTAG00000012451/ENSBTAG00000010645/ENSBTAG00000012330/ENSBTAG00000019588/ENSBTAG00000000746/ENSBTAG00000013919/ENSBTAG00000013790/ENSBTAG00000007075/ENSBTAG00000002341/ENSBTAG00000024874/ENSBTAG00000017060/ENSBTAG00000008934/…	IL6/EGR1/CDKN1A/FOSL1/MYC/-/BOLA-DQA1/CCNE2/FOS/BOLA-DMB/BOLA-DRA/B2M/BLA-DQB/KAT2B/-/MAP3K1/-/ETS1/MAD2L1/ITGB2/ESPL1/E2F1/BUB1B/BOLA-NC1/NRP1/CRTC2/CCND1/HLA-DMA/JSP.1/CSF2/CHEK1/CD40/PIK3R2/-/SLC2A1/CCND3/ADCY6/NFYB/JUN/RB1/-/NFKB2/GPS2/CCNA2/BCL2L1/SMAD4/CDC23/E2F2/BUB3/RANBP1/RELB/VDAC2/-/SLC25A4/NFATC2/TNFRSF1A/MAPK1/TGFB1/TGFB3/-/PPP3R1/ICAM1/ZFP36/CDKN2C/BoLA/PIK3R1/NFATC3/KRAS/PPP3CA/SMA…	bta:280826/bta:407125/bta:513497/bta:531389/bta:511077/bta:280729/bta:100848815/bta:538436/bta:280795/bta:282491/bta:506214/bta:280729/bta:539241/bta:407215/bta:282530/bta:523962/bta:533049/bta:540313/bta:337870/bta:281877/bta:506740/bta:535369/bta:537027/bta:510417/bta:539369/bta:540959/bta:524530/bta:282490/bta:407173/bta:281095/bta:513678/bta:286849/bta:282308/bta:282535/bta:282356/bta:540547/…	80	46	ENSBTAG00000014921/ENSBTAG00000010069/ENSBTAG00000008353/ENSBTAG00000006194/ENSBTAG00000008409/ENSBTAG00000004906/ENSBTAG00000004322/ENSBTAG00000002341/ENSBTAG00000024874/ENSBTAG00000008934/ENSBTAG00000003971/ENSBTAG00000007237/ENSBTAG00000017942/ENSBTAG00000017514/ENSBTAG00000001570/ENSBTAG00000017582/ENSBTAG00000020736/ENSBTAG00000002350/ENSBTAG00000009617/ENSBTAG00000030744/ENSBTAG00000004037/…	34	ENSBTAG00000048782/ENSBTAG00000037605/ENSBTAG00000012451/ENSBTAG00000010645/ENSBTAG00000012330/ENSBTAG00000019588/ENSBTAG00000000746/ENSBTAG00000013919/ENSBTAG00000013790/ENSBTAG00000007075/ENSBTAG00000017060/ENSBTAG00000019386/ENSBTAG00000019866/ENSBTAG00000015730/ENSBTAG00000020116/ENSBTAG00000009656/ENSBTAG00000010106/ENSBTAG00000005464/ENSBTAG00000005146/ENSBTAG00000006919/ENSBTAG00000012975/…
bta05169	Epstein-Barr virus infection	74/1645	216/7030	0.000156364	0.00640631	ENSBTAG00000014921/ENSBTAG00000000436/ENSBTAG00000053807/ENSBTAG00000039861/ENSBTAG00000008353/ENSBTAG00000014707/ENSBTAG00000003366/ENSBTAG00000008409/ENSBTAG00000010422/ENSBTAG00000048782/ENSBTAG00000037605/ENSBTAG00000037527/ENSBTAG00000004028/ENSBTAG00000004906/ENSBTAG00000012451/ENSBTAG00000022613/ENSBTAG00000010645/ENSBTAG00000010576/ENSBTAG00000012330/ENSBTAG00000019588/ENSBTAG00000013919/…	IL6/TNFAIP3/-/OAS1Y/CDKN1A/ISG15/DDX58/MYC/MDM2/-/BOLA-DQA1/OAS1Z/POLK/CCNE2/BOLA-DMB/CYCS/BOLA-DRA/MAP2K3/B2M/BLA-DQB/-/-/STAT1/OAS2/IRAK4/E2F1/-/EIF2AK2/BOLA-NC1/BAK1/CCND1/HLA-DMA/CASP9/JSP.1/CD40/PIK3R2/-/CCND3/JUN/RB1/-/PSMD11/NFKB2/IRAK1/IRF9/CCNA2/ADRM1/CASP8/VIM/E2F2/CDKN1B/APAF1/RELB/PSMD8/-/IRF7/MAPK12/SKP2/-/MAP2K6/ICAM1/USP7/MAPK11/CD44/BoLA/PIK3R1/FADD/TRAF3/BLNK/-/PSMD13/LYN/CASP3/B…	bta:280826/bta:508105/bta:347699/bta:654488/bta:513497/bta:281871/bta:504760/bta:511077/bta:540378/bta:280729/bta:100848815/bta:519922/bta:541218/bta:538436/bta:282491/bta:510767/bta:506214/bta:516039/bta:280729/bta:539241/bta:282530/bta:533049/bta:510814/bta:529660/bta:533692/bta:535369/bta:540378/bta:347700/bta:510417/bta:514090/bta:524530/bta:282490/bta:100140945/bta:407173/bta:286849/bta:2823…	74	35	ENSBTAG00000014921/ENSBTAG00000000436/ENSBTAG00000008353/ENSBTAG00000008409/ENSBTAG00000010422/ENSBTAG00000004028/ENSBTAG00000004906/ENSBTAG00000022613/ENSBTAG00000010576/ENSBTAG00000003971/ENSBTAG00000051975/ENSBTAG00000000428/ENSBTAG00000017514/ENSBTAG00000020736/ENSBTAG00000002350/ENSBTAG00000004037/ENSBTAG00000006640/ENSBTAG00000018897/ENSBTAG00000006017/ENSBTAG00000016085/ENSBTAG00000004943/…	39	ENSBTAG00000053807/ENSBTAG00000039861/ENSBTAG00000014707/ENSBTAG00000003366/ENSBTAG00000048782/ENSBTAG00000037605/ENSBTAG00000037527/ENSBTAG00000012451/ENSBTAG00000010645/ENSBTAG00000012330/ENSBTAG00000019588/ENSBTAG00000013919/ENSBTAG00000007075/ENSBTAG00000007867/ENSBTAG00000014628/ENSBTAG00000021105/ENSBTAG00000008703/ENSBTAG00000019386/ENSBTAG00000015730/ENSBTAG00000002472/ENSBTAG00000020116/…
bta03440	Homologous recombination	22/1645	45/7030	0.000160158	0.00640631	ENSBTAG00000022520/ENSBTAG00000002918/ENSBTAG00000002492/ENSBTAG00000000988/ENSBTAG00000020301/ENSBTAG00000033690/ENSBTAG00000012068/ENSBTAG00000016869/ENSBTAG00000018971/ENSBTAG00000000526/ENSBTAG00000017087/ENSBTAG00000009711/ENSBTAG00000011083/ENSBTAG00000009966/ENSBTAG00000013225/ENSBTAG00000019901/ENSBTAG00000000632/ENSBTAG00000012241/ENSBTAG00000011252/ENSBTAG00000008925/ENSBTAG00000030897/…	BRCA1/RAD51/SYCP3/BRCA2/BLM/BARD1/BRIP1/POLD3/RAD51B/TOPBP1/TOP3A/RPA1/POLD1/XRCC3/NBN/RAD54L/RAD54B/POLD2/RAD50/MRE11/XRCC2/PALB2	bta:353120/bta:514749/bta:615896/bta:507069/bta:534148/bta:530961/bta:783256/bta:537616/bta:617007/bta:540574/bta:527411/bta:504844/bta:281990/bta:768244/bta:522943/bta:100140639/bta:533414/bta:281991/bta:788127/bta:525093/bta:789410/bta:507620	22	19	ENSBTAG00000022520/ENSBTAG00000002918/ENSBTAG00000000988/ENSBTAG00000020301/ENSBTAG00000033690/ENSBTAG00000012068/ENSBTAG00000016869/ENSBTAG00000000526/ENSBTAG00000017087/ENSBTAG00000009711/ENSBTAG00000011083/ENSBTAG00000009966/ENSBTAG00000019901/ENSBTAG00000000632/ENSBTAG00000012241/ENSBTAG00000011252/ENSBTAG00000008925/ENSBTAG00000030897/ENSBTAG00000006405	3	ENSBTAG00000002492/ENSBTAG00000018971/ENSBTAG00000013225
bta05206	MicroRNAs in cancer	59/1645	167/7030	0.000284897	0.0101297	ENSBTAG00000009987/ENSBTAG00000008353/ENSBTAG00000008409/ENSBTAG00000002006/ENSBTAG00000022520/ENSBTAG00000010422/ENSBTAG00000012180/ENSBTAG00000020244/ENSBTAG00000004906/ENSBTAG00000020053/ENSBTAG00000009426/ENSBTAG00000020638/ENSBTAG00000002082/ENSBTAG00000002736/ENSBTAG00000000396/ENSBTAG00000003971/ENSBTAG00000051975/ENSBTAG00000000428/ENSBTAG00000017514/ENSBTAG00000002350/ENSBTAG00000009586/…	ITGB3/CDKN1A/MYC/THBS1/BRCA1/MDM2/BMF/EFNA1/CCNE2/ZEB1/EZH2/TIMP3/MARCKS/DNMT1/PIM1/E2F1/-/BAK1/CCND1/PIK3R2/CDC25A/UBE2I/NOTCH1/ERBB2/CRKL/ERBB3/VEGFA/CYP24A1/-/ZEB2/-/TPM1/-/HMOX1/EFNA4/VIM/E2F2/MTOR/CDKN1B/PDGFA/EZR/CYP1B1/KIF23/PDGFB/MAPK1/RPTOR/FSCN1/APC/CD44/PIK3R1/EFNA5/KRAS/ABL1/BMI1/SOX4/SLC45A3/MAPK7/CASP3/MMP16	bta:282642/bta:513497/bta:511077/bta:281530/bta:353120/bta:540378/bta:541141/bta:507319/bta:538436/bta:535183/bta:509106/bta:282094/bta:613548/bta:281119/bta:281402/bta:535369/bta:540378/bta:514090/bta:524530/bta:282308/bta:520188/bta:515573/bta:767866/bta:505709/bta:518180/bta:785655/bta:281572/bta:540080/bta:515573/bta:535183/bta:281585/bta:281544/bta:281585/bta:513221/bta:615879/bta:280955/bta…	59	44	ENSBTAG00000008353/ENSBTAG00000008409/ENSBTAG00000002006/ENSBTAG00000022520/ENSBTAG00000010422/ENSBTAG00000004906/ENSBTAG00000020053/ENSBTAG00000009426/ENSBTAG00000020638/ENSBTAG00000002736/ENSBTAG00000000396/ENSBTAG00000003971/ENSBTAG00000051975/ENSBTAG00000000428/ENSBTAG00000017514/ENSBTAG00000002350/ENSBTAG00000009586/ENSBTAG00000038866/ENSBTAG00000022799/ENSBTAG00000045548/ENSBTAG00000005339/…	15	ENSBTAG00000009987/ENSBTAG00000012180/ENSBTAG00000020244/ENSBTAG00000002082/ENSBTAG00000021798/ENSBTAG00000010444/ENSBTAG00000002765/ENSBTAG00000010673/ENSBTAG00000018463/ENSBTAG00000018254/ENSBTAG00000014541/ENSBTAG00000021697/ENSBTAG00000016515/ENSBTAG00000009778/ENSBTAG00000015584
bta04145	Phagosome	57/1645	162/7030	0.000404363	0.0129396	ENSBTAG00000009987/ENSBTAG00000002006/ENSBTAG00000017280/ENSBTAG00000037605/ENSBTAG00000010620/ENSBTAG00000008612/ENSBTAG00000046337/ENSBTAG00000017135/ENSBTAG00000006240/ENSBTAG00000012451/ENSBTAG00000030974/ENSBTAG00000052518/ENSBTAG00000010645/ENSBTAG00000013755/ENSBTAG00000019588/ENSBTAG00000013919/ENSBTAG00000007075/ENSBTAG00000017077/ENSBTAG00000012244/ENSBTAG00000027134/ENSBTAG00000017060/…	ITGB3/THBS1/C3/BOLA-DQA1/ATP6V1B1/C1R/TUBB6/CTSS/TLR4/BOLA-DMB/TUBA4A/TUBB4B/BOLA-DRA/ITGB5/BLA-DQB/-/-/CTSL2/TUBA1B/DYNC1I1/ITGB2/TFRC/SCARB1/BOLA-NC1/TUBB2A/HLA-DMA/JSP.1/TUBB/LAMP2/-/ATP6V0B/-/STX12/PLA2R1/-/-/-/-/-/HGS/CD36/STX7/-/ATP6V1G1/RAB7B/TUBA1A/ATP6V0A4/SEC22B/TUBA1C/BoLA/EEA1/ATP6V1H/-/M6PR/ATP6V1B2/-/BOLA-DQA5	bta:282642/bta:281530/bta:280677/bta:100848815/bta:338059/bta:511581/bta:534206/bta:327711/bta:281536/bta:282491/bta:777775/bta:539149/bta:506214/bta:282564/bta:539241/bta:282530/bta:533049/bta:281108/bta:539882/bta:613724/bta:281877/bta:504698/bta:282346/bta:510417/bta:100295973/bta:282490/bta:407173/bta:615087/bta:529148/bta:282535/bta:505684/bta:407173/bta:505538/bta:317777/bta:112443216/bta:6…	57	21	ENSBTAG00000002006/ENSBTAG00000046337/ENSBTAG00000030974/ENSBTAG00000052518/ENSBTAG00000012244/ENSBTAG00000027134/ENSBTAG00000032719/ENSBTAG00000014269/ENSBTAG00000048485/ENSBTAG00000006969/ENSBTAG00000040518/novel.1697/ENSBTAG00000050859/ENSBTAG00000000411/ENSBTAG00000017866/ENSBTAG00000012774/ENSBTAG00000001489/ENSBTAG00000007712/ENSBTAG00000039992/ENSBTAG00000000421/ENSBTAG00000054330	36	ENSBTAG00000009987/ENSBTAG00000017280/ENSBTAG00000037605/ENSBTAG00000010620/ENSBTAG00000008612/ENSBTAG00000017135/ENSBTAG00000006240/ENSBTAG00000012451/ENSBTAG00000010645/ENSBTAG00000013755/ENSBTAG00000019588/ENSBTAG00000013919/ENSBTAG00000007075/ENSBTAG00000017077/ENSBTAG00000017060/ENSBTAG00000019386/ENSBTAG00000015730/ENSBTAG00000020116/ENSBTAG00000007399/ENSBTAG00000009656/ENSBTAG00000018889/…
bta03410	Base excision repair	17/1645	34/7030	0.000636996	0.0183307	ENSBTAG00000000590/ENSBTAG00000004931/ENSBTAG00000018103/ENSBTAG00000004769/ENSBTAG00000016869/ENSBTAG00000006065/ENSBTAG00000011083/ENSBTAG00000007777/ENSBTAG00000016268/ENSBTAG00000014595/ENSBTAG00000014862/ENSBTAG00000017189/ENSBTAG00000005825/ENSBTAG00000012241/ENSBTAG00000000837/ENSBTAG00000021974/ENSBTAG00000000671	POLE/POLE2/HMGB1/NEIL2/POLD3/PCNA/POLD1/OGG1/XRCC1/LIG1/-/POLE4/NEIL3/POLD2/PARP1/SMUG1/PARP3	bta:785457/bta:518653/bta:282691/bta:444987/bta:537616/bta:515499/bta:281990/bta:520497/bta:616905/bta:100124507/bta:282691/bta:613730/bta:515343/bta:281991/bta:286764/bta:539771/bta:507426	17	14	ENSBTAG00000000590/ENSBTAG00000004931/ENSBTAG00000018103/ENSBTAG00000016869/ENSBTAG00000006065/ENSBTAG00000011083/ENSBTAG00000007777/ENSBTAG00000016268/ENSBTAG00000014595/ENSBTAG00000014862/ENSBTAG00000005825/ENSBTAG00000012241/ENSBTAG00000000837/ENSBTAG00000000671	3	ENSBTAG00000004769/ENSBTAG00000017189/ENSBTAG00000021974
bta05416	Viral myocarditis	30/1645	74/7030	0.000726679	0.0183307	ENSBTAG00000037605/ENSBTAG00000012451/ENSBTAG00000022613/ENSBTAG00000010645/ENSBTAG00000019588/ENSBTAG00000013919/ENSBTAG00000007075/ENSBTAG00000017060/ENSBTAG00000006984/ENSBTAG00000019386/ENSBTAG00000017514/ENSBTAG00000015730/ENSBTAG00000002472/ENSBTAG00000020116/ENSBTAG00000020736/ENSBTAG00000009656/ENSBTAG00000005146/ENSBTAG00000015718/ENSBTAG00000012881/ENSBTAG00000038619/ENSBTAG00000004869/…	BOLA-DQA1/BOLA-DMB/CYCS/BOLA-DRA/BLA-DQB/-/-/ITGB2/-/BOLA-NC1/CCND1/HLA-DMA/CASP9/JSP.1/CD40/-/-/CASP8/EIF4G1/-/CXADR/-/ICAM1/BoLA/ABL1/ABL2/-/CASP3/EIF4G3/BOLA-DQA5	bta:100848815/bta:282491/bta:510767/bta:506214/bta:539241/bta:282530/bta:533049/bta:281877/bta:518609/bta:510417/bta:524530/bta:282490/bta:100140945/bta:407173/bta:286849/bta:282535/bta:407173/bta:507481/bta:444858/bta:512672/bta:281733/bta:507917/bta:281839/bta:533050/bta:540876/bta:511845/bta:767904/bta:408016/bta:534618/bta:282494	30	9	ENSBTAG00000022613/ENSBTAG00000017514/ENSBTAG00000020736/ENSBTAG00000012881/ENSBTAG00000010303/ENSBTAG00000017976/ENSBTAG00000015026/ENSBTAG00000015874/ENSBTAG00000040215	21	ENSBTAG00000037605/ENSBTAG00000012451/ENSBTAG00000010645/ENSBTAG00000019588/ENSBTAG00000013919/ENSBTAG00000007075/ENSBTAG00000017060/ENSBTAG00000006984/ENSBTAG00000019386/ENSBTAG00000015730/ENSBTAG00000002472/ENSBTAG00000020116/ENSBTAG00000009656/ENSBTAG00000005146/ENSBTAG00000015718/ENSBTAG00000038619/ENSBTAG00000004869/ENSBTAG00000012208/ENSBTAG00000005182/novel.990/ENSBTAG00000038128
bta05164	Influenza A	54/1645	155/7030	0.000744686	0.0183307	ENSBTAG00000014921/ENSBTAG00000019716/ENSBTAG00000053807/ENSBTAG00000039861/ENSBTAG00000008471/ENSBTAG00000016061/ENSBTAG00000030913/ENSBTAG00000001321/ENSBTAG00000003366/ENSBTAG00000037605/ENSBTAG00000037527/ENSBTAG00000012225/ENSBTAG00000008142/ENSBTAG00000006240/ENSBTAG00000012451/ENSBTAG00000022613/ENSBTAG00000010645/ENSBTAG00000019588/ENSBTAG00000013919/ENSBTAG00000007867/ENSBTAG00000014628/…	IL6/CXCL8/-/OAS1Y/MX2/RSAD2/MX1/IL1B/DDX58/BOLA-DQA1/OAS1Z/KPNA2/IFIH1/TLR4/BOLA-DMB/CYCS/BOLA-DRA/BLA-DQB/-/STAT1/OAS2/IRAK4/EIF2AK2/TNFSF10/BAK1/TICAM1/HLA-DMA/CASP9/PIK3R2/-/CCND3/-/IRF9/CASP8/KPNA1/CALCOCO2/RNASEL/NXT1/APAF1/IRF7/SLC25A4/TNFRSF1A/MAPK1/ICAM1/-/PIK3R1/-/FADD/TRAF3/IL1A/CASP3/VDAC1/KPNA6/BOLA-DQA5	bta:280826/bta:280828/bta:347699/bta:654488/bta:280873/bta:506415/bta:280872/bta:281251/bta:504760/bta:100848815/bta:519922/bta:513592/bta:535490/bta:281536/bta:282491/bta:510767/bta:506214/bta:539241/bta:282530/bta:510814/bta:529660/bta:533692/bta:347700/bta:507215/bta:514090/bta:510427/bta:282490/bta:100140945/bta:282308/bta:282535/bta:540547/bta:104968444/bta:509855/bta:507481/bta:539679/bta:2…	54	21	ENSBTAG00000014921/ENSBTAG00000019716/ENSBTAG00000001321/ENSBTAG00000012225/ENSBTAG00000022613/ENSBTAG00000000428/ENSBTAG00000019966/ENSBTAG00000002350/ENSBTAG00000049392/ENSBTAG00000011143/ENSBTAG00000004993/ENSBTAG00000013208/ENSBTAG00000010312/ENSBTAG00000010303/novel.1784/ENSBTAG00000010989/ENSBTAG00000051588/ENSBTAG00000018274/ENSBTAG00000013475/ENSBTAG00000015874/ENSBTAG00000002896	33	ENSBTAG00000053807/ENSBTAG00000039861/ENSBTAG00000008471/ENSBTAG00000016061/ENSBTAG00000030913/ENSBTAG00000003366/ENSBTAG00000037605/ENSBTAG00000037527/ENSBTAG00000008142/ENSBTAG00000006240/ENSBTAG00000012451/ENSBTAG00000010645/ENSBTAG00000019588/ENSBTAG00000013919/ENSBTAG00000007867/ENSBTAG00000014628/ENSBTAG00000021105/ENSBTAG00000008703/ENSBTAG00000018994/ENSBTAG00000015730/ENSBTAG00000002472/…
bta03030	DNA replication	18/1645	38/7030	0.00100694	0.0230159	ENSBTAG00000017021/ENSBTAG00000014380/ENSBTAG00000010721/ENSBTAG00000015595/ENSBTAG00000000590/ENSBTAG00000004931/ENSBTAG00000015172/ENSBTAG00000002620/ENSBTAG00000016869/ENSBTAG00000008170/ENSBTAG00000006065/ENSBTAG00000011455/ENSBTAG00000009711/ENSBTAG00000011083/ENSBTAG00000005577/ENSBTAG00000014595/ENSBTAG00000017189/ENSBTAG00000012241	MCM4/MCM2/MCM3/MCM5/POLE/POLE2/MCM6/DNA2/POLD3/POLA1/PCNA/POLA2/RPA1/POLD1/RNASEH2C/LIG1/POLE4/POLD2	bta:504367/bta:510120/bta:281302/bta:506970/bta:785457/bta:518653/bta:517812/bta:540969/bta:537616/bta:534848/bta:515499/bta:514793/bta:504844/bta:281990/bta:505618/bta:100124507/bta:613730/bta:281991	18	17	ENSBTAG00000017021/ENSBTAG00000014380/ENSBTAG00000010721/ENSBTAG00000015595/ENSBTAG00000000590/ENSBTAG00000004931/ENSBTAG00000015172/ENSBTAG00000002620/ENSBTAG00000016869/ENSBTAG00000008170/ENSBTAG00000006065/ENSBTAG00000011455/ENSBTAG00000009711/ENSBTAG00000011083/ENSBTAG00000005577/ENSBTAG00000014595/ENSBTAG00000012241	1	ENSBTAG00000017189
bta04142	Lysosome	45/1645	127/7030	0.00134398	0.0286715	ENSBTAG00000017135/ENSBTAG00000009506/ENSBTAG00000017465/ENSBTAG00000001752/ENSBTAG00000006082/ENSBTAG00000017077/ENSBTAG00000015403/ENSBTAG00000030434/ENSBTAG00000011931/ENSBTAG00000020773/ENSBTAG00000003636/ENSBTAG00000007002/ENSBTAG00000021499/ENSBTAG00000010994/ENSBTAG00000007399/ENSBTAG00000017992/ENSBTAG00000010992/ENSBTAG00000015512/ENSBTAG00000016053/ENSBTAG00000018889/ENSBTAG00000016021/…	CTSS/NAGA/GNS/FUCA2/DNASE2/CTSL2/TPP1/FUCA1/CD63/CTSW/LIPA/IDUA/PSAP/CTSF/LAMP2/CD164/CTSH/HEXB/ARSA/ATP6V0B/GAA/NPC2/-/SGSH/CTSK/-/SUMF1/NEU1/ASAH1/LAPTM4B/CTSB/PPT2/ATP6V0A4/AP1B1/ARSB/LITAF/AP1G2/ATP6V1H/M6PR/LGMN/CLTA/AP3M1/SMPD1/GLB1/GBA	bta:327711/bta:533357/bta:512444/bta:515729/bta:282218/bta:281108/bta:515575/bta:509522/bta:404156/bta:510967/bta:100125267/bta:511050/bta:281433/bta:509715/bta:529148/bta:509820/bta:510524/bta:618571/bta:505514/bta:505684/bta:280798/bta:280815/bta:404155/bta:535442/bta:513038/bta:550622/bta:536435/bta:505554/bta:510620/bta:404155/bta:281105/bta:516797/bta:518974/bta:506192/bta:538401/bta:520564/…	45	5	ENSBTAG00000020773/ENSBTAG00000050859/ENSBTAG00000001189/ENSBTAG00000008341/ENSBTAG00000021883	40	ENSBTAG00000017135/ENSBTAG00000009506/ENSBTAG00000017465/ENSBTAG00000001752/ENSBTAG00000006082/ENSBTAG00000017077/ENSBTAG00000015403/ENSBTAG00000030434/ENSBTAG00000011931/ENSBTAG00000003636/ENSBTAG00000007002/ENSBTAG00000021499/ENSBTAG00000010994/ENSBTAG00000007399/ENSBTAG00000017992/ENSBTAG00000010992/ENSBTAG00000015512/ENSBTAG00000016053/ENSBTAG00000018889/ENSBTAG00000016021/ENSBTAG00000021955/…
bta04068	FoxO signaling pathway	43/1645	122/7030	0.00191415	0.0382831	ENSBTAG00000014921/ENSBTAG00000008353/ENSBTAG00000010422/ENSBTAG00000019975/ENSBTAG00000017715/ENSBTAG00000016194/ENSBTAG00000051975/ENSBTAG00000014453/ENSBTAG00000018994/ENSBTAG00000017514/ENSBTAG00000011765/ENSBTAG00000002350/ENSBTAG00000016771/ENSBTAG00000007039/ENSBTAG00000006125/ENSBTAG00000014426/ENSBTAG00000004879/ENSBTAG00000039552/ENSBTAG00000011934/ENSBTAG00000006919/ENSBTAG00000014239/…	IL6/CDKN1A/MDM2/IL7R/HOMER2/FBXO32/-/PLK1/TNFSF10/CCND1/GABARAPL1/PIK3R2/PLK2/FBXO25/PLK3/PRKAG1/FOXO4/PLK4/PCK2/SMAD4/CCNB1/GABARAP/PRKAA1/CDKN1B/SGK1/BNIP3/KLF2/-/MAPK12/MAPK1/SKP2/TGFB1/TGFB3/CCNB3/USP7/GABARAPL2/MAPK11/PIK3R1/KRAS/SMAD3/NLK/SGK3/STK4	bta:280826/bta:513497/bta:540378/bta:521554/bta:510811/bta:513776/bta:540378/bta:538238/bta:507215/bta:524530/bta:338472/bta:282308/bta:539449/bta:540328/bta:504282/bta:282324/bta:618793/bta:514405/bta:282856/bta:540248/bta:327679/bta:327715/bta:540404/bta:512613/bta:515854/bta:615342/bta:520939/bta:281496/bta:512943/bta:327672/bta:519018/bta:282089/bta:538957/bta:100301478/bta:514813/bta:282531/…	43	26	ENSBTAG00000014921/ENSBTAG00000008353/ENSBTAG00000010422/ENSBTAG00000019975/ENSBTAG00000051975/ENSBTAG00000014453/ENSBTAG00000017514/ENSBTAG00000002350/ENSBTAG00000016771/ENSBTAG00000006125/ENSBTAG00000014426/ENSBTAG00000039552/ENSBTAG00000014239/ENSBTAG00000017804/ENSBTAG00000052504/ENSBTAG00000019574/ENSBTAG00000010312/ENSBTAG00000013562/ENSBTAG00000020457/ENSBTAG00000046286/ENSBTAG00000005455/…	17	ENSBTAG00000017715/ENSBTAG00000016194/ENSBTAG00000018994/ENSBTAG00000011765/ENSBTAG00000007039/ENSBTAG00000004879/ENSBTAG00000011934/ENSBTAG00000006919/ENSBTAG00000014883/ENSBTAG00000000013/ENSBTAG00000018254/ENSBTAG00000004269/ENSBTAG00000006523/ENSBTAG00000012004/ENSBTAG00000006550/ENSBTAG00000009778/ENSBTAG00000013284
bta05152	Tuberculosis	54/1645	162/7030	0.00233439	0.0439415	ENSBTAG00000014921/ENSBTAG00000001321/ENSBTAG00000015228/ENSBTAG00000017280/ENSBTAG00000037605/ENSBTAG00000017135/ENSBTAG00000006240/ENSBTAG00000012451/ENSBTAG00000022613/ENSBTAG00000010645/ENSBTAG00000019588/ENSBTAG00000013919/ENSBTAG00000007867/ENSBTAG00000054461/ENSBTAG00000017060/ENSBTAG00000021105/ENSBTAG00000015730/ENSBTAG00000002472/ENSBTAG00000051972/ENSBTAG00000007399/ENSBTAG00000014583/…	IL6/IL1B/CD74/C3/BOLA-DQA1/CTSS/TLR4/BOLA-DMB/CYCS/BOLA-DRA/BLA-DQB/-/STAT1/-/ITGB2/IRAK4/HLA-DMA/CASP9/CEBPB/LAMP2/CALM3/-/LBP/ATP6V0B/RIPK2/NFYB/CALM1/PLK3/IRAK1/CASP8/PLA2R1/-/APAF1/TNFRSF1A/MAPK12/MAPK1/TGFB1/RFXAP/TGFB3/LSP1/PPP3R1/ATP6V0A4/SPHK2/MAPK11/PPP3CA/FADD/EEA1/ATP6V1H/CREB1/IL1A/IL23A/CAMK2A/CASP3/BOLA-DQA5	bta:280826/bta:281251/bta:613384/bta:280677/bta:100848815/bta:327711/bta:281536/bta:282491/bta:510767/bta:506214/bta:539241/bta:282530/bta:510814/bta:101904063/bta:281877/bta:533692/bta:282490/bta:100140945/bta:338319/bta:529148/bta:520277/bta:282535/bta:512242/bta:505684/bta:534407/bta:614382/bta:520277/bta:504282/bta:533953/bta:507481/bta:317777/bta:550622/bta:537782/bta:282527/bta:512943/bta:3…	54	21	ENSBTAG00000014921/ENSBTAG00000001321/ENSBTAG00000022613/ENSBTAG00000051972/ENSBTAG00000014583/ENSBTAG00000015271/ENSBTAG00000030744/ENSBTAG00000025644/ENSBTAG00000006125/ENSBTAG00000016085/ENSBTAG00000050859/ENSBTAG00000019574/ENSBTAG00000010312/ENSBTAG00000020457/ENSBTAG00000005351/ENSBTAG00000030182/ENSBTAG00000016005/ENSBTAG00000018274/ENSBTAG00000000421/ENSBTAG00000005474/ENSBTAG00000015874	33	ENSBTAG00000015228/ENSBTAG00000017280/ENSBTAG00000037605/ENSBTAG00000017135/ENSBTAG00000006240/ENSBTAG00000012451/ENSBTAG00000010645/ENSBTAG00000019588/ENSBTAG00000013919/ENSBTAG00000007867/ENSBTAG00000054461/ENSBTAG00000017060/ENSBTAG00000021105/ENSBTAG00000015730/ENSBTAG00000002472/ENSBTAG00000007399/ENSBTAG00000009656/ENSBTAG00000016864/ENSBTAG00000018889/ENSBTAG00000015718/ENSBTAG00000032515/…
