# Supplementary material
Source: MDPI journal article supplement (https://www.mdpi.com/2077-0472/13/1/117)

**Figure S1 Sequencing of recombinant plasmid**

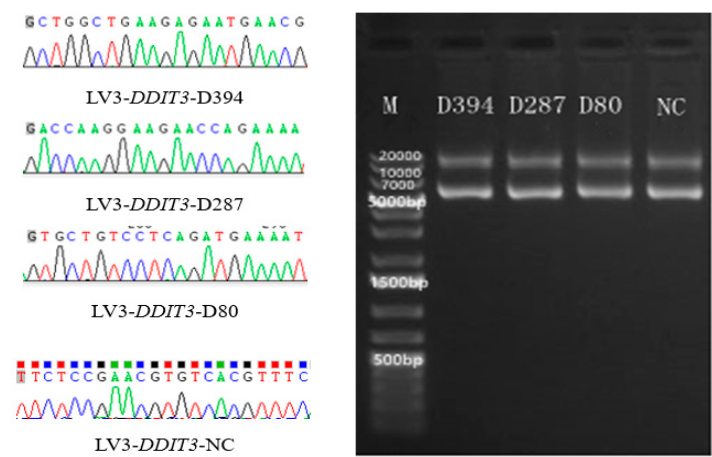

Supplement: s1 [file s1 › Figure S1.pdf]

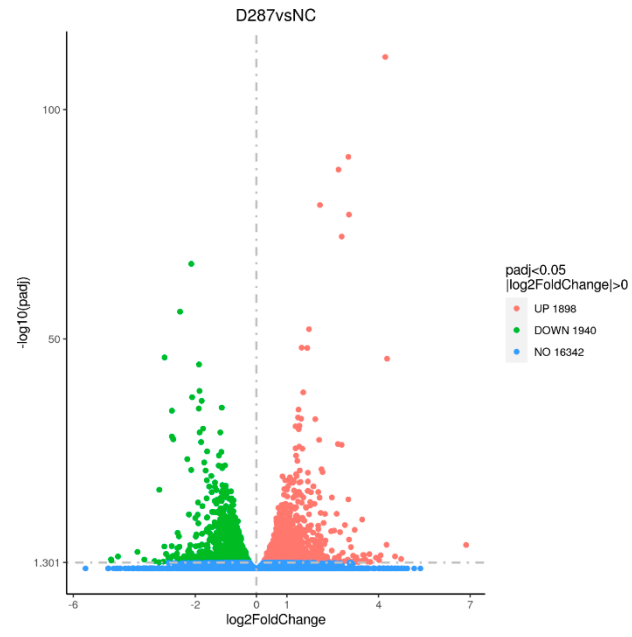

**Figure S2 DEGs among the DDIT3-KDvsNC groups**

Supplement: s1 [file s1 › Figure S2.pdf]
